# Supplementary material
Source: publisher figshare collection journal article supplement (https://diabetesjournals.figshare.com/articles/dataset/_/26317288)
Supplement: Supplementary file 1 [file 1]

| Gene Name     | P-Values | Log2 transformed |                    |               |               |               |              |        |        | change in mutants |        |
|---------------|----------|------------------|--------------------|---------------|---------------|---------------|--------------|--------|--------|-------------------|--------|
|               |          | fold-change      | Average progenitor | Progenitor -1 | Progenitor -2 | Progenitor -3 | Average beta | Beta-1 | Beta-2 |                   | Beta-3 |
| Olfr113       | 0.046    | 8.456            | -0.718             | -0.082        | -0.886        | -1.188        | -9.174       | #####  | -5.864 | -6.640            | Down   |
| Mrc1          | 0.019    | 7.697            | 3.880              | 4.834         | 4.862         | 1.943         | -3.818       | -0.643 | -4.054 | -6.756            |        |
| Bcl2a1a       | 0.000    | 7.003            | 0.363              | 1.099         | 0.780         | -0.790        | -6.640       | -6.640 | -6.640 | -6.640            |        |
| Lyz2          | 0.007    | 6.900            | 3.486              | 4.393         | 4.476         | 1.589         | -3.414       | -2.747 | -5.350 | -2.145            |        |
| Olfr719-ps    | 0.000    | 6.885            | 0.245              | 0.491         | 0.272         | -0.030        | -6.640       | -6.640 | -6.640 | -6.640            |        |
| Cybb          | 0.034    | 6.865            | 2.427              | 3.124         | 3.001         | 1.156         | -4.438       | -0.277 | -6.460 | -6.577            |        |
| Gm26275       | 0.000    | 6.698            | 0.058              | -0.028        | 0.752         | -0.549        | -6.640       | -6.640 | -6.640 | -6.640            |        |
| Gm20624       | 0.017    | 6.611            | 1.639              | 1.856         | 1.389         | 1.672         | -4.972       | -6.640 | -1.635 | -6.640            |        |
| 4930442L01Rik | 0.000    | 6.358            | -0.282             | -0.563        | -0.782        | 0.501         | -6.640       | -6.640 | -6.640 | -6.640            |        |
| Tlr1          | 0.001    | 6.272            | -0.342             | 0.095         | 0.485         | -1.608        | -6.614       | -6.640 | -6.563 | -6.640            |        |
| C3ar1         | 0.006    | 6.206            | 1.976              | 2.993         | 2.875         | 0.060         | -4.230       | -3.122 | -4.140 | -5.427            |        |
| Ccl9          | 0.001    | 6.039            | -1.029             | -0.109        | -1.087        | -1.893        | -7.069       | -6.640 | -6.368 | -8.198            |        |
| Efna4         | 0.002    | 5.859            | 0.442              | 0.399         | 0.511         | 0.416         | -5.417       | -6.640 | -5.747 | -3.864            |        |
| Dab2          | 0.005    | 5.840            | 4.343              | 5.493         | 5.194         | 2.342         | -1.497       | -1.976 | -1.597 | -0.917            |        |
| Msr1          | 0.005    | 5.833            | 1.454              | 2.456         | 2.116         | -0.211        | -4.379       | -3.230 | -4.733 | -5.173            |        |
| Ccl7          | 0.013    | 5.757            | 1.406              | 2.046         | 2.198         | -0.025        | -4.351       | -3.490 | -2.923 | -6.640            |        |
| Olfr203       | 0.000    | 5.683            | -0.957             | -1.417        | -0.347        | -1.108        | -6.640       | -6.640 | -6.640 | -6.640            |        |
| Bin2          | 0.000    | 5.651            | -0.989             | -0.329        | -1.459        | -1.180        | -6.640       | -6.640 | -6.640 | -6.640            |        |
| Rin3          | 0.006    | 5.611            | -0.014             | 0.173         | 0.333         | -0.546        | -5.624       | -3.592 | -6.640 | -6.640            |        |
| Ugt1a5        | 0.001    | 5.606            | -1.034             | -0.522        | -0.130        | -2.449        | -6.640       | -6.640 | -6.640 | -6.640            |        |
| RP24-194K24.9 | 0.000    | 5.560            | -1.080             | -1.833        | -1.052        | -0.354        | -6.640       | -6.640 | -6.640 | -6.640            |        |
| Wfdc10        | 0.000    | 5.550            | -1.090             | -0.453        | -1.257        | -1.559        | -6.640       | -6.640 | -6.640 | -6.640            |        |
| Gm15696       | 0.001    | 5.549            | -1.091             | -0.952        | -2.171        | -0.151        | -6.640       | -6.640 | -6.640 | -6.640            |        |
| Neurod2       | 0.008    | 5.484            | 0.817              | 1.518         | 0.232         | 0.700         | -4.667       | -4.225 | -6.640 | -3.137            |        |
| Aox4          | 0.000    | 5.445            | -1.151             | -1.063        | -2.031        | -0.361        | -6.597       | -6.510 | -6.640 | -6.640            |        |
| Plek          | 0.035    | 5.412            | 2.289              | 3.290         | 2.907         | 0.671         | -3.122       | -6.140 | -1.971 | -1.255            |        |
| Nckap1l       | 0.008    | 5.397            | -0.085             | 0.985         | 0.682         | -1.921        | -5.482       | -4.431 | -5.449 | -6.566            |        |
| Gm15060       | 0.001    | 5.343            | -1.297             | -0.635        | -0.685        | -2.571        | -6.640       | -6.640 | -6.640 | -6.640            |        |
| Gm17155       | 0.000    | 5.331            | -1.309             | -2.119        | -0.754        | -1.055        | -6.640       | -6.640 | -6.640 | -6.640            |        |
| Aspa          | 0.000    | 5.302            | -1.080             | -0.858        | -0.905        | -1.478        | -6.382       | -6.244 | -6.262 | -6.640            |        |
| Emp3          | 0.019    | 5.286            | -0.078             | 0.323         | 0.580         | -1.137        | -5.364       | -6.640 | -2.813 | -6.640            |        |
| Ctsc          | 0.005    | 5.235            | 3.827              | 4.552         | 4.598         | 2.331         | -1.408       | -1.126 | -2.494 | -0.605            |        |
| Ctse          | 0.001    | 5.204            | -0.621             | -1.008        | 0.243         | -1.097        | -5.825       | -6.640 | -5.742 | -5.093            |        |
| Gm8731        | 0.000    | 5.196            | -1.444             | -1.726        | -1.945        | -0.662        | -6.640       | -6.640 | -6.640 | -6.640            |        |
| Krtap17-1     | 0.003    | 5.196            | -0.700             | -0.401        | -1.428        | -0.270        | -5.895       | -6.640 | -4.406 | -6.640            |        |
| Gm11220       | 0.000    | 5.124            | -1.516             | -2.131        | -0.765        | -1.652        | -6.640       | -6.640 | -6.640 | -6.640            |        |
| Gbp3          | 0.002    | 5.022            | -1.264             | -0.556        | -0.647        | -2.589        | -6.285       | -6.640 | -6.550 | -5.667            |        |
| Abcg3         | 0.003    | 5.011            | -0.662             | 0.163         | -0.247        | -1.902        | -5.673       | -5.555 | -6.573 | -4.891            |        |
| Batf          | 0.001    | 4.996            | -1.644             | -1.064        | -2.868        | -1.000        | -6.640       | -6.640 | -6.640 | -6.640            |        |
| Gm11499       | 0.006    | 4.947            | -0.837             | -0.052        | -1.078        | -1.380        | -5.784       | -4.071 | -6.640 | -6.640            |        |
| Cd163         | 0.008    | 4.943            | -1.242             | -0.781        | -0.408        | -2.535        | -6.184       | -4.743 | -7.346 | -6.463            |        |
| Pla2g4a       | 0.002    | 4.859            | 1.074              | 0.486         | 0.971         | 1.766         | -3.785       | -2.678 | -4.668 | -4.008            |        |
| Nrsn1         | 0.001    | 4.858            | -1.330             | -2.026        | -1.041        | -0.923        | -6.188       | -6.640 | -5.283 | -6.640            | Up     |
| Trim30c       | 0.003    | 4.830            | -1.152             | -0.636        | -1.128        | -1.693        | -5.983       | -4.669 | -6.640 | -6.640            |        |
| Btk           | 0.001    | 4.801            | -1.839             | -1.724        | -1.000        | -2.792        | -6.640       | -6.640 | -6.640 | -6.640            |        |
| Lgals9        | 0.008    | 4.784            | -0.198             | 0.344         | 0.118         | -1.057        | -4.982       | -3.644 | -4.662 | -6.640            |        |
| Gm12598       | 0.013    | 4.719            | -0.895             | -1.574        | -1.015        | -0.095        | -5.613       | -3.560 | -6.640 | -6.640            | Up     |
| Al607873      | 0.025    | 4.712            | 0.291              | 1.462         | 1.321         | -1.911        | -4.421       | -3.811 | -3.507 | -5.946            |        |
| Thbs1         | 0.015    | 4.707            | -0.712             | -0.035        | -0.284        | -1.817        | -5.420       | -3.432 | -6.187 | -6.640            |        |
| Fgl1          | 0.006    | 4.663            | -0.856             | -0.863        | -1.036        | -0.669        | -5.520       | -4.117 | -7.162 | -5.280            |        |
| Laptm5        | 0.003    | 4.611            | 2.018              | 2.648         | 1.986         | 1.419         | -2.593       | -1.395 | -3.427 | -2.957            |        |
| Itgam         | 0.017    | 4.587            | 0.823              | 1.523         | 1.552         | -0.604        | -3.764       | -3.825 | -5.332 | -2.136            |        |
| Lpcat2        | 0.007    | 4.568            | -0.777             | 0.085         | -0.466        | -1.952        | -5.345       | -4.630 | -6.640 | -4.765            |        |
| Gm12639       | 0.016    | 4.560            | -1.011             | -0.421        | -0.862        | -1.749        | -5.571       | -6.640 | -3.433 | -6.640            |        |

|               |       |       |        |        |        |        |        |        |        |        |    |
|---------------|-------|-------|--------|--------|--------|--------|--------|--------|--------|--------|----|
| Ptprc         | 0.041 | 4.515 | 1.957  | 2.599  | 3.091  | 0.181  | -2.558 | -0.925 | -1.804 | -4.946 |    |
| Aif1          | 0.019 | 4.510 | 2.643  | 3.755  | 3.773  | 0.401  | -1.867 | -2.245 | -2.263 | -1.092 |    |
| Atf3          | 0.001 | 4.492 | 2.742  | 2.976  | 2.888  | 2.362  | -1.750 | -2.583 | -0.972 | -1.695 | Up |
| Arhgap30      | 0.011 | 4.491 | 0.381  | 0.995  | 1.478  | -1.331 | -4.111 | -3.524 | -3.734 | -5.074 |    |
| Sla           | 0.018 | 4.488 | 0.370  | 0.942  | 1.260  | -1.091 | -4.118 | -4.166 | -2.523 | -5.665 |    |
| S100a6        | 0.005 | 4.487 | -1.370 | -1.508 | -0.990 | -1.614 | -5.857 | -6.640 | -4.291 | -6.640 | Up |
| Spi1          | 0.013 | 4.477 | -0.629 | 0.240  | -0.509 | -1.618 | -5.107 | -5.123 | -3.556 | -6.640 |    |
| Gm14828       | 0.005 | 4.474 | -1.388 | -1.825 | -1.407 | -0.931 | -5.862 | -6.640 | -6.640 | -4.306 |    |
| BC021785      | 0.002 | 4.470 | -1.231 | -1.555 | -1.391 | -0.749 | -5.701 | -6.640 | -4.646 | -5.817 |    |
| Clec12a       | 0.016 | 4.388 | 0.995  | 0.692  | 1.807  | 0.486  | -3.393 | -2.154 | -2.625 | -5.400 |    |
| Mpeg1         | 0.006 | 4.332 | 0.829  | 1.117  | 1.954  | -0.585 | -3.503 | -2.981 | -3.414 | -4.116 |    |
| Gm21968       | 0.013 | 4.330 | -1.361 | -0.771 | -1.212 | -2.099 | -5.691 | -6.640 | -3.793 | -6.640 |    |
| Gm10592       | 0.013 | 4.330 | -1.361 | -0.771 | -1.212 | -2.099 | -5.691 | -6.640 | -3.793 | -6.640 |    |
| F13a1         | 0.012 | 4.326 | 3.396  | 4.388  | 4.378  | 1.423  | -0.930 | -1.036 | -0.666 | -1.089 |    |
| Serpinf2      | 0.008 | 4.300 | -1.583 | -2.253 | -0.820 | -1.675 | -5.883 | -6.640 | -6.640 | -4.369 |    |
| Ankle1        | 0.034 | 4.287 | 0.693  | 1.733  | 1.808  | -1.462 | -3.594 | -5.202 | -3.050 | -2.530 |    |
| Cdc42ep3      | 0.000 | 4.268 | -0.324 | 0.104  | -0.360 | -0.716 | -4.592 | -4.069 | -4.502 | -5.204 | Up |
| Megf6         | 0.013 | 4.247 | -0.446 | 0.679  | -1.716 | -0.302 | -4.693 | -5.990 | -3.549 | -4.540 |    |
| Gm5292        | 0.000 | 4.230 | -1.101 | -1.217 | -1.349 | -0.738 | -5.332 | -5.400 | -5.281 | -5.313 |    |
| Hk2           | 0.021 | 4.227 | 1.941  | 2.473  | 2.665  | 0.686  | -2.286 | -3.627 | -0.432 | -2.799 |    |
| Aim2          | 0.017 | 4.133 | 1.238  | 1.923  | 2.462  | -0.671 | -2.895 | -3.191 | -3.369 | -2.124 |    |
| Cfh           | 0.028 | 4.088 | 1.669  | 2.530  | 2.699  | -0.222 | -2.419 | -1.110 | -2.440 | -3.706 |    |
| Rsad2         | 0.000 | 4.068 | -0.213 | 0.035  | -0.256 | -0.418 | -4.281 | -4.092 | -4.525 | -4.227 |    |
| Gdnf          | 0.008 | 4.059 | -1.443 | -1.107 | -0.354 | -2.869 | -5.503 | -4.980 | -5.413 | -6.115 |    |
| Ptafr         | 0.011 | 4.055 | -0.836 | 0.171  | -0.104 | -2.576 | -4.891 | -5.035 | -4.468 | -5.170 |    |
| Olfr1018      | 0.017 | 4.019 | -1.671 | -1.804 | -2.246 | -0.962 | -5.690 | -3.789 | -6.640 | -6.640 |    |
| Maf           | 0.020 | 4.008 | 0.839  | 2.005  | 1.784  | -1.272 | -3.169 | -3.414 | -2.988 | -3.103 |    |
| Nov           | 0.009 | 3.991 | -1.395 | -0.326 | -2.014 | -1.846 | -5.386 | -4.668 | -6.686 | -4.803 |    |
| Spp1          | 0.002 | 3.985 | 4.400  | 4.425  | 5.154  | 3.622  | 0.416  | 0.005  | 0.323  | 0.919  | Up |
| Gas6          | 0.037 | 3.960 | 0.400  | 1.233  | 1.238  | -1.273 | -3.561 | -5.510 | -2.528 | -2.645 | Up |
| Zdhhc15       | 0.044 | 3.946 | -1.467 | -1.448 | -0.984 | -1.969 | -5.413 | -2.757 | -6.682 | -6.799 |    |
| Cd180         | 0.018 | 3.931 | 1.379  | 2.513  | 2.188  | -0.563 | -2.551 | -2.374 | -3.090 | -2.190 |    |
| Sp100         | 0.034 | 3.930 | 0.566  | -0.090 | 1.578  | 0.209  | -3.364 | -1.144 | -4.087 | -4.862 |    |
| Epb4.2        | 0.002 | 3.910 | 1.028  | 1.763  | 0.104  | 1.216  | -2.882 | -2.603 | -2.903 | -3.139 |    |
| Apbb1ip       | 0.005 | 3.908 | 0.236  | 0.514  | 1.243  | -1.049 | -3.672 | -3.961 | -3.668 | -3.388 |    |
| B2m           | 0.013 | 3.892 | 4.075  | 4.831  | 4.842  | 2.552  | 0.184  | -0.821 | 0.813  | 0.559  |    |
| D330045A20Rik | 0.013 | 3.862 | -1.158 | -0.062 | -1.422 | -1.989 | -5.020 | -3.754 | -5.094 | -6.211 |    |
| Anxa3         | 0.019 | 3.857 | -0.588 | 0.175  | 0.550  | -2.489 | -4.445 | -4.727 | -3.745 | -4.862 |    |
| Cfi           | 0.002 | 3.835 | 0.094  | 0.209  | 0.930  | -0.857 | -3.741 | -4.154 | -3.365 | -3.704 |    |
| Tgif1         | 0.008 | 3.823 | 1.441  | 2.059  | 2.230  | 0.035  | -2.382 | -2.487 | -2.950 | -1.708 | Up |
| Ogfrl1        | 0.020 | 3.817 | -0.182 | 0.578  | 0.448  | -1.572 | -3.998 | -5.471 | -3.241 | -3.284 |    |
| Tgm7          | 0.002 | 3.797 | 2.312  | 3.071  | 1.839  | 2.024  | -1.486 | -2.213 | -0.983 | -1.261 |    |
| Slc28a3       | 0.012 | 3.725 | 3.069  | 3.346  | 3.622  | 2.238  | -0.656 | -2.134 | 0.309  | -0.143 |    |
| Casp4         | 0.011 | 3.716 | 0.268  | 0.930  | 0.960  | -1.087 | -3.448 | -2.524 | -4.032 | -3.788 |    |
| Cd300a        | 0.027 | 3.670 | -0.007 | 0.585  | 0.557  | -1.164 | -3.678 | -1.880 | -4.421 | -4.731 |    |
| Ikzf1         | 0.022 | 3.617 | -0.383 | 0.537  | 0.572  | -2.256 | -3.999 | -4.424 | -3.337 | -4.237 |    |
| Rasgef1b      | 0.035 | 3.601 | 2.384  | 3.088  | 3.135  | 0.930  | -1.217 | 0.564  | -2.049 | -2.166 |    |
| Hmox1         | 0.010 | 3.594 | 0.732  | 1.495  | 0.595  | 0.106  | -2.862 | -1.983 | -4.169 | -2.433 |    |
| Ms4a6c        | 0.034 | 3.580 | 0.669  | 1.086  | 1.772  | -0.852 | -2.911 | -1.964 | -2.254 | -4.514 |    |
| Ddx60         | 0.011 | 3.527 | -1.226 | -0.336 | -0.665 | -2.676 | -4.753 | -5.193 | -4.141 | -4.925 |    |
| Neurog3       | 0.002 | 3.513 | 3.646  | 4.403  | 2.681  | 3.855  | 0.133  | 0.241  | -0.040 | 0.199  | Up |
| Nrros         | 0.041 | 3.493 | 0.574  | 1.513  | 1.472  | -1.263 | -2.919 | -1.542 | -4.077 | -3.137 |    |
| Lama5         | 0.027 | 3.489 | 1.887  | 2.559  | 1.409  | 1.692  | -1.603 | -2.331 | -2.772 | 0.295  | Up |
| Col9a3        | 0.002 | 3.473 | 1.389  | 1.886  | 1.038  | 1.244  | -2.084 | -2.877 | -1.583 | -1.791 |    |
| Gm4852        | 0.039 | 3.468 | -1.261 | -1.799 | -1.662 | -0.320 | -4.728 | -2.716 | -5.226 | -6.243 |    |
| Gsta3         | 0.041 | 3.400 | 2.866  | 3.123  | 3.949  | 1.525  | -0.534 | -0.004 | -2.288 | 0.691  |    |

|               |       |       |        |        |        |        |        |        |        |        |      |
|---------------|-------|-------|--------|--------|--------|--------|--------|--------|--------|--------|------|
| Rel           | 0.013 | 3.393 | 0.372  | 1.389  | 0.750  | -1.024 | -3.022 | -2.822 | -3.648 | -2.595 |      |
| Prom1         | 0.005 | 3.384 | 2.491  | 2.991  | 2.345  | 2.137  | -0.893 | -2.006 | -0.454 | -0.219 |      |
| Mef2c         | 0.026 | 3.322 | 0.900  | 1.646  | 1.818  | -0.764 | -2.422 | -3.286 | -2.366 | -1.614 |      |
| Habp2         | 0.004 | 3.313 | 1.909  | 2.225  | 2.568  | 0.935  | -1.403 | -1.802 | -1.265 | -1.143 |      |
| Otud1         | 0.010 | 3.279 | 0.133  | 0.535  | 0.068  | -0.204 | -3.145 | -4.471 | -2.167 | -2.798 |      |
| Rasgrp3       | 0.000 | 3.272 | 3.279  | 3.534  | 3.196  | 3.107  | 0.007  | -0.457 | 0.517  | -0.039 |      |
| Cenpa         | 0.016 | 3.205 | 0.132  | 0.670  | 0.893  | -1.167 | -3.073 | -3.924 | -2.296 | -2.998 |      |
| Cxcr4         | 0.005 | 3.186 | -0.192 | 0.222  | 0.392  | -1.189 | -3.378 | -3.929 | -3.139 | -3.064 |      |
| Gm8420        | 0.031 | 3.181 | 0.465  | -0.244 | 0.735  | 0.903  | -2.716 | -1.813 | -4.532 | -1.804 |      |
| Gm8995        | 0.015 | 3.148 | -0.737 | -0.616 | 0.322  | -1.919 | -3.886 | -3.239 | -4.639 | -3.778 |      |
| Gins1         | 0.002 | 3.146 | 0.679  | 0.668  | 1.386  | -0.015 | -2.467 | -2.478 | -2.310 | -2.613 | Down |
| Ghrl          | 0.013 | 3.120 | 5.050  | 5.313  | 4.524  | 5.312  | 1.929  | 2.373  | 2.810  | 0.605  |      |
| Vav3          | 0.013 | 3.103 | 0.768  | 0.929  | 1.111  | 0.264  | -2.335 | -1.174 | -2.308 | -3.523 | Up   |
| Egflam        | 0.018 | 3.097 | -1.264 | -1.439 | -0.220 | -2.133 | -4.361 | -5.450 | -4.146 | -3.487 |      |
| Ankrd29       | 0.024 | 3.088 | -1.326 | -1.862 | -0.603 | -1.514 | -4.415 | -4.559 | -2.992 | -5.694 |      |
| Amotl2        | 0.001 | 3.077 | 2.038  | 2.607  | 1.459  | 2.049  | -1.038 | -1.441 | -0.895 | -0.778 | Up   |
| Vwde          | 0.002 | 3.066 | -1.043 | -1.607 | -0.933 | -0.589 | -4.109 | -3.586 | -4.019 | -4.721 |      |
| Lzts1         | 0.005 | 3.051 | -0.483 | 0.362  | -1.334 | -0.478 | -3.534 | -3.041 | -3.722 | -3.839 |      |
| Acot1         | 0.002 | 3.044 | 2.623  | 2.535  | 3.340  | 1.995  | -0.421 | -0.687 | -0.181 | -0.396 | Up   |
| Adamts1       | 0.018 | 3.038 | 3.534  | 3.999  | 4.509  | 2.094  | 0.496  | -0.040 | 0.662  | 0.866  |      |
| Sdc4          | 0.008 | 3.037 | 1.434  | 1.770  | 2.297  | 0.236  | -1.603 | -1.618 | -1.800 | -1.391 | Up   |
| Fyb           | 0.034 | 3.011 | 2.878  | 3.534  | 3.728  | 1.372  | -0.133 | -0.733 | -0.678 | 1.012  |      |
| 4930594C11Rik | 0.001 | 2.922 | -0.548 | -0.742 | 0.039  | -0.941 | -3.469 | -3.331 | -3.612 | -3.466 |      |
| Litaf         | 0.001 | 2.884 | 1.959  | 1.985  | 2.419  | 1.474  | -0.925 | -1.274 | -0.854 | -0.645 | Up   |
| Slc16a7       | 0.024 | 2.877 | 0.424  | 0.732  | 0.768  | -0.229 | -2.453 | -2.952 | -0.984 | -3.425 |      |
| Ggta1         | 0.014 | 2.870 | 0.996  | 1.565  | 1.685  | -0.262 | -1.873 | -1.647 | -2.434 | -1.539 |      |
| Lynx1         | 0.004 | 2.851 | -0.790 | -0.119 | -1.624 | -0.628 | -3.642 | -3.577 | -3.373 | -3.975 |      |
| Gm13717       | 0.014 | 2.832 | 1.583  | 2.369  | 1.909  | 0.470  | -1.250 | -1.532 | -0.550 | -1.667 | Up   |
| Egr2          | 0.016 | 2.831 | 1.872  | 2.456  | 1.168  | 1.992  | -0.959 | -1.029 | 0.107  | -1.954 |      |
| Gpc2          | 0.001 | 2.830 | 1.444  | 1.911  | 1.200  | 1.221  | -1.386 | -1.627 | -1.094 | -1.438 |      |
| Ier2          | 0.016 | 2.829 | 0.214  | 0.361  | 0.631  | -0.349 | -2.615 | -3.647 | -1.417 | -2.782 | Up   |
| Klf6          | 0.013 | 2.811 | 3.679  | 4.159  | 4.397  | 2.481  | 0.868  | 0.383  | 1.276  | 0.944  |      |
| Map3k8        | 0.021 | 2.808 | -0.517 | 0.331  | -0.407 | -1.477 | -3.325 | -3.649 | -2.258 | -4.069 |      |
| Ckap2l        | 0.036 | 2.796 | -0.736 | -0.568 | 0.124  | -1.763 | -3.532 | -2.637 | -3.018 | -4.942 | Down |
| Lmo4          | 0.002 | 2.791 | 2.153  | 2.264  | 2.558  | 1.638  | -0.638 | -1.081 | -0.752 | -0.081 | Up   |
| Gm12852       | 0.008 | 2.787 | -0.870 | -0.005 | -0.990 | -1.614 | -3.657 | -3.273 | -4.291 | -3.408 |      |
| St8sia4       | 0.026 | 2.776 | 0.226  | 0.633  | 1.276  | -1.231 | -2.550 | -2.052 | -2.526 | -3.072 |      |
| Jun           | 0.004 | 2.771 | 4.637  | 5.008  | 4.406  | 4.497  | 1.866  | 1.444  | 2.696  | 1.459  | Up   |
| Dse           | 0.036 | 2.763 | -0.633 | 0.284  | 0.182  | -2.364 | -3.396 | -3.093 | -3.281 | -3.813 |      |
| Mospd1        | 0.000 | 2.756 | 1.069  | 1.451  | 1.007  | 0.749  | -1.687 | -1.431 | -1.756 | -1.873 |      |
| Grin3a        | 0.007 | 2.750 | 1.287  | 1.609  | 1.484  | 0.767  | -1.463 | -0.546 | -1.759 | -2.085 |      |
| Rasl11b       | 0.009 | 2.740 | 2.152  | 2.777  | 1.721  | 1.958  | -0.588 | -0.686 | -1.367 | 0.289  |      |
| Slc15a2       | 0.008 | 2.734 | 1.440  | 2.218  | 0.774  | 1.328  | -1.294 | -0.762 | -1.138 | -1.981 |      |
| Tmsb4x        | 0.011 | 2.729 | 7.170  | 7.660  | 7.718  | 6.131  | 4.441  | 3.829  | 4.829  | 4.664  |      |
| D17H6S56E-5   | 0.027 | 2.714 | 1.663  | 2.343  | 2.470  | 0.177  | -1.050 | -1.337 | -1.310 | -0.503 |      |
| Cfp           | 0.045 | 2.702 | 0.221  | 0.187  | 0.626  | -0.151 | -2.481 | -2.767 | -0.774 | -3.902 |      |
| Adamtsl2      | 0.040 | 2.697 | -1.692 | -1.050 | -3.128 | -0.899 | -4.389 | -3.359 | -5.214 | -4.594 |      |
| Gsta4         | 0.017 | 2.690 | 1.690  | 1.205  | 2.682  | 1.184  | -1.000 | -1.830 | -0.204 | -0.965 | Up   |
| Nr4a1         | 0.008 | 2.689 | 1.089  | 1.589  | 1.176  | 0.502  | -1.600 | -2.114 | -0.699 | -1.986 |      |
| Slc9a9        | 0.006 | 2.684 | 1.338  | 1.805  | 1.831  | 0.378  | -1.347 | -1.008 | -1.459 | -1.573 |      |
| Mdk           | 0.007 | 2.681 | 4.803  | 5.368  | 4.568  | 4.473  | 2.122  | 1.630  | 3.001  | 1.734  |      |
| Hes1          | 0.013 | 2.680 | 2.101  | 2.506  | 2.821  | 0.975  | -0.579 | -0.885 | -0.039 | -0.814 | Up   |
| Gm26857       | 0.013 | 2.671 | -0.433 | 0.265  | 0.046  | -1.612 | -3.104 | -2.737 | -3.340 | -3.235 |      |
| Cdo1          | 0.016 | 2.669 | 2.108  | 2.281  | 2.915  | 1.128  | -0.561 | -1.070 | -0.866 | 0.254  |      |
| Nfkbiz        | 0.017 | 2.665 | 3.057  | 4.010  | 3.403  | 1.759  | 0.392  | 0.412  | 0.455  | 0.310  |      |
| Gm15536       | 0.001 | 2.658 | 11.380 | 11.250 | 11.353 | 11.536 | 8.721  | 8.146  | 9.067  | 8.950  |      |

|               |       |       |        |        |        |        |        |        |        |        |      |
|---------------|-------|-------|--------|--------|--------|--------|--------|--------|--------|--------|------|
| Fhl2          | 0.039 | 2.650 | 0.923  | 1.426  | 0.171  | 1.172  | -1.727 | -3.106 | -1.709 | -0.367 | Up   |
| Gm3173        | 0.001 | 2.649 | -1.067 | -1.491 | -0.437 | -1.274 | -3.716 | -3.693 | -3.656 | -3.798 |      |
| Fgfr1l        | 0.010 | 2.645 | -0.474 | -0.423 | -0.030 | -0.969 | -3.119 | -2.207 | -3.225 | -3.927 | Up   |
| Tlr4          | 0.034 | 2.644 | -0.892 | 0.061  | -0.225 | -2.512 | -3.537 | -3.793 | -3.642 | -3.175 |      |
| Rnasel        | 0.016 | 2.644 | 2.212  | 3.108  | 2.179  | 1.349  | -0.432 | -0.623 | -1.045 | 0.373  | Up   |
| Tns1          | 0.004 | 2.642 | -1.211 | -0.796 | -0.825 | -2.012 | -3.854 | -3.639 | -4.242 | -3.681 |      |
| Gm26669       | 0.031 | 2.634 | 3.738  | 4.294  | 4.730  | 2.189  | 1.104  | 1.443  | 0.870  | 0.999  |      |
| Slc7a7        | 0.040 | 2.633 | -0.420 | 0.459  | -0.165 | -1.554 | -3.053 | -2.399 | -2.417 | -4.342 |      |
| Wwtr1         | 0.041 | 2.632 | -1.323 | -0.893 | -0.471 | -2.603 | -3.954 | -4.839 | -4.218 | -2.805 |      |
| Gm25791       | 0.010 | 2.621 | 7.037  | 6.899  | 7.417  | 6.794  | 4.415  | 4.466  | 3.448  | 5.331  |      |
| A630001G21Rik | 0.046 | 2.613 | -0.002 | 0.656  | -0.359 | -0.304 | -2.615 | -1.118 | -2.668 | -4.058 |      |
| Gm26953       | 0.022 | 2.610 | 6.184  | 7.043  | 4.857  | 6.653  | 3.574  | 3.108  | 3.946  | 3.669  |      |
| Myl9          | 0.006 | 2.599 | -0.140 | 0.001  | -0.472 | 0.050  | -2.740 | -3.129 | -1.825 | -3.264 |      |
| Cd2           | 0.008 | 2.593 | -0.274 | 0.314  | -1.128 | -0.009 | -2.868 | -3.090 | -2.288 | -3.225 |      |
| Mir17hg       | 0.030 | 2.590 | 0.612  | 1.203  | 0.782  | -0.150 | -1.979 | -0.670 | -2.309 | -2.957 |      |
| Trip13        | 0.019 | 2.579 | 1.427  | 1.095  | 2.405  | 0.781  | -1.152 | -1.297 | -1.856 | -0.303 |      |
| Hcrr2         | 0.020 | 2.578 | -1.178 | -1.252 | -0.537 | -1.746 | -3.756 | -3.011 | -4.928 | -3.329 |      |
| Gm26589       | 0.039 | 2.574 | -1.612 | -1.695 | -0.788 | -2.353 | -4.186 | -4.329 | -5.347 | -2.880 |      |
| Gm11223       | 0.014 | 2.569 | 4.181  | 4.613  | 4.830  | 3.098  | 1.612  | 1.165  | 1.526  | 2.144  |      |
| Bcl11b        | 0.011 | 2.560 | -0.740 | -0.570 | -0.703 | -0.946 | -3.300 | -2.993 | -2.531 | -4.376 |      |
| L3mbtl3       | 0.009 | 2.552 | 1.225  | 1.427  | 1.021  | 1.228  | -1.327 | -2.333 | -1.061 | -0.588 | Up   |
| Zfp36         | 0.007 | 2.533 | 6.079  | 6.773  | 6.230  | 5.233  | 3.545  | 3.175  | 3.668  | 3.793  | Up   |
| Sat1          | 0.009 | 2.526 | 4.239  | 4.662  | 4.700  | 3.355  | 1.713  | 1.701  | 1.217  | 2.222  |      |
| Bche          | 0.027 | 2.525 | 0.074  | -0.166 | 0.902  | -0.516 | -2.451 | -1.759 | -1.938 | -3.656 |      |
| Ttyh1         | 0.024 | 2.505 | 2.257  | 2.421  | 2.980  | 1.371  | -0.248 | -0.849 | -0.704 | 0.809  |      |
| Gm12517       | 0.013 | 2.494 | 0.960  | 1.088  | 0.547  | 1.245  | -1.534 | -2.012 | -0.445 | -2.147 |      |
| Cdkn1a        | 0.006 | 2.493 | 3.712  | 4.423  | 3.018  | 3.695  | 1.219  | 0.760  | 1.500  | 1.398  |      |
| Lrrtm3        | 0.005 | 2.491 | 0.327  | 0.411  | -0.347 | 0.917  | -2.164 | -1.662 | -2.303 | -2.526 |      |
| Gpr34         | 0.013 | 2.486 | -0.854 | -0.553 | -0.302 | -1.706 | -3.340 | -2.689 | -4.029 | -3.301 |      |
| Bend6         | 0.047 | 2.485 | -1.214 | -2.383 | -0.655 | -0.603 | -3.699 | -3.693 | -2.575 | -4.828 |      |
| Fgf9          | 0.031 | 2.479 | 0.986  | 0.734  | 0.843  | 1.382  | -1.493 | -2.843 | -0.305 | -1.331 | Up   |
| Gm5406        | 0.010 | 2.476 | 1.567  | 1.685  | 1.144  | 1.872  | -0.909 | 0.058  | -1.249 | -1.536 |      |
| Id2           | 0.008 | 2.476 | 2.340  | 2.221  | 2.958  | 1.840  | -0.136 | -0.878 | 0.037  | 0.434  | Up   |
| Kcnh7         | 0.014 | 2.472 | 1.406  | 1.530  | 1.611  | 1.078  | -1.066 | -0.332 | -2.182 | -0.684 |      |
| Cd24a         | 0.001 | 2.472 | 7.044  | 7.116  | 7.258  | 6.758  | 4.572  | 4.162  | 4.864  | 4.692  | Up   |
| Pmp22         | 0.017 | 2.469 | -0.159 | 0.721  | 0.074  | -1.272 | -2.628 | -2.340 | -2.483 | -3.060 |      |
| Stmn1         | 0.001 | 2.441 | 4.045  | 4.311  | 4.314  | 3.510  | 1.604  | 1.611  | 1.386  | 1.815  | Down |
| Cbfa2t2-ps1   | 0.014 | 2.417 | -1.039 | -0.332 | -1.499 | -1.286 | -3.456 | -4.267 | -2.700 | -3.402 |      |
| Gm10567       | 0.016 | 2.417 | 1.281  | 1.613  | 1.868  | 0.362  | -1.136 | -1.888 | -0.625 | -0.895 |      |
| Zyx           | 0.017 | 2.415 | -0.513 | 0.319  | -0.457 | -1.400 | -2.928 | -2.826 | -3.582 | -2.376 |      |
| Elovl7        | 0.016 | 2.413 | 1.146  | 0.958  | 1.375  | 1.105  | -1.267 | -1.038 | -2.377 | -0.387 | Up   |
| Kirrel2       | 0.044 | 2.412 | 0.413  | 1.072  | -0.831 | 0.999  | -1.999 | -2.802 | -2.249 | -0.944 |      |
| Zeb2          | 0.042 | 2.403 | 2.719  | 3.280  | 3.704  | 1.174  | 0.316  | 0.625  | -0.117 | 0.440  |      |
| Syk           | 0.015 | 2.398 | -1.350 | -0.803 | -0.722 | -2.525 | -3.749 | -3.847 | -3.666 | -3.733 |      |
| Prr11         | 0.016 | 2.396 | -0.201 | -0.198 | 0.662  | -1.068 | -2.597 | -2.205 | -2.340 | -3.247 |      |
| Cd97          | 0.023 | 2.393 | 0.681  | 1.096  | 1.195  | -0.248 | -1.712 | -1.785 | -2.508 | -0.844 |      |
| Gm13150       | 0.043 | 2.388 | 0.271  | -0.439 | 0.761  | 0.491  | -2.117 | -2.646 | -0.671 | -3.035 |      |
| Serpinf1      | 0.023 | 2.359 | 0.846  | 1.423  | 1.169  | -0.055 | -1.514 | -2.369 | -0.725 | -1.448 |      |
| Kank3         | 0.025 | 2.351 | -0.746 | -0.706 | -0.679 | -0.853 | -3.098 | -3.539 | -3.972 | -1.783 |      |
| Rbm24         | 0.025 | 2.349 | 0.054  | 0.585  | -0.570 | 0.147  | -2.295 | -2.523 | -1.191 | -3.173 |      |
| Aim1l         | 0.010 | 2.347 | 1.030  | 1.594  | 1.049  | 0.447  | -1.317 | -1.604 | -1.781 | -0.565 |      |
| Bcl2          | 0.001 | 2.329 | 0.775  | 1.194  | 0.445  | 0.687  | -1.554 | -1.777 | -1.688 | -1.197 |      |
| Bcl6          | 0.000 | 2.327 | -0.846 | -0.575 | -0.752 | -1.211 | -3.173 | -3.225 | -3.304 | -2.988 |      |
| Bmf           | 0.020 | 2.319 | -0.181 | -0.314 | -0.180 | -0.049 | -2.500 | -1.936 | -3.724 | -1.840 | Up   |
| Cat           | 0.004 | 2.319 | 3.744  | 3.884  | 4.200  | 3.149  | 1.426  | 1.002  | 1.703  | 1.572  | Up   |
| Kcnt2         | 0.048 | 2.318 | -1.039 | -1.815 | -0.320 | -0.982 | -3.357 | -2.039 | -3.623 | -4.408 |      |

|               |       |       |        |        |        |        |        |        |        |        |    |
|---------------|-------|-------|--------|--------|--------|--------|--------|--------|--------|--------|----|
| 9330159M07Rik | 0.008 | 2.312 | -0.315 | -0.522 | 0.480  | -0.903 | -2.627 | -3.002 | -2.201 | -2.678 |    |
| Dtx4          | 0.016 | 2.302 | -0.416 | -0.583 | 0.151  | -0.815 | -2.718 | -1.874 | -3.581 | -2.698 |    |
| Olfr771       | 0.036 | 2.293 | 1.053  | 0.907  | 1.719  | 0.532  | -1.240 | -0.824 | -2.520 | -0.375 |    |
| Mreg          | 0.007 | 2.290 | 1.679  | 2.105  | 1.135  | 1.797  | -0.611 | -1.278 | -0.180 | -0.374 | Up |
| Grik2         | 0.014 | 2.288 | 0.906  | 1.530  | 0.071  | 1.117  | -1.382 | -1.410 | -0.805 | -1.931 |    |
| Crp           | 0.005 | 2.278 | 1.901  | 2.191  | 1.959  | 1.552  | -0.377 | -1.021 | -0.355 | 0.246  |    |
| Irs4          | 0.013 | 2.277 | 1.466  | 2.061  | 0.481  | 1.856  | -0.811 | -0.776 | -1.181 | -0.475 |    |
| 41709.00      | 0.048 | 2.275 | 0.711  | 0.645  | 0.543  | 0.945  | -1.564 | -1.638 | -2.911 | -0.144 |    |
| Enpp1         | 0.017 | 2.265 | 1.509  | 1.531  | 1.670  | 1.327  | -0.755 | -0.417 | 0.013  | -1.863 |    |
| Gstt1         | 0.017 | 2.264 | -1.016 | -1.099 | -0.435 | -1.515 | -3.280 | -2.430 | -3.298 | -4.113 | Up |
| Nefm          | 0.016 | 2.261 | 3.069  | 3.105  | 2.185  | 3.918  | 0.809  | 0.538  | 1.324  | 0.564  | Up |
| Smagp         | 0.044 | 2.259 | -1.084 | -0.395 | -0.692 | -2.164 | -3.343 | -2.236 | -3.838 | -3.956 |    |
| Gm2016        | 0.031 | 2.254 | -1.182 | -1.581 | -0.901 | -1.062 | -3.435 | -2.341 | -3.351 | -4.614 |    |
| Fam49a        | 0.019 | 2.253 | -0.964 | -0.676 | -0.588 | -1.627 | -3.217 | -3.012 | -4.144 | -2.496 |    |
| Fgfr3         | 0.011 | 2.250 | -0.039 | 0.548  | -0.466 | -0.197 | -2.288 | -2.709 | -2.682 | -1.473 |    |
| Col4a5        | 0.003 | 2.227 | 0.765  | 0.942  | 1.039  | 0.315  | -1.462 | -1.981 | -1.244 | -1.162 | Up |
| Amdhd2        | 0.010 | 2.224 | -0.239 | 0.065  | 0.269  | -1.052 | -2.464 | -1.968 | -2.598 | -2.825 |    |
| Prcp          | 0.026 | 2.223 | -0.096 | 0.144  | 0.543  | -0.975 | -2.319 | -3.130 | -1.563 | -2.265 | Up |
| Gm10409       | 0.024 | 2.218 | -1.200 | -1.423 | -1.830 | -0.348 | -3.418 | -2.551 | -3.647 | -4.056 |    |
| Myo5b         | 0.000 | 2.217 | 1.691  | 1.873  | 1.776  | 1.424  | -0.526 | -0.256 | -0.658 | -0.666 | Up |
| Frat2         | 0.001 | 2.214 | 1.189  | 1.519  | 1.308  | 0.740  | -1.025 | -0.968 | -1.147 | -0.959 |    |
| Gm3020        | 0.023 | 2.214 | -1.189 | -1.428 | -1.811 | -0.327 | -3.402 | -2.587 | -3.621 | -4.000 |    |
| Gm609         | 0.001 | 2.213 | 2.912  | 3.131  | 2.492  | 3.112  | 0.699  | 1.078  | 0.467  | 0.550  | Up |
| Sdc1          | 0.020 | 2.213 | 0.318  | 0.520  | 1.174  | -0.740 | -1.895 | -2.279 | -1.775 | -1.630 |    |
| Col9a1        | 0.014 | 2.210 | -0.680 | -0.577 | -0.145 | -1.318 | -2.890 | -2.111 | -3.464 | -3.096 |    |
| Zak           | 0.003 | 2.202 | 1.415  | 1.168  | 1.633  | 1.444  | -0.786 | -0.245 | -1.345 | -0.769 |    |
| 5730522E02Rik | 0.040 | 2.198 | 1.247  | 1.142  | 1.238  | 1.361  | -0.951 | 0.013  | -0.489 | -2.376 |    |
| Cd1d1         | 0.000 | 2.185 | 1.966  | 1.854  | 2.332  | 1.713  | -0.219 | -0.314 | -0.169 | -0.173 |    |
| Chrdl1        | 0.007 | 2.179 | -0.949 | -0.942 | -0.338 | -1.567 | -3.128 | -3.518 | -3.213 | -2.652 |    |
| Gm3002        | 0.023 | 2.172 | -0.478 | -1.099 | -0.655 | 0.320  | -2.650 | -1.974 | -2.499 | -3.477 |    |
| Dek           | 0.009 | 2.157 | 6.707  | 6.494  | 7.490  | 6.136  | 4.550  | 4.193  | 4.581  | 4.875  |    |
| Fblim1        | 0.028 | 2.149 | 0.053  | 0.377  | -0.311 | 0.093  | -2.095 | -1.392 | -1.588 | -3.306 |    |
| Tbl3          | 0.001 | 2.145 | -0.747 | -0.649 | -0.446 | -1.145 | -2.892 | -2.709 | -3.155 | -2.813 |    |
| Cnksr2        | 0.017 | 2.138 | -0.777 | -0.469 | -0.751 | -1.111 | -2.916 | -3.080 | -3.713 | -1.954 |    |
| Mcm3          | 0.028 | 2.128 | 0.507  | 0.823  | 1.319  | -0.622 | -1.621 | -2.033 | -1.664 | -1.168 |    |
| Trim59        | 0.002 | 2.122 | 2.892  | 3.281  | 2.829  | 2.565  | 0.769  | 0.652  | 1.122  | 0.534  |    |
| Hhex          | 0.001 | 2.120 | 2.472  | 2.751  | 2.136  | 2.530  | 0.352  | 0.215  | 0.556  | 0.286  |    |
| Fbxl21        | 0.012 | 2.113 | -1.039 | -1.773 | -0.640 | -0.705 | -3.152 | -2.745 | -2.920 | -3.792 |    |
| Cav2          | 0.010 | 2.106 | -0.450 | 0.177  | -0.341 | -1.187 | -2.556 | -2.226 | -2.445 | -2.998 |    |
| Gm3164        | 0.005 | 2.100 | -0.110 | -0.185 | -0.677 | 0.533  | -2.210 | -2.302 | -2.006 | -2.323 |    |
| Cer1          | 0.006 | 2.095 | 2.158  | 2.685  | 1.513  | 2.277  | 0.063  | 0.039  | -0.271 | 0.423  |    |
| Tmem44        | 0.036 | 2.089 | -0.968 | -0.583 | -1.335 | -0.987 | -3.057 | -2.371 | -4.329 | -2.471 |    |
| Fzd5          | 0.010 | 2.088 | 0.456  | 0.472  | 0.885  | 0.011  | -1.632 | -1.893 | -2.116 | -0.887 |    |
| Neat1         | 0.001 | 2.086 | 2.115  | 2.407  | 1.943  | 1.994  | 0.029  | -0.181 | -0.204 | 0.471  | Up |
| Zfp820        | 0.002 | 2.080 | -0.661 | -0.639 | -0.820 | -0.525 | -2.741 | -3.252 | -2.685 | -2.287 |    |
| Gpx2          | 0.010 | 2.075 | 3.789  | 3.883  | 3.265  | 4.220  | 1.714  | 2.413  | 1.416  | 1.312  |    |
| Gm3667        | 0.019 | 2.064 | -0.886 | -1.116 | -1.266 | -0.275 | -2.950 | -2.071 | -3.241 | -3.537 |    |
| Gm3488        | 0.016 | 2.060 | -1.221 | -1.306 | -2.017 | -0.340 | -3.281 | -3.334 | -2.984 | -3.524 |    |
| Grhl2         | 0.020 | 2.054 | 0.299  | 0.282  | 1.065  | -0.449 | -1.754 | -1.866 | -1.143 | -2.253 |    |
| 2810429I04Rik | 0.020 | 2.039 | -1.117 | -1.337 | -0.541 | -1.472 | -3.155 | -2.309 | -3.888 | -3.270 |    |
| Smtnl2        | 0.039 | 2.038 | 0.460  | 1.115  | 1.117  | -0.851 | -1.578 | -1.888 | -1.352 | -1.494 |    |
| Speer4d       | 0.019 | 2.014 | -0.318 | 0.123  | -0.575 | -0.503 | -2.332 | -1.506 | -2.318 | -3.172 |    |
| Fmo2          | 0.019 | 2.009 | 1.505  | 1.366  | 2.353  | 0.796  | -0.504 | -0.206 | -0.251 | -1.055 |    |
| Fjx1          | 0.041 | 2.000 | 0.150  | 0.413  | 0.433  | -0.394 | -1.849 | -3.082 | -1.174 | -1.291 |    |
| Gm10352       | 0.041 | 1.998 | -1.651 | -0.970 | -2.701 | -1.282 | -3.650 | -2.833 | -4.035 | -4.082 |    |
| Ptprk         | 0.004 | 1.988 | 2.314  | 2.590  | 2.355  | 1.995  | 0.326  | -0.251 | 0.731  | 0.497  | Up |



|               |       |       |        |        |        |        |        |        |        |        |      |
|---------------|-------|-------|--------|--------|--------|--------|--------|--------|--------|--------|------|
| Cd4           | 0.042 | 1.987 | -1.547 | -0.759 | -1.139 | -2.745 | -3.535 | -2.994 | -4.003 | -3.606 |      |
| Gm3696        | 0.015 | 1.978 | -0.207 | -0.350 | -0.821 | 0.550  | -2.185 | -2.040 | -2.703 | -1.813 |      |
| Gast          | 0.014 | 1.978 | 2.241  | 2.763  | 1.437  | 2.523  | 0.263  | 0.088  | 0.749  | -0.047 | Up   |
| Nab1          | 0.026 | 1.977 | 2.060  | 2.346  | 2.384  | 1.450  | 0.083  | 0.295  | -0.846 | 0.799  | Down |
| Nfib          | 0.021 | 1.973 | 1.907  | 1.903  | 2.819  | 0.999  | -0.066 | -0.173 | 0.099  | -0.123 |      |
| Ctsh          | 0.030 | 1.963 | 2.083  | 2.795  | 2.539  | 0.914  | 0.119  | 0.176  | 0.186  | -0.004 | Up   |
| Rai14         | 0.012 | 1.959 | 0.281  | 0.459  | 0.702  | -0.318 | -1.678 | -2.318 | -1.250 | -1.467 |      |
| Dock1         | 0.013 | 1.957 | 0.100  | 0.257  | 0.644  | -0.602 | -1.857 | -2.396 | -1.732 | -1.443 | Up   |
| Slc25a13      | 0.029 | 1.955 | -0.137 | -0.726 | 0.510  | -0.195 | -2.092 | -1.897 | -2.983 | -1.396 | Up   |
| Il1rap        | 0.002 | 1.951 | 0.653  | 1.040  | 0.511  | 0.410  | -1.298 | -1.155 | -1.621 | -1.118 |      |
| Tead3         | 0.016 | 1.950 | 0.201  | -0.524 | 0.576  | 0.553  | -1.749 | -1.363 | -2.382 | -1.502 |      |
| 2610307P16Rik | 0.001 | 1.947 | 1.943  | 2.292  | 1.704  | 1.834  | -0.003 | 0.196  | -0.015 | -0.191 |      |
| Arl4c         | 0.045 | 1.947 | 1.730  | 2.173  | 1.959  | 1.057  | -0.217 | -0.737 | -0.857 | 0.943  |      |
| Pdk3          | 0.016 | 1.946 | 3.427  | 4.032  | 2.897  | 3.353  | 1.481  | 1.259  | 1.000  | 2.185  |      |
| Mia           | 0.014 | 1.944 | 3.221  | 3.337  | 3.602  | 2.724  | 1.277  | 1.056  | 0.754  | 2.020  |      |
| Swap70        | 0.019 | 1.936 | 0.096  | 0.480  | 0.542  | -0.734 | -1.840 | -2.105 | -1.256 | -2.158 |      |
| Gpx8          | 0.032 | 1.929 | 0.671  | 0.236  | 1.476  | 0.300  | -1.258 | -1.133 | -0.566 | -2.076 |      |
| Sox4          | 0.004 | 1.928 | 3.371  | 3.796  | 3.025  | 3.293  | 1.443  | 1.020  | 1.574  | 1.736  | Up   |
| Tiparp        | 0.028 | 1.926 | 2.870  | 3.149  | 2.438  | 3.024  | 0.945  | 0.124  | 1.937  | 0.773  |      |
| 1110034G24Rik | 0.016 | 1.919 | -0.551 | -1.415 | 0.174  | -0.411 | -2.469 | -2.699 | -2.307 | -2.402 |      |
| Gm3629        | 0.009 | 1.915 | 0.112  | -0.612 | 0.373  | 0.574  | -1.804 | -2.027 | -1.907 | -1.477 |      |
| Gm15900       | 0.013 | 1.915 | -0.104 | -0.773 | 0.271  | 0.191  | -2.019 | -2.301 | -2.319 | -1.436 |      |
| Gm3239        | 0.026 | 1.913 | -0.548 | -1.067 | -0.694 | 0.116  | -2.460 | -1.608 | -2.971 | -2.803 |      |
| Hmga2         | 0.008 | 1.912 | 2.519  | 2.608  | 3.150  | 1.800  | 0.607  | 0.713  | 0.552  | 0.558  |      |
| Stard8        | 0.040 | 1.907 | 0.305  | 0.991  | 0.740  | -0.816 | -1.602 | -2.115 | -1.571 | -1.119 | Up   |
| Rps26-ps1     | 0.012 | 1.902 | 2.564  | 2.397  | 3.318  | 1.978  | 0.662  | 0.417  | 0.536  | 1.033  |      |
| Zwilch        | 0.038 | 1.900 | 1.129  | 1.399  | 1.853  | 0.136  | -0.771 | -1.134 | -0.074 | -1.105 | Down |
| Dusp1         | 0.022 | 1.879 | 2.907  | 3.568  | 2.648  | 2.505  | 1.029  | 0.611  | 0.659  | 1.816  | Up   |
| Sun2          | 0.003 | 1.874 | 2.336  | 2.682  | 2.353  | 1.972  | 0.462  | 0.044  | 0.659  | 0.683  |      |
| Parp9         | 0.033 | 1.872 | -0.054 | 0.532  | -0.279 | -0.414 | -1.926 | -2.045 | -2.731 | -1.001 |      |
| Gm3526        | 0.026 | 1.872 | -1.083 | -1.647 | -1.383 | -0.218 | -2.955 | -2.671 | -2.614 | -3.580 |      |
| Pamr1         | 0.013 | 1.872 | 1.889  | 2.027  | 2.395  | 1.246  | 0.018  | 0.195  | -0.530 | 0.389  | Up   |
| Gm15101       | 0.026 | 1.867 | -1.119 | -1.278 | -0.838 | -1.242 | -2.986 | -2.351 | -2.583 | -4.023 |      |
| Avpr1b        | 0.028 | 1.866 | -0.412 | -0.209 | -1.148 | 0.121  | -2.279 | -2.867 | -2.452 | -1.517 |      |
| Dock10        | 0.049 | 1.861 | -0.128 | 0.301  | 0.662  | -1.347 | -1.989 | -2.278 | -2.196 | -1.493 |      |
| Igsf3         | 0.011 | 1.857 | 0.144  | 0.520  | 0.583  | -0.672 | -1.714 | -1.536 | -1.805 | -1.800 |      |
| Dock4         | 0.017 | 1.841 | -0.805 | -0.228 | -1.235 | -0.952 | -2.646 | -2.023 | -2.636 | -3.280 |      |
| Rassf1        | 0.030 | 1.838 | -0.447 | 0.155  | -0.444 | -1.052 | -2.285 | -1.436 | -2.866 | -2.551 | Up   |
| Tmem200a      | 0.048 | 1.837 | -0.431 | 0.129  | -1.463 | 0.043  | -2.267 | -3.054 | -1.782 | -1.966 |      |
| Olfir329-ps   | 0.023 | 1.831 | -1.128 | -1.444 | -1.045 | -0.896 | -2.960 | -2.033 | -3.655 | -3.191 |      |
| Zfp286        | 0.017 | 1.829 | 0.334  | 1.030  | -0.216 | 0.188  | -1.495 | -2.056 | -1.232 | -1.197 |      |
| Bcl11a        | 0.005 | 1.817 | 1.404  | 1.545  | 0.944  | 1.724  | -0.413 | -0.115 | -0.260 | -0.863 |      |
| Igdcc4        | 0.004 | 1.816 | -0.376 | -0.598 | -0.166 | -0.363 | -2.192 | -2.262 | -2.617 | -1.697 | Up   |
| Mcm7          | 0.021 | 1.814 | 3.399  | 3.495  | 4.079  | 2.623  | 1.585  | 1.542  | 2.027  | 1.187  |      |
| Gm3095        | 0.029 | 1.799 | -0.353 | -0.887 | -0.519 | 0.349  | -2.152 | -1.367 | -2.496 | -2.593 |      |
| Rassf2        | 0.020 | 1.789 | -0.518 | 0.253  | -0.504 | -1.302 | -2.307 | -2.478 | -2.477 | -1.966 | Up   |
| Ezh2          | 0.003 | 1.781 | 4.828  | 4.731  | 5.282  | 4.470  | 3.047  | 3.202  | 2.806  | 3.132  |      |
| Nepn          | 0.002 | 1.776 | -0.147 | -0.382 | -0.087 | 0.027  | -1.923 | -2.363 | -1.644 | -1.761 |      |
| Gm22346       | 0.014 | 1.768 | 4.212  | 4.673  | 4.132  | 3.830  | 2.443  | 1.753  | 2.735  | 2.841  |      |
| F2r           | 0.037 | 1.767 | 1.461  | 2.088  | 0.859  | 1.436  | -0.306 | -1.134 | 0.406  | -0.191 | Up   |
| Zfp69         | 0.001 | 1.767 | -0.882 | -0.829 | -0.900 | -0.919 | -2.649 | -2.871 | -2.795 | -2.281 | Up   |
| Osbpl7        | 0.024 | 1.761 | 1.281  | 0.916  | 1.468  | 1.458  | -0.481 | -1.212 | 0.374  | -0.604 |      |
| BC067074      | 0.001 | 1.752 | 0.527  | 0.674  | 0.190  | 0.716  | -1.225 | -1.332 | -1.057 | -1.286 |      |
| Prdm9         | 0.021 | 1.751 | 1.222  | 1.553  | 1.174  | 0.939  | -0.529 | 0.059  | -0.262 | -1.385 |      |
| Yy2           | 0.004 | 1.749 | 0.849  | 1.080  | 1.038  | 0.430  | -0.900 | -0.551 | -1.269 | -0.879 |      |
| Ncapg         | 0.021 | 1.742 | 1.641  | 1.577  | 2.467  | 0.878  | -0.102 | -0.339 | 0.043  | -0.010 |      |

|               |       |       |        |        |        |        |        |        |        |        |      |
|---------------|-------|-------|--------|--------|--------|--------|--------|--------|--------|--------|------|
| Fmn1          | 0.014 | 1.741 | -0.054 | 0.085  | 0.436  | -0.685 | -1.795 | -2.139 | -1.296 | -1.951 | Up   |
| Spred1        | 0.010 | 1.736 | 1.767  | 2.065  | 1.923  | 1.313  | 0.031  | -0.323 | -0.200 | 0.616  | Up   |
| Prc1          | 0.029 | 1.735 | 3.056  | 2.821  | 3.803  | 2.544  | 1.321  | 1.925  | 0.713  | 1.326  |      |
| Nrp1          | 0.034 | 1.735 | 0.496  | 0.980  | 1.042  | -0.533 | -1.238 | -1.599 | -1.019 | -1.097 |      |
| Rfc4          | 0.035 | 1.732 | 2.047  | 1.905  | 2.867  | 1.370  | 0.315  | 0.773  | 0.520  | -0.347 |      |
| Fam110a       | 0.022 | 1.732 | -0.586 | -0.301 | -1.308 | -0.149 | -2.317 | -1.972 | -2.931 | -2.049 | Up   |
| Rab11fip4     | 0.001 | 1.729 | -0.539 | -0.432 | -0.548 | -0.636 | -2.268 | -2.355 | -2.581 | -1.868 | Up   |
| Pip4k2a       | 0.004 | 1.729 | 2.605  | 2.872  | 2.779  | 2.166  | 0.876  | 0.706  | 1.255  | 0.667  | Up   |
| Gm3591        | 0.024 | 1.724 | -0.706 | -0.826 | -1.440 | 0.149  | -2.430 | -2.304 | -2.262 | -2.724 |      |
| Rpl26         | 0.007 | 1.720 | 5.027  | 4.706  | 5.520  | 4.855  | 3.307  | 2.912  | 3.324  | 3.686  | Up   |
| Gm8113        | 0.002 | 1.711 | 2.340  | 2.458  | 2.299  | 2.263  | 0.629  | 0.169  | 0.868  | 0.849  | Up   |
| Gm26880       | 0.002 | 1.700 | 3.879  | 4.272  | 3.921  | 3.444  | 2.179  | 2.165  | 2.170  | 2.202  |      |
| Gm13160       | 0.025 | 1.699 | 0.439  | 0.632  | 1.139  | -0.453 | -1.260 | -1.037 | -1.502 | -1.241 |      |
| 2410006H16Rik | 0.048 | 1.695 | 2.936  | 2.777  | 3.217  | 2.816  | 1.242  | 0.077  | 1.781  | 1.868  |      |
| Igsf9         | 0.008 | 1.686 | 0.260  | 0.500  | -0.242 | 0.523  | -1.426 | -1.116 | -1.899 | -1.263 | Up   |
| Snrbp         | 0.049 | 1.672 | 1.272  | 1.325  | 1.276  | 1.214  | -0.400 | -1.598 | 0.211  | 0.186  |      |
| Flna          | 0.041 | 1.670 | 2.001  | 2.007  | 2.337  | 1.659  | 0.330  | -0.456 | 0.122  | 1.324  |      |
| Rin2          | 0.032 | 1.669 | 0.921  | 1.462  | 1.227  | 0.073  | -0.748 | -0.711 | -1.259 | -0.275 | Up   |
| 5330417C22Rik | 0.001 | 1.658 | 3.186  | 3.368  | 3.221  | 2.970  | 1.528  | 1.286  | 1.717  | 1.582  |      |
| Rccd1         | 0.048 | 1.655 | 0.965  | 1.503  | 0.222  | 1.170  | -0.691 | -1.165 | -1.111 | 0.204  |      |
| Tex30         | 0.009 | 1.655 | 3.291  | 3.367  | 3.654  | 2.850  | 1.636  | 1.169  | 1.660  | 2.078  |      |
| Ptgfrn        | 0.011 | 1.654 | -0.190 | -0.088 | 0.174  | -0.657 | -1.844 | -2.375 | -1.464 | -1.693 |      |
| 2610035D17Rik | 0.029 | 1.650 | 0.511  | 0.756  | 0.314  | 0.463  | -1.140 | -0.227 | -1.829 | -1.364 |      |
| Egr1          | 0.004 | 1.650 | 5.643  | 5.866  | 5.659  | 5.405  | 3.993  | 3.572  | 4.380  | 4.028  |      |
| Acsl1         | 0.038 | 1.639 | 1.236  | 1.207  | 0.754  | 1.747  | -0.403 | -0.402 | 0.384  | -1.190 |      |
| Snn           | 0.018 | 1.637 | 1.355  | 1.800  | 0.996  | 1.270  | -0.282 | -0.986 | 0.154  | -0.014 |      |
| Wsb1          | 0.001 | 1.636 | 5.199  | 5.421  | 5.006  | 5.169  | 3.562  | 3.293  | 3.608  | 3.786  |      |
| Arhgap42      | 0.004 | 1.630 | 0.190  | 0.509  | 0.129  | -0.069 | -1.441 | -1.770 | -1.016 | -1.536 |      |
| Frmd6         | 0.031 | 1.620 | -0.778 | -0.596 | -0.678 | -1.060 | -2.398 | -1.889 | -3.343 | -1.962 | Up   |
| Gm2237        | 0.043 | 1.619 | -0.322 | -0.247 | -1.009 | 0.291  | -1.940 | -2.049 | -1.192 | -2.580 |      |
| Rap2b         | 0.015 | 1.617 | 0.213  | 0.504  | 0.329  | -0.193 | -1.404 | -1.084 | -1.062 | -2.067 |      |
| Klf2          | 0.038 | 1.611 | -0.960 | -0.269 | -1.205 | -1.407 | -2.571 | -1.797 | -2.815 | -3.102 |      |
| Ccng2         | 0.003 | 1.609 | 2.462  | 2.724  | 2.208  | 2.453  | 0.853  | 0.621  | 0.683  | 1.253  |      |
| Bzw2          | 0.014 | 1.604 | 1.463  | 1.596  | 2.010  | 0.783  | -0.140 | 0.109  | -0.324 | -0.207 |      |
| Serpini1      | 0.008 | 1.603 | 3.054  | 3.245  | 2.561  | 3.356  | 1.451  | 1.064  | 1.765  | 1.525  |      |
| Zfp626        | 0.007 | 1.602 | 0.791  | 0.353  | 1.134  | 0.886  | -0.811 | -1.204 | -0.737 | -0.492 |      |
| Hmgn5         | 0.005 | 1.596 | 5.374  | 5.202  | 5.844  | 5.075  | 3.778  | 3.490  | 3.943  | 3.901  |      |
| Gm26137       | 0.015 | 1.590 | 3.966  | 3.936  | 4.132  | 3.830  | 2.376  | 1.753  | 2.320  | 3.054  |      |
| Galnt3        | 0.032 | 1.589 | -0.499 | -0.048 | -0.185 | -1.265 | -2.088 | -1.492 | -2.239 | -2.534 |      |
| Aif1l         | 0.019 | 1.582 | -1.217 | -1.008 | -1.082 | -1.560 | -2.799 | -3.414 | -2.112 | -2.871 |      |
| Rapgef5       | 0.037 | 1.576 | -1.149 | -0.874 | -0.441 | -2.132 | -2.725 | -2.716 | -2.608 | -2.851 |      |
| Rpl36a        | 0.039 | 1.574 | 7.898  | 7.932  | 8.546  | 7.217  | 6.324  | 5.623  | 6.658  | 6.692  |      |
| Pcna          | 0.021 | 1.573 | 4.500  | 4.672  | 5.023  | 3.805  | 2.927  | 2.562  | 3.352  | 2.866  |      |
| Gm3636        | 0.012 | 1.571 | 0.383  | 0.620  | -0.313 | 0.842  | -1.188 | -1.298 | -1.126 | -1.140 |      |
| Dok2          | 0.005 | 1.570 | 0.264  | 0.382  | 0.084  | 0.325  | -1.306 | -1.831 | -1.115 | -0.973 |      |
| Lpar6         | 0.007 | 1.569 | 1.569  | 2.017  | 1.290  | 1.400  | 0.000  | 0.092  | 0.305  | -0.397 | Up   |
| Axdnd1        | 0.038 | 1.565 | 0.377  | 1.028  | 0.657  | -0.553 | -1.188 | -1.271 | -0.836 | -1.456 |      |
| Clu           | 0.036 | 1.563 | 2.058  | 2.037  | 2.768  | 1.369  | 0.495  | -0.094 | 0.707  | 0.874  | Down |
| Sparc         | 0.025 | 1.559 | 4.343  | 4.591  | 4.810  | 3.629  | 2.784  | 2.308  | 2.863  | 3.183  |      |
| Pla2g12a      | 0.003 | 1.556 | 0.082  | 0.268  | 0.170  | -0.191 | -1.474 | -1.108 | -1.748 | -1.565 |      |
| Gm14393       | 0.022 | 1.554 | 0.154  | -0.366 | 0.146  | 0.683  | -1.400 | -1.788 | -1.610 | -0.801 |      |
| 2610042L04Rik | 0.020 | 1.552 | -1.439 | -1.893 | -1.741 | -0.683 | -2.990 | -3.168 | -2.657 | -3.147 |      |
| Plk2          | 0.046 | 1.551 | 2.524  | 2.553  | 2.911  | 2.108  | 0.973  | 0.069  | 1.092  | 1.757  |      |
| Smarcd2       | 0.031 | 1.550 | 4.028  | 4.554  | 3.568  | 3.961  | 2.478  | 1.842  | 3.150  | 2.441  |      |
| Slco2a1       | 0.013 | 1.549 | -0.670 | -0.293 | -1.152 | -0.564 | -2.218 | -2.286 | -2.626 | -1.743 | Up   |
| Zfp870        | 0.020 | 1.547 | -0.539 | -0.318 | -0.903 | -0.397 | -2.086 | -1.749 | -2.819 | -1.691 | Up   |

|               |       |       |        |        |        |        |        |        |        |        |      |
|---------------|-------|-------|--------|--------|--------|--------|--------|--------|--------|--------|------|
| Mex3a         | 0.012 | 1.545 | 0.956  | 1.583  | 0.512  | 0.773  | -0.589 | -0.648 | -0.788 | -0.332 |      |
| Gm13237       | 0.033 | 1.531 | 0.890  | 0.825  | 1.573  | 0.272  | -0.641 | -1.230 | -0.339 | -0.354 |      |
| Grin2c        | 0.049 | 1.531 | -0.293 | 0.381  | -1.120 | -0.140 | -1.823 | -1.961 | -2.301 | -1.209 | Up   |
| Plin2         | 0.046 | 1.529 | 1.837  | 2.425  | 2.121  | 0.966  | 0.309  | 0.897  | -0.081 | 0.110  | Up   |
| Zik1          | 0.016 | 1.528 | -0.190 | 0.258  | -0.601 | -0.228 | -1.719 | -2.167 | -1.185 | -1.804 | Down |
| Tpm4          | 0.009 | 1.528 | 5.210  | 5.379  | 5.176  | 5.077  | 3.683  | 3.071  | 4.030  | 3.947  |      |
| Pcdhb22       | 0.015 | 1.527 | -0.203 | 0.169  | -0.359 | -0.420 | -1.730 | -1.772 | -2.266 | -1.152 |      |
| Hdac11        | 0.009 | 1.525 | -0.567 | -0.482 | -0.147 | -1.073 | -2.092 | -1.738 | -2.316 | -2.222 |      |
| Mal2          | 0.038 | 1.523 | 1.664  | 1.573  | 2.326  | 1.091  | 0.140  | -0.529 | 0.308  | 0.641  |      |
| Tcf3          | 0.027 | 1.519 | -0.379 | -0.087 | -0.506 | -0.544 | -1.897 | -2.526 | -2.070 | -1.097 | Up   |
| Lrrn3         | 0.017 | 1.515 | -0.740 | -0.725 | -0.875 | -0.622 | -2.256 | -1.658 | -2.146 | -2.963 |      |
| Fosb          | 0.007 | 1.511 | 3.142  | 3.230  | 3.270  | 2.927  | 1.631  | 1.118  | 1.704  | 2.073  | Up   |
| Oas3          | 0.044 | 1.507 | 0.258  | 0.718  | -0.231 | 0.286  | -1.249 | -0.365 | -1.722 | -1.660 |      |
| Lpin2         | 0.012 | 1.506 | 2.258  | 2.878  | 1.854  | 2.043  | 0.752  | 0.529  | 1.025  | 0.702  | Up   |
| Cyp39a1       | 0.046 | 1.506 | 0.485  | 0.578  | 0.318  | 0.559  | -1.021 | -1.858 | -1.139 | -0.067 | Up   |
| Sox6          | 0.003 | 1.499 | 0.740  | 1.104  | 0.701  | 0.416  | -0.759 | -0.995 | -0.737 | -0.543 | Up   |
| Hilpda        | 0.025 | 1.499 | 2.070  | 2.376  | 2.080  | 1.755  | 0.572  | -0.178 | 0.776  | 1.116  | Up   |
| Ntn4          | 0.020 | 1.497 | 1.598  | 1.730  | 1.773  | 1.292  | 0.101  | -0.579 | 0.698  | 0.184  | Up   |
| Fbxo30        | 0.015 | 1.490 | 2.659  | 2.959  | 2.425  | 2.593  | 1.169  | 0.718  | 1.807  | 0.980  | Up   |
| Pola1         | 0.003 | 1.488 | 3.353  | 3.378  | 3.534  | 3.147  | 1.865  | 1.544  | 1.792  | 2.257  |      |
| Pycard        | 0.009 | 1.487 | -1.157 | -0.813 | -0.971 | -1.687 | -2.644 | -2.926 | -2.359 | -2.646 |      |
| Atp11c        | 0.016 | 1.482 | 0.484  | 0.368  | 1.173  | -0.090 | -0.999 | -0.998 | -0.944 | -1.054 |      |
| Trp53inp1     | 0.006 | 1.479 | 3.804  | 4.127  | 3.258  | 4.026  | 2.324  | 2.259  | 2.434  | 2.280  | Up   |
| Erbp3         | 0.022 | 1.477 | 0.178  | 0.551  | 0.223  | -0.238 | -1.298 | -1.182 | -1.932 | -0.782 | Up   |
| Rpl36a-ps1    | 0.011 | 1.476 | 3.950  | 3.935  | 4.458  | 3.457  | 2.473  | 2.189  | 2.478  | 2.753  |      |
| Rab8b         | 0.047 | 1.475 | 1.922  | 2.350  | 2.525  | 0.892  | 0.447  | 0.419  | 0.389  | 0.535  |      |
| Prps2         | 0.037 | 1.471 | 2.673  | 2.826  | 3.394  | 1.801  | 1.202  | 1.027  | 1.207  | 1.374  |      |
| Tcf7l2        | 0.006 | 1.471 | 2.092  | 2.333  | 2.047  | 1.896  | 0.621  | 0.390  | 0.365  | 1.109  | Up   |
| Lgr4          | 0.021 | 1.470 | 1.864  | 1.781  | 2.445  | 1.366  | 0.395  | 0.036  | 0.295  | 0.852  | Up   |
| Nxph1         | 0.042 | 1.467 | 0.412  | 0.327  | 0.065  | 0.844  | -1.055 | -0.331 | -1.861 | -0.972 |      |
| Gm2824        | 0.030 | 1.466 | -1.501 | -1.663 | -1.010 | -1.831 | -2.968 | -2.304 | -3.566 | -3.033 |      |
| Rpl35a-ps2    | 0.023 | 1.457 | 4.130  | 4.045  | 4.686  | 3.659  | 2.674  | 2.146  | 2.807  | 3.068  |      |
| Rpl35a-ps3    | 0.023 | 1.457 | 4.130  | 4.045  | 4.686  | 3.659  | 2.674  | 2.146  | 2.807  | 3.068  |      |
| Rpl35a-ps4    | 0.023 | 1.457 | 4.130  | 4.045  | 4.686  | 3.659  | 2.674  | 2.146  | 2.807  | 3.068  |      |
| Rpl35a-ps6    | 0.023 | 1.457 | 4.130  | 4.045  | 4.686  | 3.659  | 2.674  | 2.146  | 2.807  | 3.068  |      |
| Gm10243       | 0.023 | 1.457 | 4.130  | 4.045  | 4.686  | 3.659  | 2.674  | 2.146  | 2.807  | 3.068  |      |
| Zfp184        | 0.038 | 1.450 | 0.938  | 1.561  | 0.089  | 1.163  | -0.512 | -0.665 | -0.726 | -0.147 |      |
| C230081A13Rik | 0.042 | 1.433 | 0.086  | 0.484  | 0.394  | -0.619 | -1.347 | -1.313 | -0.787 | -1.940 |      |
| Trib1         | 0.010 | 1.432 | 2.189  | 2.599  | 2.072  | 1.895  | 0.757  | 0.445  | 1.210  | 0.615  | Up   |
| Lhfpl2        | 0.006 | 1.427 | 0.494  | 0.876  | 0.074  | 0.531  | -0.933 | -0.672 | -0.979 | -1.148 |      |
| Rps23-ps      | 0.009 | 1.424 | 4.698  | 4.897  | 4.914  | 4.281  | 3.273  | 3.130  | 3.695  | 2.994  |      |
| Zfp940        | 0.035 | 1.422 | 1.808  | 1.085  | 1.781  | 2.558  | 0.386  | 0.207  | 0.706  | 0.246  |      |
| Sass6         | 0.028 | 1.421 | 0.619  | 0.925  | 0.864  | 0.069  | -0.802 | -0.182 | -1.254 | -0.970 |      |
| Arhgef10l     | 0.031 | 1.420 | 0.075  | 0.168  | -0.134 | 0.190  | -1.346 | -2.176 | -1.053 | -0.808 | Up   |
| Camk2d        | 0.042 | 1.419 | 1.157  | 1.386  | 1.531  | 0.553  | -0.262 | -0.214 | -0.929 | 0.355  | Up   |
| Hmgb3         | 0.007 | 1.417 | 4.204  | 4.206  | 4.402  | 4.003  | 2.786  | 2.289  | 2.968  | 3.102  |      |
| Supt4a        | 0.009 | 1.413 | 4.503  | 4.860  | 4.296  | 4.354  | 3.090  | 2.688  | 3.493  | 3.089  |      |
| Gm24617       | 0.048 | 1.413 | 4.104  | 4.351  | 4.132  | 3.830  | 2.691  | 1.753  | 3.320  | 2.999  |      |
| Klhl24        | 0.022 | 1.412 | 2.943  | 3.361  | 2.259  | 3.209  | 1.531  | 1.176  | 1.772  | 1.646  |      |
| Bend5         | 0.026 | 1.409 | 1.105  | 1.474  | 0.783  | 1.058  | -0.304 | -0.997 | -0.106 | 0.191  | Up   |
| Btg2          | 0.005 | 1.399 | 4.480  | 4.785  | 4.099  | 4.556  | 3.080  | 2.768  | 3.190  | 3.284  | Up   |
| Casp6         | 0.019 | 1.396 | 0.947  | 1.318  | 0.741  | 0.782  | -0.449 | -0.987 | -0.461 | 0.100  | Up   |
| Peli2         | 0.023 | 1.394 | -0.046 | 0.173  | -0.231 | -0.081 | -1.440 | -2.169 | -0.991 | -1.161 |      |
| Amer1         | 0.005 | 1.391 | 0.949  | 1.206  | 1.048  | 0.594  | -0.441 | -0.771 | -0.385 | -0.169 |      |
| Pnrc2         | 0.021 | 1.385 | 5.182  | 5.674  | 5.253  | 4.620  | 3.798  | 3.432  | 3.771  | 4.190  |      |
| Brca2         | 0.019 | 1.382 | 0.336  | 0.155  | 0.880  | -0.026 | -1.045 | -0.995 | -1.482 | -0.659 |      |



|               |       |       |        |        |        |        |        |        |        |        |      |
|---------------|-------|-------|--------|--------|--------|--------|--------|--------|--------|--------|------|
| Top3a         | 0.043 | 1.372 | 0.194  | 0.380  | 0.432  | -0.229 | -1.178 | -2.012 | -0.697 | -0.826 |      |
| Tpm3-rs7      | 0.001 | 1.371 | 2.501  | 2.618  | 2.489  | 2.395  | 1.129  | 0.854  | 1.365  | 1.169  |      |
| Rps12l1       | 0.045 | 1.370 | 3.624  | 3.706  | 4.092  | 3.075  | 2.254  | 1.635  | 2.914  | 2.213  |      |
| Rnd3          | 0.007 | 1.370 | 2.866  | 3.288  | 2.902  | 2.410  | 1.497  | 1.348  | 1.541  | 1.601  |      |
| Sox5          | 0.026 | 1.368 | 0.649  | 0.479  | 0.600  | 0.870  | -0.719 | 0.032  | -1.193 | -0.994 |      |
| Pld1          | 0.013 | 1.367 | 3.188  | 3.792  | 2.877  | 2.894  | 1.821  | 1.700  | 2.031  | 1.731  |      |
| Pik3c2g       | 0.011 | 1.366 | 0.040  | 0.469  | -0.294 | -0.055 | -1.326 | -1.667 | -1.350 | -0.961 | Up   |
| Trps1         | 0.009 | 1.361 | 1.281  | 1.589  | 1.414  | 0.841  | -0.080 | 0.267  | -0.168 | -0.337 | Up   |
| Rps12-ps3     | 0.045 | 1.359 | 3.647  | 3.729  | 4.102  | 3.110  | 2.287  | 1.646  | 2.942  | 2.275  |      |
| Baz1a         | 0.002 | 1.359 | 2.417  | 2.692  | 2.429  | 2.131  | 1.059  | 1.288  | 0.945  | 0.944  | Up   |
| Srgap2        | 0.020 | 1.355 | 1.261  | 1.515  | 1.598  | 0.671  | -0.093 | -0.514 | 0.138  | 0.096  |      |
| Dancr         | 0.017 | 1.354 | 1.827  | 1.814  | 2.341  | 1.325  | 0.472  | 0.361  | 0.833  | 0.223  |      |
| Ptger4        | 0.044 | 1.351 | -1.178 | -0.677 | -1.583 | -1.276 | -2.529 | -3.249 | -2.399 | -1.940 | Up   |
| Cars          | 0.035 | 1.348 | 0.379  | 0.330  | -0.096 | 0.902  | -0.969 | -1.523 | -0.966 | -0.417 |      |
| Btg1          | 0.005 | 1.346 | 3.367  | 3.614  | 3.448  | 3.037  | 2.021  | 1.678  | 2.160  | 2.224  |      |
| Prelid2       | 0.027 | 1.343 | -1.328 | -0.937 | -1.741 | -1.306 | -2.671 | -2.287 | -3.305 | -2.422 |      |
| Cd84          | 0.026 | 1.343 | 0.510  | 0.824  | 0.963  | -0.256 | -0.832 | -0.749 | -0.913 | -0.835 |      |
| Asxl3         | 0.026 | 1.339 | -1.015 | -0.928 | -1.229 | -0.887 | -2.354 | -1.624 | -2.840 | -2.597 |      |
| Rps23         | 0.010 | 1.339 | 6.642  | 6.738  | 7.046  | 6.140  | 5.303  | 5.132  | 5.517  | 5.259  |      |
| BC039771      | 0.044 | 1.334 | -1.006 | -0.876 | -1.375 | -0.768 | -2.340 | -1.510 | -2.666 | -2.845 |      |
| Rfc3          | 0.022 | 1.330 | 2.840  | 2.703  | 3.410  | 2.407  | 1.510  | 1.310  | 1.933  | 1.286  |      |
| Timp3         | 0.028 | 1.324 | 0.917  | 1.184  | 0.371  | 1.198  | -0.407 | -0.648 | 0.154  | -0.727 |      |
| Sox9          | 0.047 | 1.324 | 2.450  | 2.839  | 2.841  | 1.668  | 1.125  | 0.758  | 1.609  | 1.009  |      |
| Tomt          | 0.025 | 1.320 | -1.076 | -0.839 | -0.585 | -1.804 | -2.396 | -2.539 | -2.281 | -2.369 |      |
| Dusp16        | 0.003 | 1.320 | 1.762  | 1.926  | 1.725  | 1.636  | 0.442  | 0.285  | 0.235  | 0.806  | Up   |
| Grasp         | 0.020 | 1.316 | -0.350 | -0.178 | -0.629 | -0.244 | -1.667 | -2.299 | -1.267 | -1.434 |      |
| Olfm1         | 0.029 | 1.313 | 1.709  | 2.169  | 1.205  | 1.752  | 0.395  | 0.078  | 0.948  | 0.159  | Down |
| 2610203C20Rik | 0.012 | 1.313 | 1.065  | 0.870  | 1.447  | 0.877  | -0.248 | -0.608 | 0.183  | -0.320 |      |
| Sh3bp2        | 0.035 | 1.312 | -1.000 | -0.699 | -0.715 | -1.587 | -2.312 | -2.668 | -2.552 | -1.716 | Up   |
| Fam32a        | 0.018 | 1.310 | 3.453  | 3.519  | 2.994  | 3.848  | 2.143  | 1.760  | 2.125  | 2.544  |      |
| Arg1          | 0.049 | 1.310 | 1.000  | 1.557  | 0.361  | 1.081  | -0.310 | -0.688 | 0.318  | -0.560 |      |
| Rad50         | 0.030 | 1.306 | 3.233  | 3.150  | 3.832  | 2.715  | 1.926  | 1.561  | 1.888  | 2.330  |      |
| Rpl7          | 0.003 | 1.306 | 6.345  | 6.444  | 6.563  | 6.029  | 5.039  | 4.889  | 5.269  | 4.960  |      |
| Olf801        | 0.026 | 1.304 | 1.290  | 1.102  | 1.620  | 1.148  | -0.014 | 0.662  | -0.325 | -0.380 |      |
| Mettl21c      | 0.008 | 1.293 | 0.028  | 0.078  | 0.437  | -0.433 | -1.265 | -1.227 | -1.135 | -1.434 |      |
| Zfp930        | 0.025 | 1.291 | 0.575  | 0.767  | 0.757  | 0.200  | -0.717 | -0.086 | -1.104 | -0.959 |      |
| Pcsk5         | 0.009 | 1.279 | -1.430 | -1.687 | -0.914 | -1.688 | -2.709 | -2.635 | -2.848 | -2.644 |      |
| Vrk2          | 0.034 | 1.273 | 1.295  | 1.350  | 1.605  | 0.930  | 0.022  | -0.651 | 0.532  | 0.185  |      |
| Mycl          | 0.028 | 1.272 | 0.771  | 1.291  | 0.393  | 0.630  | -0.500 | -0.838 | -0.691 | 0.027  | Up   |
| 4933423P22Rik | 0.044 | 1.260 | 0.339  | 0.404  | 0.278  | 0.335  | -0.921 | -0.836 | -1.706 | -0.221 |      |
| 5430403G16Rik | 0.008 | 1.259 | -0.430 | -0.081 | -0.542 | -0.668 | -1.689 | -1.656 | -2.015 | -1.396 |      |
| Rps20         | 0.016 | 1.256 | 6.243  | 6.295  | 6.638  | 5.796  | 4.987  | 5.015  | 4.635  | 5.311  |      |
| Trmt10a       | 0.048 | 1.252 | 2.713  | 3.061  | 2.516  | 2.562  | 1.461  | 0.934  | 2.268  | 1.181  |      |
| Gm4835        | 0.037 | 1.250 | -0.455 | -0.512 | -0.043 | -0.811 | -1.705 | -1.052 | -1.877 | -2.187 |      |
| Epb4.1l2      | 0.038 | 1.245 | 1.323  | 1.600  | 1.698  | 0.672  | 0.078  | -0.376 | 0.473  | 0.136  |      |
| Gfra1         | 0.030 | 1.242 | -0.437 | -0.156 | -0.037 | -1.117 | -1.679 | -1.687 | -1.409 | -1.942 | Up   |
| Srf           | 0.022 | 1.238 | 1.568  | 1.821  | 1.032  | 1.850  | 0.330  | -0.025 | 0.321  | 0.694  | Up   |
| 9830144P21Rik | 0.014 | 1.234 | -0.267 | 0.023  | -0.206 | -0.619 | -1.501 | -1.914 | -1.125 | -1.464 |      |
| Kdelc1        | 0.020 | 1.232 | 1.818  | 1.925  | 1.798  | 1.731  | 0.586  | 0.793  | -0.053 | 1.018  |      |
| Ing3          | 0.010 | 1.224 | 3.884  | 3.938  | 3.776  | 3.939  | 2.660  | 2.432  | 2.368  | 3.180  |      |
| Bloc1s1       | 0.028 | 1.221 | 2.098  | 2.810  | 1.803  | 1.681  | 0.877  | 0.851  | 0.821  | 0.960  |      |
| Taf1d         | 0.017 | 1.218 | 3.391  | 3.317  | 3.944  | 2.910  | 2.172  | 2.074  | 2.293  | 2.149  |      |
| Lgmn          | 0.018 | 1.217 | 1.671  | 2.149  | 1.726  | 1.138  | 0.454  | 0.322  | 0.670  | 0.371  | Down |
| Lurap1l       | 0.010 | 1.216 | 1.797  | 1.956  | 2.136  | 1.298  | 0.580  | 0.495  | 0.523  | 0.723  | Up   |
| Wwp1          | 0.013 | 1.214 | 2.699  | 2.973  | 2.991  | 2.132  | 1.485  | 1.485  | 1.523  | 1.446  |      |
| Cast          | 0.038 | 1.212 | 0.659  | 0.568  | 1.191  | 0.218  | -0.553 | -0.927 | -0.722 | -0.010 |      |

|               |       |       |        |        |        |        |        |        |        |        |      |
|---------------|-------|-------|--------|--------|--------|--------|--------|--------|--------|--------|------|
| Cnbd2         | 0.021 | 1.211 | 0.832  | 1.152  | 0.740  | 0.603  | -0.380 | 0.050  | -0.280 | -0.910 |      |
| Gm20917       | 0.024 | 1.210 | -1.470 | -1.858 | -0.875 | -1.676 | -2.680 | -2.374 | -2.736 | -2.931 |      |
| Lima1         | 0.028 | 1.207 | 2.195  | 2.413  | 2.495  | 1.677  | 0.987  | 0.535  | 1.045  | 1.382  |      |
| Gm6563        | 0.021 | 1.204 | 1.786  | 1.905  | 1.786  | 1.667  | 0.582  | 0.159  | 0.378  | 1.209  |      |
| Eci2          | 0.000 | 1.202 | 2.640  | 2.812  | 2.521  | 2.588  | 1.439  | 1.341  | 1.430  | 1.545  | Up   |
| Lrrn1         | 0.009 | 1.201 | 2.257  | 2.645  | 2.227  | 1.898  | 1.055  | 0.798  | 1.169  | 1.199  |      |
| Cald1         | 0.023 | 1.201 | 2.366  | 1.723  | 2.678  | 2.696  | 1.165  | 1.293  | 1.210  | 0.992  | Up   |
| Pgrmc1        | 0.004 | 1.200 | 3.145  | 3.373  | 2.933  | 3.128  | 1.945  | 2.002  | 1.650  | 2.184  |      |
| Nufip1        | 0.017 | 1.200 | 0.660  | 1.116  | 0.590  | 0.275  | -0.539 | -0.813 | -0.200 | -0.605 |      |
| Gm4617        | 0.038 | 1.194 | -0.918 | -0.507 | -0.841 | -1.406 | -2.112 | -2.395 | -2.413 | -1.530 |      |
| Gm10029       | 0.049 | 1.191 | 2.479  | 2.417  | 3.050  | 1.971  | 1.288  | 0.715  | 1.501  | 1.648  |      |
| Bag3          | 0.039 | 1.189 | -0.027 | 0.219  | -0.197 | -0.102 | -1.216 | -1.261 | -0.549 | -1.836 | Up   |
| Gm26552       | 0.007 | 1.187 | -0.004 | -0.230 | -0.064 | 0.282  | -1.191 | -1.101 | -1.529 | -0.942 |      |
| Gm26893       | 0.007 | 1.187 | -0.004 | -0.230 | -0.064 | 0.282  | -1.191 | -1.101 | -1.529 | -0.942 |      |
| Kdsr          | 0.011 | 1.186 | 0.015  | 0.088  | 0.235  | -0.278 | -1.171 | -1.475 | -0.744 | -1.296 |      |
| Zbed3         | 0.017 | 1.181 | 1.941  | 2.149  | 2.195  | 1.478  | 0.759  | 0.418  | 1.072  | 0.788  |      |
| Mcm2          | 0.046 | 1.178 | -0.449 | -0.160 | 0.036  | -1.222 | -1.626 | -1.458 | -1.891 | -1.529 |      |
| Peli1         | 0.020 | 1.177 | 2.564  | 2.968  | 2.256  | 2.469  | 1.387  | 0.923  | 1.561  | 1.679  |      |
| Tbc1d9        | 0.034 | 1.176 | 0.518  | 0.731  | -0.155 | 0.978  | -0.658 | -0.834 | -0.763 | -0.376 |      |
| Gm9003        | 0.045 | 1.175 | -0.126 | 0.531  | -0.804 | -0.105 | -1.301 | -1.357 | -1.053 | -1.492 |      |
| Pdlim5        | 0.005 | 1.167 | 2.519  | 2.799  | 2.268  | 2.490  | 1.352  | 1.343  | 1.119  | 1.594  |      |
| Aplp2         | 0.019 | 1.165 | 3.885  | 4.171  | 3.790  | 3.692  | 2.720  | 2.202  | 3.098  | 2.859  |      |
| Rps26         | 0.049 | 1.164 | 5.914  | 6.026  | 6.424  | 5.293  | 4.750  | 4.271  | 4.838  | 5.140  |      |
| Zfand5        | 0.017 | 1.161 | 5.058  | 5.441  | 4.821  | 4.912  | 3.897  | 3.456  | 4.161  | 4.074  |      |
| 9030622O22Rik | 0.033 | 1.159 | 2.402  | 2.099  | 2.100  | 3.008  | 1.243  | 1.456  | 1.425  | 0.847  |      |
| Rps4x         | 0.027 | 1.156 | 7.288  | 7.334  | 7.706  | 6.824  | 6.132  | 5.691  | 6.319  | 6.386  |      |
| Sap30bp       | 0.002 | 1.150 | 2.968  | 2.969  | 3.165  | 2.771  | 1.819  | 1.827  | 2.021  | 1.609  |      |
| Jmjd1c        | 0.002 | 1.147 | 4.710  | 4.898  | 4.665  | 4.567  | 3.563  | 3.398  | 3.469  | 3.821  |      |
| Slc43a1       | 0.049 | 1.146 | -1.024 | -1.267 | -0.525 | -1.280 | -2.170 | -2.057 | -2.781 | -1.672 |      |
| Ints7         | 0.017 | 1.145 | 0.207  | 0.678  | 0.173  | -0.230 | -0.938 | -1.169 | -0.899 | -0.747 | Up   |
| Lamb1         | 0.023 | 1.145 | 3.501  | 3.619  | 3.774  | 3.111  | 2.357  | 1.863  | 2.623  | 2.583  | Up   |
| Nacc2         | 0.004 | 1.143 | -0.314 | -0.033 | -0.347 | -0.561 | -1.457 | -1.643 | -1.459 | -1.268 | Up   |
| Snhg4         | 0.005 | 1.138 | 1.803  | 1.988  | 2.001  | 1.421  | 0.665  | 0.789  | 0.700  | 0.507  | Up   |
| Rnf128        | 0.001 | 1.137 | 2.080  | 2.009  | 2.013  | 2.216  | 0.942  | 0.854  | 0.792  | 1.181  |      |
| 2010107G23Rik | 0.030 | 1.134 | 2.522  | 2.988  | 1.960  | 2.617  | 1.388  | 1.126  | 1.695  | 1.341  |      |
| Mms22l        | 0.026 | 1.131 | 1.115  | 1.067  | 1.651  | 0.626  | -0.016 | 0.234  | -0.231 | -0.051 |      |
| Rcc2          | 0.018 | 1.129 | 0.542  | 0.559  | 0.771  | 0.294  | -0.588 | -1.001 | -0.647 | -0.115 |      |
| Gem           | 0.048 | 1.128 | 1.022  | 1.660  | 0.418  | 0.988  | -0.106 | -0.047 | -0.437 | 0.166  |      |
| Odc1          | 0.024 | 1.118 | 4.672  | 4.828  | 5.045  | 4.144  | 3.554  | 3.238  | 3.699  | 3.724  |      |
| 4930422G04Rik | 0.015 | 1.115 | -0.471 | -0.494 | -0.209 | -0.709 | -1.586 | -1.199 | -2.006 | -1.552 |      |
| Gm5903        | 0.001 | 1.109 | 1.228  | 1.456  | 1.036  | 1.192  | 0.119  | 0.013  | 0.094  | 0.251  |      |
| Sel1l3        | 0.008 | 1.105 | -0.450 | -0.041 | -0.552 | -0.758 | -1.555 | -1.663 | -1.548 | -1.454 |      |
| Marcksl1      | 0.030 | 1.101 | 3.292  | 3.658  | 3.151  | 3.068  | 2.191  | 1.724  | 2.685  | 2.163  |      |
| Gata6         | 0.009 | 1.100 | 0.944  | 1.321  | 0.860  | 0.650  | -0.157 | -0.375 | -0.125 | 0.030  | Down |
| Lbp           | 0.047 | 1.100 | 2.497  | 3.087  | 2.322  | 2.081  | 1.397  | 0.925  | 1.719  | 1.545  |      |
| Cnpy4         | 0.024 | 1.099 | 2.620  | 2.913  | 2.507  | 2.441  | 1.521  | 1.435  | 1.096  | 2.032  |      |
| Apex1         | 0.023 | 1.098 | 1.120  | 1.390  | 1.144  | 0.825  | 0.021  | -0.496 | 0.294  | 0.265  |      |
| Ifitm2        | 0.040 | 1.098 | 3.552  | 4.001  | 3.788  | 2.869  | 2.455  | 2.322  | 2.366  | 2.677  | Up   |
| Gria2         | 0.050 | 1.097 | 1.150  | 1.567  | 0.399  | 1.483  | 0.053  | -0.105 | 0.289  | -0.025 |      |
| Fchsd2        | 0.010 | 1.097 | 3.690  | 3.982  | 3.784  | 3.304  | 2.594  | 2.358  | 2.660  | 2.763  | Up   |
| Gm11353       | 0.029 | 1.091 | 4.100  | 4.209  | 4.476  | 3.616  | 3.009  | 2.708  | 3.398  | 2.920  |      |
| Olfr1459      | 0.033 | 1.088 | -0.394 | -0.518 | -0.041 | -0.623 | -1.482 | -1.764 | -1.782 | -0.899 |      |
| Vps26a        | 0.023 | 1.087 | 2.608  | 2.656  | 2.668  | 2.502  | 1.521  | 1.664  | 0.949  | 1.950  |      |
| Ruvbl1        | 0.043 | 1.084 | 2.052  | 2.042  | 2.463  | 1.650  | 0.967  | 1.378  | 0.414  | 1.109  |      |
| Gm15501       | 0.031 | 1.082 | 4.083  | 4.195  | 4.456  | 3.598  | 3.001  | 2.715  | 3.418  | 2.870  |      |
| Gm11878       | 0.037 | 1.082 | 3.550  | 3.575  | 4.073  | 3.001  | 2.468  | 2.229  | 2.789  | 2.387  |      |

|               |       |       |        |        |        |        |        |        |        |        |      |
|---------------|-------|-------|--------|--------|--------|--------|--------|--------|--------|--------|------|
| Naa40         | 0.016 | 1.072 | -0.151 | 0.080  | 0.102  | -0.637 | -1.224 | -1.414 | -1.248 | -1.009 |      |
| Gm15064       | 0.007 | 1.071 | 1.504  | 1.615  | 1.406  | 1.491  | 0.433  | 0.027  | 0.675  | 0.596  |      |
| Kif13a        | 0.004 | 1.068 | 0.434  | 0.729  | 0.317  | 0.257  | -0.634 | -0.654 | -0.792 | -0.456 |      |
| Gm7658        | 0.039 | 1.062 | 1.127  | 1.462  | 1.127  | 0.793  | 0.065  | -0.367 | 0.627  | -0.064 |      |
| Gm11914       | 0.009 | 1.061 | 2.483  | 2.330  | 2.729  | 2.389  | 1.421  | 1.214  | 1.251  | 1.799  |      |
| Alcam         | 0.023 | 1.061 | 4.960  | 4.926  | 4.629  | 5.326  | 3.900  | 3.500  | 4.245  | 3.953  | Up   |
| Fos           | 0.036 | 1.060 | 3.855  | 4.177  | 3.840  | 3.549  | 2.795  | 2.316  | 3.311  | 2.759  | Up   |
| Marcks        | 0.018 | 1.057 | 5.576  | 5.958  | 5.156  | 5.614  | 4.519  | 4.229  | 4.626  | 4.701  | Up   |
| Pim3          | 0.025 | 1.056 | -0.385 | -0.296 | -0.198 | -0.661 | -1.442 | -1.078 | -1.959 | -1.287 |      |
| Rpl32         | 0.049 | 1.056 | 6.188  | 6.246  | 6.649  | 5.670  | 5.132  | 4.635  | 5.407  | 5.353  |      |
| Meis1         | 0.002 | 1.056 | 2.232  | 2.366  | 2.390  | 1.942  | 1.177  | 1.103  | 1.251  | 1.176  |      |
| Igfbp5        | 0.024 | 1.056 | 1.583  | 1.642  | 1.869  | 1.237  | 0.527  | 0.682  | 0.071  | 0.829  | Up   |
| Gm12174       | 0.017 | 1.055 | 1.695  | 1.809  | 1.948  | 1.328  | 0.640  | 0.435  | 1.017  | 0.468  |      |
| Gm2000        | 0.033 | 1.048 | 3.323  | 3.449  | 3.783  | 2.737  | 2.275  | 2.328  | 2.439  | 2.056  |      |
| BC042782      | 0.019 | 1.048 | -0.096 | 0.235  | -0.461 | -0.062 | -1.144 | -1.248 | -1.402 | -0.780 |      |
| Mtmr14        | 0.001 | 1.042 | 1.971  | 2.064  | 1.707  | 2.143  | 0.929  | 0.936  | 0.925  | 0.925  |      |
| Cd55          | 0.034 | 1.040 | 1.669  | 1.765  | 1.490  | 1.751  | 0.629  | 0.108  | 1.196  | 0.583  |      |
| Msantd3       | 0.017 | 1.036 | 2.207  | 1.968  | 2.532  | 2.122  | 1.171  | 1.557  | 1.076  | 0.879  |      |
| Prox1         | 0.022 | 1.033 | 4.698  | 5.066  | 4.252  | 4.775  | 3.665  | 3.450  | 3.577  | 3.968  | Up   |
| Rpl13-ps3     | 0.017 | 1.032 | 1.215  | 1.270  | 1.540  | 0.834  | 0.182  | 0.001  | 0.506  | 0.039  |      |
| Gm12715       | 0.014 | 1.032 | 4.759  | 5.102  | 4.485  | 4.691  | 3.727  | 3.475  | 4.040  | 3.666  |      |
| Pde8b         | 0.036 | 1.030 | -0.033 | -0.273 | 0.496  | -0.323 | -1.063 | -1.255 | -1.268 | -0.666 | Down |
| Gm10330       | 0.044 | 1.029 | 1.232  | 1.250  | 1.031  | 1.415  | 0.204  | -0.361 | 0.801  | 0.172  |      |
| Pgm2l1        | 0.015 | 1.028 | 1.205  | 1.414  | 0.790  | 1.411  | 0.177  | -0.099 | 0.271  | 0.358  | Up   |
| Gm11361       | 0.046 | 1.028 | 4.322  | 4.432  | 4.655  | 3.878  | 3.294  | 3.190  | 3.813  | 2.879  |      |
| Gm8430        | 0.039 | 1.026 | 5.161  | 5.332  | 5.537  | 4.615  | 4.135  | 4.008  | 4.512  | 3.885  |      |
| Mrps26        | 0.034 | 1.023 | 0.354  | 0.242  | 0.748  | 0.071  | -0.669 | -1.128 | -0.623 | -0.256 |      |
| Frk           | 0.006 | 1.022 | 1.016  | 1.153  | 1.233  | 0.662  | -0.006 | -0.121 | -0.041 | 0.145  |      |
| Cldn6         | 0.016 | 1.021 | 4.847  | 5.079  | 4.816  | 4.647  | 3.827  | 3.426  | 3.863  | 4.190  | Up   |
| Gpr125        | 0.026 | 1.012 | 0.443  | 0.458  | 0.869  | 0.001  | -0.570 | -0.827 | -0.303 | -0.579 |      |
| Gm9843        | 0.022 | 1.010 | 6.590  | 6.868  | 6.589  | 6.313  | 5.580  | 5.399  | 6.032  | 5.307  |      |
| Sh3bp5        | 0.022 | 1.009 | 1.184  | 1.607  | 1.143  | 0.802  | 0.175  | -0.026 | 0.463  | 0.088  | Up   |
| G530011O06Rik | 0.002 | 1.007 | 1.369  | 1.426  | 1.134  | 1.548  | 0.363  | 0.250  | 0.310  | 0.527  |      |
| Rbmxl1        | 0.004 | 1.005 | 3.554  | 3.631  | 3.735  | 3.296  | 2.549  | 2.361  | 2.584  | 2.701  |      |
| Prmt10        | 0.042 | 0.996 | 1.309  | 1.391  | 0.835  | 1.703  | 0.314  | -0.108 | 0.409  | 0.640  |      |
| Nrbp2         | 0.014 | 0.995 | 0.576  | 0.790  | 0.149  | 0.788  | -0.419 | -0.542 | -0.219 | -0.497 |      |
| Rfwd3         | 0.006 | 0.991 | 3.459  | 3.698  | 3.275  | 3.405  | 2.468  | 2.271  | 2.394  | 2.739  |      |
| Rttn          | 0.009 | 0.990 | -0.840 | -1.165 | -0.586 | -0.769 | -1.830 | -1.619 | -2.052 | -1.821 |      |
| Cideb         | 0.014 | 0.987 | -0.922 | -0.588 | -0.853 | -1.325 | -1.909 | -2.102 | -1.802 | -1.822 |      |
| Lamc1         | 0.043 | 0.985 | 4.184  | 4.285  | 4.464  | 3.802  | 3.199  | 2.699  | 3.637  | 3.261  |      |
| Haus6         | 0.036 | 0.985 | 1.322  | 1.222  | 1.886  | 0.859  | 0.337  | 0.451  | 0.432  | 0.130  |      |
| Rps18-ps3     | 0.049 | 0.984 | 4.121  | 4.192  | 4.490  | 3.682  | 3.137  | 2.884  | 3.663  | 2.865  |      |
| Btbd17        | 0.019 | 0.983 | -0.272 | 0.012  | -0.556 | -0.273 | -1.255 | -1.340 | -1.548 | -0.879 |      |
| Gm15500       | 0.027 | 0.980 | 5.938  | 5.868  | 6.294  | 5.652  | 4.958  | 4.843  | 5.377  | 4.654  |      |
| Smo           | 0.037 | 0.973 | 0.529  | 0.610  | 1.010  | -0.033 | -0.444 | -0.509 | -0.266 | -0.556 | Up   |
| Gm5908        | 0.036 | 0.971 | 1.067  | 1.309  | 1.319  | 0.574  | 0.096  | 0.389  | -0.266 | 0.165  |      |
| Cobl          | 0.016 | 0.970 | -0.208 | 0.241  | -0.337 | -0.527 | -1.178 | -1.033 | -1.257 | -1.243 |      |
| Gm7324        | 0.025 | 0.969 | 0.671  | 0.616  | 0.721  | 0.675  | -0.298 | -0.797 | -0.253 | 0.156  |      |
| 5730507C01Rik | 0.002 | 0.964 | 0.985  | 0.907  | 0.958  | 1.091  | 0.021  | 0.252  | -0.016 | -0.173 |      |
| 5430416N02Rik | 0.029 | 0.963 | 4.093  | 4.203  | 4.160  | 3.914  | 3.129  | 2.803  | 3.678  | 2.906  | Up   |
| Timp2         | 0.024 | 0.963 | 0.657  | 0.464  | 1.093  | 0.415  | -0.306 | 0.018  | -0.454 | -0.481 |      |
| Gm11263       | 0.026 | 0.962 | 3.718  | 3.805  | 3.990  | 3.359  | 2.756  | 2.533  | 3.168  | 2.566  |      |
| Bola3         | 0.038 | 0.961 | 2.381  | 2.057  | 2.255  | 2.831  | 1.420  | 1.289  | 1.833  | 1.139  |      |
| Gm14970       | 0.037 | 0.960 | 2.130  | 2.322  | 2.330  | 1.738  | 1.170  | 0.887  | 0.973  | 1.651  |      |
| Gm16409       | 0.014 | 0.958 | 3.291  | 3.323  | 3.548  | 3.001  | 2.332  | 2.190  | 2.662  | 2.146  |      |
| Rras2         | 0.038 | 0.958 | 0.732  | 0.299  | 1.223  | 0.674  | -0.226 | 0.021  | -0.169 | -0.529 | Up   |

|               |       |       |        |        |        |        |        |        |        |        |      |
|---------------|-------|-------|--------|--------|--------|--------|--------|--------|--------|--------|------|
| Gm12918       | 0.017 | 0.956 | 1.438  | 1.461  | 1.793  | 1.060  | 0.482  | 0.304  | 0.706  | 0.436  |      |
| Rpl15-ps2     | 0.001 | 0.953 | 3.390  | 3.496  | 3.452  | 3.222  | 2.437  | 2.387  | 2.557  | 2.367  |      |
| Rpl17         | 0.037 | 0.953 | 5.964  | 5.974  | 6.406  | 5.510  | 5.011  | 4.684  | 5.094  | 5.254  |      |
| Gm10335       | 0.038 | 0.950 | 1.793  | 2.006  | 2.101  | 1.273  | 0.843  | 0.578  | 1.157  | 0.795  |      |
| Tmem123       | 0.030 | 0.947 | 2.287  | 2.621  | 2.304  | 1.937  | 1.340  | 0.933  | 1.629  | 1.459  |      |
| AA474408      | 0.031 | 0.947 | -0.258 | 0.235  | -0.665 | -0.345 | -1.205 | -1.444 | -1.039 | -1.132 |      |
| Gm15724       | 0.007 | 0.943 | 1.068  | 1.334  | 0.752  | 1.119  | 0.125  | -0.005 | 0.272  | 0.109  |      |
| Gm7536        | 0.022 | 0.943 | 3.186  | 3.293  | 3.569  | 2.698  | 2.244  | 2.205  | 2.290  | 2.236  |      |
| Rps6-ps4      | 0.027 | 0.940 | 6.246  | 6.321  | 6.485  | 5.933  | 5.306  | 5.165  | 5.738  | 5.016  |      |
| Rcbtb2        | 0.024 | 0.939 | 1.941  | 2.238  | 1.649  | 1.937  | 1.002  | 0.608  | 1.292  | 1.107  |      |
| Gm5805        | 0.027 | 0.939 | 2.648  | 2.580  | 2.715  | 2.649  | 1.709  | 1.375  | 2.248  | 1.505  |      |
| Rps27         | 0.034 | 0.938 | 5.830  | 6.080  | 5.987  | 5.422  | 4.891  | 4.472  | 5.028  | 5.173  |      |
| Tjp2          | 0.013 | 0.937 | 0.004  | -0.058 | 0.222  | -0.153 | -0.934 | -1.302 | -0.808 | -0.692 | Up   |
| Ntan1         | 0.042 | 0.936 | 2.358  | 2.447  | 2.700  | 1.927  | 1.422  | 1.114  | 1.304  | 1.848  |      |
| Usp25         | 0.033 | 0.936 | 1.380  | 1.306  | 1.818  | 1.015  | 0.444  | 0.097  | 0.601  | 0.634  | Up   |
| Gm2366        | 0.044 | 0.935 | 0.303  | 0.754  | -0.289 | 0.444  | -0.632 | -0.747 | -0.700 | -0.451 |      |
| 2610204G07Rik | 0.047 | 0.931 | 1.034  | 0.865  | 1.231  | 1.007  | 0.103  | 0.627  | 0.130  | -0.447 |      |
| Arhgef38      | 0.029 | 0.930 | 0.266  | 0.340  | 0.268  | 0.189  | -0.664 | -0.316 | -1.208 | -0.468 |      |
| Syne1         | 0.017 | 0.930 | 1.557  | 1.675  | 1.124  | 1.873  | 0.628  | 0.640  | 0.503  | 0.741  |      |
| Rplp1         | 0.020 | 0.929 | 2.595  | 2.516  | 3.050  | 2.218  | 1.666  | 1.704  | 1.726  | 1.568  |      |
| Fau           | 0.030 | 0.924 | 7.074  | 7.382  | 7.123  | 6.719  | 6.150  | 5.813  | 6.517  | 6.121  |      |
| Gm7729        | 0.034 | 0.923 | 2.542  | 2.749  | 2.756  | 2.121  | 1.619  | 1.247  | 1.949  | 1.659  |      |
| Magi1         | 0.049 | 0.918 | 0.251  | 0.622  | 0.501  | -0.371 | -0.667 | -0.856 | -0.624 | -0.523 |      |
| Gm7803        | 0.031 | 0.916 | 2.324  | 2.239  | 2.689  | 2.045  | 1.409  | 1.182  | 1.818  | 1.226  |      |
| Ccdc125       | 0.044 | 0.913 | 0.604  | 0.777  | 0.422  | 0.615  | -0.308 | -0.769 | -0.402 | 0.247  | Up   |
| Rps6-ps3      | 0.026 | 0.912 | 4.018  | 4.060  | 4.302  | 3.693  | 3.107  | 2.869  | 3.500  | 2.951  |      |
| Wrn           | 0.019 | 0.911 | 0.932  | 1.192  | 1.062  | 0.543  | 0.021  | -0.184 | -0.029 | 0.275  |      |
| Hnrnpa1       | 0.009 | 0.910 | 6.696  | 6.814  | 6.602  | 6.674  | 5.787  | 5.423  | 5.931  | 6.007  |      |
| Zfp101        | 0.000 | 0.908 | 1.592  | 1.632  | 1.495  | 1.649  | 0.685  | 0.642  | 0.799  | 0.613  |      |
| Gm6807        | 0.022 | 0.904 | 1.965  | 1.931  | 2.306  | 1.656  | 1.061  | 0.818  | 1.373  | 0.991  |      |
| Celf2         | 0.003 | 0.903 | 2.985  | 3.257  | 2.803  | 2.896  | 2.082  | 2.051  | 2.105  | 2.090  |      |
| Zdhhc9        | 0.007 | 0.901 | 0.472  | 0.736  | 0.497  | 0.182  | -0.429 | -0.443 | -0.547 | -0.299 |      |
| Pfkip         | 0.009 | 0.900 | 0.492  | 0.663  | 0.362  | 0.450  | -0.408 | -0.249 | -0.231 | -0.743 |      |
| Ppie          | 0.030 | 0.897 | 0.466  | 0.522  | 0.712  | 0.166  | -0.430 | -0.752 | -0.006 | -0.534 |      |
| Actg1         | 0.009 | 0.893 | 5.878  | 6.144  | 5.683  | 5.806  | 4.985  | 4.747  | 5.183  | 5.023  | Up   |
| Snrpe         | 0.031 | 0.891 | 6.289  | 6.222  | 6.532  | 6.114  | 5.398  | 4.916  | 5.664  | 5.614  |      |
| Gm13443       | 0.014 | 0.891 | 2.570  | 2.808  | 2.573  | 2.328  | 1.679  | 1.362  | 1.895  | 1.780  |      |
| Malt1         | 0.038 | 0.882 | 0.869  | 1.293  | 0.735  | 0.578  | -0.014 | -0.351 | -0.004 | 0.313  |      |
| Spin2e        | 0.047 | 0.880 | 0.162  | -0.332 | 0.682  | 0.136  | -0.718 | -0.683 | -0.557 | -0.913 |      |
| Rpl5-ps1      | 0.029 | 0.880 | 3.217  | 3.158  | 3.591  | 2.902  | 2.337  | 2.244  | 2.672  | 2.095  |      |
| Plekhf2       | 0.046 | 0.874 | 1.669  | 1.923  | 1.864  | 1.221  | 0.795  | 0.383  | 1.044  | 0.959  | Up   |
| Acot2         | 0.001 | 0.874 | 0.912  | 1.082  | 0.917  | 0.737  | 0.038  | 0.076  | -0.055 | 0.094  | Up   |
| Gm8172        | 0.028 | 0.872 | 3.411  | 3.432  | 3.678  | 3.122  | 2.538  | 2.186  | 2.881  | 2.549  |      |
| Qk            | 0.048 | 0.872 | 3.532  | 3.781  | 3.781  | 3.034  | 2.660  | 2.293  | 2.860  | 2.827  |      |
| Rpl5          | 0.031 | 0.870 | 8.628  | 8.551  | 9.006  | 8.327  | 7.758  | 7.402  | 7.950  | 7.922  |      |
| Sirt1         | 0.029 | 0.869 | 2.462  | 2.603  | 2.405  | 2.379  | 1.593  | 1.461  | 2.080  | 1.240  | Up   |
| Gm10186       | 0.034 | 0.867 | 3.292  | 3.551  | 3.456  | 2.870  | 2.425  | 2.299  | 2.768  | 2.210  |      |
| Hspa8         | 0.022 | 0.866 | 8.558  | 8.728  | 8.570  | 8.374  | 7.692  | 7.345  | 8.083  | 7.647  | Down |
| Gm10052       | 0.010 | 0.864 | 2.705  | 2.899  | 2.661  | 2.554  | 1.841  | 1.756  | 2.145  | 1.622  |      |
| Fam60a        | 0.011 | 0.864 | 4.168  | 4.128  | 3.872  | 4.505  | 3.304  | 3.354  | 3.178  | 3.380  |      |
| Fam162a       | 0.034 | 0.860 | 3.742  | 3.711  | 4.162  | 3.351  | 2.881  | 2.718  | 2.767  | 3.159  |      |
| Rab13         | 0.040 | 0.854 | 1.406  | 1.664  | 1.323  | 1.232  | 0.552  | 0.051  | 0.766  | 0.840  | Up   |
| Gm7206        | 0.031 | 0.852 | 0.801  | 0.810  | 0.677  | 0.918  | -0.051 | -0.404 | 0.436  | -0.185 |      |
| Zfp125        | 0.027 | 0.850 | 1.060  | 0.840  | 0.884  | 1.456  | 0.210  | 0.503  | 0.123  | 0.005  |      |
| Mbtps2        | 0.049 | 0.838 | 3.198  | 3.504  | 3.439  | 2.650  | 2.360  | 2.293  | 2.591  | 2.196  |      |
| Zscan21       | 0.006 | 0.838 | 1.581  | 1.664  | 1.465  | 1.614  | 0.743  | 0.711  | 0.508  | 1.011  |      |

|               |       |        |        |        |        |        |        |        |        |        |    |
|---------------|-------|--------|--------|--------|--------|--------|--------|--------|--------|--------|----|
| Ogt           | 0.034 | 0.836  | 4.796  | 4.964  | 4.619  | 4.804  | 3.960  | 3.470  | 4.166  | 4.243  |    |
| Lmna          | 0.039 | 0.829  | 0.206  | 0.158  | 0.107  | 0.354  | -0.623 | -1.131 | -0.495 | -0.242 |    |
| Rpl17-ps5     | 0.044 | 0.828  | 3.394  | 3.333  | 3.842  | 3.005  | 2.565  | 2.273  | 2.675  | 2.747  |    |
| Ptp4a2        | 0.043 | 0.828  | 5.294  | 5.529  | 5.560  | 4.794  | 4.466  | 4.310  | 4.358  | 4.731  |    |
| Hmgb1         | 0.028 | 0.825  | 6.262  | 6.197  | 6.621  | 5.969  | 5.437  | 5.171  | 5.692  | 5.449  |    |
| Ugt8a         | 0.023 | 0.823  | 2.494  | 2.256  | 2.857  | 2.368  | 1.671  | 1.695  | 1.425  | 1.892  |    |
| Polq          | 0.011 | 0.822  | 1.401  | 1.653  | 1.467  | 1.085  | 0.579  | 0.726  | 0.508  | 0.504  |    |
| Acadl         | 0.032 | 0.820  | 2.107  | 2.147  | 2.088  | 2.085  | 1.287  | 0.781  | 1.514  | 1.566  | Up |
| Rpl37a        | 0.038 | 0.816  | 5.187  | 5.278  | 5.345  | 4.940  | 4.372  | 3.960  | 4.376  | 4.778  |    |
| Ctps2         | 0.015 | 0.804  | 4.528  | 4.457  | 4.387  | 4.741  | 3.724  | 3.504  | 3.624  | 4.045  |    |
| Sdcbp         | 0.020 | 0.802  | 5.589  | 5.883  | 5.601  | 5.284  | 4.787  | 4.541  | 4.934  | 4.887  |    |
| Manea         | 0.020 | 0.798  | 0.450  | 0.728  | 0.394  | 0.229  | -0.348 | -0.540 | -0.040 | -0.463 |    |
| Rnf44         | 0.043 | 0.795  | 1.204  | 1.398  | 1.191  | 1.024  | 0.409  | -0.068 | 0.524  | 0.771  | Up |
| Rnf13         | 0.046 | 0.793  | 2.195  | 2.358  | 2.265  | 1.963  | 1.403  | 0.916  | 1.552  | 1.740  |    |
| Bcl2l1        | 0.018 | 0.792  | 0.612  | 0.941  | 0.351  | 0.543  | -0.180 | 0.035  | -0.310 | -0.265 |    |
| Rps6          | 0.018 | 0.791  | 7.532  | 7.599  | 7.743  | 7.255  | 6.741  | 6.471  | 6.966  | 6.787  |    |
| Gm10020       | 0.034 | 0.787  | 3.429  | 3.552  | 3.736  | 2.999  | 2.642  | 2.544  | 2.866  | 2.516  |    |
| Glo1          | 0.049 | 0.787  | 3.743  | 4.029  | 3.721  | 3.480  | 2.957  | 2.551  | 2.963  | 3.356  | Up |
| Ints10        | 0.047 | 0.786  | 2.325  | 2.773  | 2.094  | 2.107  | 1.539  | 1.227  | 1.614  | 1.776  |    |
| Cgn           | 0.040 | 0.784  | 0.938  | 1.233  | 1.145  | 0.437  | 0.154  | 0.169  | 0.024  | 0.269  |    |
| Rbms3         | 0.020 | 0.780  | 3.714  | 4.045  | 3.500  | 3.598  | 2.934  | 2.714  | 2.957  | 3.131  |    |
| Rps3a2        | 0.024 | 0.777  | 4.533  | 4.416  | 4.797  | 4.386  | 3.756  | 3.499  | 4.086  | 3.683  |    |
| Hs6st1        | 0.033 | 0.777  | 1.790  | 2.126  | 1.761  | 1.483  | 1.013  | 1.160  | 0.701  | 1.180  | Up |
| Rpl21         | 0.035 | 0.775  | 5.700  | 5.824  | 5.653  | 5.623  | 4.925  | 4.455  | 5.081  | 5.240  |    |
| Dmd           | 0.030 | 0.767  | 3.445  | 3.363  | 3.799  | 3.175  | 2.679  | 2.708  | 2.421  | 2.907  |    |
| D130040H23Rik | 0.030 | 0.766  | 1.489  | 1.233  | 1.821  | 1.412  | 0.723  | 0.543  | 0.600  | 1.026  |    |
| Upf3a         | 0.041 | 0.765  | 1.214  | 1.007  | 1.557  | 1.077  | 0.449  | 0.077  | 0.703  | 0.567  |    |
| A330023F24Rik | 0.043 | 0.764  | -0.984 | -0.748 | -1.383 | -0.822 | -1.748 | -1.415 | -1.901 | -1.929 | Up |
| Zbtb18        | 0.042 | 0.763  | 3.030  | 3.291  | 2.745  | 3.056  | 2.268  | 1.867  | 2.533  | 2.403  | Up |
| Rpl34-ps1     | 0.027 | 0.762  | 4.251  | 4.336  | 4.391  | 4.025  | 3.488  | 3.131  | 3.788  | 3.545  |    |
| Fig4          | 0.003 | 0.762  | -0.421 | -0.587 | -0.242 | -0.435 | -1.184 | -1.224 | -1.079 | -1.248 |    |
| Zfp622        | 0.036 | 0.757  | 1.655  | 1.745  | 1.765  | 1.455  | 0.898  | 0.672  | 0.681  | 1.341  | Up |
| Ammecr1       | 0.018 | 0.753  | 1.583  | 1.804  | 1.653  | 1.292  | 0.830  | 0.704  | 0.712  | 1.072  |    |
| Gm5141        | 0.033 | 0.751  | -0.568 | -0.791 | -0.393 | -0.518 | -1.318 | -1.287 | -0.983 | -1.685 |    |
| Clcn2         | 0.004 | 0.744  | -0.343 | -0.208 | -0.472 | -0.348 | -1.086 | -1.000 | -1.277 | -0.982 |    |
| 1700066M21Rik | 0.001 | 0.741  | 0.507  | 0.529  | 0.630  | 0.361  | -0.234 | -0.282 | -0.244 | -0.177 |    |
| G2e3          | 0.043 | 0.738  | 3.402  | 3.553  | 3.588  | 3.065  | 2.664  | 2.495  | 3.038  | 2.459  |    |
| Agrn          | 0.032 | 0.738  | 1.304  | 1.654  | 1.342  | 0.917  | 0.566  | 0.539  | 0.441  | 0.719  | Up |
| Ftl1          | 0.047 | 0.737  | 4.088  | 4.392  | 4.103  | 3.767  | 3.351  | 2.979  | 3.545  | 3.528  |    |
| Galnt4        | 0.011 | 0.735  | 1.014  | 1.092  | 1.156  | 0.793  | 0.279  | 0.048  | 0.453  | 0.336  | Up |
| Gltscr2       | 0.028 | 0.734  | 1.645  | 1.959  | 1.682  | 1.293  | 0.911  | 0.744  | 0.899  | 1.089  |    |
| Ttf2          | 0.013 | 0.725  | -0.469 | -0.616 | -0.346 | -0.445 | -1.194 | -1.466 | -1.162 | -0.954 |    |
| Cbfb          | 0.038 | 0.722  | 4.089  | 4.346  | 3.820  | 4.102  | 3.367  | 3.006  | 3.576  | 3.519  |    |
| Cdc42ep4      | 0.042 | 0.722  | -0.469 | -0.098 | -0.744 | -0.566 | -1.191 | -1.494 | -1.061 | -1.019 |    |
| Gm15453       | 0.002 | 0.720  | 4.552  | 4.495  | 4.702  | 4.459  | 3.832  | 3.827  | 3.933  | 3.736  |    |
| D10Jhu81e     | 0.037 | 0.718  | 0.449  | 0.760  | 0.304  | 0.282  | -0.269 | -0.460 | 0.077  | -0.425 |    |
| Amotl1        | 0.029 | 0.716  | 1.435  | 1.358  | 1.775  | 1.171  | 0.718  | 0.502  | 0.732  | 0.921  | Up |
| Sfpq          | 0.027 | 0.712  | 6.739  | 6.983  | 6.614  | 6.621  | 6.027  | 5.686  | 6.219  | 6.175  |    |
| Gm6104        | 0.013 | 0.711  | 2.565  | 2.409  | 2.783  | 2.503  | 1.854  | 1.614  | 2.007  | 1.940  |    |
| Slbp          | 0.031 | 0.708  | 4.692  | 4.779  | 4.946  | 4.350  | 3.984  | 3.748  | 4.034  | 4.169  |    |
| Copz1         | 0.032 | -0.707 | 3.191  | 3.391  | 3.086  | 3.096  | 3.898  | 3.508  | 4.086  | 4.101  |    |
| Kras          | 0.027 | -0.714 | 4.290  | 4.364  | 3.978  | 4.528  | 5.004  | 4.783  | 4.990  | 5.240  | Up |
| Ctcf1         | 0.013 | -0.716 | -0.980 | -0.895 | -0.993 | -1.053 | -0.264 | -0.455 | 0.055  | -0.393 |    |
| 2210019I11Rik | 0.049 | -0.716 | 0.993  | 1.309  | 0.928  | 0.742  | 1.710  | 1.321  | 1.932  | 1.876  |    |
| Rnf145        | 0.049 | -0.718 | 2.828  | 2.983  | 2.410  | 3.092  | 3.546  | 3.272  | 3.607  | 3.760  |    |
| Zfp322a       | 0.020 | -0.718 | 3.351  | 3.409  | 3.267  | 3.375  | 4.069  | 3.702  | 4.324  | 4.180  |    |



|                |       |        |        |        |        |        |        |        |        |        |    |
|----------------|-------|--------|--------|--------|--------|--------|--------|--------|--------|--------|----|
| Id4            | 0.044 | -0.720 | 1.023  | 1.290  | 0.808  | 0.970  | 1.743  | 1.358  | 2.055  | 1.815  |    |
| Zfp236         | 0.034 | -0.725 | 3.159  | 3.390  | 2.714  | 3.372  | 3.883  | 3.780  | 3.972  | 3.898  | Up |
| Mdm4-ps        | 0.039 | -0.725 | 0.027  | 0.173  | -0.323 | 0.231  | 0.752  | 0.511  | 0.680  | 1.066  |    |
| Sec22a         | 0.002 | -0.728 | 0.846  | 1.008  | 0.766  | 0.764  | 1.574  | 1.503  | 1.690  | 1.528  |    |
| Tti2           | 0.027 | -0.729 | -0.139 | -0.082 | -0.185 | -0.151 | 0.590  | 0.389  | 1.012  | 0.369  |    |
| Arel1          | 0.047 | -0.731 | 1.178  | 1.439  | 0.744  | 1.350  | 1.909  | 1.943  | 1.658  | 2.127  |    |
| Canx           | 0.032 | -0.745 | 7.051  | 7.098  | 7.124  | 6.931  | 7.795  | 7.437  | 7.744  | 8.205  |    |
| Tmed7          | 0.027 | -0.745 | 3.288  | 3.480  | 3.046  | 3.337  | 4.033  | 3.687  | 4.145  | 4.268  |    |
| Ndufb4         | 0.044 | -0.748 | 3.045  | 3.099  | 3.044  | 2.993  | 3.794  | 3.360  | 4.247  | 3.775  |    |
| Pgrmc2         | 0.046 | -0.750 | 2.285  | 2.523  | 1.933  | 2.397  | 3.034  | 2.668  | 3.117  | 3.319  |    |
| Gm13736        | 0.017 | -0.750 | 3.819  | 3.926  | 4.008  | 3.523  | 4.569  | 4.337  | 4.733  | 4.637  |    |
| Ndufa1         | 0.021 | -0.754 | 5.212  | 5.289  | 5.038  | 5.310  | 5.966  | 5.623  | 6.251  | 6.024  |    |
| Slc30a5        | 0.025 | -0.754 | 2.688  | 2.873  | 2.582  | 2.609  | 3.442  | 3.071  | 3.521  | 3.733  |    |
| Aig1           | 0.037 | -0.755 | 2.482  | 2.469  | 2.090  | 2.887  | 3.237  | 3.069  | 3.351  | 3.291  |    |
| Gm26981        | 0.022 | -0.755 | 1.024  | 0.907  | 0.869  | 1.297  | 1.780  | 1.564  | 2.080  | 1.694  |    |
| Dhx32          | 0.040 | -0.757 | 0.938  | 0.831  | 1.232  | 0.750  | 1.695  | 1.368  | 2.068  | 1.648  |    |
| Gm22907        | 0.018 | -0.759 | 6.086  | 5.744  | 6.305  | 6.209  | 6.845  | 6.809  | 7.019  | 6.707  |    |
| Gm26268        | 0.018 | -0.759 | 6.086  | 5.744  | 6.305  | 6.209  | 6.845  | 6.809  | 7.019  | 6.707  |    |
| Gm22625        | 0.018 | -0.759 | 6.086  | 5.744  | 6.305  | 6.209  | 6.845  | 6.809  | 7.019  | 6.707  |    |
| Ufsp2          | 0.018 | -0.760 | 3.752  | 3.703  | 3.624  | 3.928  | 4.511  | 4.610  | 4.173  | 4.751  |    |
| Erp44          | 0.031 | -0.761 | 4.097  | 4.297  | 4.132  | 3.863  | 4.858  | 4.540  | 5.211  | 4.823  |    |
| Zfp708         | 0.013 | -0.761 | -1.369 | -1.403 | -1.108 | -1.597 | -0.608 | -0.465 | -0.820 | -0.539 |    |
| AU022252       | 0.029 | -0.761 | -0.455 | -0.372 | -0.859 | -0.136 | 0.306  | 0.151  | 0.320  | 0.447  |    |
| Ndufb8         | 0.032 | -0.762 | 4.501  | 4.527  | 4.234  | 4.742  | 5.263  | 4.900  | 5.509  | 5.379  |    |
| Ckap4          | 0.039 | -0.762 | 0.912  | 1.034  | 0.800  | 0.901  | 1.674  | 1.190  | 1.900  | 1.933  | Up |
| Arhgef10       | 0.047 | -0.763 | -0.528 | -0.861 | -0.639 | -0.085 | 0.235  | -0.024 | 0.451  | 0.277  | Up |
| Pea15a         | 0.017 | -0.767 | 2.319  | 2.694  | 2.087  | 2.175  | 3.086  | 3.008  | 3.138  | 3.112  |    |
| Ufl1           | 0.013 | -0.768 | 3.528  | 3.563  | 3.489  | 3.532  | 4.296  | 3.951  | 4.539  | 4.397  |    |
| Nrk            | 0.033 | -0.769 | -1.210 | -1.064 | -0.894 | -1.671 | -0.440 | -0.539 | -0.373 | -0.409 |    |
| Akr1c13        | 0.028 | -0.770 | 3.243  | 3.345  | 2.834  | 3.551  | 4.013  | 3.846  | 4.112  | 4.082  |    |
| Nckap1         | 0.041 | -0.771 | 4.774  | 4.830  | 4.504  | 4.990  | 5.545  | 5.115  | 5.803  | 5.717  |    |
| Marveld3       | 0.034 | -0.771 | 1.838  | 2.147  | 1.525  | 1.842  | 2.609  | 2.383  | 2.513  | 2.930  | Up |
| Agbl3          | 0.018 | -0.774 | 0.105  | 0.212  | -0.265 | 0.368  | 0.879  | 0.890  | 0.767  | 0.979  |    |
| 1700047117Rik2 | 0.021 | -0.775 | 1.617  | 1.876  | 1.354  | 1.621  | 2.392  | 2.650  | 2.150  | 2.375  |    |
| A630007B06Rik  | 0.008 | -0.775 | 3.812  | 3.894  | 3.679  | 3.862  | 4.587  | 4.309  | 4.771  | 4.680  |    |
| 4933427D14Rik  | 0.030 | -0.777 | 0.855  | 1.089  | 0.688  | 0.787  | 1.631  | 1.228  | 1.866  | 1.800  |    |
| Jmjd8          | 0.030 | -0.778 | 1.426  | 1.573  | 1.382  | 1.322  | 2.204  | 1.778  | 2.535  | 2.298  |    |
| Tmem258        | 0.014 | -0.780 | 4.870  | 4.984  | 4.827  | 4.799  | 5.651  | 5.379  | 5.592  | 5.981  |    |
| Cds2           | 0.031 | -0.789 | 1.107  | 1.404  | 0.869  | 1.046  | 1.895  | 1.529  | 2.058  | 2.098  |    |
| Tspyl4         | 0.035 | -0.789 | 0.939  | 1.170  | 0.503  | 1.144  | 1.728  | 1.478  | 1.834  | 1.873  |    |
| Gm15462        | 0.008 | -0.791 | -1.462 | -1.237 | -1.687 | -1.462 | -0.671 | -0.851 | -0.620 | -0.541 |    |
| Sec61b         | 0.030 | -0.793 | 4.754  | 5.091  | 4.714  | 4.458  | 5.547  | 5.243  | 5.636  | 5.763  |    |
| Gm8822         | 0.015 | -0.794 | 2.279  | 2.546  | 1.998  | 2.292  | 3.073  | 2.850  | 3.235  | 3.134  |    |
| Trak1          | 0.042 | -0.796 | 2.097  | 2.511  | 1.689  | 2.090  | 2.893  | 2.744  | 2.781  | 3.154  | Up |
| Lss            | 0.002 | -0.797 | 0.902  | 0.721  | 1.083  | 0.902  | 1.700  | 1.683  | 1.757  | 1.659  |    |
| Tada3          | 0.019 | -0.803 | 0.418  | 0.621  | 0.218  | 0.413  | 1.221  | 1.571  | 1.075  | 1.017  |    |
| Rbm15b         | 0.026 | -0.805 | -0.437 | -0.198 | -0.663 | -0.450 | 0.368  | 0.009  | 0.436  | 0.658  |    |
| Zfp169         | 0.030 | -0.807 | 0.713  | 1.038  | 0.750  | 0.351  | 1.520  | 1.802  | 1.327  | 1.431  |    |
| Prorsd1        | 0.028 | -0.810 | 0.800  | 0.944  | 0.561  | 0.896  | 1.610  | 1.719  | 1.903  | 1.208  |    |
| Hdac4          | 0.049 | -0.810 | -0.617 | -0.053 | -0.993 | -0.804 | 0.193  | 0.111  | 0.252  | 0.217  |    |
| Bcl9           | 0.041 | -0.810 | 2.471  | 2.913  | 2.006  | 2.495  | 3.281  | 3.172  | 3.239  | 3.432  |    |
| Atp7a          | 0.050 | -0.811 | 2.862  | 3.257  | 2.371  | 2.958  | 3.673  | 3.411  | 3.836  | 3.772  |    |
| Pigo           | 0.044 | -0.812 | -1.219 | -0.845 | -1.750 | -1.063 | -0.408 | -0.295 | -0.436 | -0.493 |    |
| Ctnnbip1       | 0.002 | -0.812 | 1.200  | 1.301  | 1.054  | 1.244  | 2.011  | 1.868  | 2.138  | 2.028  |    |
| Pank1          | 0.037 | -0.812 | 0.721  | 0.632  | 0.886  | 0.645  | 1.533  | 1.079  | 1.941  | 1.580  |    |
| Pdk1           | 0.020 | -0.813 | 1.067  | 0.726  | 1.394  | 1.082  | 1.880  | 1.741  | 2.072  | 1.827  | Up |

|               |       |        |        |        |        |        |        |        |        |        |      |
|---------------|-------|--------|--------|--------|--------|--------|--------|--------|--------|--------|------|
| 4930528D03Rik | 0.016 | -0.814 | -1.124 | -1.312 | -0.879 | -1.181 | -0.310 | -0.125 | -0.183 | -0.622 |      |
| Gm5446        | 0.049 | -0.816 | -0.818 | -0.312 | -1.163 | -0.980 | -0.002 | -0.197 | -0.071 | 0.261  |      |
| Surf1         | 0.005 | -0.817 | 1.313  | 1.595  | 1.180  | 1.163  | 2.130  | 2.094  | 2.203  | 2.093  |      |
| Gm21917       | 0.024 | -0.818 | -0.448 | -0.203 | -0.480 | -0.660 | 0.370  | 0.030  | 0.392  | 0.687  |      |
| Foxred1       | 0.016 | -0.818 | 0.681  | 0.894  | 0.694  | 0.456  | 1.499  | 1.280  | 1.814  | 1.402  |      |
| Xylt1         | 0.002 | -0.818 | -1.187 | -1.031 | -1.231 | -1.300 | -0.369 | -0.212 | -0.437 | -0.457 |      |
| Gm15982       | 0.012 | -0.820 | 1.836  | 2.117  | 1.589  | 1.802  | 2.656  | 2.442  | 2.784  | 2.741  |      |
| Tmc5          | 0.010 | -0.820 | 2.914  | 3.111  | 2.888  | 2.742  | 3.734  | 3.810  | 3.457  | 3.936  |      |
| Ears2         | 0.006 | -0.824 | -0.362 | -0.067 | -0.501 | -0.519 | 0.461  | 0.380  | 0.470  | 0.533  |      |
| Bcl2l2        | 0.038 | -0.824 | 1.120  | 1.225  | 0.815  | 1.319  | 1.944  | 1.503  | 2.189  | 2.140  |      |
| Gm17228       | 0.015 | -0.824 | 0.291  | 0.242  | 0.563  | 0.069  | 1.115  | 0.917  | 1.384  | 1.045  |      |
| Lca5          | 0.037 | -0.824 | -0.491 | -0.381 | -0.979 | -0.112 | 0.333  | 0.287  | 0.231  | 0.482  |      |
| Trappc9       | 0.018 | -0.825 | -1.440 | -1.290 | -1.634 | -1.396 | -0.614 | -0.764 | -0.240 | -0.839 |      |
| Pxmp4         | 0.034 | -0.826 | -0.573 | -0.366 | -0.888 | -0.464 | 0.254  | -0.149 | 0.388  | 0.522  | Up   |
| Tsga10        | 0.048 | -0.826 | 2.501  | 2.529  | 2.080  | 2.892  | 3.327  | 3.015  | 3.342  | 3.625  | Up   |
| Bend7         | 0.033 | -0.828 | 1.369  | 1.537  | 0.908  | 1.663  | 2.197  | 1.978  | 2.269  | 2.344  |      |
| Piga          | 0.028 | -0.832 | 0.807  | 0.655  | 0.691  | 1.074  | 1.639  | 1.423  | 1.439  | 2.055  |      |
| Camta1        | 0.038 | -0.833 | 2.862  | 2.875  | 2.757  | 2.954  | 3.695  | 3.199  | 4.114  | 3.771  |      |
| Hspa13        | 0.008 | -0.835 | 3.255  | 3.436  | 3.107  | 3.224  | 4.091  | 3.817  | 4.261  | 4.195  |      |
| Extl2         | 0.023 | -0.837 | 1.169  | 1.337  | 0.949  | 1.221  | 2.006  | 1.602  | 2.262  | 2.153  |      |
| Mrp63         | 0.006 | -0.837 | 1.305  | 1.438  | 1.159  | 1.318  | 2.142  | 1.941  | 2.090  | 2.394  |      |
| Tvp23b        | 0.018 | -0.838 | 4.927  | 4.929  | 4.795  | 5.056  | 5.764  | 5.360  | 5.983  | 5.950  |      |
| Tmem167       | 0.008 | -0.841 | 1.883  | 1.967  | 1.766  | 1.916  | 2.724  | 2.465  | 3.018  | 2.688  |      |
| D17Wsu104e    | 0.026 | -0.842 | 2.916  | 2.747  | 3.009  | 2.991  | 3.758  | 3.436  | 3.635  | 4.202  |      |
| Zfp738        | 0.007 | -0.845 | 2.177  | 2.295  | 1.880  | 2.358  | 3.022  | 2.968  | 2.945  | 3.153  |      |
| Pfdn1         | 0.046 | -0.847 | -0.361 | 0.130  | -0.630 | -0.584 | 0.486  | 0.346  | 0.293  | 0.818  |      |
| Zfp458        | 0.034 | -0.847 | -0.176 | -0.183 | -0.542 | 0.197  | 0.671  | 0.791  | 0.869  | 0.354  |      |
| Ap3m1-ps      | 0.046 | -0.848 | -0.299 | 0.032  | -0.514 | -0.415 | 0.549  | 0.246  | 1.033  | 0.366  |      |
| Zfp583        | 0.029 | -0.849 | -0.340 | -0.410 | -0.297 | -0.314 | 0.508  | 0.863  | 0.639  | 0.023  |      |
| Osbpl2        | 0.021 | -0.849 | 1.455  | 1.779  | 1.108  | 1.476  | 2.303  | 2.469  | 2.378  | 2.062  |      |
| Arf3          | 0.037 | -0.850 | 5.603  | 5.935  | 5.244  | 5.630  | 6.453  | 6.082  | 6.555  | 6.722  |      |
| Rwdd4a        | 0.042 | -0.851 | 3.833  | 3.867  | 3.586  | 4.048  | 4.685  | 4.175  | 4.896  | 4.982  |      |
| Prnp          | 0.043 | -0.852 | 3.003  | 2.952  | 2.657  | 3.399  | 3.854  | 3.460  | 4.053  | 4.050  |      |
| Adck2         | 0.048 | -0.852 | 0.722  | 0.960  | 0.362  | 0.845  | 1.574  | 1.632  | 1.134  | 1.958  |      |
| Elovl6        | 0.015 | -0.854 | -0.117 | -0.323 | 0.195  | -0.222 | 0.737  | 0.542  | 0.670  | 1.001  |      |
| Zfyve21       | 0.044 | -0.855 | 0.499  | 0.456  | 0.735  | 0.307  | 1.354  | 1.281  | 1.848  | 0.933  |      |
| Tbc1d30       | 0.046 | -0.855 | 0.419  | 0.536  | -0.005 | 0.726  | 1.274  | 1.139  | 1.007  | 1.675  |      |
| Med12l        | 0.038 | -0.855 | 0.835  | 0.616  | 0.728  | 1.160  | 1.690  | 1.383  | 1.559  | 2.128  |      |
| Snx30         | 0.011 | -0.859 | 0.685  | 0.951  | 0.579  | 0.523  | 1.543  | 1.275  | 1.624  | 1.732  |      |
| Nmnat1        | 0.029 | -0.860 | -1.882 | -1.623 | -2.297 | -1.726 | -1.022 | -1.189 | -0.724 | -1.153 |      |
| Pdxdc1        | 0.037 | -0.860 | 3.598  | 3.488  | 3.927  | 3.377  | 4.458  | 4.241  | 4.226  | 4.906  |      |
| Pttg1ip       | 0.006 | -0.860 | 2.235  | 2.452  | 2.004  | 2.249  | 3.095  | 2.897  | 3.175  | 3.214  |      |
| Fam222a       | 0.023 | -0.860 | -1.197 | -0.786 | -1.409 | -1.396 | -0.337 | -0.547 | -0.128 | -0.335 |      |
| Mtfr1l        | 0.045 | -0.861 | 1.262  | 1.506  | 0.818  | 1.462  | 2.123  | 1.743  | 2.214  | 2.412  |      |
| Ddx50         | 0.026 | -0.862 | 3.669  | 3.924  | 3.336  | 3.745  | 4.531  | 4.215  | 4.534  | 4.842  |      |
| AY036118      | 0.024 | -0.864 | -1.545 | -1.288 | -1.730 | -1.616 | -0.681 | -0.468 | -0.486 | -1.089 | Down |
| 6430590A07Rik | 0.010 | -0.864 | 2.118  | 2.173  | 1.821  | 2.359  | 2.982  | 3.150  | 2.814  | 2.983  |      |
| Ttbk2         | 0.041 | -0.865 | 1.670  | 1.728  | 1.183  | 2.098  | 2.535  | 2.297  | 2.641  | 2.667  |      |
| Cyp4f13       | 0.031 | -0.865 | 0.248  | 0.681  | 0.108  | -0.044 | 1.114  | 0.837  | 1.171  | 1.332  |      |
| Ubxn4         | 0.035 | -0.866 | 3.929  | 4.102  | 3.553  | 4.132  | 4.795  | 4.396  | 5.052  | 4.937  |      |
| Sec61a1       | 0.011 | -0.867 | 3.939  | 4.192  | 3.806  | 3.819  | 4.805  | 4.566  | 4.775  | 5.075  |      |
| C2cd5         | 0.039 | -0.867 | 2.623  | 2.724  | 2.277  | 2.867  | 3.489  | 3.038  | 3.695  | 3.735  |      |
| Dennd4c       | 0.047 | -0.867 | 3.300  | 3.549  | 2.863  | 3.487  | 4.167  | 3.751  | 4.309  | 4.441  |      |
| Syt16         | 0.030 | -0.868 | -0.072 | 0.136  | -0.196 | -0.156 | 0.795  | 0.331  | 0.921  | 1.134  |      |
| Ppp2r3a       | 0.027 | -0.868 | 1.728  | 1.827  | 1.544  | 1.814  | 2.596  | 2.189  | 2.586  | 3.014  |      |
| Scfd1         | 0.025 | -0.870 | 3.725  | 3.732  | 3.463  | 3.981  | 4.595  | 4.201  | 4.801  | 4.782  |      |

|               |       |        |        |        |        |        |        |        |        |        |      |
|---------------|-------|--------|--------|--------|--------|--------|--------|--------|--------|--------|------|
| Gm10031       | 0.029 | -0.871 | 0.757  | 0.917  | 0.688  | 0.665  | 1.628  | 1.135  | 1.836  | 1.913  |      |
| Map2k2        | 0.003 | -0.871 | 0.005  | 0.134  | 0.130  | -0.250 | 0.876  | 0.895  | 0.918  | 0.815  |      |
| Pno1          | 0.012 | -0.872 | 1.310  | 1.131  | 1.215  | 1.583  | 2.181  | 2.194  | 2.419  | 1.930  |      |
| Gosr2         | 0.047 | -0.872 | 2.711  | 3.007  | 2.351  | 2.776  | 3.583  | 3.135  | 3.953  | 3.662  |      |
| Ret           | 0.037 | -0.872 | -0.007 | 0.188  | -0.372 | 0.163  | 0.865  | 0.493  | 1.240  | 0.863  |      |
| Gm11889       | 0.020 | -0.872 | -1.528 | -1.704 | -1.186 | -1.694 | -0.655 | -0.962 | -0.453 | -0.551 |      |
| Sod1          | 0.022 | -0.875 | 7.362  | 7.441  | 7.451  | 7.195  | 8.237  | 7.788  | 8.399  | 8.522  |      |
| Memo1         | 0.014 | -0.875 | 3.444  | 3.588  | 3.285  | 3.460  | 4.319  | 3.937  | 4.476  | 4.543  |      |
| Ssr3          | 0.016 | -0.877 | 6.359  | 6.437  | 6.438  | 6.203  | 7.236  | 6.835  | 7.382  | 7.491  |      |
| Klhl22        | 0.039 | -0.878 | 2.094  | 2.427  | 1.830  | 2.025  | 2.973  | 2.567  | 2.987  | 3.364  |      |
| Mttp          | 0.033 | -0.879 | -0.747 | -0.804 | -0.804 | -0.632 | 0.132  | -0.143 | 0.667  | -0.127 |      |
| 6720401G13Rik | 0.003 | -0.879 | 2.126  | 2.179  | 1.993  | 2.206  | 3.005  | 3.094  | 3.158  | 2.763  |      |
| Acvr1         | 0.027 | -0.879 | 0.904  | 1.110  | 0.739  | 0.864  | 1.784  | 1.581  | 1.521  | 2.249  |      |
| Lrrc47        | 0.027 | -0.879 | 1.639  | 1.919  | 1.353  | 1.645  | 2.518  | 2.118  | 2.730  | 2.708  |      |
| Fry           | 0.046 | -0.880 | -0.843 | -0.438 | -1.344 | -0.746 | 0.037  | -0.262 | 0.122  | 0.250  |      |
| Zc3h7a        | 0.021 | -0.880 | 5.022  | 5.103  | 4.763  | 5.199  | 5.902  | 5.509  | 6.166  | 6.029  |      |
| Ndufv3        | 0.010 | -0.880 | 2.615  | 2.827  | 2.692  | 2.326  | 3.495  | 3.288  | 3.511  | 3.687  |      |
| Glrx          | 0.034 | -0.882 | 3.602  | 4.026  | 3.240  | 3.539  | 4.484  | 4.239  | 4.428  | 4.783  |      |
| Plekkg3       | 0.045 | -0.882 | 0.019  | 0.500  | -0.142 | -0.299 | 0.901  | 0.550  | 0.973  | 1.180  | Up   |
| Serp1         | 0.032 | -0.884 | 4.683  | 4.704  | 5.023  | 4.322  | 5.567  | 5.203  | 5.730  | 5.769  |      |
| Slc12a9       | 0.016 | -0.887 | -0.883 | -0.658 | -0.892 | -1.100 | 0.004  | -0.039 | 0.335  | -0.286 |      |
| Ocel1         | 0.023 | -0.887 | -1.562 | -1.099 | -1.690 | -1.896 | -0.674 | -0.538 | -0.755 | -0.730 |      |
| Copb2         | 0.014 | -0.888 | 4.837  | 4.927  | 4.636  | 4.949  | 5.725  | 5.353  | 5.865  | 5.958  |      |
| Gm26617       | 0.009 | -0.890 | 2.366  | 2.549  | 2.029  | 2.519  | 3.255  | 3.108  | 3.285  | 3.373  |      |
| Cenpv         | 0.000 | -0.890 | 0.246  | 0.360  | 0.177  | 0.200  | 1.136  | 1.050  | 1.169  | 1.189  |      |
| Tapbpl        | 0.010 | -0.890 | 1.115  | 1.248  | 0.959  | 1.137  | 2.005  | 1.727  | 1.958  | 2.330  |      |
| Abca5         | 0.045 | -0.891 | 1.722  | 1.876  | 1.131  | 2.158  | 2.613  | 2.520  | 2.652  | 2.667  |      |
| Hyi           | 0.003 | -0.891 | 1.083  | 1.177  | 1.210  | 0.862  | 1.974  | 1.804  | 2.012  | 2.106  |      |
| Ptprz1        | 0.042 | -0.894 | -0.967 | -0.635 | -1.553 | -0.712 | -0.073 | -0.156 | -0.137 | 0.075  |      |
| Hist1h1d      | 0.005 | -0.895 | 0.257  | 0.149  | 0.286  | 0.335  | 1.152  | 0.966  | 1.448  | 1.040  |      |
| Hykk          | 0.019 | -0.898 | -0.814 | -1.161 | -0.552 | -0.730 | 0.084  | 0.018  | -0.142 | 0.376  |      |
| Rnf170        | 0.002 | -0.899 | 2.072  | 2.107  | 1.869  | 2.239  | 2.971  | 2.914  | 2.885  | 3.112  |      |
| Rpn2          | 0.046 | -0.900 | 4.345  | 4.631  | 4.155  | 4.250  | 5.245  | 4.719  | 5.667  | 5.351  |      |
| Gm18294       | 0.003 | -0.903 | -1.623 | -1.703 | -1.752 | -1.416 | -0.721 | -0.629 | -0.609 | -0.924 |      |
| Ergic1        | 0.007 | -0.903 | 1.873  | 1.666  | 2.143  | 1.810  | 2.776  | 2.672  | 2.669  | 2.986  |      |
| Tmem164       | 0.034 | -0.903 | 2.611  | 2.939  | 2.510  | 2.385  | 3.515  | 3.075  | 3.865  | 3.604  |      |
| Stox2         | 0.029 | -0.905 | 1.426  | 1.488  | 1.132  | 1.658  | 2.331  | 1.923  | 2.683  | 2.386  | Up   |
| Phyh          | 0.045 | -0.906 | 3.601  | 3.928  | 3.037  | 3.838  | 4.506  | 4.232  | 4.683  | 4.604  |      |
| Slc6a6        | 0.050 | -0.907 | 2.892  | 3.297  | 2.662  | 2.717  | 3.798  | 3.289  | 4.070  | 4.036  |      |
| Dad1          | 0.008 | -0.907 | 2.954  | 3.129  | 2.928  | 2.805  | 3.861  | 3.547  | 4.003  | 4.032  |      |
| Slc39a13      | 0.017 | -0.908 | -0.225 | -0.317 | -0.120 | -0.238 | 0.682  | 1.116  | 0.389  | 0.542  |      |
| Gm26945       | 0.021 | -0.908 | 2.456  | 2.727  | 1.968  | 2.672  | 3.364  | 3.371  | 3.343  | 3.378  |      |
| Larp1b        | 0.015 | -0.909 | 1.372  | 1.281  | 1.659  | 1.175  | 2.281  | 1.972  | 2.556  | 2.315  |      |
| Slc4a7        | 0.022 | -0.910 | 2.308  | 2.564  | 2.015  | 2.346  | 3.219  | 2.869  | 3.528  | 3.259  |      |
| Gm10025       | 0.031 | -0.914 | 3.679  | 3.444  | 3.538  | 4.054  | 4.593  | 4.765  | 4.184  | 4.829  |      |
| Panx1         | 0.037 | -0.915 | -1.330 | -1.645 | -1.582 | -0.765 | -0.416 | -0.592 | -0.320 | -0.335 | Down |
| Pgap1         | 0.029 | -0.915 | 3.207  | 3.466  | 2.757  | 3.399  | 4.123  | 3.814  | 4.286  | 4.267  |      |
| Wdr34         | 0.039 | -0.919 | -0.949 | -0.719 | -1.303 | -0.825 | -0.030 | 0.347  | 0.052  | -0.488 |      |
| Oat           | 0.026 | -0.920 | 1.811  | 1.934  | 1.815  | 1.684  | 2.731  | 2.259  | 2.796  | 3.136  | Down |
| Ap3m1         | 0.038 | -0.920 | 2.166  | 2.293  | 1.675  | 2.530  | 3.086  | 2.828  | 3.380  | 3.052  |      |
| Pcsk6         | 0.037 | -0.923 | -1.617 | -1.489 | -2.026 | -1.336 | -0.694 | -0.896 | -0.261 | -0.925 | Up   |
| F2rl1         | 0.027 | -0.924 | 1.538  | 1.656  | 1.157  | 1.803  | 2.462  | 2.089  | 2.628  | 2.670  | Up   |
| Arhgef16      | 0.019 | -0.924 | -1.292 | -1.396 | -1.306 | -1.174 | -0.368 | -0.837 | -0.100 | -0.167 | Up   |
| BC026590      | 0.022 | -0.925 | 0.645  | 0.882  | 0.375  | 0.676  | 1.569  | 1.201  | 1.582  | 1.925  |      |
| 2010012O05Rik | 0.028 | -0.926 | 0.503  | 0.930  | 0.008  | 0.571  | 1.429  | 1.496  | 1.485  | 1.306  |      |
| Edem2         | 0.013 | -0.927 | 1.379  | 1.728  | 1.124  | 1.285  | 2.306  | 2.080  | 2.328  | 2.510  |      |

|               |       |        |        |        |        |        |        |        |        |        |      |
|---------------|-------|--------|--------|--------|--------|--------|--------|--------|--------|--------|------|
| Ap1s1         | 0.035 | -0.929 | 1.113  | 1.466  | 0.797  | 1.075  | 2.041  | 1.900  | 1.742  | 2.482  |      |
| Mageh1        | 0.025 | -0.930 | 4.692  | 4.733  | 4.369  | 4.975  | 5.622  | 5.220  | 5.844  | 5.802  |      |
| Daam1         | 0.031 | -0.932 | 2.493  | 2.829  | 2.051  | 2.599  | 3.425  | 3.095  | 3.549  | 3.631  |      |
| Tspan13       | 0.010 | -0.934 | 2.856  | 2.901  | 2.662  | 3.005  | 3.789  | 3.463  | 3.832  | 4.073  |      |
| Mis12         | 0.017 | -0.935 | 2.778  | 2.719  | 2.941  | 2.675  | 3.713  | 3.269  | 3.956  | 3.913  |      |
| Rcan3         | 0.042 | -0.935 | 2.541  | 3.051  | 2.158  | 2.415  | 3.476  | 3.133  | 3.693  | 3.602  |      |
| Stx5a         | 0.044 | -0.935 | 3.533  | 3.929  | 3.080  | 3.590  | 4.468  | 4.054  | 4.666  | 4.686  |      |
| Gm26514       | 0.028 | -0.936 | 0.714  | 0.831  | 0.287  | 1.022  | 1.650  | 1.371  | 1.952  | 1.627  |      |
| Ankzf1        | 0.034 | -0.937 | -0.366 | -0.222 | -0.477 | -0.398 | 0.571  | 0.068  | 0.589  | 1.056  |      |
| Yif1a         | 0.039 | -0.937 | -1.637 | -1.047 | -2.074 | -1.791 | -0.700 | -0.807 | -0.632 | -0.662 |      |
| Ccdc104       | 0.023 | -0.940 | 4.370  | 4.647  | 3.943  | 4.519  | 5.310  | 5.058  | 5.308  | 5.563  |      |
| Gm5499        | 0.041 | -0.941 | -0.545 | -0.539 | -0.868 | -0.227 | 0.396  | -0.116 | 0.619  | 0.686  |      |
| Dnajc10       | 0.019 | -0.942 | 5.667  | 5.882  | 5.319  | 5.802  | 6.609  | 6.268  | 6.756  | 6.804  |      |
| Six5          | 0.022 | -0.943 | -1.483 | -1.524 | -1.881 | -1.045 | -0.540 | -0.384 | -0.531 | -0.707 | Up   |
| Zfp277        | 0.003 | -0.945 | 2.250  | 2.207  | 2.063  | 2.479  | 3.194  | 3.243  | 3.029  | 3.311  |      |
| Golgb1        | 0.030 | -0.945 | 4.289  | 4.415  | 3.900  | 4.552  | 5.235  | 4.827  | 5.385  | 5.492  |      |
| Spcs3         | 0.012 | -0.946 | 4.171  | 4.161  | 4.181  | 4.170  | 5.117  | 4.690  | 5.383  | 5.278  |      |
| Zfp719        | 0.028 | -0.947 | 0.774  | 0.692  | 0.364  | 1.265  | 1.721  | 1.527  | 1.787  | 1.849  |      |
| Pex26         | 0.031 | -0.950 | 1.302  | 1.550  | 0.886  | 1.470  | 2.252  | 1.945  | 2.181  | 2.629  | Up   |
| Nipa1         | 0.016 | -0.951 | -0.762 | -0.317 | -0.922 | -1.049 | 0.189  | 0.152  | 0.077  | 0.339  |      |
| Tbcb          | 0.024 | -0.953 | 4.151  | 4.478  | 3.983  | 3.993  | 5.104  | 4.701  | 5.177  | 5.434  |      |
| 2610524H06Rik | 0.001 | -0.953 | 2.677  | 2.826  | 2.702  | 2.504  | 3.630  | 3.599  | 3.779  | 3.514  |      |
| Fra10ac1      | 0.044 | -0.954 | 1.963  | 2.085  | 1.715  | 2.089  | 2.917  | 2.411  | 2.875  | 3.466  |      |
| Dhrs4         | 0.042 | -0.955 | 3.386  | 3.555  | 3.092  | 3.510  | 4.340  | 3.792  | 4.774  | 4.454  |      |
| Stt3a         | 0.015 | -0.955 | 7.578  | 7.595  | 7.643  | 7.495  | 8.533  | 8.094  | 8.646  | 8.858  |      |
| Cerkl         | 0.007 | -0.955 | 3.231  | 3.458  | 2.874  | 3.360  | 4.186  | 4.117  | 4.139  | 4.302  |      |
| Pofut2        | 0.036 | -0.955 | 0.486  | 1.008  | 0.084  | 0.367  | 1.441  | 1.163  | 1.571  | 1.591  |      |
| Ufm1          | 0.034 | -0.958 | 3.041  | 3.377  | 2.732  | 3.014  | 3.999  | 3.534  | 4.317  | 4.146  |      |
| BC037034      | 0.043 | -0.962 | -0.488 | -0.421 | -0.212 | -0.829 | 0.474  | 0.315  | 0.102  | 1.005  |      |
| Gm13695       | 0.049 | -0.963 | -0.849 | -0.570 | -1.509 | -0.468 | 0.114  | 0.060  | 0.297  | -0.015 |      |
| Fabp3-ps1     | 0.037 | -0.965 | -2.227 | -1.729 | -2.533 | -2.420 | -1.262 | -1.495 | -1.398 | -0.893 |      |
| AI597468      | 0.008 | -0.966 | 4.184  | 4.338  | 3.891  | 4.323  | 5.150  | 4.893  | 5.311  | 5.244  |      |
| Gm14325       | 0.044 | -0.968 | 1.590  | 1.363  | 1.544  | 1.862  | 2.557  | 2.389  | 2.145  | 3.138  |      |
| Smim1         | 0.016 | -0.969 | 1.128  | 1.318  | 0.890  | 1.176  | 2.097  | 1.709  | 2.407  | 2.174  | Down |
| Paqr9         | 0.011 | -0.969 | -0.881 | -0.596 | -1.282 | -0.764 | 0.088  | -0.038 | 0.118  | 0.185  |      |
| Calr          | 0.011 | -0.970 | 6.276  | 6.363  | 6.252  | 6.213  | 7.246  | 6.826  | 7.428  | 7.483  |      |
| Clptm1l       | 0.045 | -0.970 | 0.907  | 1.251  | 0.668  | 0.803  | 1.877  | 1.368  | 1.908  | 2.356  |      |
| Fam184a       | 0.007 | -0.971 | 0.497  | 0.644  | 0.454  | 0.395  | 1.468  | 1.777  | 1.443  | 1.185  |      |
| Golga3        | 0.036 | -0.971 | 2.032  | 2.327  | 1.588  | 2.181  | 3.003  | 2.672  | 2.924  | 3.413  |      |
| Ank2          | 0.032 | -0.972 | 1.938  | 2.275  | 1.571  | 1.967  | 2.909  | 2.608  | 2.780  | 3.340  |      |
| Zfp952        | 0.045 | -0.975 | 1.465  | 1.814  | 1.313  | 1.267  | 2.440  | 2.013  | 2.316  | 2.991  |      |
| Ccdc148       | 0.007 | -0.977 | 0.447  | 0.352  | 0.256  | 0.733  | 1.424  | 1.365  | 1.235  | 1.671  |      |
| Sacs          | 0.005 | -0.979 | -0.210 | 0.067  | -0.499 | -0.198 | 0.768  | 0.629  | 0.855  | 0.821  | Down |
| Tbl2          | 0.032 | -0.980 | 0.981  | 1.154  | 0.964  | 0.826  | 1.961  | 1.398  | 2.145  | 2.341  |      |
| Zfp142        | 0.019 | -0.980 | 1.591  | 1.697  | 1.185  | 1.890  | 2.571  | 2.284  | 2.642  | 2.786  |      |
| Abhd3         | 0.021 | -0.980 | 0.379  | 0.714  | 0.158  | 0.267  | 1.360  | 1.300  | 1.041  | 1.738  |      |
| Gm10177       | 0.028 | -0.983 | 2.637  | 2.412  | 2.965  | 2.534  | 3.620  | 3.168  | 3.985  | 3.708  |      |
| Mapk8ip3      | 0.041 | -0.985 | 2.699  | 3.133  | 2.295  | 2.669  | 3.684  | 3.262  | 4.032  | 3.759  |      |
| Orc6          | 0.030 | -0.985 | 1.541  | 1.469  | 1.394  | 1.760  | 2.526  | 2.407  | 2.115  | 3.056  |      |
| Lgalsl        | 0.010 | -0.985 | 2.483  | 2.172  | 2.611  | 2.665  | 3.468  | 3.248  | 3.408  | 3.748  |      |
| Ssr2          | 0.025 | -0.986 | 4.654  | 4.753  | 4.720  | 4.489  | 5.640  | 5.107  | 5.956  | 5.857  |      |
| Aff1          | 0.031 | -0.986 | 1.610  | 2.141  | 1.348  | 1.341  | 2.596  | 2.345  | 2.846  | 2.598  |      |
| Slc35e3       | 0.016 | -0.987 | -0.646 | -0.353 | -0.729 | -0.857 | 0.341  | 0.119  | 0.174  | 0.730  |      |
| Tmem219       | 0.007 | -0.987 | 1.306  | 1.638  | 1.210  | 1.071  | 2.294  | 2.179  | 2.492  | 2.211  |      |
| 2810425M01Rik | 0.004 | -0.989 | -1.609 | -1.626 | -1.693 | -1.509 | -0.621 | -0.882 | -0.630 | -0.350 |      |
| Bccip         | 0.015 | -0.989 | 4.378  | 4.804  | 3.968  | 4.362  | 5.367  | 5.352  | 5.362  | 5.386  |      |

|               |       |        |        |        |        |        |        |        |        |        |    |
|---------------|-------|--------|--------|--------|--------|--------|--------|--------|--------|--------|----|
| Prkacb        | 0.019 | -0.989 | 2.716  | 2.922  | 2.379  | 2.847  | 3.705  | 3.315  | 3.856  | 3.944  |    |
| Ube2g2        | 0.041 | -0.992 | 1.117  | 1.394  | 0.740  | 1.215  | 2.109  | 1.570  | 2.427  | 2.330  |    |
| Selk          | 0.041 | -0.995 | 5.429  | 5.618  | 4.964  | 5.705  | 6.424  | 5.942  | 6.669  | 6.661  |    |
| Ddost         | 0.025 | -0.997 | 2.916  | 2.935  | 2.665  | 3.149  | 3.914  | 3.421  | 4.081  | 4.239  |    |
| Fkbp9         | 0.014 | -0.998 | 2.364  | 2.607  | 2.206  | 2.279  | 3.361  | 2.979  | 3.421  | 3.685  |    |
| Cyb5d2        | 0.044 | -0.998 | -1.003 | -1.114 | -0.708 | -1.187 | -0.005 | -0.439 | -0.169 | 0.594  |    |
| Prdx3         | 0.043 | -1.000 | 1.228  | 1.508  | 1.031  | 1.144  | 2.228  | 1.688  | 2.237  | 2.760  |    |
| Ccdc149       | 0.010 | -1.008 | -0.676 | -0.633 | -0.986 | -0.409 | 0.332  | 0.236  | 0.144  | 0.615  |    |
| Prkar2b       | 0.013 | -1.009 | 1.613  | 1.981  | 1.329  | 1.529  | 2.621  | 2.413  | 2.584  | 2.867  |    |
| Ftx           | 0.034 | -1.009 | 1.044  | 1.318  | 1.091  | 0.723  | 2.053  | 1.715  | 2.582  | 1.862  |    |
| Zfp958        | 0.047 | -1.010 | -0.009 | -0.332 | 0.204  | 0.102  | 1.001  | 0.400  | 1.464  | 1.140  |    |
| Prps1         | 0.029 | -1.010 | 3.748  | 3.828  | 3.212  | 4.204  | 4.758  | 4.587  | 4.858  | 4.829  |    |
| Slc35b1       | 0.044 | -1.010 | 2.805  | 3.152  | 2.242  | 3.021  | 3.815  | 3.542  | 3.701  | 4.203  |    |
| Wars          | 0.010 | -1.011 | 1.124  | 1.287  | 0.931  | 1.154  | 2.135  | 1.765  | 2.427  | 2.213  |    |
| 4833439L19Rik | 0.036 | -1.013 | 3.711  | 4.005  | 3.199  | 3.930  | 4.724  | 4.322  | 4.932  | 4.918  |    |
| Cage1         | 0.023 | -1.014 | -1.641 | -1.292 | -1.606 | -2.026 | -0.627 | -0.792 | -0.255 | -0.834 |    |
| Vamp2         | 0.043 | -1.015 | 3.475  | 3.908  | 2.931  | 3.587  | 4.491  | 4.110  | 4.604  | 4.759  |    |
| Sec11c        | 0.027 | -1.016 | 5.463  | 5.461  | 5.381  | 5.546  | 6.478  | 5.898  | 6.705  | 6.832  |    |
| Sec14l1       | 0.045 | -1.016 | 0.447  | 0.937  | 0.443  | -0.039 | 1.463  | 1.038  | 1.646  | 1.706  |    |
| Rfk           | 0.009 | -1.017 | 2.834  | 2.892  | 2.479  | 3.130  | 3.851  | 3.670  | 3.977  | 3.904  |    |
| Asb1          | 0.043 | -1.018 | -0.554 | -0.315 | -1.196 | -0.152 | 0.464  | 0.514  | 0.231  | 0.646  |    |
| Steap2        | 0.005 | -1.019 | 1.882  | 2.174  | 1.895  | 1.578  | 2.902  | 2.853  | 2.816  | 3.036  | Up |
| Gm20463       | 0.004 | -1.021 | 4.647  | 4.757  | 4.570  | 4.614  | 5.668  | 5.354  | 5.811  | 5.839  |    |
| Copa          | 0.028 | -1.022 | 4.404  | 4.690  | 3.951  | 4.570  | 5.425  | 5.048  | 5.505  | 5.723  |    |
| Arhgef40      | 0.017 | -1.023 | 0.503  | 0.957  | 0.191  | 0.360  | 1.525  | 1.362  | 1.465  | 1.749  |    |
| Atrip         | 0.035 | -1.025 | -1.298 | -1.724 | -0.687 | -1.482 | -0.273 | -0.206 | -0.154 | -0.459 |    |
| A530032D15Rik | 0.048 | -1.026 | -0.200 | 0.248  | -0.920 | 0.070  | 0.826  | 0.780  | 0.875  | 0.823  |    |
| Sec31a        | 0.018 | -1.027 | 4.966  | 5.100  | 4.901  | 4.895  | 5.992  | 5.480  | 6.258  | 6.239  |    |
| Ift20         | 0.009 | -1.028 | 5.119  | 5.423  | 4.968  | 4.968  | 6.147  | 5.866  | 6.192  | 6.384  |    |
| Cuta          | 0.045 | -1.029 | 2.787  | 3.019  | 2.582  | 2.758  | 3.815  | 3.145  | 4.129  | 4.171  |    |
| Sorbs2        | 0.018 | -1.031 | 4.074  | 4.201  | 3.776  | 4.246  | 5.105  | 4.698  | 5.175  | 5.442  |    |
| Bicd1         | 0.025 | -1.032 | 3.074  | 3.404  | 2.621  | 3.197  | 4.106  | 3.785  | 4.402  | 4.132  |    |
| Qtrtd1        | 0.016 | -1.032 | 2.394  | 2.676  | 2.334  | 2.174  | 3.427  | 3.007  | 3.629  | 3.644  |    |
| Kcnk16        | 0.018 | -1.032 | 1.339  | 1.637  | 0.933  | 1.446  | 2.371  | 2.137  | 2.289  | 2.687  |    |
| Rom1          | 0.039 | -1.032 | -1.525 | -1.776 | -1.888 | -0.910 | -0.492 | -0.651 | -0.210 | -0.616 |    |
| Sec61g        | 0.035 | -1.033 | 4.320  | 4.189  | 4.651  | 4.119  | 5.353  | 4.806  | 5.757  | 5.495  |    |
| Tspyl5        | 0.007 | -1.034 | 0.166  | 0.355  | -0.080 | 0.223  | 1.200  | 0.915  | 1.217  | 1.469  |    |
| Recql         | 0.017 | -1.039 | 2.648  | 3.097  | 2.659  | 2.188  | 3.686  | 3.766  | 3.660  | 3.634  |    |
| Kdelr2        | 0.006 | -1.040 | 3.143  | 3.277  | 3.265  | 2.887  | 4.183  | 3.901  | 4.234  | 4.413  |    |
| Vmac          | 0.014 | -1.042 | 0.093  | 0.462  | -0.274 | 0.090  | 1.135  | 0.868  | 1.235  | 1.302  |    |
| Mtmr4         | 0.017 | -1.042 | 1.115  | 1.431  | 0.808  | 1.107  | 2.158  | 1.768  | 2.307  | 2.398  |    |
| Nav2          | 0.035 | -1.042 | 3.817  | 4.112  | 3.240  | 4.099  | 4.859  | 4.530  | 5.028  | 5.021  | Up |
| D130017N08Rik | 0.010 | -1.043 | 0.589  | 0.969  | 0.487  | 0.310  | 1.632  | 1.405  | 1.735  | 1.757  |    |
| Atp5g1        | 0.021 | -1.044 | 2.505  | 2.764  | 2.518  | 2.233  | 3.549  | 3.078  | 3.727  | 3.841  |    |
| Bet1          | 0.014 | -1.045 | 3.473  | 3.435  | 3.162  | 3.822  | 4.518  | 4.243  | 4.803  | 4.507  |    |
| Gm15965       | 0.015 | -1.045 | 0.650  | 0.687  | 0.461  | 0.801  | 1.695  | 1.283  | 1.711  | 2.091  |    |
| BC068281      | 0.023 | -1.046 | -1.173 | -1.460 | -1.291 | -0.767 | -0.127 | -0.419 | -0.231 | 0.269  |    |
| Mapre3        | 0.037 | -1.048 | 1.819  | 2.166  | 1.319  | 1.972  | 2.867  | 2.434  | 2.997  | 3.169  |    |
| Kctd12        | 0.046 | -1.050 | 2.117  | 2.773  | 1.737  | 1.840  | 3.166  | 2.844  | 3.321  | 3.334  | Up |
| S100a1        | 0.017 | -1.050 | 1.152  | 1.588  | 0.962  | 0.905  | 2.202  | 2.023  | 2.507  | 2.075  | Up |
| 5031439G07Rik | 0.009 | -1.050 | 0.011  | 0.351  | -0.255 | -0.064 | 1.061  | 0.850  | 1.296  | 1.036  |    |
| Akap7         | 0.004 | -1.053 | 2.169  | 2.040  | 2.444  | 2.023  | 3.222  | 3.314  | 3.345  | 3.007  |    |
| ULK3          | 0.020 | -1.054 | 0.858  | 1.222  | 0.538  | 0.815  | 1.912  | 1.584  | 1.875  | 2.278  |    |
| Tbccd1        | 0.032 | -1.054 | -0.131 | 0.074  | -0.129 | -0.338 | 0.924  | 0.635  | 0.607  | 1.529  |    |
| Hivep3        | 0.013 | -1.057 | -0.057 | -0.275 | -0.020 | 0.125  | 1.000  | 0.864  | 0.707  | 1.430  |    |
| Gga2          | 0.027 | -1.058 | 2.652  | 2.777  | 2.259  | 2.919  | 3.709  | 3.275  | 3.775  | 4.078  |    |



|               |       |        |        |        |        |        |        |        |        |        |    |
|---------------|-------|--------|--------|--------|--------|--------|--------|--------|--------|--------|----|
| Entpd7        | 0.002 | -1.065 | 1.569  | 1.850  | 1.396  | 1.461  | 2.634  | 2.559  | 2.658  | 2.685  |    |
| Lyplal1       | 0.001 | -1.066 | 3.013  | 3.164  | 2.803  | 3.071  | 4.079  | 3.955  | 4.113  | 4.169  |    |
| Dnajc24       | 0.029 | -1.067 | 3.023  | 3.283  | 2.425  | 3.360  | 4.090  | 3.887  | 4.260  | 4.121  |    |
| Fkbp2         | 0.031 | -1.067 | 4.169  | 4.067  | 4.498  | 3.942  | 5.236  | 4.679  | 5.590  | 5.440  |    |
| Sgpp2         | 0.003 | -1.068 | 0.584  | 0.774  | 0.460  | 0.516  | 1.651  | 1.709  | 1.399  | 1.845  |    |
| Tenm3         | 0.007 | -1.069 | 0.336  | 0.264  | 0.079  | 0.663  | 1.404  | 1.188  | 1.597  | 1.428  | Up |
| Rint1         | 0.039 | -1.072 | 1.872  | 2.053  | 2.217  | 1.348  | 2.945  | 2.773  | 2.650  | 3.411  |    |
| Eif5a2        | 0.014 | -1.073 | 0.097  | -0.031 | 0.165  | 0.157  | 1.170  | 0.674  | 1.426  | 1.409  |    |
| Slc33a1       | 0.015 | -1.073 | 1.679  | 1.824  | 1.510  | 1.703  | 2.752  | 2.293  | 3.138  | 2.825  |    |
| Kcnj11        | 0.006 | -1.077 | -0.826 | -0.563 | -1.072 | -0.843 | 0.251  | 0.123  | 0.105  | 0.524  |    |
| Pigr          | 0.011 | -1.078 | -0.843 | -0.880 | -0.629 | -1.019 | 0.235  | 0.657  | 0.080  | -0.031 | Up |
| Pkp4          | 0.009 | -1.079 | 3.472  | 3.296  | 3.795  | 3.323  | 4.551  | 4.243  | 4.643  | 4.767  |    |
| Slc35b4       | 0.003 | -1.080 | 1.446  | 1.725  | 1.217  | 1.397  | 2.526  | 2.467  | 2.698  | 2.414  |    |
| Fhod3         | 0.031 | -1.081 | -1.041 | -1.335 | -1.326 | -0.462 | 0.039  | -0.261 | 0.107  | 0.273  | Up |
| Prep          | 0.009 | -1.083 | 1.307  | 1.344  | 1.483  | 1.095  | 2.391  | 2.047  | 2.732  | 2.394  | Up |
| Ppm1l         | 0.027 | -1.084 | 1.414  | 1.719  | 0.824  | 1.700  | 2.499  | 2.256  | 2.610  | 2.629  |    |
| Bpnt1         | 0.018 | -1.085 | 1.571  | 1.859  | 1.130  | 1.725  | 2.656  | 2.377  | 2.638  | 2.953  |    |
| Nme6          | 0.021 | -1.086 | -0.135 | -0.034 | -0.652 | 0.283  | 0.951  | 0.746  | 1.121  | 0.987  | Up |
| Dctn1         | 0.009 | -1.088 | 1.476  | 1.309  | 1.345  | 1.775  | 2.564  | 2.491  | 2.301  | 2.902  |    |
| Gm20632       | 0.012 | -1.091 | -1.912 | -1.870 | -1.919 | -1.946 | -0.821 | -0.882 | -1.214 | -0.367 |    |
| Epb4.1l1      | 0.030 | -1.091 | 0.256  | 0.488  | -0.181 | 0.460  | 1.347  | 1.248  | 1.815  | 0.977  |    |
| Clstn1        | 0.018 | -1.091 | -0.991 | -0.906 | -0.951 | -1.115 | 0.100  | -0.398 | 0.145  | 0.554  |    |
| Pou5f2        | 0.033 | -1.094 | 0.198  | -0.415 | 0.459  | 0.550  | 1.292  | 1.569  | 1.267  | 1.041  |    |
| Aph1a         | 0.039 | -1.098 | 0.012  | 0.152  | -0.407 | 0.291  | 1.109  | 0.525  | 1.454  | 1.350  |    |
| Tmem180       | 0.015 | -1.098 | -1.774 | -1.569 | -1.482 | -2.272 | -0.676 | -0.859 | -0.652 | -0.518 |    |
| Kctd11        | 0.032 | -1.098 | 0.563  | 0.997  | 0.323  | 0.370  | 1.661  | 1.142  | 1.993  | 1.849  |    |
| Fam101b       | 0.019 | -1.099 | 0.752  | 0.495  | 0.843  | 0.918  | 1.851  | 1.341  | 2.158  | 2.053  |    |
| Gpr180        | 0.006 | -1.104 | -0.313 | -0.546 | -0.046 | -0.348 | 0.790  | 0.556  | 0.752  | 1.063  |    |
| Ift27         | 0.046 | -1.105 | -1.409 | -1.297 | -0.976 | -1.956 | -0.304 | -0.233 | -0.781 | 0.101  |    |
| Slc9a7        | 0.037 | -1.106 | 1.852  | 2.141  | 1.279  | 2.137  | 2.958  | 2.537  | 3.248  | 3.089  |    |
| Smim14        | 0.014 | -1.106 | 3.021  | 3.092  | 2.617  | 3.353  | 4.126  | 3.951  | 4.423  | 4.005  |    |
| Hspa5         | 0.018 | -1.109 | 7.972  | 8.053  | 7.597  | 8.266  | 9.081  | 8.666  | 9.229  | 9.349  |    |
| Abtb2         | 0.005 | -1.111 | -1.751 | -1.875 | -1.658 | -1.719 | -0.640 | -0.746 | -0.271 | -0.902 | Up |
| Dzip1         | 0.026 | -1.111 | -1.785 | -1.261 | -2.150 | -1.943 | -0.674 | -0.953 | -0.716 | -0.351 |    |
| Srgap1        | 0.033 | -1.111 | 0.917  | 1.265  | 0.686  | 0.800  | 2.028  | 1.478  | 2.096  | 2.510  | Up |
| Zdhhc24       | 0.028 | -1.112 | 2.763  | 3.249  | 2.356  | 2.685  | 3.875  | 3.616  | 3.734  | 4.275  |    |
| Zfp949        | 0.025 | -1.113 | 2.689  | 2.497  | 2.448  | 3.122  | 3.802  | 3.570  | 3.566  | 4.271  |    |
| Slc16a12      | 0.027 | -1.117 | 1.922  | 2.130  | 1.383  | 2.253  | 3.038  | 2.686  | 3.126  | 3.304  |    |
| Tmem243       | 0.021 | -1.117 | -0.184 | 0.195  | -0.762 | 0.015  | 0.933  | 1.065  | 0.900  | 0.834  | Up |
| Kazn          | 0.022 | -1.119 | -0.038 | 0.241  | 0.255  | -0.610 | 1.081  | 1.002  | 1.306  | 0.934  | Up |
| Slc30a7       | 0.013 | -1.120 | 0.638  | 0.963  | 0.381  | 0.570  | 1.758  | 1.357  | 1.924  | 1.993  |    |
| Bet1l         | 0.045 | -1.124 | -0.790 | -0.113 | -0.817 | -1.441 | 0.334  | 0.321  | 0.210  | 0.471  |    |
| B830012L14Rik | 0.012 | -1.126 | 3.064  | 3.373  | 2.666  | 3.151  | 4.190  | 3.951  | 4.459  | 4.159  |    |
| Arl16         | 0.012 | -1.127 | -0.272 | -0.393 | -0.100 | -0.324 | 0.855  | 0.824  | 0.457  | 1.285  |    |
| Sec23b        | 0.039 | -1.128 | 2.896  | 3.274  | 2.413  | 3.001  | 4.024  | 3.747  | 3.754  | 4.572  |    |
| 4930565N06Rik | 0.015 | -1.133 | 3.211  | 3.244  | 2.731  | 3.659  | 4.344  | 4.276  | 4.476  | 4.280  |    |
| Zfp956        | 0.037 | -1.133 | -0.843 | -0.413 | -0.916 | -1.201 | 0.290  | -0.062 | 0.074  | 0.857  |    |
| Srpr          | 0.032 | -1.137 | 3.332  | 3.833  | 2.973  | 3.189  | 4.468  | 4.078  | 4.898  | 4.430  |    |
| St6galnac6    | 0.049 | -1.138 | -0.417 | 0.076  | -0.567 | -0.760 | 0.721  | 0.333  | 0.478  | 1.353  |    |
| Lman1         | 0.008 | -1.139 | 4.322  | 4.394  | 4.335  | 4.237  | 5.461  | 5.015  | 5.603  | 5.764  |    |
| Tram1         | 0.009 | -1.141 | 4.031  | 3.982  | 4.218  | 3.894  | 5.172  | 4.730  | 5.360  | 5.427  |    |
| Pced1b        | 0.006 | -1.142 | -0.640 | -0.865 | -0.709 | -0.347 | 0.501  | 0.212  | 0.653  | 0.639  |    |
| Lin7a         | 0.039 | -1.142 | -1.434 | -1.647 | -1.440 | -1.216 | -0.292 | -0.375 | 0.361  | -0.863 |    |
| Cdpf1         | 0.033 | -1.145 | -1.539 | -0.950 | -1.738 | -1.928 | -0.394 | -0.781 | -0.280 | -0.120 |    |
| Tmem203       | 0.031 | -1.149 | -0.584 | -0.660 | -0.326 | -0.766 | 0.565  | -0.044 | 0.664  | 1.075  |    |
| Nbas          | 0.045 | -1.152 | 1.595  | 1.775  | 0.984  | 2.025  | 2.747  | 2.270  | 2.860  | 3.110  |    |

|               |       |        |        |        |        |        |        |        |        |        |      |
|---------------|-------|--------|--------|--------|--------|--------|--------|--------|--------|--------|------|
| Cfb           | 0.042 | -1.153 | -1.811 | -2.275 | -1.939 | -1.218 | -0.658 | -1.133 | -0.413 | -0.426 |      |
| Gm26742       | 0.017 | -1.154 | -0.250 | 0.211  | -0.593 | -0.370 | 0.903  | 0.877  | 0.633  | 1.199  |      |
| Pag1          | 0.010 | -1.154 | 1.061  | 1.162  | 1.089  | 0.932  | 2.216  | 1.770  | 2.289  | 2.588  |      |
| Parp8         | 0.031 | -1.156 | 1.730  | 2.073  | 1.182  | 1.935  | 2.886  | 2.521  | 2.854  | 3.282  |      |
| Car8          | 0.013 | -1.157 | 0.781  | 0.679  | 0.676  | 0.988  | 1.937  | 1.499  | 1.949  | 2.364  |      |
| Gm26773       | 0.014 | -1.157 | 0.227  | 0.351  | -0.255 | 0.584  | 1.384  | 1.377  | 1.185  | 1.589  |      |
| Gmppb         | 0.033 | -1.158 | -0.865 | -1.467 | -0.330 | -0.799 | 0.293  | 0.009  | 0.509  | 0.360  |      |
| Ppp1r2-ps1    | 0.033 | -1.161 | -2.109 | -2.293 | -1.735 | -2.300 | -0.948 | -1.074 | -0.358 | -1.413 |      |
| Lrrc1         | 0.008 | -1.162 | 1.744  | 1.915  | 1.887  | 1.430  | 2.906  | 2.680  | 2.793  | 3.246  |      |
| E230016M11Rik | 0.032 | -1.163 | -0.583 | -0.163 | -0.793 | -0.793 | 0.580  | 0.951  | -0.001 | 0.788  |      |
| Ncam1         | 0.036 | -1.164 | 1.134  | 1.512  | 0.414  | 1.478  | 2.299  | 2.138  | 2.264  | 2.494  | Down |
| Cltb          | 0.049 | -1.164 | 0.987  | 1.396  | 0.422  | 1.143  | 2.151  | 1.558  | 2.437  | 2.458  |      |
| Rab33b        | 0.008 | -1.164 | 1.713  | 1.899  | 1.409  | 1.831  | 2.877  | 2.510  | 3.033  | 3.088  |      |
| St3gal5       | 0.011 | -1.168 | 3.035  | 3.258  | 3.195  | 2.653  | 4.203  | 3.867  | 4.463  | 4.280  |      |
| H2-Q7         | 0.027 | -1.168 | -0.393 | -0.453 | -0.110 | -0.614 | 0.775  | 1.284  | 0.825  | 0.218  | Up   |
| Fam171b       | 0.036 | -1.169 | -1.741 | -1.420 | -2.347 | -1.457 | -0.573 | -1.020 | -0.362 | -0.336 |      |
| Ank           | 0.050 | -1.169 | 2.198  | 2.443  | 1.578  | 2.572  | 3.367  | 2.828  | 3.489  | 3.784  |      |
| Alkbh6        | 0.046 | -1.170 | 1.080  | 1.517  | 0.351  | 1.373  | 2.250  | 1.885  | 2.450  | 2.415  |      |
| Gfpt1         | 0.018 | -1.170 | 4.660  | 4.812  | 4.268  | 4.898  | 5.830  | 5.378  | 6.024  | 6.087  |      |
| Gm11821       | 0.035 | -1.171 | -1.916 | -1.789 | -2.330 | -1.631 | -0.745 | -0.872 | -0.162 | -1.200 |      |
| Zbtb25        | 0.012 | -1.173 | -1.714 | -1.943 | -1.603 | -1.596 | -0.541 | -0.952 | -0.113 | -0.558 |      |
| Ift81         | 0.022 | -1.176 | 3.573  | 3.952  | 2.988  | 3.778  | 4.749  | 4.495  | 4.924  | 4.828  |      |
| Slc22a17      | 0.041 | -1.177 | -0.496 | 0.047  | -1.040 | -0.494 | 0.681  | 0.239  | 0.732  | 1.072  |      |
| Cyb5b         | 0.006 | -1.179 | 3.254  | 3.229  | 3.237  | 3.295  | 4.432  | 4.014  | 4.530  | 4.753  |      |
| Gm6611        | 0.015 | -1.180 | -0.804 | -0.401 | -1.325 | -0.686 | 0.376  | 0.214  | 0.361  | 0.552  |      |
| Gm12231       | 0.001 | -1.183 | -1.132 | -0.934 | -1.241 | -1.221 | 0.051  | 0.120  | -0.133 | 0.165  |      |
| 9530051G07Rik | 0.050 | -1.183 | -0.838 | -0.732 | -0.885 | -0.897 | 0.345  | -0.497 | 0.797  | 0.735  |      |
| Pdia6         | 0.021 | -1.183 | 4.606  | 4.725  | 4.386  | 4.705  | 5.789  | 5.217  | 5.909  | 6.241  |      |
| 5330434G04Rik | 0.009 | -1.183 | 0.426  | 0.617  | 0.031  | 0.629  | 1.609  | 1.734  | 1.777  | 1.317  | Down |
| Mns1          | 0.008 | -1.184 | 1.793  | 1.725  | 2.129  | 1.525  | 2.977  | 2.659  | 3.161  | 3.112  |      |
| Jagn1         | 0.013 | -1.192 | 2.975  | 3.513  | 2.659  | 2.754  | 4.168  | 4.027  | 4.238  | 4.239  |      |
| Unc5c         | 0.025 | -1.194 | 0.106  | -0.071 | -0.195 | 0.585  | 1.300  | 0.915  | 1.750  | 1.235  |      |
| Zfp273        | 0.034 | -1.195 | -1.093 | -0.765 | -1.480 | -1.034 | 0.102  | -0.510 | 0.283  | 0.532  |      |
| Commd6        | 0.038 | -1.195 | 1.792  | 1.968  | 1.813  | 1.594  | 2.986  | 2.232  | 3.374  | 3.354  |      |
| Adam22        | 0.004 | -1.196 | 1.237  | 1.070  | 1.285  | 1.357  | 2.434  | 2.138  | 2.769  | 2.394  |      |
| C030006K11Rik | 0.016 | -1.197 | -1.559 | -1.320 | -1.931 | -1.426 | -0.362 | -0.799 | -0.021 | -0.266 |      |
| Scg5          | 0.032 | -1.202 | 3.817  | 4.137  | 3.490  | 3.822  | 5.018  | 4.373  | 5.377  | 5.305  |      |
| Uba5          | 0.007 | -1.203 | 2.745  | 2.949  | 2.499  | 2.785  | 3.947  | 3.559  | 4.073  | 4.210  |      |
| Pvrl1         | 0.014 | -1.203 | 0.070  | 0.464  | -0.058 | -0.197 | 1.273  | 0.900  | 1.302  | 1.616  |      |
| Casc4         | 0.024 | -1.204 | 4.094  | 4.536  | 3.587  | 4.159  | 5.298  | 5.061  | 5.136  | 5.697  |      |
| Slc35f1       | 0.045 | -1.204 | -1.474 | -1.446 | -1.740 | -1.235 | -0.270 | -0.234 | 0.388  | -0.963 | Down |
| Creb3l2       | 0.025 | -1.204 | 0.772  | 1.051  | 0.614  | 0.650  | 1.976  | 1.348  | 2.243  | 2.336  |      |
| Mia3          | 0.020 | -1.208 | 3.222  | 3.313  | 2.982  | 3.371  | 4.430  | 3.836  | 4.757  | 4.697  |      |
| Arfgap3       | 0.014 | -1.209 | 0.996  | 1.083  | 0.638  | 1.267  | 2.205  | 1.859  | 2.140  | 2.616  |      |
| Aptx          | 0.003 | -1.212 | -0.002 | 0.351  | -0.292 | -0.067 | 1.209  | 1.176  | 1.221  | 1.231  |      |
| Naga          | 0.029 | -1.212 | 0.560  | 1.032  | 0.018  | 0.629  | 1.772  | 1.351  | 1.924  | 2.040  |      |
| Tulp3         | 0.031 | -1.212 | 0.750  | 1.257  | 0.045  | 0.949  | 1.963  | 1.941  | 1.834  | 2.112  |      |
| Cnst          | 0.047 | -1.215 | 1.579  | 2.081  | 0.849  | 1.807  | 2.794  | 2.706  | 2.486  | 3.191  |      |
| Zfp185        | 0.015 | -1.215 | 0.093  | 0.352  | -0.083 | 0.008  | 1.308  | 0.791  | 1.451  | 1.682  | Up   |
| Cxx1c         | 0.033 | -1.220 | -0.641 | -0.231 | -1.195 | -0.497 | 0.579  | 0.729  | 0.914  | 0.093  |      |
| Ap2a1         | 0.034 | -1.221 | -0.573 | -0.970 | -0.038 | -0.710 | 0.649  | 0.606  | 1.131  | 0.208  |      |
| Rbm20         | 0.037 | -1.222 | -2.489 | -2.658 | -3.001 | -1.809 | -1.268 | -1.294 | -1.569 | -0.941 |      |
| Meg3          | 0.031 | -1.222 | 6.385  | 6.729  | 5.723  | 6.702  | 7.607  | 7.276  | 7.674  | 7.871  |      |
| Cyfp2         | 0.037 | -1.223 | 1.928  | 2.453  | 1.297  | 2.034  | 3.151  | 2.744  | 3.420  | 3.289  |      |
| Rian          | 0.026 | -1.229 | 7.842  | 8.158  | 7.349  | 8.020  | 9.071  | 8.587  | 9.200  | 9.425  |      |
| 2610301B20Rik | 0.013 | -1.232 | 1.876  | 1.776  | 2.005  | 1.846  | 3.108  | 3.262  | 2.569  | 3.494  |      |

|               |       |        |        |        |        |        |        |        |        |        |      |
|---------------|-------|--------|--------|--------|--------|--------|--------|--------|--------|--------|------|
| Gm14703       | 0.038 | -1.234 | 1.313  | 1.580  | 0.627  | 1.733  | 2.547  | 2.207  | 2.919  | 2.515  |      |
| Pex5l         | 0.017 | -1.234 | 2.384  | 2.810  | 1.861  | 2.480  | 3.617  | 3.342  | 3.854  | 3.657  | Up   |
| Gm21967       | 0.010 | -1.240 | -0.708 | -0.338 | -0.615 | -1.172 | 0.532  | 0.370  | 0.765  | 0.461  |      |
| Gm15716       | 0.009 | -1.241 | 2.197  | 1.970  | 2.606  | 2.015  | 3.438  | 3.548  | 3.644  | 3.121  |      |
| Gm5           | 0.001 | -1.241 | 1.111  | 1.199  | 1.050  | 1.082  | 2.352  | 2.488  | 2.065  | 2.503  |      |
| Hist2h2bb     | 0.027 | -1.242 | 0.825  | 1.124  | 0.904  | 0.446  | 2.067  | 1.531  | 2.576  | 2.093  |      |
| Gm12404       | 0.042 | -1.244 | -0.272 | -0.409 | -0.589 | 0.183  | 0.972  | 1.417  | 0.277  | 1.222  | Up   |
| Igsf5         | 0.034 | -1.244 | 1.136  | 1.530  | 0.506  | 1.371  | 2.380  | 1.994  | 2.787  | 2.360  |      |
| Gm9964        | 0.008 | -1.245 | 0.093  | -0.116 | -0.160 | 0.556  | 1.338  | 1.401  | 1.123  | 1.491  |      |
| Tns3          | 0.006 | -1.246 | 1.363  | 1.413  | 1.372  | 1.303  | 2.609  | 2.201  | 2.636  | 2.988  |      |
| Cmas          | 0.012 | -1.247 | 3.540  | 3.686  | 3.396  | 3.537  | 4.787  | 4.249  | 5.092  | 5.021  |      |
| Tmod1         | 0.034 | -1.248 | -1.163 | -1.539 | -1.099 | -0.851 | 0.085  | -0.063 | -0.418 | 0.735  |      |
| Anp32-ps      | 0.030 | -1.249 | 0.312  | 0.048  | 0.244  | 0.643  | 1.560  | 1.851  | 0.892  | 1.938  |      |
| Pi4k2a        | 0.049 | -1.250 | -1.316 | -0.670 | -2.050 | -1.229 | -0.066 | -0.446 | 0.031  | 0.218  |      |
| Dnm3os        | 0.035 | -1.251 | -2.622 | -2.335 | -2.500 | -3.033 | -1.372 | -1.452 | -0.749 | -1.914 |      |
| C630020P19Rik | 0.007 | -1.257 | 0.602  | 0.254  | 0.498  | 1.054  | 1.859  | 1.763  | 1.835  | 1.979  |      |
| Nucb1         | 0.004 | -1.259 | 1.042  | 0.747  | 1.178  | 1.200  | 2.301  | 2.261  | 2.053  | 2.588  |      |
| Ppm1e         | 0.007 | -1.259 | 0.664  | 0.744  | 0.669  | 0.580  | 1.924  | 1.561  | 2.382  | 1.830  |      |
| Uqcc1         | 0.025 | -1.263 | 1.173  | 1.763  | 0.561  | 1.196  | 2.437  | 2.546  | 2.544  | 2.220  |      |
| Por           | 0.034 | -1.265 | 2.839  | 3.318  | 2.281  | 2.918  | 4.104  | 3.607  | 4.207  | 4.497  |      |
| ExpH5         | 0.022 | -1.267 | 0.945  | 1.288  | 0.365  | 1.183  | 2.212  | 1.826  | 2.446  | 2.365  |      |
| Pdia3         | 0.010 | -1.267 | 6.857  | 6.867  | 6.603  | 7.101  | 8.124  | 7.661  | 8.309  | 8.402  |      |
| Hdac4         | 0.043 | -1.269 | -1.042 | -0.428 | -0.969 | -1.730 | 0.227  | 0.595  | -0.153 | 0.237  |      |
| Gm15613       | 0.048 | -1.271 | 1.277  | 1.998  | 0.457  | 1.377  | 2.548  | 2.581  | 2.618  | 2.446  |      |
| Kcnmb2        | 0.036 | -1.272 | 1.309  | 1.221  | 0.828  | 1.878  | 2.581  | 2.058  | 2.721  | 2.965  | Up   |
| Dnajb11       | 0.009 | -1.275 | 6.591  | 6.556  | 6.619  | 6.597  | 7.866  | 7.333  | 8.148  | 8.116  |      |
| Suox          | 0.040 | -1.275 | 1.895  | 2.319  | 1.185  | 2.181  | 3.171  | 2.712  | 3.334  | 3.465  |      |
| Adh1          | 0.023 | -1.276 | -0.623 | -0.099 | -1.056 | -0.716 | 0.652  | 1.097  | 0.432  | 0.428  | Up   |
| Bnip1         | 0.030 | -1.276 | 0.126  | 0.780  | -0.325 | -0.077 | 1.402  | 1.067  | 1.407  | 1.730  |      |
| Ubxn10        | 0.034 | -1.277 | -0.446 | -0.236 | -0.490 | -0.614 | 0.831  | 0.073  | 1.365  | 1.055  |      |
| Cox18         | 0.014 | -1.280 | 0.430  | 0.658  | 0.074  | 0.557  | 1.709  | 1.259  | 1.765  | 2.103  |      |
| Slc38a4       | 0.021 | -1.280 | 2.665  | 2.531  | 3.114  | 2.350  | 3.945  | 3.477  | 3.982  | 4.376  |      |
| Tada2b        | 0.008 | -1.283 | 0.166  | 0.606  | -0.287 | 0.179  | 1.448  | 1.373  | 1.428  | 1.544  | Up   |
| Gm4353        | 0.041 | -1.283 | -1.832 | -1.425 | -2.562 | -1.510 | -0.549 | -0.829 | -0.090 | -0.727 |      |
| Zeb1          | 0.034 | -1.284 | 1.992  | 1.826  | 1.481  | 2.668  | 3.276  | 2.985  | 3.659  | 3.183  |      |
| Frmd5         | 0.003 | -1.288 | 0.274  | 0.483  | -0.049 | 0.387  | 1.561  | 1.329  | 1.597  | 1.758  |      |
| Glb1l2        | 0.018 | -1.289 | 2.288  | 2.601  | 1.737  | 2.526  | 3.577  | 3.213  | 3.794  | 3.722  |      |
| Ccdc176       | 0.008 | -1.292 | 1.122  | 1.584  | 0.728  | 1.054  | 2.414  | 2.390  | 2.578  | 2.276  |      |
| Dnajc3        | 0.001 | -1.294 | 3.746  | 3.771  | 3.779  | 3.689  | 5.040  | 4.730  | 5.228  | 5.161  |      |
| Uso1          | 0.010 | -1.294 | 3.451  | 3.688  | 3.058  | 3.606  | 4.745  | 4.358  | 4.857  | 5.020  |      |
| Jakmip1       | 0.009 | -1.295 | -1.029 | -1.203 | -0.598 | -1.285 | 0.267  | 0.380  | -0.050 | 0.470  |      |
| Mum1          | 0.035 | -1.297 | 0.898  | 0.511  | 1.442  | 0.742  | 2.195  | 1.736  | 2.073  | 2.776  |      |
| Ksr2          | 0.021 | -1.297 | 0.049  | 0.166  | -0.467 | 0.448  | 1.346  | 0.895  | 1.573  | 1.570  |      |
| Tpgs2         | 0.003 | -1.299 | -0.577 | -0.235 | -0.709 | -0.788 | 0.721  | 0.905  | 0.542  | 0.717  |      |
| D2hgdh        | 0.004 | -1.300 | -1.105 | -1.018 | -0.961 | -1.334 | 0.195  | 0.473  | 0.273  | -0.160 |      |
| Rtl1          | 0.030 | -1.301 | -1.032 | -0.497 | -1.500 | -1.098 | 0.269  | -0.151 | 0.196  | 0.761  |      |
| Ostc          | 0.002 | -1.305 | 3.660  | 3.751  | 3.521  | 3.707  | 4.964  | 4.626  | 5.070  | 5.197  |      |
| Tssc4         | 0.022 | -1.306 | 0.978  | 1.255  | 0.768  | 0.911  | 2.284  | 1.669  | 2.404  | 2.778  |      |
| Pclo          | 0.011 | -1.306 | -0.270 | -0.539 | -0.540 | 0.269  | 1.037  | 1.271  | 0.963  | 0.876  |      |
| Grk5          | 0.049 | -1.309 | -0.047 | 0.429  | -0.801 | 0.232  | 1.262  | 0.907  | 1.796  | 1.083  |      |
| Hsp90b1       | 0.003 | -1.310 | 9.981  | 9.772  | 10.050 | 10.121 | 11.290 | 10.970 | 11.401 | 11.500 |      |
| Gm21839       | 0.009 | -1.311 | 0.129  | 0.514  | -0.120 | -0.007 | 1.440  | 1.316  | 1.822  | 1.181  |      |
| Cerk          | 0.014 | -1.311 | -2.463 | -2.383 | -2.687 | -2.319 | -1.152 | -1.530 | -1.351 | -0.575 | Down |
| Larp1b        | 0.009 | -1.318 | -0.873 | -1.149 | -0.698 | -0.773 | 0.445  | 0.266  | 0.147  | 0.922  |      |
| Plekhh1       | 0.021 | -1.319 | -1.694 | -1.637 | -1.899 | -1.545 | -0.375 | -1.014 | -0.249 | 0.139  | Up   |
| Rhox8         | 0.017 | -1.321 | -2.691 | -3.069 | -2.288 | -2.715 | -1.369 | -0.997 | -1.848 | -1.264 |      |

|                |       |        |        |        |        |        |        |        |        |        |      |
|----------------|-------|--------|--------|--------|--------|--------|--------|--------|--------|--------|------|
| C330018A13Rik  | 0.003 | -1.321 | -2.109 | -1.970 | -2.452 | -1.906 | -0.788 | -0.559 | -0.940 | -0.864 |      |
| Zfp54          | 0.035 | -1.327 | 0.573  | 0.148  | 0.157  | 1.415  | 1.900  | 1.899  | 1.814  | 1.987  |      |
| Gm15063        | 0.047 | -1.328 | -0.159 | -0.439 | -0.746 | 0.707  | 1.168  | 0.881  | 1.255  | 1.370  |      |
| Gcat           | 0.009 | -1.329 | -2.240 | -2.347 | -1.951 | -2.422 | -0.911 | -1.370 | -0.583 | -0.781 |      |
| BC029214       | 0.029 | -1.329 | -1.435 | -1.079 | -1.083 | -2.141 | -0.105 | 0.006  | 0.145  | -0.467 |      |
| Gm15138        | 0.009 | -1.331 | -0.404 | -0.138 | -0.679 | -0.395 | 0.927  | 1.342  | 0.909  | 0.529  |      |
| Zfp523         | 0.015 | -1.332 | -2.398 | -2.243 | -1.932 | -3.019 | -1.066 | -0.985 | -1.084 | -1.128 |      |
| Tdp1           | 0.004 | -1.333 | 0.028  | 0.101  | -0.283 | 0.267  | 1.362  | 1.653  | 1.223  | 1.209  |      |
| Tubb2a         | 0.022 | -1.335 | 3.750  | 3.980  | 3.335  | 3.937  | 5.085  | 4.489  | 5.340  | 5.427  |      |
| Npnt           | 0.005 | -1.341 | 1.534  | 1.495  | 1.308  | 1.800  | 2.875  | 2.506  | 3.031  | 3.088  |      |
| Tshz1          | 0.028 | -1.344 | 1.699  | 2.066  | 1.120  | 1.911  | 3.043  | 2.500  | 3.290  | 3.338  |      |
| Slc7a14        | 0.047 | -1.346 | 2.764  | 2.970  | 1.933  | 3.390  | 4.110  | 3.716  | 4.293  | 4.322  |      |
| Lonrf2         | 0.006 | -1.346 | -0.157 | 0.259  | -0.216 | -0.516 | 1.188  | 0.988  | 1.294  | 1.283  |      |
| Anapc7         | 0.031 | -1.346 | 0.546  | 0.661  | 0.081  | 0.896  | 1.893  | 1.226  | 2.287  | 2.165  |      |
| Ube2s          | 0.050 | -1.349 | 0.384  | 0.912  | 0.036  | 0.203  | 1.733  | 0.961  | 2.324  | 1.914  |      |
| Zfp568         | 0.014 | -1.350 | 2.608  | 2.818  | 2.154  | 2.853  | 3.959  | 3.504  | 4.130  | 4.242  | Up   |
| Syne4          | 0.024 | -1.354 | 0.110  | 0.055  | 0.545  | -0.269 | 1.465  | 1.300  | 1.043  | 2.051  |      |
| Ppil6          | 0.042 | -1.355 | 1.986  | 2.043  | 1.453  | 2.461  | 3.341  | 3.211  | 2.800  | 4.012  |      |
| Dnajb9         | 0.005 | -1.355 | 4.079  | 4.173  | 3.935  | 4.130  | 5.434  | 4.977  | 5.664  | 5.662  |      |
| Pde9a          | 0.015 | -1.358 | -0.715 | -0.151 | -0.803 | -1.191 | 0.643  | 0.737  | 0.808  | 0.385  |      |
| Uhrf1bp1       | 0.033 | -1.358 | -0.996 | -0.646 | -1.514 | -0.829 | 0.362  | 0.206  | -0.123 | 1.004  | Up   |
| Mpp3           | 0.008 | -1.360 | -0.298 | 0.060  | -0.249 | -0.704 | 1.062  | 0.793  | 1.010  | 1.384  | Down |
| Aldh5a1        | 0.001 | -1.360 | 2.391  | 2.394  | 2.260  | 2.519  | 3.751  | 3.485  | 3.786  | 3.983  | Down |
| Akr1c12        | 0.024 | -1.360 | 3.668  | 3.593  | 3.165  | 4.247  | 5.028  | 4.597  | 5.171  | 5.317  |      |
| Thsd4          | 0.032 | -1.360 | 0.414  | 0.743  | -0.226 | 0.726  | 1.775  | 1.453  | 2.315  | 1.556  |      |
| Cntn4          | 0.042 | -1.362 | -0.587 | -0.547 | -1.180 | -0.034 | 0.775  | 0.159  | 0.907  | 1.258  |      |
| Arhgap26       | 0.010 | -1.362 | 2.398  | 2.917  | 1.911  | 2.365  | 3.759  | 3.669  | 3.836  | 3.773  |      |
| Vldlr          | 0.021 | -1.365 | 0.746  | 1.273  | 0.097  | 0.869  | 2.112  | 1.859  | 2.247  | 2.229  |      |
| Alpk2          | 0.035 | -1.366 | -1.882 | -1.650 | -2.277 | -1.718 | -0.516 | -1.283 | -0.256 | -0.010 |      |
| Slc7a2         | 0.042 | -1.368 | 4.142  | 4.333  | 3.322  | 4.770  | 5.509  | 5.188  | 5.564  | 5.777  | Up   |
| Crb1           | 0.026 | -1.370 | -2.149 | -1.450 | -2.777 | -2.221 | -0.779 | -0.619 | -0.937 | -0.781 |      |
| AI480526       | 0.005 | -1.372 | 2.221  | 2.611  | 1.788  | 2.263  | 3.593  | 3.505  | 3.629  | 3.643  |      |
| Gm10717        | 0.047 | -1.373 | 5.132  | 4.486  | 5.318  | 5.592  | 6.505  | 7.208  | 6.154  | 6.153  |      |
| Cecr5          | 0.047 | -1.374 | -0.021 | 0.325  | -0.844 | 0.455  | 1.352  | 1.599  | 0.850  | 1.607  |      |
| Mblac2         | 0.016 | -1.374 | 0.058  | 0.147  | -0.348 | 0.375  | 1.432  | 0.995  | 1.391  | 1.911  |      |
| Fmo1           | 0.003 | -1.375 | 2.285  | 2.368  | 2.551  | 1.937  | 3.660  | 3.503  | 3.656  | 3.821  |      |
| Mettl18        | 0.021 | -1.379 | 0.260  | 0.453  | 0.557  | -0.230 | 1.639  | 1.144  | 1.653  | 2.118  |      |
| Akap6          | 0.002 | -1.380 | -1.819 | -1.759 | -1.592 | -2.105 | -0.438 | -0.322 | -0.653 | -0.340 | Up   |
| Mafg           | 0.034 | -1.381 | 1.660  | 2.103  | 0.917  | 1.959  | 3.041  | 2.626  | 3.081  | 3.416  |      |
| Dzank1         | 0.017 | -1.382 | 0.302  | 0.398  | 0.273  | 0.234  | 1.684  | 2.004  | 0.985  | 2.063  |      |
| Gm15813        | 0.043 | -1.383 | -2.790 | -3.305 | -2.939 | -2.125 | -1.407 | -1.391 | -1.972 | -0.858 |      |
| Fmn2           | 0.009 | -1.383 | 0.306  | 0.369  | -0.229 | 0.778  | 1.689  | 1.708  | 1.703  | 1.656  |      |
| RP23-103l12.13 | 0.012 | -1.387 | 0.015  | 0.522  | -0.577 | 0.101  | 1.403  | 1.384  | 1.443  | 1.381  |      |
| Doc2b          | 0.022 | -1.391 | -0.801 | -0.294 | -1.149 | -0.960 | 0.590  | 0.115  | 0.571  | 1.085  |      |
| Thyn1          | 0.009 | -1.392 | 1.378  | 1.201  | 1.824  | 1.108  | 2.770  | 2.414  | 2.820  | 3.075  |      |
| Fzd7           | 0.025 | -1.396 | 1.129  | 1.035  | 1.842  | 0.509  | 2.525  | 2.381  | 2.696  | 2.496  | Up   |
| Celf4          | 0.032 | -1.396 | 0.476  | 0.936  | -0.271 | 0.763  | 1.872  | 1.510  | 2.251  | 1.854  |      |
| Gm17103        | 0.009 | -1.396 | 1.849  | 1.505  | 1.809  | 2.232  | 3.245  | 2.875  | 3.256  | 3.603  |      |
| Dlc1           | 0.010 | -1.397 | 0.309  | 0.337  | -0.161 | 0.752  | 1.706  | 1.416  | 1.923  | 1.778  | Up   |
| Limk1          | 0.036 | -1.397 | -1.418 | -2.222 | -0.930 | -1.103 | -0.021 | 0.320  | -0.355 | -0.029 |      |
| Entpd3         | 0.048 | -1.398 | 1.756  | 2.314  | 0.873  | 2.081  | 3.154  | 2.749  | 3.213  | 3.500  |      |
| Surf4          | 0.020 | -1.398 | 2.538  | 2.924  | 2.170  | 2.520  | 3.936  | 3.355  | 4.083  | 4.371  |      |
| Ush1c          | 0.017 | -1.400 | 0.867  | 1.037  | 0.309  | 1.255  | 2.267  | 1.946  | 2.203  | 2.651  |      |
| Fkbp14         | 0.014 | -1.400 | 1.511  | 1.956  | 0.905  | 1.672  | 2.912  | 2.684  | 2.947  | 3.105  |      |
| Usp51          | 0.037 | -1.409 | -0.038 | -0.272 | -0.391 | 0.550  | 1.372  | 0.679  | 1.655  | 1.783  |      |
| Scamp4         | 0.026 | -1.411 | -1.355 | -0.809 | -1.338 | -1.919 | 0.056  | -0.175 | -0.220 | 0.562  |      |

|               |       |        |        |        |        |        |        |        |        |        |      |
|---------------|-------|--------|--------|--------|--------|--------|--------|--------|--------|--------|------|
| Gpr119        | 0.018 | -1.411 | 0.098  | 0.045  | -0.390 | 0.639  | 1.509  | 1.193  | 1.898  | 1.437  | Up   |
| Gng4          | 0.008 | -1.411 | 2.606  | 2.497  | 2.633  | 2.688  | 4.017  | 3.448  | 4.326  | 4.278  | Down |
| Sgsm3         | 0.036 | -1.416 | -1.157 | -0.498 | -1.911 | -1.063 | 0.259  | 0.254  | -0.083 | 0.605  |      |
| Gm9803        | 0.013 | -1.417 | -1.288 | -1.344 | -1.241 | -1.280 | 0.129  | -0.530 | 0.359  | 0.557  |      |
| 2900076A07Rik | 0.007 | -1.420 | 1.859  | 2.380  | 1.577  | 1.621  | 3.280  | 3.224  | 3.463  | 3.152  | Up   |
| Gm9001        | 0.003 | -1.420 | -0.904 | -1.042 | -0.524 | -1.147 | 0.516  | 0.500  | 0.684  | 0.365  |      |
| Rps6ka2       | 0.048 | -1.422 | -0.421 | -0.021 | -1.290 | 0.049  | 1.001  | 0.504  | 1.151  | 1.348  |      |
| Sult1d1       | 0.005 | -1.422 | 0.546  | 0.478  | 0.197  | 0.963  | 1.968  | 1.724  | 2.022  | 2.159  | Up   |
| Rab27a        | 0.022 | -1.424 | 2.932  | 3.326  | 2.457  | 3.013  | 4.355  | 3.780  | 4.768  | 4.519  |      |
| Pex11g        | 0.020 | -1.425 | -0.173 | -0.032 | -0.378 | -0.108 | 1.252  | 0.543  | 1.765  | 1.448  |      |
| Tbc1d22b      | 0.006 | -1.426 | 0.804  | 0.970  | 0.470  | 0.973  | 2.230  | 1.830  | 2.515  | 2.345  |      |
| Gpr98         | 0.002 | -1.429 | 1.912  | 1.805  | 1.710  | 2.221  | 3.341  | 3.085  | 3.523  | 3.415  |      |
| Acad12        | 0.019 | -1.432 | -2.393 | -2.793 | -2.503 | -1.883 | -0.961 | -1.474 | -0.779 | -0.631 |      |
| Tmem65        | 0.007 | -1.432 | 2.925  | 3.085  | 2.509  | 3.182  | 4.358  | 3.992  | 4.519  | 4.561  |      |
| Rab39b        | 0.006 | -1.432 | 1.467  | 1.360  | 1.202  | 1.839  | 2.899  | 2.532  | 3.131  | 3.034  |      |
| Sesn3         | 0.018 | -1.434 | 2.920  | 3.260  | 2.295  | 3.206  | 4.355  | 3.956  | 4.547  | 4.561  |      |
| Gm26906       | 0.048 | -1.437 | 3.122  | 3.770  | 2.277  | 3.318  | 4.559  | 4.217  | 4.409  | 5.050  |      |
| Nucb2         | 0.004 | -1.438 | 4.735  | 4.654  | 4.653  | 4.898  | 6.173  | 5.744  | 6.484  | 6.290  |      |
| Gm15607       | 0.017 | -1.438 | 0.890  | 0.917  | 0.528  | 1.226  | 2.329  | 1.715  | 2.614  | 2.658  |      |
| Fam166a       | 0.021 | -1.443 | 0.726  | 0.834  | 0.030  | 1.313  | 2.169  | 1.984  | 2.152  | 2.370  |      |
| Gm9747        | 0.018 | -1.447 | -0.173 | 0.145  | -0.782 | 0.118  | 1.274  | 0.849  | 1.474  | 1.499  |      |
| Sh3pxd2a      | 0.035 | -1.447 | 0.020  | 0.491  | -0.483 | 0.051  | 1.466  | 0.734  | 1.795  | 1.870  |      |
| Nlgn2         | 0.020 | -1.448 | -0.534 | -0.347 | -1.245 | -0.010 | 0.914  | 0.701  | 1.002  | 1.039  |      |
| Napepld       | 0.006 | -1.449 | -0.329 | 0.044  | -0.760 | -0.270 | 1.120  | 0.940  | 1.035  | 1.386  |      |
| Manf          | 0.011 | -1.451 | 5.532  | 5.722  | 5.229  | 5.645  | 6.983  | 6.408  | 7.266  | 7.277  |      |
| Tmod2         | 0.040 | -1.452 | 0.079  | 0.492  | -0.837 | 0.582  | 1.531  | 1.235  | 1.598  | 1.759  |      |
| Abat          | 0.004 | -1.452 | 0.911  | 0.912  | 0.712  | 1.110  | 2.363  | 1.951  | 2.433  | 2.705  |      |
| Gm15624       | 0.000 | -1.452 | -0.626 | -0.392 | -0.611 | -0.876 | 0.826  | 0.808  | 0.858  | 0.811  |      |
| Pdia4         | 0.003 | -1.455 | 4.399  | 4.512  | 4.178  | 4.506  | 5.854  | 5.454  | 6.036  | 6.071  |      |
| Plcx2         | 0.014 | -1.456 | 0.285  | 0.021  | 0.071  | 0.764  | 1.741  | 1.243  | 2.093  | 1.887  |      |
| Slc37a4       | 0.002 | -1.457 | 0.187  | 0.438  | 0.078  | 0.046  | 1.645  | 1.904  | 1.697  | 1.333  |      |
| Mdm1          | 0.035 | -1.459 | 2.089  | 2.485  | 1.236  | 2.546  | 3.548  | 3.217  | 3.844  | 3.583  | Up   |
| Cdk5r2        | 0.012 | -1.463 | -0.978 | -0.520 | -1.534 | -0.879 | 0.485  | 0.179  | 0.719  | 0.556  |      |
| Scn9a         | 0.006 | -1.464 | 0.729  | 0.709  | 0.282  | 1.195  | 2.193  | 2.099  | 2.372  | 2.107  |      |
| Pdia5         | 0.004 | -1.467 | 0.423  | 0.701  | 0.232  | 0.336  | 1.890  | 1.494  | 2.033  | 2.142  |      |
| Klhdc9        | 0.001 | -1.472 | -2.077 | -2.052 | -2.145 | -2.032 | -0.605 | -0.878 | -0.575 | -0.361 |      |
| Crot          | 0.002 | -1.478 | 2.927  | 3.110  | 2.812  | 2.858  | 4.404  | 4.032  | 4.518  | 4.663  |      |
| 6330403K07Rik | 0.007 | -1.482 | -0.368 | -0.155 | -0.075 | -0.874 | 1.114  | 0.844  | 1.225  | 1.272  |      |
| Pfkfb2        | 0.007 | -1.483 | 2.857  | 3.046  | 2.483  | 3.041  | 4.340  | 3.968  | 4.331  | 4.720  |      |
| Rora          | 0.032 | -1.490 | 1.928  | 2.400  | 1.041  | 2.343  | 3.418  | 3.184  | 3.598  | 3.474  |      |
| Aacs          | 0.037 | -1.492 | -0.745 | -0.193 | -1.582 | -0.460 | 0.747  | 0.352  | 0.732  | 1.157  |      |
| Cox7b         | 0.006 | -1.494 | 5.599  | 5.676  | 5.374  | 5.745  | 7.093  | 6.579  | 7.316  | 7.384  | Down |
| A830039N20Rik | 0.042 | -1.495 | 0.015  | -0.272 | -0.099 | 0.417  | 1.511  | 0.597  | 1.830  | 2.104  |      |
| Gm12360       | 0.046 | -1.496 | 1.813  | 2.134  | 0.881  | 2.424  | 3.309  | 2.877  | 3.451  | 3.600  |      |
| Alg12         | 0.012 | -1.496 | 0.057  | 0.595  | -0.321 | -0.105 | 1.553  | 1.717  | 1.141  | 1.800  |      |
| Prrc1         | 0.011 | -1.497 | 1.947  | 2.133  | 1.625  | 2.083  | 3.444  | 2.853  | 3.707  | 3.771  |      |
| Desi1         | 0.020 | -1.500 | 0.995  | 1.544  | 0.283  | 1.158  | 2.495  | 2.224  | 2.721  | 2.540  |      |
| Creld1        | 0.008 | -1.502 | 0.378  | 0.355  | 0.157  | 0.624  | 1.880  | 1.348  | 2.016  | 2.277  |      |
| Swsap1        | 0.049 | -1.505 | -1.849 | -0.838 | -2.204 | -2.506 | -0.344 | -0.108 | -0.284 | -0.642 |      |
| Uap1          | 0.016 | -1.506 | 1.896  | 2.420  | 1.357  | 1.912  | 3.402  | 3.032  | 3.779  | 3.395  |      |
| Man2a2        | 0.006 | -1.508 | 0.017  | 0.538  | -0.257 | -0.229 | 1.525  | 1.329  | 1.680  | 1.567  |      |
| Gpr116        | 0.013 | -1.511 | -2.473 | -1.770 | -2.840 | -2.808 | -0.961 | -1.069 | -0.934 | -0.882 |      |
| Gm13544       | 0.039 | -1.514 | -0.188 | -0.159 | -1.052 | 0.646  | 1.325  | 1.188  | 1.500  | 1.288  |      |
| Asb13         | 0.002 | -1.520 | 1.036  | 0.872  | 1.081  | 1.156  | 2.556  | 2.204  | 2.676  | 2.789  |      |
| Gm14540       | 0.023 | -1.522 | 1.017  | 1.539  | 0.546  | 0.965  | 2.538  | 1.921  | 2.891  | 2.802  |      |
| Rnf123        | 0.012 | -1.526 | 2.797  | 3.151  | 2.547  | 2.694  | 4.323  | 3.739  | 4.521  | 4.709  |      |



|               |       |        |        |        |        |        |        |        |        |        |      |
|---------------|-------|--------|--------|--------|--------|--------|--------|--------|--------|--------|------|
| Skap1         | 0.000 | -1.526 | -0.608 | -0.442 | -0.791 | -0.592 | 0.917  | 1.096  | 0.837  | 0.819  |      |
| Hyal1         | 0.007 | -1.527 | -2.189 | -1.792 | -2.436 | -2.340 | -0.662 | -0.223 | -0.971 | -0.793 | Up   |
| Iapp          | 0.008 | -1.528 | 7.441  | 7.385  | 7.026  | 7.912  | 8.969  | 8.609  | 9.099  | 9.199  |      |
| Padi2         | 0.004 | -1.529 | -1.309 | -1.419 | -1.069 | -1.440 | 0.220  | -0.163 | 0.587  | 0.236  |      |
| Ccdc62        | 0.029 | -1.531 | -0.673 | -0.287 | -1.576 | -0.156 | 0.858  | 0.878  | 0.946  | 0.750  |      |
| Mirg          | 0.003 | -1.535 | 2.364  | 2.670  | 1.945  | 2.479  | 3.900  | 3.725  | 3.945  | 4.029  |      |
| Fam19a1       | 0.028 | -1.536 | -1.065 | -0.980 | -1.822 | -0.394 | 0.471  | 0.663  | 0.089  | 0.660  |      |
| Pms2          | 0.034 | -1.538 | 0.446  | 0.472  | -0.217 | 1.083  | 1.984  | 1.771  | 2.593  | 1.590  |      |
| Hadh          | 0.004 | -1.539 | 2.047  | 2.246  | 1.617  | 2.279  | 3.586  | 3.289  | 3.739  | 3.731  |      |
| Sstr3         | 0.019 | -1.540 | -0.570 | -0.135 | -1.341 | -0.234 | 0.970  | 0.742  | 1.106  | 1.061  |      |
| Rusc1         | 0.013 | -1.541 | -2.230 | -2.524 | -2.258 | -1.908 | -0.689 | -1.020 | -0.061 | -0.986 |      |
| 4930419G24Rik | 0.045 | -1.542 | -0.715 | -0.314 | -1.472 | -0.359 | 0.827  | 0.509  | 0.394  | 1.579  |      |
| D10Bwg1379e   | 0.002 | -1.545 | 0.782  | 0.794  | 0.493  | 1.060  | 2.327  | 2.016  | 2.484  | 2.481  |      |
| Slc18a1       | 0.032 | -1.546 | -0.340 | -0.051 | -1.145 | 0.177  | 1.206  | 0.839  | 1.099  | 1.681  | Down |
| Ppapdc1b      | 0.002 | -1.546 | 2.361  | 2.407  | 2.555  | 2.122  | 3.908  | 3.575  | 3.978  | 4.170  |      |
| Acot11        | 0.005 | -1.547 | -1.827 | -1.405 | -2.300 | -1.776 | -0.280 | -0.153 | -0.265 | -0.421 |      |
| Scg3          | 0.033 | -1.548 | 5.545  | 5.766  | 4.713  | 6.155  | 7.092  | 6.651  | 7.273  | 7.354  |      |
| Gm13921       | 0.036 | -1.548 | -2.753 | -2.240 | -2.724 | -3.295 | -1.205 | -1.981 | -0.674 | -0.960 |      |
| Pcsk1         | 0.040 | -1.554 | 4.214  | 4.462  | 3.303  | 4.877  | 5.768  | 5.346  | 5.958  | 6.000  |      |
| Ypel4         | 0.049 | -1.557 | -0.486 | -0.270 | -1.253 | 0.065  | 1.071  | 0.381  | 1.097  | 1.735  |      |
| Duxbl3        | 0.033 | -1.563 | -1.224 | -0.668 | -1.992 | -1.010 | 0.339  | 0.204  | 0.888  | -0.073 |      |
| Kctd8         | 0.020 | -1.565 | 0.027  | 0.053  | -0.510 | 0.539  | 1.592  | 1.188  | 2.148  | 1.440  | Up   |
| Thsd7a        | 0.036 | -1.566 | -0.903 | -0.778 | -1.506 | -0.426 | 0.662  | -0.098 | 1.207  | 0.877  |      |
| D330022K07Rik | 0.030 | -1.566 | 0.603  | 1.345  | -0.196 | 0.659  | 2.168  | 1.850  | 2.344  | 2.312  |      |
| Creld2        | 0.005 | -1.566 | 3.636  | 3.874  | 3.216  | 3.819  | 5.203  | 4.827  | 5.300  | 5.481  |      |
| Frzb          | 0.027 | -1.568 | 1.144  | 1.395  | 0.555  | 1.483  | 2.712  | 2.045  | 3.244  | 2.846  |      |
| Neb           | 0.012 | -1.568 | -0.655 | -0.607 | -0.148 | -1.210 | 0.914  | 0.877  | 1.238  | 0.625  |      |
| Mafb          | 0.037 | -1.573 | 2.442  | 2.670  | 1.535  | 3.122  | 4.016  | 3.622  | 4.198  | 4.226  | Up   |
| Reep2         | 0.007 | -1.574 | -1.536 | -1.774 | -1.911 | -0.923 | 0.038  | -0.035 | 0.034  | 0.115  | Down |
| Gm9877        | 0.003 | -1.577 | -1.712 | -1.551 | -1.877 | -1.709 | -0.135 | -0.577 | 0.109  | 0.062  |      |
| 9530077C05Rik | 0.011 | -1.577 | -2.218 | -2.458 | -2.092 | -2.104 | -0.641 | -0.824 | -1.105 | 0.006  |      |
| Tha1          | 0.019 | -1.582 | -3.002 | -2.401 | -3.357 | -3.246 | -1.420 | -1.897 | -0.915 | -1.447 |      |
| 4930570N19Rik | 0.036 | -1.586 | -1.512 | -1.246 | -1.787 | -1.503 | 0.074  | 0.708  | 0.401  | -0.886 |      |
| Prkcb         | 0.010 | -1.587 | 1.901  | 2.240  | 1.573  | 1.890  | 3.488  | 2.937  | 3.640  | 3.888  | Down |
| Optn          | 0.016 | -1.591 | -0.320 | -0.205 | -0.898 | 0.143  | 1.271  | 0.786  | 1.651  | 1.377  |      |
| Ptpn          | 0.008 | -1.592 | -1.327 | -0.710 | -1.790 | -1.482 | 0.265  | 0.179  | 0.220  | 0.397  |      |
| Srrd          | 0.009 | -1.600 | -1.652 | -1.514 | -1.570 | -1.872 | -0.052 | 0.379  | 0.149  | -0.686 |      |
| Gm24497       | 0.013 | -1.601 | 0.475  | 0.452  | 1.040  | -0.069 | 2.075  | 2.415  | 2.098  | 1.713  |      |
| Gcdh          | 0.018 | -1.602 | 0.515  | 0.985  | 0.570  | -0.009 | 2.117  | 1.525  | 2.309  | 2.516  |      |
| Sspn          | 0.031 | -1.602 | -1.734 | -1.949 | -2.129 | -1.124 | -0.132 | -0.776 | -0.159 | 0.537  |      |
| Rimk1a        | 0.013 | -1.604 | -2.043 | -1.915 | -2.456 | -1.758 | -0.439 | -0.409 | 0.087  | -0.994 |      |
| Socs2         | 0.004 | -1.605 | -1.437 | -1.557 | -1.728 | -1.027 | 0.168  | 0.272  | 0.417  | -0.185 |      |
| Derl2         | 0.002 | -1.607 | 3.230  | 3.393  | 2.861  | 3.436  | 4.836  | 4.617  | 4.847  | 5.044  |      |
| Slc13a4       | 0.049 | -1.607 | -2.608 | -2.186 | -3.668 | -1.970 | -1.001 | -1.420 | -0.895 | -0.686 |      |
| Fkbp1b        | 0.026 | -1.612 | -0.127 | 0.259  | 0.255  | -0.894 | 1.485  | 1.172  | 2.004  | 1.278  |      |
| H2-T10        | 0.015 | -1.617 | -2.639 | -2.401 | -2.329 | -3.187 | -1.022 | -1.569 | -0.846 | -0.652 | Up   |
| Lgals12       | 0.013 | -1.621 | -0.359 | -0.737 | -0.020 | -0.322 | 1.262  | 0.633  | 1.693  | 1.460  |      |
| Scrn1         | 0.036 | -1.624 | 0.209  | 0.350  | -0.754 | 1.030  | 1.832  | 1.778  | 1.750  | 1.969  |      |
| Jph4          | 0.001 | -1.627 | -0.618 | -0.817 | -0.752 | -0.286 | 1.009  | 1.160  | 0.771  | 1.094  | Up   |
| RP23-184F1.2  | 0.000 | -1.628 | -1.124 | -1.207 | -1.119 | -1.045 | 0.504  | 0.604  | 0.244  | 0.664  |      |
| Zc3h6         | 0.011 | -1.632 | -0.412 | -0.111 | -0.955 | -0.169 | 1.220  | 0.927  | 1.700  | 1.034  |      |
| Gm27033       | 0.020 | -1.633 | 5.619  | 6.034  | 4.839  | 5.983  | 7.251  | 6.966  | 7.616  | 7.173  |      |
| Gm16726       | 0.023 | -1.637 | -1.190 | -0.433 | -1.417 | -1.719 | 0.447  | 0.624  | 0.743  | -0.026 |      |
| 2810442N19Rik | 0.026 | -1.638 | -2.938 | -2.920 | -2.796 | -3.098 | -1.300 | -0.526 | -2.129 | -1.246 |      |
| Sobp          | 0.008 | -1.644 | -0.258 | -0.170 | -0.831 | 0.226  | 1.385  | 1.146  | 1.377  | 1.633  |      |
| Olfr588-ps1   | 0.001 | -1.647 | -2.419 | -2.563 | -2.197 | -2.498 | -0.773 | -0.933 | -0.510 | -0.875 |      |

|               |       |        |        |        |        |        |        |        |        |        |      |
|---------------|-------|--------|--------|--------|--------|--------|--------|--------|--------|--------|------|
| Fam174b       | 0.009 | -1.661 | 1.501  | 1.797  | 0.901  | 1.806  | 3.162  | 2.793  | 3.420  | 3.273  |      |
| Rab3a         | 0.019 | -1.662 | 1.010  | 1.359  | 0.454  | 1.217  | 2.672  | 2.018  | 3.074  | 2.925  | Down |
| Ggcx          | 0.010 | -1.664 | 0.653  | 0.958  | 0.136  | 0.866  | 2.317  | 1.829  | 2.647  | 2.475  |      |
| Nefh          | 0.024 | -1.666 | -1.382 | -1.075 | -1.903 | -1.169 | 0.284  | -0.320 | 1.009  | 0.163  | Down |
| Mettl1        | 0.024 | -1.666 | -1.601 | -1.726 | -0.984 | -2.094 | 0.065  | -0.379 | 0.732  | -0.158 |      |
| Wipi1         | 0.015 | -1.669 | 1.231  | 1.734  | 0.568  | 1.391  | 2.900  | 2.479  | 3.022  | 3.199  |      |
| Wfikn2        | 0.010 | -1.671 | -1.216 | -0.928 | -1.782 | -0.939 | 0.455  | 0.017  | 0.523  | 0.824  |      |
| Magt1         | 0.001 | -1.677 | 4.156  | 4.133  | 4.192  | 4.143  | 5.833  | 5.519  | 6.111  | 5.869  |      |
| Tmem132b      | 0.015 | -1.684 | -0.975 | -1.293 | -1.384 | -0.247 | 0.709  | 0.350  | 0.740  | 1.038  | Down |
| Cacna1b       | 0.049 | -1.691 | -1.279 | -1.048 | -2.154 | -0.637 | 0.411  | 1.062  | -0.324 | 0.495  |      |
| Timm10b       | 0.004 | -1.698 | -0.543 | -0.512 | -0.700 | -0.418 | 1.155  | 1.289  | 0.630  | 1.544  |      |
| Ficd          | 0.024 | -1.699 | -0.998 | -0.414 | -1.774 | -0.806 | 0.701  | 0.185  | 0.881  | 1.038  |      |
| Hs3st3b1      | 0.022 | -1.700 | -2.412 | -2.564 | -2.290 | -2.381 | -0.712 | -1.633 | -0.252 | -0.251 |      |
| Hspa12a       | 0.001 | -1.704 | 0.131  | 0.127  | 0.159  | 0.107  | 1.835  | 1.620  | 1.613  | 2.273  | Down |
| Rpl27-ps1     | 0.029 | -1.707 | -2.060 | -2.397 | -2.353 | -1.432 | -0.354 | -1.105 | -0.241 | 0.286  |      |
| Hyou1         | 0.005 | -1.708 | 3.247  | 3.476  | 2.920  | 3.344  | 4.954  | 4.429  | 5.207  | 5.227  |      |
| Coch          | 0.006 | -1.709 | -0.941 | -0.843 | -1.096 | -0.883 | 0.768  | 0.202  | 1.254  | 0.849  |      |
| Lpl           | 0.004 | -1.709 | 0.481  | 0.098  | 0.391  | 0.953  | 2.190  | 1.884  | 2.358  | 2.327  | Down |
| Gm10941       | 0.021 | -1.715 | 0.568  | 0.694  | -0.110 | 1.119  | 2.282  | 2.045  | 1.931  | 2.872  |      |
| 5330413P13Rik | 0.019 | -1.717 | -0.593 | -0.347 | -1.394 | -0.039 | 1.124  | 0.764  | 1.312  | 1.296  |      |
| Dnajc6        | 0.031 | -1.718 | -0.547 | -0.334 | -1.474 | 0.167  | 1.171  | 1.067  | 0.877  | 1.570  |      |
| Gm14021       | 0.027 | -1.720 | -2.467 | -2.661 | -2.880 | -1.860 | -0.747 | -1.516 | -0.212 | -0.514 |      |
| Rtkn2         | 0.012 | -1.730 | -2.181 | -2.460 | -2.200 | -1.883 | -0.451 | -0.891 | 0.272  | -0.735 | Down |
| Ctrl          | 0.006 | -1.733 | -2.368 | -2.512 | -2.146 | -2.448 | -0.636 | -0.882 | -1.007 | -0.017 |      |
| Gm17208       | 0.034 | -1.734 | -2.319 | -1.405 | -2.625 | -2.926 | -0.585 | -1.006 | -0.024 | -0.726 |      |
| Zfp9          | 0.010 | -1.735 | 0.961  | 1.060  | 0.513  | 1.310  | 2.695  | 2.255  | 3.246  | 2.585  |      |
| Psd           | 0.027 | -1.735 | -2.347 | -1.684 | -3.189 | -2.168 | -0.612 | -1.054 | -0.207 | -0.576 |      |
| Tnr           | 0.023 | -1.739 | -2.048 | -1.876 | -2.795 | -1.473 | -0.309 | -0.451 | -0.708 | 0.232  | Up   |
| Ociad2        | 0.004 | -1.741 | 3.127  | 3.302  | 2.673  | 3.404  | 4.868  | 4.563  | 4.847  | 5.193  |      |
| Gnat2         | 0.006 | -1.743 | 0.465  | 0.734  | 0.649  | 0.012  | 2.208  | 1.888  | 2.679  | 2.056  |      |
| Pdx1          | 0.022 | -1.749 | 3.778  | 4.266  | 2.946  | 4.121  | 5.527  | 5.062  | 5.774  | 5.746  |      |
| Stk32a        | 0.017 | -1.756 | -0.095 | -0.668 | 0.132  | 0.250  | 1.660  | 1.160  | 1.505  | 2.316  |      |
| Sgk2          | 0.003 | -1.757 | -1.533 | -1.538 | -1.480 | -1.580 | 0.225  | -0.232 | 0.208  | 0.698  |      |
| Lphn3         | 0.002 | -1.758 | 1.921  | 1.901  | 1.566  | 2.296  | 3.679  | 3.738  | 3.395  | 3.904  |      |
| Tlcd2         | 0.008 | -1.759 | -1.958 | -1.546 | -2.562 | -1.766 | -0.199 | -0.477 | -0.259 | 0.138  | Up   |
| Aqp4          | 0.005 | -1.762 | -0.371 | -0.756 | -0.035 | -0.322 | 1.391  | 0.949  | 1.489  | 1.735  | Up   |
| Gm7985        | 0.012 | -1.763 | -1.611 | -1.114 | -2.153 | -1.565 | 0.152  | 0.007  | -0.227 | 0.677  |      |
| Wfs1          | 0.018 | -1.764 | 3.012  | 3.497  | 2.319  | 3.221  | 4.776  | 4.222  | 4.972  | 5.134  |      |
| Eya1          | 0.006 | -1.766 | 0.544  | 0.865  | -0.075 | 0.841  | 2.309  | 2.090  | 2.380  | 2.458  |      |
| Dlk1          | 0.001 | -1.766 | 3.329  | 3.418  | 3.302  | 3.266  | 5.094  | 4.669  | 5.266  | 5.348  | Up   |
| Atp2a2        | 0.015 | -1.766 | 5.891  | 6.246  | 5.130  | 6.297  | 7.657  | 7.243  | 7.842  | 7.886  |      |
| Nptxr         | 0.022 | -1.775 | -2.244 | -1.493 | -2.848 | -2.392 | -0.469 | -1.017 | -0.113 | -0.277 |      |
| Sec24d        | 0.003 | -1.777 | 0.938  | 1.151  | 0.760  | 0.902  | 2.714  | 2.224  | 2.883  | 3.036  |      |
| Asphd1        | 0.028 | -1.781 | 0.180  | 0.537  | -0.573 | 0.577  | 1.962  | 1.238  | 2.209  | 2.438  |      |
| Crmp1         | 0.023 | -1.788 | -3.225 | -2.710 | -2.929 | -4.038 | -1.438 | -0.935 | -1.460 | -1.918 | Up   |
| Gm17018       | 0.024 | -1.788 | -1.884 | -2.304 | -1.523 | -1.825 | -0.096 | -0.070 | 0.667  | -0.884 |      |
| Grip1         | 0.021 | -1.795 | -0.290 | -0.010 | -1.121 | 0.260  | 1.505  | 1.077  | 1.557  | 1.880  |      |
| Ccdc130       | 0.016 | -1.796 | -0.245 | -0.416 | 0.449  | -0.768 | 1.551  | 1.077  | 1.615  | 1.962  |      |
| Prkag2        | 0.019 | -1.799 | 0.560  | 1.242  | -0.215 | 0.653  | 2.359  | 1.935  | 2.482  | 2.659  |      |
| Klhl32        | 0.022 | -1.800 | 1.445  | 1.800  | 0.528  | 2.006  | 3.244  | 2.961  | 3.195  | 3.577  |      |
| Gm15464       | 0.008 | -1.801 | -2.107 | -2.275 | -2.079 | -1.966 | -0.306 | -0.052 | -1.000 | 0.135  |      |
| 1700113A16Rik | 0.033 | -1.807 | -1.893 | -1.533 | -2.922 | -1.224 | -0.086 | -0.420 | -0.143 | 0.307  |      |
| Acvr1c        | 0.012 | -1.808 | 1.870  | 1.875  | 1.185  | 2.549  | 3.677  | 3.434  | 3.726  | 3.871  |      |
| Gm26584       | 0.019 | -1.810 | 3.056  | 3.352  | 2.201  | 3.615  | 4.866  | 4.667  | 4.693  | 5.237  |      |
| Ripply3       | 0.012 | -1.818 | 1.694  | 2.133  | 0.999  | 1.951  | 3.513  | 3.112  | 3.581  | 3.846  |      |
| Sntg1         | 0.022 | -1.821 | -0.691 | -0.228 | -1.566 | -0.278 | 1.131  | 0.684  | 1.190  | 1.517  | Down |

|               |       |        |        |        |        |        |        |        |        |        |      |
|---------------|-------|--------|--------|--------|--------|--------|--------|--------|--------|--------|------|
| Ablim1        | 0.004 | -1.822 | 0.231  | 0.481  | -0.059 | 0.272  | 2.053  | 1.626  | 1.994  | 2.540  |      |
| Hspa12b       | 0.021 | -1.824 | -2.362 | -2.517 | -2.662 | -1.908 | -0.539 | -1.414 | -0.107 | -0.095 |      |
| Arid3b        | 0.029 | -1.824 | -0.254 | 0.315  | -1.062 | -0.013 | 1.570  | 1.744  | 0.879  | 2.087  |      |
| Reg2          | 0.000 | -1.828 | -2.064 | -2.013 | -2.232 | -1.949 | -0.237 | -0.193 | -0.511 | -0.007 |      |
| Gpr155        | 0.005 | -1.835 | -0.824 | -0.661 | -0.886 | -0.926 | 1.011  | 0.432  | 1.488  | 1.111  | Up   |
| Tnfaip8l3     | 0.002 | -1.837 | 0.587  | 0.739  | 0.113  | 0.909  | 2.424  | 2.325  | 2.376  | 2.569  |      |
| Gm12908       | 0.014 | -1.841 | -0.958 | -1.331 | -0.620 | -0.922 | 0.884  | 0.529  | 1.662  | 0.460  |      |
| BC007180      | 0.004 | -1.843 | -1.400 | -1.438 | -1.886 | -0.876 | 0.443  | 0.234  | 0.607  | 0.490  |      |
| Cox6a2        | 0.029 | -1.845 | -2.624 | -2.906 | -3.125 | -1.841 | -0.779 | -1.502 | -0.198 | -0.637 | Down |
| Hist2h3c1     | 0.009 | -1.847 | 3.695  | 4.268  | 3.071  | 3.746  | 5.542  | 5.202  | 5.737  | 5.687  |      |
| 5530401A14Rik | 0.017 | -1.848 | -2.302 | -1.978 | -3.089 | -1.838 | -0.453 | -0.771 | -0.641 | 0.052  | Up   |
| 1700022I11Rik | 0.017 | -1.857 | -2.761 | -2.190 | -2.742 | -3.352 | -0.904 | -0.932 | -0.321 | -1.459 |      |
| Prl           | 0.034 | -1.868 | -2.724 | -3.477 | -1.696 | -2.998 | -0.856 | -1.333 | -0.766 | -0.468 |      |
| Gm11339       | 0.039 | -1.870 | -0.541 | -0.627 | -1.431 | 0.437  | 1.329  | 1.301  | 0.830  | 1.857  | Up   |
| Gpr137b       | 0.005 | -1.874 | -0.606 | -0.315 | -1.072 | -0.431 | 1.268  | 0.953  | 1.101  | 1.751  | Up   |
| C2cd2l        | 0.003 | -1.875 | -1.910 | -1.430 | -2.349 | -1.951 | -0.035 | -0.215 | -0.007 | 0.117  |      |
| Cabp7         | 0.037 | -1.878 | -1.405 | -0.803 | -2.577 | -0.834 | 0.473  | 0.250  | 0.358  | 0.810  |      |
| Muc20         | 0.038 | -1.878 | -3.068 | -3.556 | -3.775 | -1.875 | -1.191 | -1.143 | -1.453 | -0.976 |      |
| 9330182L06Rik | 0.045 | -1.892 | 1.844  | 2.170  | 0.611  | 2.749  | 3.736  | 3.461  | 3.741  | 4.004  |      |
| Map7d2        | 0.019 | -1.902 | -1.312 | -1.832 | -1.635 | -0.468 | 0.591  | 0.832  | 0.884  | 0.056  | Down |
| Pdzrn3        | 0.005 | -1.907 | -0.757 | -0.446 | -1.316 | -0.508 | 1.150  | 0.793  | 1.355  | 1.303  | Up   |
| Glp1r         | 0.016 | -1.914 | -0.293 | 0.219  | -0.737 | -0.361 | 1.621  | 0.955  | 1.621  | 2.288  |      |
| Dgkg          | 0.036 | -1.919 | -3.059 | -2.831 | -4.009 | -2.337 | -1.140 | -0.985 | -1.845 | -0.591 |      |
| Trpm3         | 0.020 | -1.921 | -2.102 | -2.671 | -2.396 | -1.238 | -0.181 | -0.367 | 0.330  | -0.506 |      |
| Gmppa         | 0.004 | -1.921 | 2.654  | 3.098  | 2.530  | 2.333  | 4.575  | 4.100  | 4.749  | 4.876  |      |
| Nostrin       | 0.018 | -1.929 | -2.048 | -2.299 | -2.655 | -1.191 | -0.120 | -0.347 | 0.354  | -0.367 | Down |
| Dgkh          | 0.017 | -1.930 | -1.726 | -1.162 | -2.629 | -1.387 | 0.204  | -0.123 | 0.257  | 0.479  | Up   |
| Chrm3         | 0.006 | -1.931 | -2.365 | -1.816 | -2.357 | -2.922 | -0.434 | -0.810 | -0.215 | -0.277 | Down |
| Spock2        | 0.027 | -1.941 | 2.080  | 2.618  | 1.072  | 2.551  | 4.021  | 3.507  | 4.277  | 4.280  | Down |
| Gm21844       | 0.002 | -1.942 | -2.640 | -2.337 | -3.141 | -2.443 | -0.699 | -0.518 | -0.661 | -0.916 |      |
| Gm14340       | 0.025 | -1.948 | -3.374 | -3.850 | -3.484 | -2.786 | -1.426 | -1.024 | -2.342 | -0.911 |      |
| Tmem229b      | 0.016 | -1.949 | 0.476  | 1.372  | 0.104  | -0.047 | 2.425  | 2.271  | 2.788  | 2.215  |      |
| Gm20448       | 0.021 | -1.950 | 1.424  | 1.973  | 0.519  | 1.779  | 3.374  | 2.843  | 3.719  | 3.560  |      |
| Isg20         | 0.031 | -1.965 | 0.247  | 0.927  | -0.828 | 0.642  | 2.212  | 1.709  | 2.588  | 2.339  |      |
| Robo1         | 0.003 | -1.971 | 0.451  | 0.518  | 0.005  | 0.831  | 2.423  | 2.092  | 2.624  | 2.553  |      |
| Gm17586       | 0.025 | -1.974 | -1.453 | -1.554 | -2.188 | -0.616 | 0.522  | 0.516  | 1.108  | -0.060 |      |
| 4933421O10Rik | 0.003 | -1.979 | -1.510 | -1.194 | -1.775 | -1.562 | 0.468  | 0.593  | -0.051 | 0.863  |      |
| C2cd4b        | 0.025 | -1.982 | -3.150 | -2.237 | -3.456 | -3.758 | -1.169 | -1.605 | -0.523 | -1.378 | Up   |
| Gng12         | 0.012 | -1.986 | 4.523  | 4.920  | 3.773  | 4.878  | 6.509  | 6.011  | 6.732  | 6.784  |      |
| 4922501L14Rik | 0.009 | -1.993 | -0.754 | -0.906 | -1.130 | -0.225 | 1.239  | 0.609  | 1.676  | 1.433  |      |
| 4930564G21Rik | 0.005 | -1.997 | -0.818 | -0.642 | -0.513 | -1.300 | 1.179  | 0.806  | 1.058  | 1.671  |      |
| Slc30a8       | 0.016 | -2.000 | 3.644  | 3.409  | 2.996  | 4.527  | 5.644  | 5.345  | 5.598  | 5.989  |      |
| Mark1         | 0.026 | -2.001 | -3.085 | -2.395 | -2.721 | -4.138 | -1.084 | -1.517 | -0.869 | -0.866 |      |
| Gm13066       | 0.011 | -2.002 | -1.674 | -1.918 | -1.400 | -1.702 | 0.328  | -0.511 | 0.727  | 0.769  |      |
| Nfasc         | 0.015 | -2.013 | -0.887 | -0.508 | -1.727 | -0.426 | 1.125  | 0.611  | 1.451  | 1.315  |      |
| Gabbr2        | 0.008 | -2.016 | -1.754 | -1.249 | -2.524 | -1.489 | 0.262  | -0.025 | 0.422  | 0.388  |      |
| Gm14648       | 0.014 | -2.019 | -2.461 | -1.622 | -2.742 | -3.018 | -0.442 | -0.876 | -0.059 | -0.391 |      |
| Upp2          | 0.015 | -2.022 | -0.796 | -0.617 | -1.677 | -0.095 | 1.225  | 1.194  | 0.947  | 1.535  |      |
| Adora3        | 0.035 | -2.024 | -1.073 | -0.450 | -2.171 | -0.599 | 0.951  | 0.285  | 1.417  | 1.150  |      |
| Hopx          | 0.020 | -2.025 | -1.066 | -0.928 | -1.823 | -0.447 | 0.959  | 0.421  | 1.648  | 0.807  | Up   |
| Myt1l         | 0.005 | -2.034 | -0.638 | -0.427 | -1.310 | -0.177 | 1.396  | 1.219  | 1.427  | 1.543  |      |
| Cntn1         | 0.007 | -2.035 | -0.063 | -0.154 | -0.452 | 0.416  | 1.971  | 1.385  | 2.472  | 2.057  | Down |
| Dnah9         | 0.026 | -2.059 | 2.147  | 2.715  | 0.988  | 2.737  | 4.205  | 3.933  | 4.266  | 4.417  | Up   |
| Gm15824       | 0.005 | -2.067 | 1.011  | 1.411  | 0.711  | 0.912  | 3.078  | 2.611  | 3.636  | 2.987  |      |
| Scnn1b        | 0.018 | -2.073 | -2.913 | -3.050 | -2.269 | -3.419 | -0.839 | -1.393 | -1.089 | -0.036 |      |
| Gm14219       | 0.024 | -2.077 | -1.094 | -0.791 | -1.595 | -0.896 | 0.983  | 1.721  | -0.034 | 1.264  |      |

|                |       |        |        |        |        |        |        |        |        |        |      |
|----------------|-------|--------|--------|--------|--------|--------|--------|--------|--------|--------|------|
| Derl3          | 0.005 | -2.087 | -1.445 | -1.002 | -2.147 | -1.186 | 0.642  | 0.662  | 0.824  | 0.440  |      |
| Dcdc5          | 0.007 | -2.088 | 0.178  | 0.333  | -0.101 | 0.303  | 2.266  | 1.691  | 2.131  | 2.977  |      |
| Rasgrf1        | 0.001 | -2.091 | -0.425 | -0.342 | -0.792 | -0.141 | 1.665  | 1.516  | 1.623  | 1.857  |      |
| Gm13814        | 0.005 | -2.092 | -1.260 | -0.961 | -1.823 | -0.996 | 0.832  | 0.432  | 1.319  | 0.746  |      |
| Rhbdl2         | 0.003 | -2.103 | -0.672 | -1.159 | -0.719 | -0.137 | 1.431  | 1.456  | 1.703  | 1.135  |      |
| Bcl6b          | 0.034 | -2.112 | -2.566 | -1.699 | -3.640 | -2.357 | -0.454 | -1.058 | -0.442 | 0.139  |      |
| Opn3           | 0.011 | -2.117 | -2.738 | -3.265 | -1.899 | -3.049 | -0.621 | -0.565 | -0.998 | -0.301 |      |
| Gm15910        | 0.006 | -2.128 | -0.831 | -0.291 | -1.341 | -0.861 | 1.297  | 0.815  | 1.669  | 1.406  |      |
| Z900005J15Rik  | 0.007 | -2.128 | -0.033 | 0.289  | -0.629 | 0.241  | 2.095  | 2.127  | 1.585  | 2.572  |      |
| Zfp365         | 0.005 | -2.130 | -3.057 | -3.380 | -2.336 | -3.455 | -0.927 | -0.745 | -1.192 | -0.844 | Down |
| Papss2         | 0.011 | -2.133 | 4.217  | 4.489  | 3.364  | 4.797  | 6.349  | 5.983  | 6.440  | 6.625  |      |
| Itpkb          | 0.019 | -2.143 | -1.336 | -0.807 | -2.090 | -1.111 | 0.807  | -0.004 | 1.075  | 1.351  |      |
| E130309F12Rik  | 0.007 | -2.145 | 0.450  | 0.539  | -0.296 | 1.107  | 2.595  | 2.416  | 2.616  | 2.753  |      |
| Ero1lb         | 0.004 | -2.147 | 3.775  | 3.819  | 3.236  | 4.268  | 5.922  | 5.487  | 6.072  | 6.207  |      |
| Spock1         | 0.010 | -2.150 | -3.012 | -2.422 | -3.448 | -3.165 | -0.862 | -1.404 | -0.963 | -0.218 |      |
| Gm22662        | 0.018 | -2.154 | -0.901 | -0.792 | -0.011 | -1.898 | 1.253  | 1.152  | 1.145  | 1.463  |      |
| Sdf2l1         | 0.005 | -2.157 | 3.635  | 3.522  | 3.621  | 3.762  | 5.792  | 5.045  | 6.119  | 6.212  |      |
| Ush2a          | 0.011 | -2.158 | -0.174 | 0.563  | -1.020 | -0.064 | 1.984  | 1.933  | 2.286  | 1.733  | Up   |
| Mcc            | 0.000 | -2.161 | -1.206 | -1.132 | -1.266 | -1.221 | 0.954  | 0.810  | 0.801  | 1.252  |      |
| Nudt6          | 0.034 | -2.161 | -2.965 | -2.170 | -3.711 | -3.013 | -0.804 | -1.735 | -0.725 | 0.048  |      |
| Maob           | 0.003 | -2.188 | 3.151  | 3.093  | 2.699  | 3.662  | 5.340  | 4.977  | 5.431  | 5.611  | Down |
| A530058N18Rik  | 0.006 | -2.195 | 1.525  | 1.820  | 0.771  | 1.984  | 3.720  | 3.461  | 3.719  | 3.981  |      |
| Robo2          | 0.001 | -2.205 | 1.928  | 2.022  | 1.445  | 2.317  | 4.133  | 3.910  | 4.223  | 4.267  |      |
| Ntm            | 0.002 | -2.208 | -0.822 | -0.831 | -0.439 | -1.195 | 1.386  | 0.914  | 1.723  | 1.521  |      |
| Gm6568         | 0.019 | -2.214 | -2.834 | -1.706 | -3.247 | -3.549 | -0.620 | -0.886 | -0.471 | -0.502 |      |
| BC037034       | 0.011 | -2.214 | -2.016 | -2.717 | -1.683 | -1.647 | 0.199  | 0.874  | 0.042  | -0.320 |      |
| Igsf1          | 0.001 | -2.221 | 0.970  | 0.804  | 0.801  | 1.303  | 3.191  | 3.001  | 3.060  | 3.512  | Down |
| Slitrk6        | 0.003 | -2.224 | 2.184  | 2.029  | 1.776  | 2.748  | 4.408  | 4.059  | 4.624  | 4.542  | Down |
| Slc2a5         | 0.010 | -2.242 | 0.445  | 0.897  | -0.191 | 0.629  | 2.687  | 1.977  | 3.205  | 2.878  |      |
| Galnt6         | 0.001 | -2.254 | -3.288 | -3.021 | -3.563 | -3.279 | -1.034 | -1.400 | -0.675 | -1.026 |      |
| Sv2b           | 0.003 | -2.257 | -1.481 | -1.556 | -1.657 | -1.231 | 0.775  | 0.107  | 1.051  | 1.168  | Down |
| Slc16a9        | 0.010 | -2.261 | 0.249  | 0.725  | -0.326 | 0.349  | 2.510  | 1.755  | 2.959  | 2.816  |      |
| Tdo2           | 0.033 | -2.264 | -2.145 | -1.172 | -3.188 | -2.075 | 0.119  | 0.513  | -0.673 | 0.518  |      |
| Cdhr1          | 0.021 | -2.295 | 0.281  | 0.745  | -0.753 | 0.852  | 2.576  | 1.908  | 2.847  | 2.974  |      |
| Scg2           | 0.005 | -2.314 | 5.018  | 5.154  | 4.379  | 5.521  | 7.332  | 6.847  | 7.481  | 7.669  | Up   |
| Wdr96          | 0.014 | -2.321 | -0.073 | 0.661  | -1.130 | 0.249  | 2.247  | 2.514  | 2.223  | 2.006  |      |
| Zfp786         | 0.006 | -2.324 | -2.407 | -1.803 | -2.558 | -2.860 | -0.083 | -0.327 | 0.542  | -0.464 |      |
| Gm26750        | 0.014 | -2.332 | -3.316 | -3.069 | -4.289 | -2.590 | -0.984 | -0.790 | -1.460 | -0.703 |      |
| Z210010C04Rik  | 0.000 | -2.337 | -0.240 | -0.252 | -0.043 | -0.425 | 2.098  | 1.902  | 1.925  | 2.466  |      |
| Gm15681        | 0.033 | -2.342 | -2.952 | -1.702 | -4.037 | -3.116 | -0.610 | -0.084 | -0.736 | -1.010 |      |
| Prss2          | 0.036 | -2.357 | -0.956 | -2.024 | 0.435  | -1.281 | 1.401  | 1.000  | 1.435  | 1.767  |      |
| Gucy1a3        | 0.016 | -2.365 | -2.921 | -2.380 | -3.872 | -2.511 | -0.556 | -0.886 | -0.936 | 0.155  |      |
| Prnd           | 0.004 | -2.368 | -3.471 | -4.069 | -3.288 | -3.055 | -1.103 | -1.071 | -0.654 | -1.583 |      |
| AI836003       | 0.018 | -2.385 | -2.306 | -2.167 | -1.386 | -3.366 | 0.079  | -0.253 | -0.036 | 0.525  |      |
| Gm17388        | 0.002 | -2.393 | -1.425 | -1.638 | -1.264 | -1.375 | 0.967  | 0.367  | 1.302  | 1.232  |      |
| Gm2389         | 0.008 | -2.412 | 0.145  | 0.115  | 0.311  | 0.009  | 2.557  | 3.209  | 2.847  | 1.614  |      |
| Ffar3          | 0.001 | -2.414 | -0.692 | -0.494 | -0.479 | -1.103 | 1.722  | 1.353  | 2.121  | 1.694  |      |
| Z4930550C14Rik | 0.015 | -2.435 | 0.898  | 0.814  | 0.057  | 1.822  | 3.333  | 2.806  | 3.825  | 3.367  | Up   |
| Phactr1        | 0.003 | -2.441 | 3.285  | 2.652  | 3.709  | 3.494  | 5.726  | 5.483  | 6.076  | 5.619  | Down |
| Gm19357        | 0.041 | -2.448 | -2.679 | -1.961 | -4.180 | -1.897 | -0.231 | -0.552 | 0.430  | -0.572 |      |
| Sdk2           | 0.035 | -2.454 | -2.377 | -1.743 | -3.721 | -1.665 | 0.078  | -0.711 | 0.382  | 0.562  |      |
| Sycp1          | 0.013 | -2.454 | -0.563 | 0.323  | -1.471 | -0.541 | 1.891  | 2.217  | 2.031  | 1.425  |      |
| Gm13709        | 0.007 | -2.458 | -2.472 | -2.169 | -1.973 | -3.275 | -0.014 | 0.064  | -0.495 | 0.388  |      |
| Nkx2-1         | 0.001 | -2.464 | -3.206 | -3.106 | -3.518 | -2.995 | -0.742 | -0.422 | -1.158 | -0.646 |      |
| Slc2a2         | 0.000 | -2.499 | 2.664  | 2.812  | 2.435  | 2.744  | 5.162  | 4.890  | 5.312  | 5.285  |      |
| Try5           | 0.039 | -2.500 | -2.281 | -1.827 | -1.183 | -3.832 | 0.219  | 0.431  | -0.235 | 0.462  |      |

|               |       |        |        |        |        |        |        |        |        |        |      |
|---------------|-------|--------|--------|--------|--------|--------|--------|--------|--------|--------|------|
| Dpf3          | 0.027 | -2.524 | -0.455 | 0.665  | -1.792 | -0.238 | 2.069  | 1.976  | 1.811  | 2.418  |      |
| Dmbt1         | 0.001 | -2.524 | -2.803 | -2.872 | -3.091 | -2.445 | -0.279 | -0.328 | -0.547 | 0.038  |      |
| G6pc2         | 0.002 | -2.535 | 3.552  | 3.291  | 3.297  | 4.068  | 6.087  | 5.715  | 6.106  | 6.440  |      |
| Sytl4         | 0.004 | -2.542 | 4.045  | 4.235  | 3.313  | 4.587  | 6.587  | 6.190  | 6.719  | 6.851  |      |
| B230217C12Rik | 0.007 | -2.550 | -0.157 | -0.085 | -0.834 | 0.449  | 2.393  | 1.864  | 3.010  | 2.306  |      |
| Pitpnm3       | 0.006 | -2.551 | -3.172 | -2.625 | -4.140 | -2.751 | -0.622 | -0.705 | -0.539 | -0.621 |      |
| Gmpr          | 0.006 | -2.555 | -2.993 | -2.213 | -3.754 | -3.011 | -0.437 | -0.539 | -0.629 | -0.144 | Down |
| Gm3755        | 0.009 | -2.558 | -3.982 | -4.062 | -4.360 | -3.524 | -1.424 | -1.577 | -2.186 | -0.510 |      |
| Rims3         | 0.012 | -2.558 | -1.357 | -0.652 | -2.465 | -0.952 | 1.202  | 0.890  | 1.477  | 1.239  |      |
| Chst10        | 0.027 | -2.559 | -3.655 | -4.623 | -3.521 | -2.822 | -1.097 | -2.096 | -0.907 | -0.287 |      |
| Gm11449       | 0.005 | -2.559 | 0.626  | 1.452  | -0.065 | 0.493  | 3.185  | 3.092  | 3.003  | 3.460  |      |
| Gm14817       | 0.019 | -2.560 | -2.046 | -2.271 | -3.075 | -0.791 | 0.515  | 0.663  | 0.468  | 0.413  |      |
| Gpr137b-ps    | 0.000 | -2.569 | -0.744 | -0.743 | -0.573 | -0.914 | 1.825  | 1.686  | 1.902  | 1.888  |      |
| Trpm5         | 0.016 | -2.573 | -1.138 | -2.054 | -0.890 | -0.470 | 1.435  | 0.826  | 1.212  | 2.268  |      |
| Gm281         | 0.000 | -2.591 | -1.345 | -1.531 | -1.505 | -0.999 | 1.247  | 1.096  | 1.331  | 1.313  |      |
| Zg16          | 0.033 | -2.595 | -2.745 | -3.832 | -3.051 | -1.352 | -0.149 | -0.428 | -0.572 | 0.552  |      |
| Gm15810       | 0.002 | -2.605 | -0.525 | -0.657 | -0.876 | -0.040 | 2.081  | 1.698  | 2.032  | 2.513  |      |
| Ntrk2         | 0.004 | -2.653 | -0.890 | -0.719 | -1.513 | -0.438 | 1.762  | 1.196  | 2.133  | 1.958  | Down |
| Chrna3        | 0.025 | -2.654 | -2.822 | -1.380 | -3.525 | -3.563 | -0.169 | -0.478 | 0.321  | -0.350 |      |
| Gip           | 0.010 | -2.668 | 1.297  | 2.379  | 0.512  | 0.999  | 3.965  | 3.674  | 4.088  | 4.133  |      |
| C130080G10Rik | 0.009 | -2.679 | -2.462 | -1.464 | -3.276 | -2.646 | 0.217  | 0.518  | -0.138 | 0.273  |      |
| Pecam1        | 0.032 | -2.683 | -2.208 | -2.102 | -1.032 | -3.489 | 0.475  | 0.887  | 0.911  | -0.372 |      |
| Dnah7a        | 0.005 | -2.703 | -3.228 | -2.692 | -3.899 | -3.093 | -0.525 | -1.117 | -0.414 | -0.043 |      |
| Gcgr          | 0.000 | -2.717 | -3.868 | -3.887 | -3.915 | -3.801 | -1.150 | -1.254 | -0.741 | -1.456 | Up   |
| Gm13578       | 0.020 | -2.719 | -2.860 | -2.927 | -1.883 | -3.769 | -0.141 | -1.110 | 0.265  | 0.422  |      |
| Bace2         | 0.002 | -2.751 | -1.583 | -2.096 | -1.315 | -1.337 | 1.168  | 0.610  | 1.418  | 1.475  |      |
| Gm14616       | 0.001 | -2.786 | -0.669 | -0.756 | -0.975 | -0.277 | 2.117  | 1.837  | 1.919  | 2.595  |      |
| Fabp7         | 0.021 | -2.805 | -2.434 | -2.734 | -3.538 | -1.032 | 0.370  | 0.310  | 0.733  | 0.068  |      |
| Tmem215       | 0.001 | -2.809 | 1.728  | 1.506  | 1.470  | 2.207  | 4.536  | 4.120  | 4.813  | 4.675  | Down |
| Syndig1l      | 0.010 | -2.816 | -2.816 | -2.957 | -3.498 | -1.992 | 0.000  | -0.751 | 0.054  | 0.699  |      |
| Chrn4         | 0.018 | -2.840 | -1.770 | -1.069 | -3.209 | -1.033 | 1.069  | 0.838  | 1.284  | 1.086  |      |
| Gm15812       | 0.045 | -2.844 | -1.963 | -0.707 | -3.733 | -1.450 | 0.881  | 0.116  | 1.399  | 1.127  |      |
| Gm13093       | 0.002 | -2.848 | -3.988 | -3.685 | -4.489 | -3.791 | -1.140 | -1.635 | -1.251 | -0.534 |      |
| 1700112D23Rik | 0.000 | -2.868 | 0.669  | 0.688  | 0.999  | 0.319  | 3.537  | 3.166  | 3.646  | 3.798  | Up   |
| Ppp1r1a       | 0.002 | -2.868 | 0.457  | 0.611  | -0.167 | 0.927  | 3.325  | 2.886  | 3.447  | 3.643  |      |
| Kcnq4         | 0.006 | -2.879 | -2.849 | -2.584 | -3.874 | -2.089 | 0.030  | 0.137  | -0.172 | 0.126  | Up   |
| Gm17399       | 0.036 | -2.925 | -4.282 | -5.035 | -3.254 | -4.556 | -1.357 | -0.403 | -2.907 | -0.761 |      |
| Mapt          | 0.004 | -2.948 | 0.301  | 0.633  | -0.574 | 0.845  | 3.250  | 2.811  | 3.652  | 3.286  |      |
| Ins2          | 0.001 | -2.958 | 8.271  | 8.332  | 7.940  | 8.541  | 11.228 | 10.713 | 11.369 | 11.604 |      |
| Cntfr         | 0.001 | -2.963 | -1.579 | -1.487 | -1.946 | -1.303 | 1.385  | 1.042  | 1.130  | 1.982  |      |
| P2ry6         | 0.002 | -2.970 | -0.464 | -0.013 | -0.447 | -0.933 | 2.506  | 1.897  | 2.651  | 2.969  |      |
| Arhgap36      | 0.004 | -2.987 | 1.573  | 1.618  | 0.836  | 2.264  | 4.559  | 4.049  | 4.778  | 4.851  | Down |
| Nnat          | 0.005 | -3.002 | 5.675  | 6.067  | 4.738  | 6.220  | 8.677  | 8.112  | 8.938  | 8.981  |      |
| O610038L08Rik | 0.039 | -3.032 | -2.816 | -1.761 | -4.486 | -2.203 | 0.215  | 0.159  | 1.168  | -0.681 |      |
| A130066N16Rik | 0.006 | -3.035 | -1.734 | -1.681 | -2.563 | -0.958 | 1.300  | 0.667  | 1.558  | 1.676  |      |
| Gm25483       | 0.021 | -3.055 | 1.307  | -0.113 | 1.668  | 2.366  | 4.362  | 3.607  | 4.837  | 4.642  |      |
| Il1r1         | 0.001 | -3.069 | 1.549  | 1.662  | 1.123  | 1.860  | 4.617  | 4.093  | 4.789  | 4.970  |      |
| Casc1         | 0.046 | -3.098 | -3.191 | -1.319 | -4.609 | -3.646 | -0.093 | -0.917 | -0.069 | 0.707  | Up   |
| Gm12002       | 0.008 | -3.111 | -2.959 | -4.054 | -2.973 | -1.849 | 0.153  | 0.095  | 0.075  | 0.288  |      |
| RP24-480M3.2  | 0.016 | -3.113 | 0.072  | -1.297 | 1.109  | 0.405  | 3.185  | 2.723  | 3.731  | 3.101  |      |
| P2ry1         | 0.000 | -3.140 | 1.272  | 1.186  | 0.915  | 1.715  | 4.412  | 4.132  | 4.398  | 4.708  |      |
| C630016N16Rik | 0.032 | -3.144 | -2.740 | -1.224 | -4.390 | -2.606 | 0.405  | 0.708  | -0.269 | 0.774  |      |
| Ism1          | 0.045 | -3.146 | -2.187 | -1.728 | -4.170 | -0.664 | 0.959  | 0.667  | 1.644  | 0.566  | Up   |
| Gm10615       | 0.004 | -3.179 | -4.333 | -4.086 | -4.305 | -4.607 | -1.154 | -2.090 | -0.371 | -1.002 |      |
| RP23-184F1.3  | 0.001 | -3.199 | -1.969 | -2.056 | -2.275 | -1.577 | 1.230  | 1.842  | 0.644  | 1.205  |      |
| Pnlip         | 0.001 | -3.246 | -1.118 | -1.730 | -0.842 | -0.782 | 2.128  | 1.887  | 2.171  | 2.326  |      |



|               |       |         |        |        |        |        |        |        |        |        |      |
|---------------|-------|---------|--------|--------|--------|--------|--------|--------|--------|--------|------|
| Ins1          | 0.001 | -3.260  | 4.194  | 4.164  | 3.900  | 4.519  | 7.454  | 6.951  | 7.541  | 7.871  |      |
| Gm26849       | 0.009 | -3.274  | -2.292 | -1.145 | -2.423 | -3.309 | 0.981  | 0.870  | 0.527  | 1.546  |      |
| D130020L05Rik | 0.005 | -3.337  | -4.179 | -3.913 | -3.869 | -4.756 | -0.842 | -1.567 | -1.159 | 0.199  |      |
| Prss53        | 0.005 | -3.383  | -2.882 | -2.220 | -3.924 | -2.502 | 0.501  | 0.047  | 0.503  | 0.953  | Down |
| Gm12962       | 0.002 | -3.499  | -2.395 | -3.010 | -1.644 | -2.531 | 1.104  | 1.132  | 0.699  | 1.482  |      |
| Gm26035       | 0.018 | -3.506  | 0.665  | 2.303  | -0.571 | 0.264  | 4.171  | 3.535  | 4.559  | 4.419  |      |
| Try4          | 0.001 | -3.608  | -3.030 | -3.726 | -2.530 | -2.832 | 0.579  | 0.317  | 0.759  | 0.660  |      |
| Phactr3       | 0.005 | -3.731  | -4.377 | -5.366 | -4.200 | -3.565 | -0.647 | 0.028  | -1.453 | -0.514 | Down |
| C330002G04Rik | 0.003 | -3.962  | -3.169 | -2.644 | -4.185 | -2.679 | 0.793  | 1.461  | 0.335  | 0.584  |      |
| Glycam1       | 0.000 | -3.983  | -3.373 | -3.793 | -3.012 | -3.314 | 0.609  | 0.347  | 0.592  | 0.890  |      |
| Npy           | 0.000 | -4.115  | 0.563  | 0.018  | 0.673  | 0.999  | 4.678  | 4.357  | 4.762  | 4.914  | Down |
| Vimp          | 0.017 | -4.230  | 5.358  | 6.742  | 5.787  | 3.544  | 9.587  | 8.885  | 9.311  | 10.566 |      |
| Prss22        | 0.002 | -4.737  | -6.171 | -5.233 | -6.640 | -6.640 | -1.434 | -1.408 | -0.672 | -2.222 | Down |
| Gm3852        | 0.006 | -4.907  | -5.792 | -4.096 | -6.640 | -6.640 | -0.885 | -0.106 | -1.222 | -1.328 |      |
| Rps15-ps2     | 0.000 | -5.058  | -6.640 | -6.640 | -6.640 | -6.640 | -1.582 | -1.998 | -2.040 | -0.709 |      |
| Eif3s6-ps1    | 0.000 | -5.216  | -6.640 | -6.640 | -6.640 | -6.640 | -1.424 | -2.291 | -1.139 | -0.841 |      |
| Mettl21b      | 0.000 | -5.255  | -2.714 | -2.198 | -3.354 | -2.591 | 2.541  | 2.148  | 2.723  | 2.751  |      |
| Gm26652       | 0.000 | -5.317  | -6.640 | -6.640 | -6.640 | -6.640 | -1.323 | -1.605 | -1.623 | -0.740 |      |
| Kcnk9         | 0.000 | -5.498  | -3.354 | -2.754 | -4.295 | -3.012 | 2.144  | 2.106  | 2.269  | 2.056  |      |
| Gm24139       | 0.000 | -6.516  | -6.640 | -6.640 | -6.640 | -6.640 | -0.124 | 0.399  | -0.034 | -0.736 |      |
| Gm14586       | 0.000 | -6.624  | -6.640 | -6.640 | -6.640 | -6.640 | -0.016 | -0.305 | -0.323 | 0.579  |      |
| Metazoa_SRP   | 0.000 | -6.915  | -6.640 | -6.640 | -6.640 | -6.640 | 0.275  | 0.577  | -0.856 | 1.105  |      |
| Gm6181        | 0.000 | -7.560  | -6.640 | -6.640 | -6.640 | -6.640 | 0.920  | 0.392  | 1.374  | 0.994  |      |
| Gm6265        | 0.000 | -7.595  | -6.640 | -6.640 | -6.640 | -6.640 | 0.955  | -0.491 | 1.660  | 1.695  |      |
| Klk14         | 0.000 | -8.385  | -5.888 | -6.640 | -4.383 | -6.640 | 2.497  | 2.754  | 1.988  | 2.749  |      |
| Gm25184       | 0.000 | -9.770  | -6.640 | -6.640 | -6.640 | -6.640 | 3.130  | 3.244  | 2.829  | 3.318  |      |
| Gm24666       | 0.000 | -10.828 | -6.640 | -6.640 | -6.640 | -6.640 | 4.188  | 4.239  | 4.221  | 4.103  |      |
| Gm25415       | 0.000 | -11.146 | -6.640 | -6.640 | -6.640 | -6.640 | 4.506  | 4.890  | 3.872  | 4.755  |      |
| AL669901.1    | 0.000 | -13.130 | -6.640 | -6.640 | -6.640 | -6.640 | 6.490  | 6.346  | 6.913  | 6.211  |      |
| Gm26140       | 0.000 | -14.095 | -6.640 | -6.640 | -6.640 | -6.640 | 7.455  | 6.978  | 7.545  | 7.843  |      |
| Gm22618       | 0.000 | -15.383 | -6.640 | -6.640 | -6.640 | -6.640 | 8.743  | 8.794  | 8.776  | 8.658  |      |
| Gm22591       | 0.000 | -16.045 | -6.640 | -6.640 | -6.640 | -6.640 | 9.405  | 9.123  | 10.105 | 8.988  |      |
