# Supplementary material
Source: publisher figshare collection journal article supplement (https://diabetesjournals.figshare.com/articles/dataset/_/26317288)
Supplement: Supplementary file 3 [file 1]

|               |          | Log2-transformed results |                 |                |           |           |           |          |          | No log transform |             |
|---------------|----------|--------------------------|-----------------|----------------|-----------|-----------|-----------|----------|----------|------------------|-------------|
| Gene_Symbol   | p-values | Fold change              | Average-Control | Average-mutant | control 1 | control 2 | control 3 | mutant 1 | mutant 2 | Gene-symbol      | Fold change |
| Alox15        | 0.005    | 11.144                   | -3.596          | 7.548          | -3.434    | -1.702    | -5.652    | 7.025    | 8.071    | Aldob            | 1537.190    |
| Aldob         | 0.000    | 10.596                   | -0.695          | 9.901          | -1.149    | -0.129    | -0.808    | 9.500    | 10.302   | Alox15           | 1425.048    |
| Pdk4          | 0.001    | 10.510                   | -3.315          | 7.195          | -3.950    | -3.733    | -2.262    | 6.928    | 7.462    | Pdk4             | 1282.162    |
| Rps3a3        | 0.001    | 10.252                   | -3.549          | 6.704          | -3.807    | -4.397    | -2.441    | 6.835    | 6.573    | Rps3a3           | 1035.267    |
| Gm8730        | 0.000    | 9.663                    | -3.145          | 6.519          | -3.071    | -3.660    | -2.704    | 6.396    | 6.641    | Gm8730           | 784.049     |
| Gm4791        | 0.000    | 8.923                    | -2.381          | 6.542          | -2.168    | -2.173    | -2.802    | 6.139    | 6.944    | Gm4791           | 493.294     |
| Foxc1         | 0.003    | 8.726                    | -4.955          | 3.771          | -4.685    | -6.275    | -3.904    | 3.335    | 4.207    | Foxc1            | 360.334     |
| Pcp4l1        | 0.000    | 8.489                    | -0.560          | 7.929          | -0.095    | -0.742    | -0.844    | 7.711    | 8.146    | Pcp4l1           | 352.484     |
| Acot1         | 0.002    | 8.226                    | -4.271          | 3.955          | -5.109    | -4.699    | -3.005    | 3.785    | 4.125    | Lepr             | 292.883     |
| Lamb2         | 0.000    | 8.153                    | -1.431          | 6.722          | -1.421    | -1.526    | -1.347    | 6.646    | 6.798    | Lamb2            | 283.695     |
| Lepr          | 0.002    | 8.002                    | -5.697          | 2.305          | -5.956    | -5.961    | -5.174    | 3.174    | 1.436    | Acot1            | 242.999     |
| Pcdh20        | 0.000    | 7.935                    | -3.039          | 4.896          | -2.788    | -3.601    | -2.727    | 4.831    | 4.962    | Pcdh20           | 235.459     |
| Ifitm1        | 0.001    | 7.905                    | -2.569          | 5.337          | -1.946    | -2.273    | -3.486    | 5.225    | 5.448    | Ifitm1           | 217.819     |
| Egln3         | 0.002    | 7.895                    | -4.820          | 3.075          | -5.551    | -5.141    | -3.769    | 2.753    | 3.397    | Gdf10            | 214.295     |
| Gdf10         | 0.001    | 7.867                    | -4.853          | 3.014          | -4.520    | -4.302    | -5.738    | 3.147    | 2.880    | Egln3            | 209.594     |
| Slc5a10       | 0.001    | 7.559                    | -1.420          | 6.139          | -1.058    | -2.063    | -1.139    | 5.531    | 6.748    | Slc5a10          | 195.462     |
| Fgfrl1        | 0.006    | 7.173                    | -2.514          | 4.659          | -1.091    | -2.619    | -3.833    | 4.571    | 4.747    | Ppic             | 121.178     |
| ccdc198       | 0.003    | 7.163                    | -2.260          | 4.903          | -2.940    | -0.972    | -2.869    | 4.953    | 4.852    | ccdc198          | 114.529     |
| 2200002J24Rik | 0.009    | 7.097                    | -1.701          | 5.396          | 0.000     | -2.444    | -2.658    | 5.957    | 4.836    | Ugt1a1           | 109.348     |
| Ppic          | 0.001    | 6.988                    | -3.122          | 3.866          | -3.627    | -3.217    | -2.523    | 3.637    | 4.094    | Fgfrl1           | 107.101     |
| Ugt1a1        | 0.001    | 6.925                    | -3.171          | 3.754          | -3.292    | -3.881    | -2.340    | 3.661    | 3.846    | 2200002J24Rik    | 100.319     |
| Fbxl7         | 0.006    | 6.911                    | -5.196          | 1.715          | -5.260    | -6.435    | -3.893    | 1.299    | 2.131    | Fbxl7            | 96.741      |
| Yap1          | 0.008    | 6.760                    | -4.358          | 2.402          | -3.890    | -5.939    | -3.245    | 2.445    | 2.359    | Antxr2           | 90.414      |
| Antxr2        | 0.001    | 6.597                    | -4.752          | 1.845          | -4.288    | -5.463    | -4.506    | 1.864    | 1.825    | Ajuba            | 83.395      |
| ErbB2         | 0.001    | 6.460                    | -4.487          | 1.973          | -4.935    | -4.788    | -3.738    | 1.958    | 1.988    | Yap1             | 82.832      |
| Mertk         | 0.001    | 6.421                    | -3.337          | 3.084          | -3.085    | -4.037    | -2.888    | 2.857    | 3.311    | Mertk            | 81.070      |
| Prss23        | 0.002    | 6.396                    | -2.184          | 4.211          | -2.592    | -2.735    | -1.226    | 3.920    | 4.502    | ErbB2            | 80.888      |
| Ajuba         | 0.000    | 6.366                    | -4.551          | 1.816          | -4.420    | -4.595    | -4.638    | 1.493    | 2.138    | Gstt3            | 80.370      |
| Gstt3         | 0.000    | 6.366                    | -2.255          | 4.111          | -2.080    | -2.085    | -2.598    | 4.091    | 4.131    | Sorcs2           | 79.288      |
| Gimap9        | 0.005    | 6.316                    | -3.854          | 2.462          | -4.854    | -2.636    | -4.072    | 2.521    | 2.403    | Prss23           | 75.255      |
| Sorcs2        | 0.000    | 6.302                    | -1.202          | 5.100          | -1.106    | -1.544    | -0.955    | 4.732    | 5.467    | Msln             | 73.643      |
| Msln          | 0.001    | 6.279                    | 1.096           | 7.375          | 1.396     | 0.438     | 1.454     | 7.556    | 7.194    | Prkg2            | 72.433      |
| Prkg2         | 0.002    | 6.185                    | -2.554          | 3.631          | -2.756    | -2.983    | -1.923    | 3.119    | 4.142    | Gimap9           | 63.912      |
| Rbm46         | 0.004    | 6.131                    | -3.955          | 2.175          | -3.138    | -5.050    | -3.678    | 1.781    | 2.570    | Dlc1             | 63.578      |
| Neurog3       | 0.008    | 6.097                    | -1.492          | 4.605          | -0.297    | -2.664    | -1.515    | 4.038    | 5.172    | Cybrd1           | 62.790      |
| Pcdhb8        | 0.006    | 6.093                    | -4.680          | 1.413          | -3.354    | -5.529    | -5.158    | 1.509    | 1.318    | Bmpr1b           | 62.639      |
| Rplp0-ps1     | 0.003    | 6.036                    | -3.308          | 2.728          | -3.038    | -2.628    | -4.257    | 2.563    | 2.892    | Rbm46            | 62.366      |
| Cybrd1        | 0.002    | 6.014                    | -2.976          | 3.039          | -3.233    | -3.444    | -2.250    | 2.554    | 3.524    | Gm34225          | 61.472      |
| Gm34225       | 0.004    | 6.003                    | -0.158          | 5.844          | -0.237    | -0.952    | 0.715     | 5.238    | 6.451    | Nptx2            | 59.945      |
| Bmpr1b        | 0.002    | 5.973                    | -2.527          | 3.446          | -2.322    | -3.134    | -2.125    | 2.959    | 3.932    | Rplp0-ps1        | 58.570      |
| Sox6          | 0.001    | 5.950                    | -4.596          | 1.355          | -4.444    | -4.095    | -5.247    | 1.252    | 1.457    | Neurog3          | 58.565      |
| Nptx2         | 0.000    | 5.948                    | 0.973           | 6.920          | 1.233     | 0.630     | 1.056     | 6.820    | 7.021    | Col4a5           | 58.059      |
| Dlc1          | 0.000    | 5.947                    | -2.272          | 3.675          | -2.133    | -2.230    | -2.453    | 3.215    | 4.135    | Sox6             | 57.820      |
| St6galnac2    | 0.002    | 5.885                    | -3.091          | 2.794          | -2.280    | -3.802    | -3.190    | 2.569    | 3.019    | Exd1             | 56.112      |
| Col4a5        | 0.000    | 5.884                    | -4.067          | 1.818          | -4.079    | -4.017    | -4.105    | 1.834    | 1.801    | Chrna7           | 54.815      |
| Exd1          | 0.000    | 5.842                    | -4.344          | 1.498          | -4.733    | -4.153    | -4.144    | 1.265    | 1.731    | Mmp14            | 53.436      |
| Mmp14         | 0.001    | 5.805                    | -2.259          | 3.547          | -2.254    | -2.719    | -1.803    | 3.382    | 3.711    | St6galnac2       | 53.389      |
| Chrna7        | 0.000    | 5.795                    | -3.203          | 2.592          | -3.310    | -3.093    | -3.206    | 2.423    | 2.762    | Pcdhb8           | 53.301      |
| Smad6         | 0.009    | 5.770                    | -3.624          | 2.145          | -3.011    | -2.824    | -5.037    | 2.422    | 1.869    | Pfkfb3           | 52.385      |
| Proser2       | 0.000    | 5.681                    | -3.802          | 1.879          | -3.936    | -4.178    | -3.292    | 1.806    | 1.952    | C230024C17Rik    | 50.417      |
| Pfkfb3        | 0.001    | 5.666                    | -2.270          | 3.396          | -2.057    | -2.647    | -2.105    | 2.863    | 3.929    | Proser2          | 48.626      |
| Plch2         | 0.001    | 5.634                    | -2.911          | 2.723          | -2.252    | -3.426    | -3.055    | 2.817    | 2.629    | Vipr2            | 46.981      |
| Gm12530       | 0.007    | 5.629                    | -3.287          | 2.342          | -2.953    | -4.543    | -2.364    | 2.484    | 2.200    | Smo              | 46.312      |
| Smo           | 0.000    | 5.584                    | -1.397          | 4.188          | -1.137    | -1.760    | -1.293    | 4.093    | 4.282    | Plch2            | 45.895      |
| C230024C17Rik | 0.001    | 5.560                    | -2.082          | 3.478          | -2.177    | -2.145    | -1.925    | 2.860    | 4.096    | Zfp750           | 45.130      |
| Zfp750        | 0.000    | 5.559                    | -2.073          | 3.486          | -1.743    | -2.514    | -1.962    | 3.584    | 3.389    | Smad6            | 44.709      |
| Vipr2         | 0.000    | 5.553                    | -2.264          | 3.290          | -2.296    | -2.301    | -2.193    | 2.985    | 3.595    | Slc2a10          | 42.357      |
| Tmie          | 0.008    | 5.536                    | -3.081          | 2.456          | -2.067    | -4.358    | -2.816    | 2.612    | 2.299    | Gm12530          | 40.733      |
| Slc2a10       | 0.001    | 5.521                    | -2.477          | 3.043          | -1.804    | -2.757    | -2.871    | 2.978    | 3.108    | Fn1              | 40.644      |
| Tcea3         | 0.004    | 5.503                    | -1.989          | 3.514          | -1.039    | -2.892    | -2.035    | 3.520    | 3.509    | Gsta4            | 40.284      |
| Fn1           | 0.006    | 5.490                    | -2.849          | 2.641          | -2.363    | -3.953    | -2.231    | 2.185    | 3.097    | Tcea3            | 38.612      |
| Gsta4         | 0.003    | 5.487                    | -3.220          | 2.267          | -2.479    | -4.069    | -3.112    | 2.506    | 2.029    | Dock1            | 38.572      |

|               |       |       |        |        |        |        |        |        |        |               |        |
|---------------|-------|-------|--------|--------|--------|--------|--------|--------|--------|---------------|--------|
| Gm609         | 0.003 | 5.387 | -1.486 | 3.901  | -0.692 | -2.223 | -1.541 | 3.613  | 4.190  | Gm609         | 37.865 |
| Dock1         | 0.000 | 5.336 | -2.507 | 2.830  | -2.151 | -2.491 | -2.878 | 2.793  | 2.867  | Fzd1          | 37.564 |
| Fzd1          | 0.001 | 5.281 | -2.541 | 2.740  | -2.208 | -2.990 | -2.426 | 2.474  | 3.005  | Tmie          | 37.558 |
| Evc2          | 0.002 | 5.279 | -1.138 | 4.141  | -0.777 | -0.734 | -1.902 | 4.181  | 4.102  | Scn11a        | 36.680 |
| Mycl          | 0.006 | 5.274 | -4.119 | 1.155  | -3.152 | -4.420 | -4.785 | 0.572  | 1.738  | Mycl          | 36.002 |
| Ccdc8         | 0.003 | 5.252 | -1.088 | 4.164  | -0.571 | -0.654 | -2.038 | 4.155  | 4.174  | Evc2          | 35.470 |
| Scn11a        | 0.001 | 5.235 | -3.095 | 2.140  | -2.707 | -2.975 | -3.603 | 1.766  | 2.513  | Cpb2          | 35.347 |
| Cpb2          | 0.000 | 5.209 | 1.018  | 6.227  | 0.772  | 1.388  | 0.893  | 6.192  | 6.261  | Spp1          | 34.412 |
| Ephb4         | 0.000 | 5.139 | -3.175 | 1.964  | -3.183 | -3.358 | -2.986 | 1.888  | 2.039  | Cdhr2         | 34.117 |
| Cdhr2         | 0.000 | 5.137 | 0.382  | 5.518  | 0.445  | 0.548  | 0.152  | 5.378  | 5.659  | Ephb4         | 34.091 |
| Spp1          | 0.000 | 5.126 | 5.249  | 10.374 | 5.114  | 5.254  | 5.378  | 10.642 | 10.107 | Atp4a         | 34.050 |
| Cacna1h       | 0.002 | 5.116 | -2.082 | 3.034  | -1.403 | -2.589 | -2.252 | 2.828  | 3.241  | Ccdc8         | 33.658 |
| Lrrc8e        | 0.003 | 5.112 | -3.366 | 1.745  | -4.186 | -3.316 | -2.597 | 1.636  | 1.855  | Cacna2d2      | 33.646 |
| Nme9          | 0.003 | 5.094 | -3.417 | 1.676  | -3.286 | -2.876 | -4.090 | 1.260  | 2.093  | Mgarp         | 33.616 |
| Areg          | 0.008 | 5.086 | -1.751 | 3.335  | -2.834 | -1.687 | -0.731 | 3.620  | 3.049  | Rnf152        | 33.562 |
| Atp4a         | 0.001 | 5.085 | 0.308  | 5.394  | 0.160  | 0.540  | 0.224  | 5.797  | 4.990  | Nme9          | 32.592 |
| Abo           | 0.000 | 5.069 | -1.583 | 3.487  | -1.272 | -1.500 | -1.976 | 3.522  | 3.451  | Cacna1h       | 31.924 |
| Cacna2d2      | 0.005 | 5.062 | -1.685 | 3.377  | -1.129 | -2.361 | -1.566 | 2.737  | 4.017  | Abo           | 31.918 |
| Lamb1         | 0.000 | 5.056 | -1.303 | 3.753  | -1.145 | -1.698 | -1.067 | 3.841  | 3.665  | Lamb1         | 31.727 |
| Sypl2         | 0.001 | 5.031 | -2.054 | 2.977  | -2.461 | -1.536 | -2.165 | 3.055  | 2.899  | Glpr2         | 31.684 |
| Cped1         | 0.004 | 5.014 | -3.029 | 1.985  | -2.664 | -3.970 | -2.452 | 1.953  | 2.018  | Sypl2         | 30.564 |
| Alox12        | 0.001 | 4.988 | -2.162 | 2.826  | -2.468 | -2.437 | -1.580 | 2.513  | 3.140  | Lrrc8e        | 30.458 |
| Rnf152        | 0.002 | 4.985 | -3.563 | 1.423  | -3.646 | -3.499 | -3.543 | 0.808  | 2.037  | Alox12        | 30.120 |
| Mgarp         | 0.005 | 4.979 | -3.260 | 1.719  | -3.186 | -3.776 | -2.819 | 0.970  | 2.468  | Grin2c        | 30.024 |
| Glpr2         | 0.001 | 4.960 | -1.491 | 3.469  | -1.353 | -1.358 | -1.764 | 3.962  | 2.976  | Ctsh          | 29.409 |
| Grin2c        | 0.000 | 4.940 | 0.719  | 5.659  | 0.814  | 0.674  | 0.668  | 5.438  | 5.880  | Gm10800       | 29.357 |
| Ctsh          | 0.000 | 4.938 | -1.409 | 3.529  | -1.553 | -1.540 | -1.134 | 3.599  | 3.459  | Acsf2         | 28.834 |
| Gm10800       | 0.000 | 4.936 | 0.622  | 5.559  | 0.461  | 0.916  | 0.491  | 5.651  | 5.467  | C130021I20Rik | 28.415 |
| Gm15848       | 0.007 | 4.935 | -3.443 | 1.492  | -2.646 | -3.236 | -4.449 | 1.112  | 1.872  | Gm36543       | 28.402 |
| Gm36543       | 0.002 | 4.932 | 0.532  | 5.464  | 1.067  | 0.679  | -0.151 | 5.758  | 5.170  | Cped1         | 28.386 |
| Nup62cl       | 0.002 | 4.897 | -1.418 | 3.479  | -1.050 | -2.081 | -1.124 | 3.229  | 3.729  | Areg          | 28.302 |
| Etv1          | 0.003 | 4.896 | -0.863 | 4.033  | -0.488 | -1.566 | -0.535 | 3.698  | 4.369  | Mical1        | 28.241 |
| Mical1        | 0.000 | 4.872 | -1.560 | 3.313  | -1.377 | -1.597 | -1.705 | 3.204  | 3.422  | Etv1          | 27.981 |
| Acsf2         | 0.002 | 4.869 | -3.615 | 1.253  | -3.110 | -3.922 | -3.814 | 1.729  | 0.777  | Nup62cl       | 27.821 |
| Gm9625        | 0.000 | 4.855 | 0.134  | 4.989  | 0.513  | 0.093  | -0.203 | 4.833  | 5.146  | Gm9625        | 27.510 |
| C130021I20Rik | 0.001 | 4.839 | 0.133  | 4.973  | 0.382  | 0.068  | -0.049 | 4.588  | 5.358  | Gm15848       | 27.013 |
| Ntng2         | 0.000 | 4.799 | -3.348 | 1.452  | -3.135 | -3.725 | -3.183 | 1.449  | 1.455  | Ntng2         | 26.393 |
| Tmem221       | 0.005 | 4.759 | -2.208 | 2.550  | -1.498 | -3.088 | -2.038 | 2.219  | 2.881  | Gm13453       | 26.050 |
| Gm13453       | 0.000 | 4.756 | 0.000  | 4.756  | 0.000  | 0.000  | 0.000  | 4.679  | 4.832  | Jhy           | 25.310 |
| Glis1         | 0.004 | 4.735 | -3.106 | 1.629  | -2.545 | -4.009 | -2.763 | 1.433  | 1.825  | Tmem221       | 24.226 |
| Slc38a5       | 0.001 | 4.692 | -0.315 | 4.377  | -0.055 | -0.892 | 0.003  | 4.592  | 4.162  | Slc38a5       | 24.176 |
| Mir23a        | 0.003 | 4.690 | -0.338 | 4.353  | -0.401 | -0.991 | 0.380  | 4.067  | 4.639  | Nexmif        | 24.096 |
| Pacsin3       | 0.002 | 4.685 | -1.927 | 2.758  | -1.930 | -1.287 | -2.563 | 2.781  | 2.735  | Ace2          | 23.828 |
| Nexmif        | 0.001 | 4.681 | -1.829 | 2.852  | -1.644 | -1.514 | -2.330 | 2.682  | 3.022  | Glis1         | 23.600 |
| Jhy           | 0.005 | 4.661 | -3.375 | 1.286  | -3.880 | -3.469 | -2.776 | 0.666  | 1.906  | Ism1          | 23.586 |
| Ace2          | 0.000 | 4.641 | 1.004  | 5.646  | 1.334  | 0.709  | 0.970  | 5.857  | 5.435  | Mir23a        | 23.402 |
| Ism1          | 0.000 | 4.637 | -2.738 | 1.900  | -3.122 | -2.489 | -2.603 | 1.751  | 2.048  | Pacsin3       | 23.119 |
| Ndufs5-ps     | 0.000 | 4.584 | 0.617  | 5.201  | 0.832  | 0.727  | 0.292  | 5.056  | 5.346  | Ndufs5-ps     | 22.799 |
| Cd9           | 0.001 | 4.551 | -1.255 | 3.295  | -1.469 | -0.715 | -1.581 | 3.226  | 3.364  | Tspan12       | 22.457 |
| Tspan12       | 0.002 | 4.514 | -1.240 | 3.274  | -0.778 | -1.501 | -1.440 | 2.799  | 3.749  | Ceacam12      | 21.701 |
| Dcdc2a        | 0.000 | 4.497 | 0.029  | 4.526  | 0.151  | -0.279 | 0.215  | 4.287  | 4.764  | Dcdc2a        | 21.633 |
| Ceacam12      | 0.001 | 4.488 | -2.881 | 1.607  | -2.945 | -3.120 | -2.579 | 1.291  | 1.923  | Cd9           | 21.604 |
| Ifnlr1        | 0.000 | 4.478 | -2.427 | 2.052  | -2.618 | -2.149 | -2.514 | 2.183  | 1.920  | Ifnlr1        | 21.163 |
| Dhrs3         | 0.004 | 4.475 | -1.502 | 2.973  | -1.164 | -2.190 | -1.151 | 2.570  | 3.376  | Dhrs3         | 20.950 |
| Asb11         | 0.001 | 4.459 | 0.427  | 4.886  | -0.033 | 0.705  | 0.610  | 5.066  | 4.706  | Asb11         | 20.631 |
| Edn3          | 0.005 | 4.438 | -3.136 | 1.302  | -2.857 | -3.961 | -2.590 | 0.977  | 1.626  | Ccdc141       | 20.347 |
| Lama3         | 0.001 | 4.434 | -2.324 | 2.110  | -2.809 | -1.964 | -2.197 | 2.273  | 1.947  | Lama3         | 20.129 |
| 5330439B14Rik | 0.001 | 4.420 | -1.401 | 3.019  | -1.294 | -1.884 | -1.027 | 2.986  | 3.052  | Foxl3         | 19.812 |
| Ccdc141       | 0.000 | 4.419 | 1.222  | 5.641  | 1.082  | 1.289  | 1.295  | 5.661  | 5.621  | 5330439B14Rik | 19.794 |
| Foxl3         | 0.001 | 4.408 | 1.560  | 5.968  | 1.339  | 1.350  | 1.990  | 5.853  | 6.083  | Edn3          | 19.587 |
| Galnt9        | 0.004 | 4.396 | 0.331  | 4.728  | 0.649  | 0.864  | -0.518 | 4.763  | 4.692  | Tmem41b-ps    | 19.456 |
| Tmem41b-ps    | 0.001 | 4.381 | -1.216 | 3.165  | -0.939 | -1.722 | -0.988 | 2.959  | 3.371  | Spink13       | 18.842 |
| Col19a1       | 0.009 | 4.357 | -1.784 | 2.573  | -1.793 | -2.705 | -0.855 | 2.318  | 2.827  | Galnt9        | 18.460 |
| Fbp2          | 0.002 | 4.323 | -0.125 | 4.199  | 0.477  | -0.639 | -0.211 | 4.386  | 4.011  | Fbp2          | 18.175 |
| Spink13       | 0.002 | 4.305 | 0.597  | 4.902  | 0.075  | 0.822  | 0.894  | 5.285  | 4.519  | Niban1        | 17.840 |
| E230016K23Rik | 0.007 | 4.301 | -1.290 | 3.011  | -1.545 | -1.900 | -0.424 | 2.608  | 3.414  | E230016K23Rik | 17.535 |

|           |       |       |        |       |        |        |        |       |       |           |        |
|-----------|-------|-------|--------|-------|--------|--------|--------|-------|-------|-----------|--------|
| Niban1    | 0.000 | 4.241 | -0.046 | 4.195 | -0.267 | 0.003  | 0.126  | 4.092 | 4.298 | Dpyd      | 17.266 |
| Fas       | 0.003 | 4.199 | -2.214 | 1.985 | -2.861 | -2.187 | -1.593 | 2.010 | 1.960 | Col19a1   | 17.220 |
| Dpyd      | 0.000 | 4.191 | -2.958 | 1.232 | -2.766 | -3.125 | -2.984 | 1.383 | 1.081 | Metrn     | 17.163 |
| Srgn      | 0.002 | 4.188 | -1.007 | 3.181 | -1.366 | -1.163 | -0.492 | 2.895 | 3.468 | Lmx1b     | 17.041 |
| Metrn     | 0.000 | 4.188 | -0.566 | 3.622 | -0.499 | -0.810 | -0.389 | 3.490 | 3.753 | Pigr      | 16.963 |
| Lmx1b     | 0.000 | 4.174 | 0.292  | 4.466 | 0.524  | 0.204  | 0.148  | 4.310 | 4.623 | Srgn      | 16.955 |
| Pigr      | 0.002 | 4.159 | 0.088  | 4.246 | 0.228  | -0.380 | 0.416  | 4.614 | 3.878 | Dlk1      | 16.863 |
| Tmem151b  | 0.002 | 4.151 | -1.428 | 2.723 | -1.021 | -1.275 | -1.988 | 2.420 | 3.026 | Hcar1     | 16.505 |
| Cavin1    | 0.000 | 4.120 | -0.238 | 3.882 | -0.123 | -0.323 | -0.269 | 3.819 | 3.945 | Tmem151b  | 16.480 |
| Rhou      | 0.002 | 4.119 | 0.186  | 4.305 | -0.136 | -0.087 | 0.781  | 4.350 | 4.260 | Cavin1    | 16.377 |
| Gm37194   | 0.001 | 4.104 | -1.649 | 2.456 | -1.568 | -1.421 | -1.957 | 2.663 | 2.248 | Fas       | 16.254 |
| Galnt4    | 0.000 | 4.092 | 1.824  | 5.916 | 1.940  | 1.919  | 1.613  | 5.815 | 6.017 | Gm37194   | 16.173 |
| Kcnj4     | 0.003 | 4.081 | -1.122 | 2.959 | -1.437 | -1.375 | -0.556 | 2.562 | 3.356 | Galnt4    | 16.006 |
| Homer3    | 0.001 | 4.067 | -1.661 | 2.406 | -1.336 | -1.756 | -1.891 | 2.172 | 2.640 | Kcnj4     | 15.872 |
| Mgst1     | 0.002 | 4.056 | 1.044  | 5.101 | 1.245  | 1.422  | 0.467  | 4.861 | 5.341 | Homer3    | 15.745 |
| Gm648     | 0.006 | 4.053 | -1.408 | 2.645 | -1.195 | -2.200 | -0.828 | 2.332 | 2.958 | Rhou      | 15.622 |
| Tmed6     | 0.000 | 4.024 | 3.466  | 7.490 | 3.545  | 3.661  | 3.191  | 7.362 | 7.617 | Bmp3      | 15.281 |
| Dlk1      | 0.008 | 4.024 | -0.324 | 3.700 | 0.182  | -0.689 | -0.464 | 4.444 | 2.955 | Mgst1     | 15.229 |
| S100a6    | 0.002 | 3.988 | 1.254  | 5.242 | 1.600  | 0.821  | 1.342  | 5.521 | 4.964 | Tmed6     | 15.180 |
| Bmp3      | 0.006 | 3.976 | -1.053 | 2.923 | -0.651 | -1.638 | -0.869 | 2.360 | 3.487 | Elovl7    | 15.118 |
| Cd24a     | 0.001 | 3.964 | 2.640  | 6.604 | 3.026  | 2.152  | 2.743  | 6.720 | 6.488 | Gm648     | 14.774 |
| Car11     | 0.001 | 3.962 | -0.153 | 3.809 | 0.201  | -0.059 | -0.602 | 3.653 | 3.964 | S100a6    | 14.773 |
| Hcar1     | 0.005 | 3.961 | -1.508 | 2.453 | -1.606 | -1.490 | -1.429 | 1.738 | 3.168 | Car11     | 14.273 |
| Slc15a1   | 0.007 | 3.958 | -2.401 | 1.556 | -1.619 | -3.110 | -2.475 | 1.246 | 1.866 | Cd24a     | 14.183 |
| Rab29     | 0.002 | 3.956 | -0.684 | 3.272 | -0.444 | -1.282 | -0.326 | 3.191 | 3.354 | Malrd1    | 14.139 |
| Elovl7    | 0.002 | 3.928 | 0.140  | 4.068 | 0.124  | 0.150  | 0.146  | 4.560 | 3.577 | Rab29     | 13.932 |
| C1rl      | 0.002 | 3.917 | -0.610 | 3.307 | -1.143 | -0.231 | -0.455 | 3.260 | 3.354 | Anpep     | 13.911 |
| Gm44613   | 0.009 | 3.915 | -2.639 | 1.277 | -1.703 | -3.293 | -2.921 | 1.055 | 1.498 | Mr1       | 13.655 |
| Malrd1    | 0.000 | 3.913 | -0.450 | 3.463 | -0.306 | -0.550 | -0.494 | 3.641 | 3.285 | Mob3b     | 13.618 |
| Slc5a5    | 0.002 | 3.909 | -1.999 | 1.910 | -2.518 | -2.030 | -1.447 | 1.848 | 1.972 | C1rl      | 13.601 |
| Hpse      | 0.003 | 3.907 | -0.077 | 3.829 | 0.070  | 0.377  | -0.679 | 3.970 | 3.689 | Gm43305   | 13.541 |
| Anpep     | 0.000 | 3.901 | 2.173  | 6.074 | 2.333  | 2.190  | 1.996  | 5.969 | 6.179 | Slc15a1   | 13.533 |
| Mob3b     | 0.001 | 3.893 | 0.024  | 3.917 | 0.263  | -0.372 | 0.181  | 3.819 | 4.014 | Itprp     | 13.479 |
| Itprp     | 0.002 | 3.891 | -0.324 | 3.567 | -0.835 | 0.031  | -0.169 | 3.738 | 3.395 | Slc29a4   | 13.447 |
| Slc29a4   | 0.001 | 3.888 | 1.924  | 5.812 | 2.356  | 1.815  | 1.602  | 5.760 | 5.864 | Tmem98    | 13.437 |
| Gm5206    | 0.002 | 3.885 | 0.291  | 4.176 | 0.016  | 0.867  | -0.009 | 4.314 | 4.039 | Hpse      | 13.413 |
| Mr1       | 0.000 | 3.881 | 0.158  | 4.039 | 0.315  | 0.215  | -0.054 | 3.985 | 4.092 | Slc5a5    | 13.357 |
| Igdcc4    | 0.002 | 3.867 | -1.358 | 2.509 | -1.602 | -1.651 | -0.820 | 2.693 | 2.326 | Hes1      | 13.344 |
| Tmem98    | 0.000 | 3.862 | 1.380  | 5.242 | 1.283  | 1.208  | 1.650  | 5.147 | 5.337 | Large1    | 13.337 |
| Gm43305   | 0.000 | 3.858 | -2.574 | 1.285 | -2.657 | -2.469 | -2.595 | 1.156 | 1.414 | Tgif1     | 13.274 |
| Gm24661   | 0.003 | 3.855 | -0.655 | 3.200 | -0.873 | 0.000  | -1.091 | 3.232 | 3.167 | Gm5206    | 13.233 |
| Tnfrsf10b | 0.003 | 3.845 | -2.548 | 1.297 | -2.126 | -3.175 | -2.344 | 1.393 | 1.201 | Gm15540   | 13.208 |
| Hes1      | 0.000 | 3.832 | 1.900  | 5.732 | 2.064  | 1.761  | 1.874  | 5.944 | 5.520 | Igdcc4    | 13.185 |
| Large1    | 0.000 | 3.831 | -1.286 | 2.545 | -1.157 | -1.457 | -1.244 | 2.326 | 2.763 | Prdm1     | 12.883 |
| Tgif1     | 0.000 | 3.825 | -0.644 | 3.181 | -0.748 | -0.728 | -0.456 | 3.399 | 2.963 | Ntn4      | 12.846 |
| Prdm1     | 0.001 | 3.817 | -1.082 | 2.735 | -0.736 | -1.480 | -1.029 | 2.568 | 2.903 | Tnfrsf10b | 12.759 |
| Pdgfb     | 0.002 | 3.816 | -2.401 | 1.416 | -2.610 | -1.878 | -2.713 | 1.293 | 1.539 | Ptprk     | 12.734 |
| Mir27a    | 0.003 | 3.809 | 0.573  | 4.382 | 0.969  | 0.000  | 0.751  | 4.142 | 4.623 | Gm24661   | 12.682 |
| Ptprk     | 0.000 | 3.794 | -0.193 | 3.602 | -0.120 | 0.035  | -0.493 | 3.526 | 3.677 | Mir27a    | 12.670 |
| Ntn4      | 0.002 | 3.783 | -1.331 | 2.452 | -0.913 | -1.678 | -1.402 | 2.095 | 2.809 | Pdgfb     | 12.657 |
| Baiap2l2  | 0.001 | 3.770 | -1.911 | 1.859 | -2.001 | -2.176 | -1.557 | 1.789 | 1.929 | Mir8116   | 12.635 |
| Mir8116   | 0.000 | 3.766 | 0.076  | 3.842 | 0.227  | 0.000  | 0.000  | 3.695 | 3.988 | Gm44613   | 12.586 |
| Gatm      | 0.000 | 3.718 | 4.590  | 8.308 | 4.628  | 4.432  | 4.710  | 8.143 | 8.472 | Plat      | 12.458 |
| Prkd3     | 0.000 | 3.710 | -1.220 | 2.490 | -1.061 | -1.396 | -1.204 | 2.370 | 2.610 | Baiap2l2  | 12.434 |
| Gh        | 0.000 | 3.709 | 3.027  | 6.736 | 2.934  | 2.986  | 3.161  | 6.634 | 6.838 | Cd83      | 12.347 |
| Kcnk3     | 0.002 | 3.703 | -2.235 | 1.468 | -1.808 | -2.720 | -2.178 | 1.338 | 1.598 | Kyat3     | 12.237 |
| Plat      | 0.002 | 3.689 | 0.141  | 3.830 | 0.197  | 0.237  | -0.010 | 4.269 | 3.392 | Gatm      | 12.200 |
| Gm15540   | 0.006 | 3.689 | -2.310 | 1.378 | -2.569 | -2.159 | -2.203 | 2.051 | 0.706 | Gh        | 12.078 |
| Gm50390   | 0.000 | 3.659 | 0.000  | 3.659 | 0.000  | 0.000  | 0.000  | 3.700 | 3.618 | Prkd3     | 12.077 |
| Dnah9     | 0.000 | 3.641 | 0.151  | 3.792 | 0.147  | 0.115  | 0.191  | 3.566 | 4.018 | Tcim      | 11.761 |
| Lrp5      | 0.000 | 3.637 | 1.378  | 5.015 | 1.506  | 1.308  | 1.320  | 5.072 | 4.958 | Kcnk3     | 11.658 |
| Tcim      | 0.001 | 3.635 | 2.933  | 6.568 | 2.952  | 2.746  | 3.100  | 6.932 | 6.204 | Gm50390   | 11.635 |
| Irx2      | 0.000 | 3.632 | -2.000 | 1.632 | -1.946 | -1.983 | -2.071 | 1.564 | 1.700 | Dnah9     | 11.624 |
| Serpina7  | 0.001 | 3.623 | 2.344  | 5.967 | 2.132  | 2.160  | 2.740  | 6.159 | 5.775 | Rspo4     | 11.573 |
| Cd83      | 0.007 | 3.616 | -0.701 | 2.915 | -0.547 | -1.047 | -0.510 | 2.264 | 3.566 | Lrp5      | 11.426 |
| Litaf     | 0.000 | 3.615 | 0.641  | 4.256 | 0.675  | 0.640  | 0.608  | 4.346 | 4.165 | Irx2      | 11.406 |

|               |       |       |        |        |        |        |        |        |        |               |        |
|---------------|-------|-------|--------|--------|--------|--------|--------|--------|--------|---------------|--------|
| Rspo4         | 0.003 | 3.611 | 3.285  | 6.896  | 3.394  | 2.948  | 3.514  | 6.472  | 7.320  | Gm11789       | 11.324 |
| Kyat3         | 0.004 | 3.607 | 0.375  | 3.983  | 0.463  | 0.288  | 0.376  | 4.582  | 3.383  | Litaf         | 11.271 |
| Ppy           | 0.000 | 3.599 | 8.396  | 11.995 | 8.351  | 8.501  | 8.335  | 12.224 | 11.765 | Ppy           | 11.255 |
| Gm20305       | 0.004 | 3.579 | 0.026  | 3.605  | -0.640 | 0.577  | 0.141  | 3.612  | 3.598  | Serpina7      | 11.188 |
| Gm11789       | 0.001 | 3.577 | 1.143  | 4.720  | 1.095  | 1.131  | 1.204  | 4.350  | 5.091  | Renbp         | 10.697 |
| Pyy           | 0.001 | 3.548 | 6.969  | 10.517 | 7.164  | 6.604  | 7.139  | 10.484 | 10.549 | Lrat          | 10.681 |
| Lrat          | 0.000 | 3.542 | 0.000  | 3.542  | 0.000  | 0.000  | 0.000  | 3.432  | 3.652  | Arrdc4        | 10.627 |
| Renbp         | 0.001 | 3.536 | -1.311 | 2.226  | -1.287 | -1.140 | -1.505 | 2.463  | 1.988  | Pyy           | 10.519 |
| Zfp36l1       | 0.000 | 3.523 | -0.306 | 3.217  | -0.509 | -0.331 | -0.079 | 3.202  | 3.232  | Odad4         | 10.488 |
| Gm266         | 0.001 | 3.509 | -0.679 | 2.830  | -0.960 | -0.761 | -0.316 | 3.008  | 2.653  | Zfp36l1       | 10.410 |
| Plin3         | 0.000 | 3.503 | 1.617  | 5.120  | 1.722  | 1.748  | 1.381  | 5.228  | 5.012  | Plin3         | 10.296 |
| Gdf11         | 0.001 | 3.496 | -0.005 | 3.491  | 0.249  | -0.259 | -0.004 | 3.295  | 3.687  | Gm20305       | 10.280 |
| Gm25430       | 0.007 | 3.495 | -2.089 | 1.407  | -2.348 | -1.353 | -2.566 | 1.120  | 1.693  | Gm266         | 10.271 |
| Odad4         | 0.002 | 3.482 | -0.211 | 3.271  | 0.010  | -0.158 | -0.485 | 2.871  | 3.671  | Gdf11         | 10.268 |
| Cald1         | 0.001 | 3.481 | 2.241  | 5.722  | 2.199  | 1.969  | 2.553  | 5.770  | 5.673  | Shisa4        | 10.044 |
| 9230116L04Rik | 0.001 | 3.480 | -2.073 | 1.407  | -1.693 | -2.157 | -2.370 | 1.413  | 1.401  | Cald1         | 10.015 |
| Arrdc4        | 0.002 | 3.479 | 1.999  | 5.477  | 1.924  | 2.185  | 1.887  | 5.034  | 5.921  | 9230116L04Rik | 9.943  |
| Arg2          | 0.004 | 3.468 | -1.261 | 2.207  | -1.845 | -1.155 | -0.783 | 2.427  | 1.987  | Agpat4        | 9.932  |
| Shisa4        | 0.000 | 3.463 | -1.234 | 2.230  | -1.090 | -1.302 | -1.309 | 2.105  | 2.355  | Akna          | 9.887  |
| Agpat4        | 0.000 | 3.446 | -0.067 | 3.379  | 0.043  | -0.208 | -0.035 | 3.222  | 3.536  | Tmem40        | 9.787  |
| Cldn4         | 0.002 | 3.441 | 2.598  | 6.039  | 2.920  | 2.179  | 2.695  | 5.847  | 6.231  | Ccdc125       | 9.769  |
| Ccdc125       | 0.002 | 3.440 | -1.564 | 1.875  | -1.983 | -1.509 | -1.201 | 1.611  | 2.140  | Ush1g         | 9.720  |
| Gm12328       | 0.001 | 3.439 | -1.731 | 1.708  | -1.795 | -1.385 | -2.013 | 1.673  | 1.743  | Cldn4         | 9.715  |
| Ush1g         | 0.001 | 3.415 | -1.821 | 1.594  | -1.957 | -1.595 | -1.912 | 1.377  | 1.811  | Gm25430       | 9.715  |
| Akna          | 0.001 | 3.410 | -1.736 | 1.674  | -1.666 | -1.701 | -1.840 | 1.347  | 2.002  | Arg2          | 9.710  |
| Mapk4         | 0.002 | 3.399 | 1.443  | 4.842  | 1.500  | 0.994  | 1.836  | 4.880  | 4.804  | Gm12328       | 9.671  |
| Runx1         | 0.001 | 3.386 | -1.885 | 1.501  | -1.945 | -2.087 | -1.623 | 1.343  | 1.659  | Runx1         | 9.423  |
| Hyal1         | 0.001 | 3.370 | -0.274 | 3.097  | -0.532 | 0.055  | -0.343 | 2.872  | 3.322  | Sox4          | 9.370  |
| Mill2         | 0.000 | 3.367 | -0.583 | 2.785  | -0.651 | -0.389 | -0.708 | 2.873  | 2.696  | Bcar3         | 9.328  |
| Tmem40        | 0.002 | 3.363 | 0.199  | 3.561  | 0.121  | 0.174  | 0.301  | 3.106  | 4.016  | Hyal1         | 9.314  |
| Bcar3         | 0.005 | 3.362 | -2.292 | 1.070  | -1.767 | -2.514 | -2.595 | 0.662  | 1.478  | Mill2         | 9.291  |
| Fxyd6         | 0.009 | 3.362 | 2.398  | 5.760  | 2.876  | 1.651  | 2.666  | 5.382  | 6.137  | Ambp          | 9.284  |
| Gpc6          | 0.001 | 3.357 | -1.584 | 1.773  | -1.150 | -1.920 | -1.683 | 1.714  | 1.831  | Mapk4         | 9.259  |
| Sox4          | 0.000 | 3.356 | 2.941  | 6.297  | 3.055  | 2.899  | 2.868  | 6.054  | 6.540  | Klk1b22       | 9.209  |
| Cracr2b       | 0.001 | 3.350 | -2.019 | 1.332  | -2.020 | -1.672 | -2.364 | 1.293  | 1.370  | A530001N23Rik | 9.161  |
| Klk1b22       | 0.000 | 3.349 | 0.000  | 3.349  | 0.000  | 0.000  | 0.000  | 3.256  | 3.442  | Th            | 9.113  |
| Ambp          | 0.001 | 3.345 | 3.534  | 6.878  | 3.793  | 3.460  | 3.348  | 6.582  | 7.175  | Cracr2b       | 9.008  |
| Gcnt4         | 0.001 | 3.340 | -0.764 | 2.576  | -0.419 | -1.168 | -0.704 | 2.610  | 2.542  | Gpc6          | 8.997  |
| Th            | 0.000 | 3.339 | 4.118  | 7.457  | 4.088  | 4.175  | 4.092  | 7.449  | 7.465  | Fxyd6         | 8.990  |
| Rhbdf1        | 0.006 | 3.333 | -0.603 | 2.730  | -0.026 | -1.287 | -0.495 | 2.649  | 2.812  | Mroh2a        | 8.939  |
| Sult1c2       | 0.001 | 3.332 | 1.190  | 4.522  | 1.086  | 1.616  | 0.867  | 4.530  | 4.513  | Gcnt4         | 8.905  |
| A530001N23Rik | 0.002 | 3.324 | -1.470 | 1.854  | -1.195 | -1.648 | -1.566 | 1.536  | 2.173  | Sult1c2       | 8.828  |
| Celsr1        | 0.001 | 3.310 | 1.545  | 4.856  | 1.246  | 1.938  | 1.452  | 4.953  | 4.758  | Agt           | 8.782  |
| Mapk13        | 0.001 | 3.303 | 0.203  | 3.506  | 0.581  | -0.026 | 0.054  | 3.378  | 3.635  | Celsr1        | 8.738  |
| Agt           | 0.002 | 3.301 | 3.996  | 7.297  | 3.861  | 4.375  | 3.752  | 7.507  | 7.088  | Mapk13        | 8.734  |
| Ccn1          | 0.003 | 3.299 | 1.701  | 5.000  | 2.096  | 1.177  | 1.829  | 5.174  | 4.826  | Rgs16         | 8.696  |
| Tox           | 0.006 | 3.296 | -1.187 | 2.109  | -1.022 | -1.823 | -0.715 | 1.887  | 2.332  | Sv2c          | 8.660  |
| Mroh2a        | 0.001 | 3.292 | 1.067  | 4.359  | 1.028  | 0.960  | 1.212  | 4.091  | 4.627  | Ccn1          | 8.585  |
| Sv2c          | 0.000 | 3.270 | -1.328 | 1.942  | -1.308 | -1.212 | -1.465 | 1.818  | 2.066  | Msi1          | 8.549  |
| Rbp4          | 0.001 | 3.268 | 4.639  | 7.906  | 4.956  | 4.295  | 4.665  | 7.819  | 7.994  | 3010003L21Rik | 8.508  |
| Msi1          | 0.001 | 3.263 | 0.254  | 3.517  | 0.525  | 0.075  | 0.162  | 3.385  | 3.649  | Rhbdf1        | 8.486  |
| Cd44          | 0.001 | 3.258 | 1.998  | 5.256  | 2.129  | 1.601  | 2.264  | 5.152  | 5.361  | Rbp4          | 8.483  |
| Mmp15         | 0.000 | 3.257 | -0.380 | 2.877  | -0.505 | -0.546 | -0.088 | 2.815  | 2.939  | Mmp15         | 8.465  |
| F2            | 0.004 | 3.250 | -1.096 | 2.155  | -0.583 | -1.606 | -1.097 | 2.382  | 1.928  | Tox           | 8.461  |
| Serping1      | 0.001 | 3.235 | 2.997  | 6.232  | 3.041  | 2.698  | 3.253  | 6.256  | 6.208  | Cd44          | 8.412  |
| Evc           | 0.003 | 3.230 | -0.031 | 3.199  | -0.153 | 0.516  | -0.456 | 3.193  | 3.205  | Als2cl        | 8.373  |
| Bach2         | 0.008 | 3.226 | -1.793 | 1.433  | -2.452 | -1.649 | -1.278 | 1.132  | 1.735  | Dct           | 8.309  |
| Als2cl        | 0.003 | 3.226 | -1.898 | 1.327  | -2.171 | -2.037 | -1.487 | 1.642  | 1.013  | Serping1      | 8.303  |
| Rgs16         | 0.003 | 3.223 | 3.882  | 7.105  | 4.051  | 3.691  | 3.903  | 6.682  | 7.529  | Gm50250       | 8.247  |
| Gm50250       | 0.000 | 3.221 | 4.366  | 7.588  | 4.110  | 4.380  | 4.609  | 7.662  | 7.514  | F2            | 8.243  |
| 3010003L21Rik | 0.001 | 3.221 | 0.072  | 3.293  | 0.057  | 0.111  | 0.048  | 3.006  | 3.580  | Bmf           | 8.224  |
| Dct           | 0.000 | 3.216 | 0.709  | 3.925  | 0.660  | 0.643  | 0.825  | 4.046  | 3.804  | Cldn2         | 8.181  |
| Bmf           | 0.000 | 3.211 | -0.372 | 2.839  | -0.322 | -0.552 | -0.242 | 2.814  | 2.864  | Gm25911       | 8.173  |
| Cldn2         | 0.000 | 3.209 | 0.573  | 3.782  | 0.468  | 0.433  | 0.817  | 3.768  | 3.796  | Notch2        | 8.163  |
| Gm48342       | 0.001 | 3.207 | -1.561 | 1.646  | -1.742 | -1.747 | -1.195 | 1.774  | 1.519  | Gm42937       | 8.156  |
| Asic2         | 0.002 | 3.202 | -1.624 | 1.579  | -1.186 | -1.821 | -1.864 | 1.510  | 1.647  | Gm48342       | 8.117  |

|              |       |       |        |        |        |        |        |        |        |              |       |
|--------------|-------|-------|--------|--------|--------|--------|--------|--------|--------|--------------|-------|
| Gm25911      | 0.000 | 3.200 | -0.066 | 3.134  | 0.000  | 0.000  | -0.198 | 3.125  | 3.143  | Grid2ip      | 8.078 |
| Notch2       | 0.000 | 3.196 | -0.918 | 2.277  | -0.969 | -0.999 | -0.787 | 2.186  | 2.369  | Bach2        | 8.059 |
| Gm42937      | 0.001 | 3.185 | 3.285  | 6.471  | 3.360  | 3.092  | 3.403  | 6.685  | 6.257  | Uox          | 8.011 |
| Gm35409      | 0.007 | 3.184 | -1.676 | 1.508  | -2.279 | -1.061 | -1.690 | 1.341  | 1.675  | Evc          | 8.008 |
| Phlda3       | 0.001 | 3.183 | -0.141 | 3.042  | -0.256 | 0.246  | -0.412 | 3.148  | 2.936  | Asic2        | 7.996 |
| Grid2ip      | 0.002 | 3.181 | -1.491 | 1.690  | -1.811 | -1.131 | -1.532 | 1.400  | 1.980  | Hopxos       | 7.995 |
| Ttc16        | 0.001 | 3.172 | -0.954 | 2.218  | -0.547 | -1.214 | -1.101 | 2.256  | 2.181  | Shroom1      | 7.964 |
| Shroom1      | 0.001 | 3.172 | -0.485 | 2.687  | -0.386 | -0.760 | -0.310 | 2.565  | 2.808  | Phlda3       | 7.929 |
| Gm20400      | 0.006 | 3.166 | -0.302 | 2.863  | -0.228 | -0.818 | 0.139  | 2.503  | 3.223  | Gm20400      | 7.927 |
| Nptx1        | 0.003 | 3.158 | 0.088  | 3.246  | 0.311  | -0.425 | 0.379  | 3.076  | 3.417  | Fhl2         | 7.902 |
| Myorg        | 0.001 | 3.152 | 1.211  | 4.364  | 1.063  | 1.539  | 1.032  | 4.170  | 4.558  | Sh3bgrl2     | 7.889 |
| Sh3bgrl2     | 0.004 | 3.145 | -1.811 | 1.333  | -1.413 | -2.180 | -1.840 | 0.985  | 1.682  | Gm11665      | 7.863 |
| Gm44717      | 0.003 | 3.144 | 0.439  | 3.583  | -0.026 | 0.586  | 0.756  | 3.410  | 3.755  | Myorg        | 7.853 |
| Uox          | 0.003 | 3.143 | -1.798 | 1.345  | -1.655 | -2.145 | -1.593 | 0.965  | 1.724  | Dbn1         | 7.841 |
| Gm11665      | 0.000 | 3.142 | 0.000  | 3.142  | 0.000  | 0.000  | 0.000  | 3.015  | 3.269  | Mir6999      | 7.836 |
| Mir6999      | 0.000 | 3.142 | -0.034 | 3.107  | -0.103 | 0.000  | 0.000  | 3.195  | 3.020  | Nkx6-2       | 7.835 |
| Rab11fip4    | 0.000 | 3.139 | -1.207 | 1.932  | -1.363 | -1.251 | -1.006 | 1.938  | 1.926  | Ttc16        | 7.830 |
| Spata13      | 0.002 | 3.138 | 0.945  | 4.084  | 1.413  | 0.775  | 0.647  | 4.060  | 4.107  | Peg10        | 7.791 |
| <b>Hspb8</b> | 0.000 | 3.136 | 2.882  | 6.018  | 2.737  | 3.070  | 2.840  | 6.133  | 5.903  | <b>Hspb8</b> | 7.776 |
| Fhl2         | 0.001 | 3.133 | 0.070  | 3.203  | 0.067  | -0.037 | 0.179  | 3.465  | 2.941  | Rab11fip4    | 7.760 |
| Alpk1        | 0.000 | 3.130 | -1.205 | 1.925  | -1.163 | -1.338 | -1.114 | 1.923  | 1.927  | Alpk1        | 7.735 |
| Rtkn         | 0.000 | 3.112 | -1.159 | 1.952  | -1.062 | -1.094 | -1.321 | 1.745  | 2.160  | Nptx1        | 7.725 |
| Hopxos       | 0.006 | 3.110 | 1.262  | 4.371  | 1.238  | 0.949  | 1.598  | 4.868  | 3.874  | Ube2l6       | 7.725 |
| Ache         | 0.003 | 3.099 | 0.106  | 3.205  | 0.607  | -0.279 | -0.011 | 3.141  | 3.269  | Rtkn         | 7.706 |
| Plin2        | 0.000 | 3.098 | 2.479  | 5.577  | 2.500  | 2.563  | 2.374  | 5.527  | 5.626  | Gm44717      | 7.676 |
| Vav3         | 0.003 | 3.093 | -1.466 | 1.626  | -1.555 | -1.855 | -0.989 | 1.462  | 1.791  | Gm35409      | 7.629 |
| Tnfaip8      | 0.001 | 3.085 | -0.854 | 2.230  | -0.518 | -1.074 | -0.970 | 2.430  | 2.031  | Spata13      | 7.563 |
| Nkx6-2       | 0.004 | 3.084 | 1.151  | 4.235  | 1.216  | 0.895  | 1.341  | 3.779  | 4.691  | Plin2        | 7.553 |
| Dbn1         | 0.004 | 3.081 | 1.458  | 4.540  | 1.501  | 1.195  | 1.678  | 4.066  | 5.013  | Tnfaip8      | 7.442 |
| Rcn3         | 0.009 | 3.078 | -1.063 | 2.014  | -1.333 | -1.421 | -0.436 | 1.628  | 2.401  | Rcn3         | 7.320 |
| Krtap13-1    | 0.003 | 3.077 | 2.279  | 5.356  | 1.862  | 2.709  | 2.268  | 5.219  | 5.494  | Vav3         | 7.318 |
| Gm4356       | 0.001 | 3.067 | 0.174  | 3.240  | -0.122 | 0.136  | 0.507  | 3.313  | 3.167  | Ache         | 7.292 |
| Peg10        | 0.010 | 3.051 | -0.291 | 2.760  | -0.043 | -0.724 | -0.105 | 3.347  | 2.173  | Man2a1       | 7.267 |
| Man2a1       | 0.000 | 3.048 | 3.772  | 6.820  | 3.695  | 3.842  | 3.779  | 6.795  | 6.845  | Shf          | 7.255 |
| <b>Hspb1</b> | 0.000 | 3.048 | 3.629  | 6.677  | 3.618  | 3.504  | 3.764  | 6.689  | 6.665  | Gm4356       | 7.254 |
| Samd13       | 0.002 | 3.037 | -0.591 | 2.447  | -0.654 | -0.294 | -0.823 | 2.204  | 2.689  | <b>Hspb1</b> | 7.250 |
| Shf          | 0.002 | 3.026 | -0.043 | 2.983  | 0.049  | -0.318 | 0.139  | 2.676  | 3.289  | Fgfr4        | 7.244 |
| Fgfr4        | 0.001 | 3.020 | -0.859 | 2.161  | -0.834 | -0.772 | -0.972 | 1.890  | 2.433  | Krtap13-1    | 7.237 |
| Ttr          | 0.001 | 3.019 | 6.775  | 9.795  | 6.924  | 6.525  | 6.876  | 9.640  | 9.950  | Samd13       | 7.227 |
| Ube2l6       | 0.006 | 3.013 | 0.123  | 3.136  | 0.074  | 0.157  | 0.138  | 3.713  | 2.559  | Gm20186      | 7.190 |
| Gm10503      | 0.000 | 3.012 | 2.263  | 5.275  | 2.128  | 2.131  | 2.530  | 5.249  | 5.302  | Npas3        | 7.137 |
| Npas3        | 0.001 | 3.003 | -1.495 | 1.509  | -1.597 | -1.347 | -1.540 | 1.780  | 1.238  | Ttr          | 7.095 |
| Sbsn         | 0.003 | 2.999 | -1.913 | 1.086  | -1.604 | -1.728 | -2.407 | 1.016  | 1.156  | Tlr5         | 7.027 |
| Tlr5         | 0.010 | 2.998 | -1.373 | 1.625  | -0.814 | -1.818 | -1.487 | 1.176  | 2.074  | Gm10503      | 7.000 |
| Capg         | 0.000 | 2.998 | -0.743 | 2.255  | -0.953 | -0.709 | -0.566 | 2.376  | 2.134  | Capg         | 6.968 |
| Tcf7l1       | 0.005 | 2.992 | 0.703  | 3.695  | 1.079  | 0.120  | 0.909  | 3.525  | 3.865  | Wdr72        | 6.922 |
| Gm20186      | 0.002 | 2.991 | -0.140 | 2.851  | -0.039 | -0.275 | -0.105 | 2.482  | 3.220  | Vwa5b1       | 6.913 |
| Gm12247      | 0.009 | 2.986 | 0.742  | 3.728  | 0.024  | 0.894  | 1.308  | 3.595  | 3.860  | Nr4a2        | 6.817 |
| Vwa5b1       | 0.000 | 2.985 | -0.281 | 2.704  | -0.283 | -0.146 | -0.414 | 2.797  | 2.612  | Sbsn         | 6.784 |
| Wdr72        | 0.000 | 2.985 | -0.081 | 2.904  | 0.045  | -0.293 | 0.006  | 2.747  | 3.061  | Tcf7l1       | 6.705 |
| Cd164l2      | 0.005 | 2.975 | 2.247  | 5.222  | 2.468  | 1.660  | 2.613  | 5.062  | 5.382  | Gm30551      | 6.641 |
| Nr4a2        | 0.001 | 2.955 | 2.606  | 5.560  | 2.537  | 2.515  | 2.764  | 5.778  | 5.343  | Cd164l2      | 6.606 |
| Gm30551      | 0.000 | 2.934 | 1.731  | 4.665  | 1.880  | 1.688  | 1.626  | 4.564  | 4.767  | Gm39271      | 6.603 |
| Ffar4        | 0.001 | 2.928 | 1.703  | 4.631  | 1.960  | 1.486  | 1.665  | 4.512  | 4.750  | Ffar4        | 6.565 |
| Gm39271      | 0.008 | 2.928 | -1.009 | 1.919  | -0.934 | -1.524 | -0.568 | 1.534  | 2.304  | Gm12247      | 6.458 |
| Aldh1a3      | 0.002 | 2.922 | -0.324 | 2.599  | -0.487 | -0.578 | 0.094  | 2.698  | 2.499  | Inava        | 6.457 |
| Rptoros      | 0.003 | 2.918 | 0.096  | 3.014  | 0.274  | 0.433  | -0.418 | 3.026  | 3.001  | Gm37352      | 6.449 |
| Elavl2       | 0.007 | 2.912 | -1.420 | 1.492  | -1.836 | -1.654 | -0.768 | 1.431  | 1.554  | Serpinh1     | 6.444 |
| Inava        | 0.001 | 2.905 | 0.415  | 3.320  | 0.676  | 0.323  | 0.247  | 3.193  | 3.448  | Aldh1a3      | 6.431 |
| Slc16a8      | 0.000 | 2.889 | -0.525 | 2.364  | -0.467 | -0.423 | -0.685 | 2.399  | 2.329  | Txnip        | 6.419 |
| Mvb12b       | 0.009 | 2.884 | -1.822 | 1.062  | -1.384 | -1.552 | -2.530 | 0.902  | 1.222  | Acot2        | 6.395 |
| Serpinh1     | 0.000 | 2.880 | 2.508  | 5.388  | 2.492  | 2.568  | 2.463  | 5.171  | 5.605  | Slc16a8      | 6.387 |
| Gm37352      | 0.001 | 2.880 | 0.602  | 3.481  | 0.518  | 0.747  | 0.541  | 3.234  | 3.729  | Mir7004      | 6.371 |
| Txnip        | 0.002 | 2.879 | 7.468  | 10.346 | 7.605  | 7.206  | 7.593  | 10.081 | 10.612 | Maml2        | 6.335 |
| Acot2        | 0.001 | 2.876 | 1.549  | 4.425  | 1.585  | 1.385  | 1.678  | 4.212  | 4.638  | Rptoros      | 6.327 |
| Maml2        | 0.000 | 2.873 | -0.308 | 2.566  | -0.468 | -0.270 | -0.184 | 2.432  | 2.700  | Gcgr         | 6.298 |

|               |       |       |        |       |        |        |        |       |       |               |       |
|---------------|-------|-------|--------|-------|--------|--------|--------|-------|-------|---------------|-------|
| Gcgr          | 0.000 | 2.868 | 4.593  | 7.461 | 4.763  | 4.480  | 4.537  | 7.339 | 7.583 | L3mbtl3       | 6.253 |
| Dnajc22       | 0.006 | 2.860 | -0.676 | 2.185 | -0.271 | -1.156 | -0.600 | 1.842 | 2.527 | Fam110c       | 6.248 |
| Fam110c       | 0.000 | 2.859 | -0.278 | 2.581 | -0.408 | -0.226 | -0.202 | 2.647 | 2.514 | Dnajc22       | 6.240 |
| Steap1        | 0.006 | 2.858 | -0.598 | 2.260 | -0.278 | -0.283 | -1.233 | 2.190 | 2.330 | Epb41l2       | 6.222 |
| Ceacam1       | 0.000 | 2.855 | 0.088  | 2.943 | 0.219  | -0.116 | 0.161  | 2.851 | 3.035 | Ceacam1       | 6.215 |
| D730005E14Rik | 0.003 | 2.848 | -1.217 | 1.631 | -1.590 | -1.287 | -0.774 | 1.516 | 1.746 | Gm14236       | 6.167 |
| Gm50456       | 0.006 | 2.845 | 0.235  | 3.080 | 0.754  | 0.000  | -0.049 | 2.789 | 3.370 | Casc1         | 6.134 |
| Gm14236       | 0.000 | 2.843 | 0.900  | 3.743 | 0.866  | 0.993  | 0.841  | 3.732 | 3.754 | Elavl2        | 6.129 |
| Wfdc16        | 0.003 | 2.842 | -0.874 | 1.968 | -0.712 | -1.302 | -0.608 | 1.756 | 2.180 | Wfdc16        | 6.095 |
| Kcnq1         | 0.003 | 2.840 | -0.255 | 2.586 | 0.114  | -0.132 | -0.746 | 2.662 | 2.509 | Tbx1          | 6.091 |
| Epb41l2       | 0.002 | 2.835 | -1.697 | 1.138 | -1.555 | -1.972 | -1.565 | 0.842 | 1.434 | Gm50456       | 6.084 |
| Aqp7          | 0.005 | 2.821 | 0.463  | 3.284 | 1.006  | 0.357  | 0.026  | 3.132 | 3.436 | Cd14          | 6.026 |
| L3mbtl3       | 0.002 | 2.820 | 0.105  | 2.926 | 0.174  | 0.031  | 0.112  | 2.587 | 3.264 | Mvb12b        | 6.024 |
| Tbx1          | 0.005 | 2.815 | -1.670 | 1.144 | -1.429 | -1.498 | -2.084 | 0.805 | 1.484 | D730005E14Rik | 6.024 |
| Nupr1         | 0.006 | 2.812 | 4.912  | 7.724 | 5.049  | 4.423  | 5.263  | 8.027 | 7.420 | Nupr1         | 5.972 |
| Kctd12        | 0.004 | 2.809 | 4.151  | 6.960 | 4.219  | 3.738  | 4.494  | 6.692 | 7.228 | Kctd12        | 5.971 |
| Mir466i       | 0.003 | 2.802 | 0.167  | 2.969 | 0.493  | 0.319  | -0.310 | 2.907 | 3.032 | Kcnq1         | 5.960 |
| Mir7004       | 0.006 | 2.802 | -0.188 | 2.614 | -0.173 | 0.000  | -0.391 | 3.125 | 2.102 | Steap1        | 5.945 |
| Gab1          | 0.001 | 2.792 | -0.816 | 1.976 | -0.530 | -1.074 | -0.844 | 1.842 | 2.110 | Lrrc39        | 5.927 |
| Cd14          | 0.005 | 2.788 | -0.826 | 1.963 | -0.843 | -1.128 | -0.505 | 2.333 | 1.592 | Gm42941       | 5.871 |
| Sec14l2       | 0.005 | 2.779 | -1.655 | 1.125 | -1.488 | -2.216 | -1.259 | 1.064 | 1.185 | Gab1          | 5.871 |
| Gm50321       | 0.002 | 2.769 | -1.432 | 1.337 | -1.762 | -1.205 | -1.329 | 1.121 | 1.553 | Prr36         | 5.848 |
| Casc1         | 0.004 | 2.763 | -0.968 | 1.795 | -1.020 | -1.025 | -0.858 | 1.328 | 2.262 | Aqp7          | 5.823 |
| Gm42941       | 0.001 | 2.759 | 2.258  | 5.016 | 2.330  | 2.271  | 2.172  | 5.278 | 4.755 | Gm50321       | 5.803 |
| Tspan2os      | 0.010 | 2.758 | -0.282 | 2.476 | 0.323  | -0.382 | -0.788 | 2.206 | 2.746 | Mir466i       | 5.793 |
| Pygl          | 0.000 | 2.751 | 0.524  | 3.276 | 0.485  | 0.475  | 0.613  | 3.224 | 3.327 | Pygl          | 5.732 |
| Shank1        | 0.000 | 2.746 | -0.113 | 2.633 | -0.025 | -0.192 | -0.122 | 2.587 | 2.679 | Rassf2        | 5.730 |
| Rassf2        | 0.001 | 2.742 | -1.263 | 1.479 | -1.263 | -1.442 | -1.083 | 1.262 | 1.696 | Shank1        | 5.704 |
| Tlcd2         | 0.004 | 2.737 | 0.115  | 2.852 | 0.581  | 0.073  | -0.310 | 2.698 | 3.006 | Pttg1         | 5.692 |
| Prr36         | 0.004 | 2.737 | -0.885 | 1.852 | -0.647 | -1.088 | -0.919 | 1.469 | 2.235 | Gm26532       | 5.668 |
| Mir7093       | 0.002 | 2.729 | -0.084 | 2.645 | 0.169  | -0.421 | 0.000  | 2.467 | 2.823 | Axin2         | 5.658 |
| Axin2         | 0.002 | 2.727 | 1.066  | 3.793 | 0.924  | 1.322  | 0.950  | 3.552 | 4.033 | Apc2          | 5.624 |
| Gm26532       | 0.001 | 2.727 | 3.367  | 6.094 | 3.152  | 3.542  | 3.407  | 6.332 | 5.856 | Sec14l2       | 5.618 |
| Lrrc39        | 0.005 | 2.721 | -0.803 | 1.917 | -0.881 | -0.830 | -0.699 | 1.452 | 2.382 | Mir7093       | 5.585 |
| Mapkapk3      | 0.001 | 2.718 | 1.490  | 4.208 | 1.644  | 1.215  | 1.612  | 4.177 | 4.238 | Ttc9          | 5.573 |
| Pttg1         | 0.002 | 2.716 | 0.712  | 3.428 | 0.669  | 0.557  | 0.910  | 3.114 | 3.742 | Tspan2os      | 5.539 |
| Wdr49         | 0.002 | 2.712 | 0.276  | 2.988 | 0.127  | 0.094  | 0.607  | 3.168 | 2.807 | Kl            | 5.522 |
| Emid1         | 0.003 | 2.711 | 2.180  | 4.892 | 1.996  | 2.632  | 1.913  | 4.900 | 4.884 | Mapkapk3      | 5.521 |
| Angptl1       | 0.005 | 2.709 | -1.690 | 1.019 | -2.060 | -1.235 | -1.776 | 0.741 | 1.297 | Wdr49         | 5.514 |
| Ttc9          | 0.001 | 2.709 | 0.988  | 3.697 | 1.205  | 0.810  | 0.949  | 3.473 | 3.920 | Tlcd2         | 5.495 |
| Kl            | 0.000 | 2.708 | 3.468  | 6.176 | 3.345  | 3.527  | 3.532  | 6.146 | 6.205 | Lingo4        | 5.488 |
| Apc2          | 0.002 | 2.706 | -1.195 | 1.511 | -1.005 | -1.282 | -1.298 | 1.226 | 1.797 | Muc1          | 5.480 |
| Gm19032       | 0.002 | 2.705 | 0.406  | 3.112 | 0.077  | 0.350  | 0.792  | 3.145 | 3.079 | Angptl1       | 5.472 |
| Muc1          | 0.001 | 2.692 | -0.111 | 2.580 | -0.239 | -0.151 | 0.057  | 2.750 | 2.411 | Arhgap29      | 5.462 |
| Smpd2         | 0.000 | 2.677 | 3.854  | 6.531 | 3.968  | 3.751  | 3.843  | 6.569 | 6.494 | Cep162        | 5.420 |
| Adgrf5        | 0.000 | 2.665 | 1.159  | 3.824 | 1.095  | 1.237  | 1.144  | 3.737 | 3.911 | Aqp4          | 5.406 |
| Nacad         | 0.002 | 2.663 | 1.927  | 4.590 | 2.110  | 2.031  | 1.638  | 4.854 | 4.325 | Gm19032       | 5.388 |
| Trim34b       | 0.006 | 2.658 | -0.775 | 1.882 | -0.382 | -1.092 | -0.852 | 2.238 | 1.527 | Smpd2         | 5.387 |
| Lingo4        | 0.005 | 2.655 | -1.079 | 1.577 | -1.304 | -0.839 | -1.093 | 1.176 | 1.977 | Emid1         | 5.382 |
| Sinhcaf       | 0.002 | 2.648 | -0.004 | 2.644 | -0.100 | -0.207 | 0.295  | 2.459 | 2.829 | Nacad         | 5.378 |
| Gm10110       | 0.004 | 2.638 | -1.437 | 1.200 | -1.738 | -0.989 | -1.584 | 1.415 | 0.986 | Trim34b       | 5.367 |
| Errfi1        | 0.001 | 2.635 | 5.337  | 7.972 | 5.357  | 5.207  | 5.448  | 8.253 | 7.691 | Adgrf5        | 5.350 |
| A1cf          | 0.004 | 2.628 | 0.319  | 2.947 | 0.590  | 0.299  | 0.068  | 2.611 | 3.283 | Gm16308       | 5.325 |
| Gm16308       | 0.002 | 2.628 | 2.175  | 4.803 | 2.121  | 2.102  | 2.302  | 4.478 | 5.128 | Errfi1        | 5.314 |
| Gcg           | 0.004 | 2.627 | 6.857  | 9.484 | 7.019  | 6.461  | 7.091  | 9.234 | 9.734 | A1cf          | 5.280 |
| Arhgap29      | 0.006 | 2.627 | 0.474  | 3.101 | 0.573  | 0.570  | 0.278  | 2.642 | 3.560 | Sinhcaf       | 5.249 |
| Pgm2l1        | 0.001 | 2.624 | 2.684  | 5.308 | 2.712  | 2.622  | 2.717  | 5.074 | 5.542 | Pgm2l1        | 5.244 |
| Cyp2j12       | 0.002 | 2.621 | 0.798  | 3.419 | 1.032  | 0.820  | 0.542  | 3.212 | 3.627 | Chrna4        | 5.179 |
| Ddit4l        | 0.005 | 2.620 | -1.035 | 1.585 | -1.097 | -1.465 | -0.543 | 1.660 | 1.509 | Gcg           | 5.158 |
| Pcolce2       | 0.001 | 2.614 | -0.636 | 1.978 | -0.593 | -0.938 | -0.376 | 1.904 | 2.052 | Cyp2j12       | 5.158 |
| Aqp4          | 0.005 | 2.613 | 3.562  | 6.175 | 3.436  | 3.730  | 3.520  | 5.716 | 6.634 | Gm10110       | 5.130 |
| Chrna4        | 0.001 | 2.606 | -1.052 | 1.554 | -1.145 | -0.969 | -1.041 | 1.814 | 1.294 | Dock5         | 5.072 |
| Tshz2         | 0.000 | 2.601 | 3.020  | 5.620 | 3.010  | 2.986  | 3.063  | 5.584 | 5.657 | Tshz2         | 5.066 |
| Pamr1         | 0.000 | 2.591 | 2.607  | 5.198 | 2.647  | 2.472  | 2.702  | 5.269 | 5.126 | Pcolce2       | 5.053 |
| Tgm2          | 0.001 | 2.584 | -0.149 | 2.435 | -0.153 | -0.289 | -0.006 | 2.259 | 2.611 | Scarf2        | 5.026 |
| Thbs1         | 0.004 | 2.583 | 0.599  | 3.182 | 0.581  | 0.185  | 1.030  | 3.085 | 3.278 | Phactr2       | 5.025 |

|               |       |       |        |       |        |        |        |       |       |               |       |
|---------------|-------|-------|--------|-------|--------|--------|--------|-------|-------|---------------|-------|
| Kdelr3        | 0.001 | 2.580 | 3.722  | 6.302 | 3.795  | 3.461  | 3.908  | 6.223 | 6.380 | Tgm2          | 5.022 |
| Phactr2       | 0.001 | 2.578 | -0.293 | 2.285 | -0.337 | -0.178 | -0.365 | 2.078 | 2.492 | Pamr1         | 5.018 |
| Myliip        | 0.001 | 2.577 | 1.272  | 3.849 | 1.445  | 0.962  | 1.410  | 3.771 | 3.928 | Gprc5c        | 4.969 |
| Gprc5c        | 0.000 | 2.576 | 3.703  | 6.280 | 3.699  | 3.724  | 3.687  | 6.227 | 6.333 | Gm13528       | 4.962 |
| Cep162        | 0.009 | 2.574 | 3.595  | 6.169 | 3.581  | 3.542  | 3.662  | 5.600 | 6.738 | Gm47268       | 4.962 |
| Nek10         | 0.001 | 2.569 | -0.027 | 2.541 | -0.158 | -0.155 | 0.231  | 2.363 | 2.720 | Ddit4l        | 4.944 |
| Gm13528       | 0.010 | 2.565 | 0.969  | 3.534 | 0.470  | 1.258  | 1.177  | 3.146 | 3.921 | Kdelr3        | 4.938 |
| Procr         | 0.002 | 2.561 | 1.121  | 3.682 | 1.068  | 0.879  | 1.415  | 3.530 | 3.834 | Nek10         | 4.929 |
| Gm47268       | 0.001 | 2.555 | 0.000  | 2.555 | 0.000  | 0.000  | 0.000  | 2.312 | 2.799 | Myliip        | 4.908 |
| Gm14165       | 0.008 | 2.554 | -1.099 | 1.455 | -1.483 | -1.335 | -0.478 | 1.440 | 1.471 | Procr         | 4.864 |
| Dock5         | 0.003 | 2.551 | -0.880 | 1.671 | -0.825 | -0.866 | -0.951 | 2.060 | 1.281 | Plekhhb1      | 4.861 |
| Slc25a18      | 0.001 | 2.548 | -0.980 | 1.568 | -0.680 | -1.139 | -1.121 | 1.435 | 1.701 | Jph4          | 4.854 |
| Cib3          | 0.007 | 2.547 | 1.148  | 3.695 | 1.415  | 0.653  | 1.376  | 3.416 | 3.975 | Thbs1         | 4.836 |
| Plekhhb1      | 0.003 | 2.543 | 1.678  | 4.222 | 1.975  | 1.440  | 1.621  | 4.491 | 3.953 | Slc25a18      | 4.807 |
| Bcl2l12       | 0.000 | 2.542 | 0.234  | 2.776 | 0.088  | 0.398  | 0.215  | 2.806 | 2.745 | Bcl2l12       | 4.802 |
| Zfp385a       | 0.006 | 2.536 | -1.077 | 1.459 | -1.562 | -0.889 | -0.780 | 1.204 | 1.713 | Ly6h          | 4.798 |
| Scarf2        | 0.007 | 2.533 | 2.305  | 4.838 | 2.384  | 2.038  | 2.494  | 4.383 | 5.294 | Cib3          | 4.793 |
| Jph4          | 0.001 | 2.527 | 1.103  | 3.630 | 1.226  | 0.994  | 1.090  | 3.359 | 3.902 | Mboat1        | 4.781 |
| Mboat1        | 0.000 | 2.525 | -1.433 | 1.092 | -1.366 | -1.512 | -1.421 | 0.946 | 1.238 | Lama5         | 4.740 |
| D16Ertd472e   | 0.004 | 2.522 | -0.481 | 2.041 | -0.919 | -0.290 | -0.235 | 2.236 | 1.845 | Zfp385a       | 4.732 |
| Plcd1         | 0.004 | 2.515 | -0.017 | 2.498 | -0.124 | -0.335 | 0.407  | 2.665 | 2.330 | D16Ertd472e   | 4.671 |
| Ly6h          | 0.004 | 2.515 | -1.390 | 1.125 | -1.264 | -1.679 | -1.227 | 0.808 | 1.442 | Akap6         | 4.667 |
| Gas6          | 0.003 | 2.513 | 0.022  | 2.536 | 0.240  | -0.350 | 0.177  | 2.705 | 2.366 | H2-Q7         | 4.663 |
| Glo1-ps       | 0.006 | 2.509 | 1.355  | 3.864 | 0.798  | 1.645  | 1.622  | 3.855 | 3.874 | Gas6          | 4.657 |
| Lama5         | 0.000 | 2.509 | -0.574 | 1.935 | -0.529 | -0.565 | -0.628 | 1.743 | 2.127 | Espnl         | 4.642 |
| Gm12735       | 0.008 | 2.509 | -0.763 | 1.746 | -0.934 | -0.202 | -1.153 | 1.534 | 1.957 | Lad1          | 4.625 |
| Lad1          | 0.000 | 2.499 | 2.044  | 4.543 | 1.923  | 2.254  | 1.955  | 4.578 | 4.509 | Spsb1         | 4.624 |
| Gm45805       | 0.005 | 2.497 | 2.493  | 4.990 | 2.635  | 2.058  | 2.786  | 5.213 | 4.766 | Plcd1         | 4.618 |
| Spsb1         | 0.001 | 2.496 | 0.737  | 3.233 | 0.954  | 0.493  | 0.764  | 3.084 | 3.382 | Trac          | 4.617 |
| Trac          | 0.002 | 2.488 | 0.392  | 2.880 | 0.206  | 0.276  | 0.694  | 2.649 | 3.111 | Gm14165       | 4.589 |
| Gm11460       | 0.002 | 2.487 | 1.865  | 4.352 | 1.791  | 2.168  | 1.637  | 4.512 | 4.191 | Gm45805       | 4.586 |
| 1700063D05Rik | 0.005 | 2.486 | 0.639  | 3.126 | 0.977  | 0.183  | 0.759  | 2.956 | 3.295 | Gm11460       | 4.571 |
| Espnl         | 0.000 | 2.485 | 0.091  | 2.576 | 0.131  | 0.036  | 0.105  | 2.394 | 2.758 | Actn2         | 4.552 |
| Ifitm2        | 0.002 | 2.477 | 2.674  | 5.151 | 2.580  | 2.406  | 3.035  | 5.018 | 5.283 | Gm12219       | 4.530 |
| Akap6         | 0.002 | 2.474 | 0.563  | 3.038 | 0.441  | 0.697  | 0.552  | 3.343 | 2.732 | Gm12735       | 4.519 |
| Gm14838       | 0.004 | 2.464 | -0.673 | 1.791 | -0.542 | -1.132 | -0.345 | 1.756 | 1.826 | Plac8         | 4.517 |
| Plac8         | 0.000 | 2.464 | -0.853 | 1.611 | -0.902 | -0.876 | -0.780 | 1.555 | 1.667 | Gm45104       | 4.512 |
| Actn2         | 0.002 | 2.461 | 2.215  | 4.677 | 2.102  | 2.096  | 2.447  | 4.429 | 4.924 | Glo1-ps       | 4.499 |
| Gm45104       | 0.000 | 2.461 | 0.092  | 2.552 | 0.167  | -0.029 | 0.137  | 2.439 | 2.665 | 1700063D05Rik | 4.498 |
| Wwc1          | 0.000 | 2.458 | 2.789  | 5.247 | 2.741  | 2.620  | 3.007  | 5.283 | 5.210 | Ifitm2        | 4.494 |
| Gm22395       | 0.003 | 2.457 | 0.203  | 2.660 | 0.000  | 0.000  | 0.609  | 2.540 | 2.780 | Klf10         | 4.491 |
| Hmgcs1        | 0.000 | 2.457 | 4.053  | 6.510 | 4.019  | 4.186  | 3.953  | 6.439 | 6.582 | Akr1c14       | 4.487 |
| Akr1c14       | 0.000 | 2.455 | 3.571  | 6.026 | 3.517  | 3.585  | 3.611  | 5.955 | 6.096 | Hmgcs1        | 4.485 |
| Klf10         | 0.001 | 2.442 | 3.551  | 5.993 | 3.570  | 3.692  | 3.391  | 5.753 | 6.233 | Wwc1          | 4.460 |
| Zfp185        | 0.009 | 2.437 | -1.160 | 1.277 | -1.636 | -0.918 | -0.925 | 1.618 | 0.936 | Gm17334       | 4.434 |
| Gm22990       | 0.009 | 2.436 | -0.505 | 1.931 | -0.648 | 0.000  | -0.867 | 2.235 | 1.627 | Zfp185        | 4.426 |
| Frem2         | 0.002 | 2.433 | -1.360 | 1.072 | -1.677 | -1.307 | -1.097 | 1.176 | 0.969 | Cyp39a1       | 4.407 |
| Gm35876       | 0.007 | 2.432 | -0.592 | 1.840 | -0.693 | -1.020 | -0.063 | 1.742 | 1.938 | Gm22395       | 4.399 |
| Cyp39a1       | 0.000 | 2.432 | 2.073  | 4.505 | 2.039  | 2.019  | 2.162  | 4.615 | 4.395 | Il6ra         | 4.384 |
| H2-Q7         | 0.007 | 2.429 | -1.437 | 0.992 | -1.324 | -1.395 | -1.591 | 1.468 | 0.517 | Trip10        | 4.381 |
| Gm17334       | 0.007 | 2.428 | 0.979  | 3.407 | 1.066  | 0.596  | 1.276  | 3.754 | 3.059 | Gm14838       | 4.380 |
| Il6ra         | 0.000 | 2.426 | 4.010  | 6.435 | 3.983  | 4.022  | 4.024  | 6.342 | 6.528 | Gm22990       | 4.347 |
| Gm12219       | 0.003 | 2.425 | -0.931 | 1.494 | -0.964 | -0.969 | -0.860 | 1.142 | 1.847 | Kcnh6         | 4.345 |
| Trip10        | 0.000 | 2.425 | 0.969  | 3.394 | 1.013  | 1.012  | 0.881  | 3.505 | 3.283 | Gm49980       | 4.341 |
| Gm49980       | 0.000 | 2.417 | 6.274  | 8.691 | 6.279  | 6.215  | 6.328  | 8.733 | 8.650 | Frem2         | 4.340 |
| Gm49413       | 0.004 | 2.416 | -1.285 | 1.131 | -1.742 | -1.010 | -1.102 | 1.156 | 1.106 | Gm45838       | 4.329 |
| Gm45838       | 0.000 | 2.416 | 0.187  | 2.602 | 0.214  | 0.266  | 0.080  | 2.637 | 2.568 | Gfra4         | 4.299 |
| Kcnh6         | 0.004 | 2.412 | 4.977  | 7.389 | 5.133  | 4.637  | 5.161  | 7.116 | 7.662 | Esrp2         | 4.285 |
| Rasal3        | 0.007 | 2.403 | -0.483 | 1.920 | -0.364 | -0.138 | -0.948 | 1.694 | 2.145 | Srl           | 4.279 |
| Esrp2         | 0.000 | 2.401 | 2.520  | 4.922 | 2.614  | 2.496  | 2.450  | 5.003 | 4.840 | Myof          | 4.268 |
| Gm13420       | 0.003 | 2.401 | 1.659  | 4.060 | 1.667  | 1.316  | 1.993  | 3.959 | 4.161 | Gm43758       | 4.260 |
| Myof          | 0.001 | 2.398 | 0.863  | 3.260 | 0.753  | 1.106  | 0.729  | 3.091 | 3.430 | Cbr3          | 4.251 |
| Gm43758       | 0.004 | 2.395 | -1.377 | 1.018 | -1.107 | -1.697 | -1.326 | 0.776 | 1.261 | Rasal3        | 4.212 |
| Lingo3        | 0.001 | 2.392 | 0.467  | 2.859 | 0.554  | 0.659  | 0.187  | 2.921 | 2.797 | Gm49413       | 4.210 |
| Srl           | 0.001 | 2.385 | 0.142  | 2.526 | 0.163  | 0.199  | 0.063  | 2.747 | 2.306 | Gm35876       | 4.205 |
| Gm24689       | 0.008 | 2.381 | -0.322 | 2.060 | -0.873 | 0.000  | -0.091 | 2.232 | 1.887 | Lingo3        | 4.204 |

|               |       |       |        |        |        |        |        |        |        |               |       |
|---------------|-------|-------|--------|--------|--------|--------|--------|--------|--------|---------------|-------|
| 1810019D21Rik | 0.000 | 2.381 | 2.627  | 5.007  | 2.783  | 2.563  | 2.534  | 4.994  | 5.021  | Gm13420       | 4.199 |
| Gfra4         | 0.002 | 2.379 | -0.460 | 1.919  | -0.395 | -0.557 | -0.427 | 1.630  | 2.208  | 1810019D21Rik | 4.193 |
| Cbr3          | 0.001 | 2.376 | 1.606  | 3.981  | 1.466  | 1.659  | 1.692  | 3.740  | 4.223  | Gnas          | 4.182 |
| Gnas          | 0.000 | 2.375 | 2.127  | 4.502  | 2.221  | 2.129  | 2.030  | 4.468  | 4.536  | Pdk1          | 4.158 |
| Cables1       | 0.002 | 2.372 | -0.109 | 2.263  | 0.188  | -0.347 | -0.168 | 2.144  | 2.382  | Slc19a2       | 4.151 |
| Slc19a2       | 0.000 | 2.371 | 1.920  | 4.290  | 1.993  | 2.035  | 1.731  | 4.326  | 4.254  | Gpr155        | 4.140 |
| Slc25a13      | 0.004 | 2.370 | -0.347 | 2.023  | -0.391 | 0.047  | -0.697 | 2.074  | 1.972  | Dpp4          | 4.134 |
| Gpr155        | 0.000 | 2.365 | 1.236  | 3.600  | 1.403  | 1.102  | 1.203  | 3.689  | 3.512  | Cables1       | 4.132 |
| Nefm          | 0.000 | 2.359 | 3.879  | 6.238  | 3.881  | 3.722  | 4.034  | 6.265  | 6.211  | Pmepa1        | 4.126 |
| Mfge8         | 0.001 | 2.357 | 0.350  | 2.707  | 0.476  | 0.074  | 0.500  | 2.827  | 2.587  | Sik1          | 4.115 |
| Dpp4          | 0.000 | 2.349 | 2.611  | 4.961  | 2.657  | 2.543  | 2.635  | 4.778  | 5.144  | Nefm          | 4.112 |
| Igfbp5        | 0.004 | 2.346 | 4.160  | 6.506  | 4.050  | 4.488  | 3.942  | 6.231  | 6.781  | Igfbp5        | 4.106 |
| Sczep1os      | 0.001 | 2.342 | -0.488 | 1.854  | -0.251 | -0.619 | -0.595 | 1.784  | 1.924  | Ctf1          | 4.106 |
| Ctf1          | 0.000 | 2.341 | 1.558  | 3.898  | 1.594  | 1.534  | 1.544  | 3.715  | 4.082  | Mfge8         | 4.094 |
| Crybb1        | 0.004 | 2.334 | -0.606 | 1.728  | -0.947 | -0.707 | -0.165 | 1.736  | 1.719  | Ror1          | 4.083 |
| Smad3         | 0.001 | 2.329 | 0.030  | 2.358  | 0.172  | 0.114  | -0.198 | 2.304  | 2.413  | Gm24689       | 4.070 |
| Insl6         | 0.002 | 2.325 | 0.852  | 3.177  | 1.167  | 0.724  | 0.665  | 3.287  | 3.068  | Klhdc8b       | 4.057 |
| Gm4332        | 0.000 | 2.324 | -0.500 | 1.824  | -0.607 | -0.390 | -0.504 | 1.778  | 1.869  | Slc25a13      | 4.056 |
| Nhs1          | 0.000 | 2.319 | 1.190  | 3.509  | 1.193  | 1.175  | 1.202  | 3.552  | 3.466  | Sczep1os      | 4.042 |
| Jam2          | 0.001 | 2.317 | -1.233 | 1.084  | -1.211 | -1.466 | -1.022 | 1.007  | 1.161  | Gm4332        | 4.000 |
| Gm14261       | 0.007 | 2.314 | 0.121  | 2.435  | 0.202  | 0.510  | -0.350 | 2.286  | 2.583  | Smad3         | 3.997 |
| Sema4g        | 0.003 | 2.314 | -0.653 | 1.661  | -0.539 | -0.960 | -0.460 | 1.467  | 1.855  | Nhs1          | 3.991 |
| Sik1          | 0.008 | 2.311 | 3.127  | 5.438  | 3.272  | 2.831  | 3.279  | 5.850  | 5.027  | Insl6         | 3.964 |
| Gm30671       | 0.000 | 2.310 | -0.924 | 1.386  | -0.901 | -0.754 | -1.119 | 1.397  | 1.374  | Sema4g        | 3.962 |
| Gm30173       | 0.000 | 2.306 | 2.152  | 4.458  | 2.288  | 1.956  | 2.211  | 4.382  | 4.533  | Jam2          | 3.951 |
| Pmepa1        | 0.006 | 2.301 | 1.405  | 3.706  | 1.300  | 1.556  | 1.358  | 4.127  | 3.285  | Gm30671       | 3.934 |
| Ror1          | 0.008 | 2.300 | -0.578 | 1.722  | -0.307 | -0.829 | -0.598 | 1.298  | 2.146  | Gm30173       | 3.929 |
| Ldlrap1       | 0.001 | 2.297 | 0.774  | 3.071  | 0.929  | 0.720  | 0.673  | 2.920  | 3.222  | Ldlrap1       | 3.927 |
| Adnp          | 0.001 | 2.297 | -0.010 | 2.287  | -0.183 | 0.174  | -0.021 | 2.128  | 2.445  | Adnp          | 3.918 |
| Pdk1          | 0.007 | 2.296 | 2.574  | 4.870  | 2.533  | 2.633  | 2.556  | 4.411  | 5.329  | Crybb1        | 3.910 |
| Kcnc1         | 0.000 | 2.290 | -0.968 | 1.322  | -0.825 | -1.051 | -1.028 | 1.203  | 1.440  | Kcnc1         | 3.896 |
| Klb           | 0.004 | 2.289 | 0.998  | 3.286  | 1.176  | 0.578  | 1.239  | 3.257  | 3.316  | Kank2         | 3.880 |
| Zfp703        | 0.002 | 2.287 | 1.244  | 3.532  | 0.932  | 1.404  | 1.397  | 3.480  | 3.584  | Gm14261       | 3.855 |
| Fut1          | 0.010 | 2.280 | 1.726  | 4.005  | 1.835  | 1.211  | 2.131  | 3.779  | 4.231  | Spon2         | 3.835 |
| Kank2         | 0.003 | 2.271 | 0.829  | 3.100  | 0.989  | 0.570  | 0.927  | 2.821  | 3.379  | Zfp703        | 3.830 |
| Spon2         | 0.000 | 2.270 | 2.144  | 4.414  | 2.148  | 2.066  | 2.218  | 4.294  | 4.534  | Klb           | 3.790 |
| Wnt5b         | 0.001 | 2.270 | 0.995  | 3.265  | 1.097  | 0.721  | 1.166  | 3.325  | 3.204  | Wnt5b         | 3.784 |
| Klhdc8b       | 0.009 | 2.265 | 1.029  | 3.294  | 1.193  | 0.976  | 0.918  | 2.816  | 3.773  | Snx33         | 3.775 |
| Socs3         | 0.004 | 2.260 | 5.433  | 7.694  | 5.765  | 5.012  | 5.524  | 7.649  | 7.738  | Gm2115        | 3.757 |
| Snx33         | 0.000 | 2.259 | 2.452  | 4.711  | 2.431  | 2.337  | 2.590  | 4.668  | 4.755  | Fut1          | 3.753 |
| Gm2115        | 0.002 | 2.254 | -0.327 | 1.927  | -0.072 | -0.560 | -0.350 | 2.098  | 1.756  | Sh2d5         | 3.726 |
| Nek5          | 0.004 | 2.251 | 0.282  | 2.533  | 0.477  | 0.532  | -0.163 | 2.562  | 2.504  | Mafb          | 3.722 |
| Kdm6bos       | 0.007 | 2.246 | -0.423 | 1.823  | -0.080 | -0.892 | -0.298 | 1.966  | 1.681  | Fam3d         | 3.706 |
| Fam3d         | 0.003 | 2.246 | 0.214  | 2.460  | 0.421  | -0.130 | 0.351  | 2.304  | 2.616  | Tifa          | 3.701 |
| Mafb          | 0.003 | 2.245 | 2.719  | 4.963  | 2.870  | 2.888  | 2.397  | 4.778  | 5.148  | Myo1e         | 3.693 |
| Rpl26         | 0.001 | 2.238 | 5.212  | 7.450  | 5.066  | 5.508  | 5.063  | 7.466  | 7.434  | Vegfc         | 3.688 |
| Prss8         | 0.000 | 2.234 | 2.028  | 4.262  | 2.112  | 1.842  | 2.129  | 4.312  | 4.211  | Prss8         | 3.688 |
| Myo1e         | 0.001 | 2.232 | 2.850  | 5.082  | 2.750  | 3.066  | 2.733  | 5.216  | 4.948  | Socs3         | 3.684 |
| Gm47958       | 0.006 | 2.231 | 1.018  | 3.250  | 1.448  | 0.617  | 0.989  | 3.275  | 3.225  | Rpl26         | 3.666 |
| Epha1         | 0.006 | 2.224 | -0.594 | 1.630  | -0.903 | -0.102 | -0.776 | 1.612  | 1.648  | Nek5          | 3.656 |
| Slco2a1       | 0.002 | 2.219 | 0.411  | 2.630  | 0.561  | 0.097  | 0.574  | 2.617  | 2.643  | Grb10         | 3.646 |
| Tifa          | 0.001 | 2.218 | 2.172  | 4.390  | 2.167  | 2.212  | 2.136  | 4.600  | 4.180  | Kdm6bos       | 3.641 |
| Vegfc         | 0.001 | 2.216 | -0.200 | 2.016  | -0.183 | -0.090 | -0.327 | 2.234  | 1.799  | Gm12406       | 3.605 |
| Grb10         | 0.000 | 2.213 | 2.945  | 5.157  | 2.898  | 2.896  | 3.040  | 5.276  | 5.039  | Mcoln3        | 3.604 |
| Slco1a5       | 0.002 | 2.202 | -0.235 | 1.967  | 0.053  | -0.339 | -0.420 | 1.871  | 2.063  | Slco2a1       | 3.604 |
| Gm15775       | 0.005 | 2.201 | -0.442 | 1.759  | -0.659 | -0.664 | -0.003 | 1.809  | 1.709  | Sall4         | 3.604 |
| Gm12406       | 0.003 | 2.193 | 1.036  | 3.230  | 0.906  | 1.284  | 0.919  | 2.984  | 3.475  | Ascl4         | 3.601 |
| Boc           | 0.000 | 2.193 | 1.341  | 3.534  | 1.380  | 1.282  | 1.359  | 3.421  | 3.646  | Nrsn1         | 3.587 |
| Sall4         | 0.002 | 2.192 | 1.079  | 3.270  | 1.238  | 1.055  | 0.943  | 3.053  | 3.488  | Boc           | 3.585 |
| Gm24762       | 0.002 | 2.187 | -0.143 | 2.045  | 0.127  | -0.463 | -0.091 | 2.010  | 2.080  | Gm47958       | 3.568 |
| Fgl2          | 0.000 | 2.182 | 5.300  | 7.482  | 5.213  | 5.267  | 5.421  | 7.472  | 7.492  | Slco1a5       | 3.564 |
| Gm49041       | 0.002 | 2.178 | 1.659  | 3.837  | 1.598  | 1.398  | 1.981  | 3.752  | 3.922  | Mir99b        | 3.562 |
| Adamtsl4      | 0.002 | 2.177 | -0.908 | 1.269  | -0.654 | -0.891 | -1.179 | 1.385  | 1.154  | Baiap2        | 3.540 |
| Mcoln3        | 0.003 | 2.177 | -0.830 | 1.347  | -0.845 | -0.664 | -0.981 | 1.651  | 1.043  | Gm44066       | 3.534 |
| Cyp4v3        | 0.000 | 2.177 | 3.863  | 6.040  | 3.878  | 3.790  | 3.920  | 5.995  | 6.084  | Slc6a9        | 3.531 |
| Sst           | 0.008 | 2.174 | 10.086 | 12.260 | 10.479 | 9.701  | 10.077 | 12.021 | 12.499 | Epha1         | 3.529 |



|               |       |       |        |       |        |        |        |        |       |               |       |
|---------------|-------|-------|--------|-------|--------|--------|--------|--------|-------|---------------|-------|
| Tcf7l2        | 0.002 | 2.173 | 0.374  | 2.547 | 0.464  | 0.599  | 0.060  | 2.493  | 2.601 | Fgl2          | 3.528 |
| Slc6a9        | 0.001 | 2.173 | 0.092  | 2.265 | -0.009 | 0.039  | 0.247  | 2.083  | 2.447 | Cyp4v3        | 3.521 |
| Gm8439        | 0.001 | 2.172 | 0.439  | 2.611 | 0.283  | 0.331  | 0.702  | 2.540  | 2.681 | Anks6         | 3.496 |
| Gm44066       | 0.003 | 2.170 | 0.745  | 2.915 | 0.715  | 0.540  | 0.982  | 2.660  | 3.170 | Gm24762       | 3.493 |
| Ascl4         | 0.003 | 2.167 | -1.142 | 1.025 | -1.053 | -1.247 | -1.127 | 0.698  | 1.353 | Gm15775       | 3.491 |
| Anks6         | 0.000 | 2.167 | 3.276  | 5.443 | 3.332  | 3.239  | 3.258  | 5.358  | 5.527 | Adamtsl4      | 3.488 |
| Plekhg1       | 0.008 | 2.165 | -0.937 | 1.229 | -0.986 | -1.374 | -0.449 | 1.165  | 1.293 | Gm8439        | 3.473 |
| Sh2d5         | 0.009 | 2.164 | 2.221  | 4.385 | 2.316  | 2.160  | 2.187  | 3.904  | 4.865 | Gm49041       | 3.469 |
| Baiap2        | 0.005 | 2.163 | 1.078  | 3.242 | 1.310  | 0.847  | 1.079  | 3.546  | 2.938 | Sst           | 3.465 |
| Nrsn1         | 0.003 | 2.163 | 1.821  | 3.984 | 1.735  | 1.875  | 1.852  | 3.661  | 4.306 | Gm31518       | 3.458 |
| Dnmt3l-ps1    | 0.006 | 2.163 | -0.668 | 1.495 | -0.376 | -0.530 | -1.097 | 1.667  | 1.322 | Tcf7l2        | 3.458 |
| Gm31518       | 0.000 | 2.155 | 2.707  | 4.861 | 2.644  | 2.743  | 2.734  | 4.946  | 4.776 | Gm44164       | 3.453 |
| Gm44164       | 0.000 | 2.152 | 2.001  | 4.153 | 1.964  | 2.023  | 2.014  | 4.065  | 4.241 | Pdlim7        | 3.448 |
| Nfkb2         | 0.004 | 2.151 | 2.112  | 4.263 | 2.040  | 2.474  | 1.822  | 4.377  | 4.148 | Fxyd1         | 3.423 |
| Pygo1         | 0.009 | 2.149 | 0.248  | 2.397 | 0.665  | 0.241  | -0.162 | 2.172  | 2.621 | Dnmt3l-ps1    | 3.411 |
| Slc14a2       | 0.001 | 2.148 | 1.429  | 3.577 | 1.135  | 1.584  | 1.567  | 3.595  | 3.559 | Zfp503        | 3.403 |
| Fxyd1         | 0.000 | 2.142 | -0.685 | 1.458 | -0.623 | -0.647 | -0.785 | 1.570  | 1.345 | Atf3          | 3.399 |
| Atf3          | 0.002 | 2.139 | 7.802  | 9.941 | 7.805  | 7.565  | 8.037  | 10.117 | 9.765 | Artn          | 3.394 |
| Artn          | 0.007 | 2.136 | -1.168 | 0.968 | -0.881 | -1.087 | -1.535 | 0.701  | 1.235 | Slc14a2       | 3.389 |
| Tmem30b       | 0.001 | 2.127 | 3.727  | 5.854 | 3.841  | 3.778  | 3.562  | 5.724  | 5.984 | Aldh3b1       | 3.386 |
| Sash1         | 0.000 | 2.125 | 1.606  | 3.731 | 1.684  | 1.605  | 1.527  | 3.691  | 3.770 | Micall2       | 3.385 |
| Prss16        | 0.000 | 2.125 | 0.060  | 2.185 | 0.101  | -0.038 | 0.118  | 2.245  | 2.125 | Nfkb2         | 3.375 |
| Sh3bgr        | 0.000 | 2.125 | 0.945  | 3.069 | 0.855  | 1.129  | 0.850  | 3.056  | 3.083 | Tmem30b       | 3.370 |
| Pdlim7        | 0.004 | 2.124 | 1.910  | 4.034 | 2.056  | 1.951  | 1.723  | 3.712  | 4.356 | Pygo1         | 3.367 |
| Pik3c2g       | 0.007 | 2.122 | 0.611  | 2.733 | 0.717  | 0.142  | 0.974  | 2.777  | 2.688 | Prss16        | 3.360 |
| Sdc4          | 0.000 | 2.121 | 4.748  | 6.870 | 4.701  | 4.806  | 4.738  | 6.906  | 6.834 | Sash1         | 3.359 |
| Rhbdf2        | 0.000 | 2.121 | 0.593  | 2.714 | 0.502  | 0.602  | 0.674  | 2.695  | 2.733 | Sdc4          | 3.351 |
| Mlxipl        | 0.001 | 2.119 | 5.825  | 7.944 | 6.092  | 5.615  | 5.768  | 7.914  | 7.974 | Gm26912       | 3.349 |
| Fmn1          | 0.001 | 2.119 | -0.023 | 2.095 | -0.174 | -0.102 | 0.206  | 1.978  | 2.213 | Rhbdf2        | 3.346 |
| Kcnk13        | 0.002 | 2.117 | 0.012  | 2.129 | 0.082  | 0.249  | -0.294 | 2.092  | 2.166 | Sh3bgr        | 3.343 |
| Mir99b        | 0.009 | 2.116 | 0.000  | 2.116 | 0.000  | 0.000  | 0.000  | 2.581  | 1.651 | Rsph4a        | 3.337 |
| Kalrn         | 0.001 | 2.115 | -0.967 | 1.148 | -0.832 | -0.853 | -1.217 | 1.140  | 1.156 | Plekhg1       | 3.337 |
| Zfp503        | 0.006 | 2.111 | 1.204  | 3.314 | 1.340  | 1.320  | 0.951  | 2.979  | 3.650 | Sowahb        | 3.334 |
| Gna14         | 0.000 | 2.110 | -0.292 | 1.818 | -0.246 | -0.223 | -0.409 | 1.950  | 1.686 | Gna14         | 3.329 |
| Aldh3b1       | 0.003 | 2.109 | 2.235  | 4.345 | 2.329  | 2.283  | 2.094  | 4.063  | 4.626 | Fmn1          | 3.328 |
| Zfp36l2       | 0.000 | 2.107 | 3.987  | 6.094 | 4.086  | 4.015  | 3.860  | 6.051  | 6.138 | Nrip1         | 3.308 |
| Gm26912       | 0.004 | 2.105 | -0.949 | 1.156 | -0.800 | -1.209 | -0.838 | 0.877  | 1.436 | Mlxipl        | 3.303 |
| Nrip1         | 0.001 | 2.104 | 1.321  | 3.426 | 1.341  | 1.429  | 1.194  | 3.295  | 3.556 | Zfp36l2       | 3.302 |
| Sowahb        | 0.001 | 2.100 | 2.703  | 4.803 | 2.666  | 2.786  | 2.657  | 5.022  | 4.585 | Kalrn         | 3.300 |
| Ifih1         | 0.008 | 2.099 | 0.665  | 2.764 | 0.838  | 0.214  | 0.945  | 2.960  | 2.568 | Aass          | 3.287 |
| Dact3         | 0.006 | 2.097 | 0.047  | 2.144 | 0.089  | 0.433  | -0.382 | 2.111  | 2.178 | Kcnk13        | 3.286 |
| Aass          | 0.001 | 2.095 | 3.332  | 5.427 | 3.194  | 3.336  | 3.467  | 5.594  | 5.261 | Lsmem2        | 3.284 |
| Micall2       | 0.004 | 2.095 | -0.422 | 1.672 | -0.546 | -0.336 | -0.385 | 1.328  | 2.016 | Rdh16f2       | 3.278 |
| Dnah8         | 0.001 | 2.092 | 3.676  | 5.768 | 3.603  | 3.851  | 3.573  | 5.670  | 5.865 | Csrnp1        | 3.277 |
| Tmlhe         | 0.001 | 2.088 | 1.586  | 3.674 | 1.680  | 1.396  | 1.682  | 3.744  | 3.604 | Dnah8         | 3.257 |
| Rsph4a        | 0.003 | 2.086 | 1.196  | 3.282 | 1.174  | 1.132  | 1.283  | 2.975  | 3.589 | Tmlhe         | 3.239 |
| Mir6905       | 0.001 | 2.085 | -0.101 | 1.985 | -0.302 | 0.000  | 0.000  | 1.996  | 1.973 | Pik3c2g       | 3.235 |
| Lsmem2        | 0.002 | 2.082 | 0.141  | 2.223 | 0.306  | 0.070  | 0.047  | 1.974  | 2.473 | Mapk12        | 3.232 |
| E030022l16Rik | 0.004 | 2.082 | 0.303  | 2.385 | 0.481  | -0.088 | 0.515  | 2.486  | 2.284 | Mir6905       | 3.224 |
| F2r           | 0.001 | 2.080 | 1.529  | 3.609 | 1.463  | 1.366  | 1.757  | 3.527  | 3.691 | Ifih1         | 3.222 |
| Mapk12        | 0.001 | 2.079 | -0.467 | 1.612 | -0.607 | -0.486 | -0.307 | 1.461  | 1.763 | F2r           | 3.208 |
| Gm38329       | 0.002 | 2.075 | 0.401  | 2.477 | 0.549  | 0.084  | 0.571  | 2.387  | 2.566 | Bcl2l11       | 3.193 |
| H2-T-ps       | 0.010 | 2.074 | 1.091  | 3.165 | 0.626  | 1.482  | 1.164  | 3.351  | 2.978 | Ddo           | 3.190 |
| Rdh16f2       | 0.003 | 2.072 | 0.029  | 2.101 | -0.085 | 0.062  | 0.111  | 1.820  | 2.382 | Gm38329       | 3.173 |
| Bcl2l11       | 0.001 | 2.068 | 1.274  | 3.343 | 1.332  | 1.378  | 1.114  | 3.235  | 3.451 | E030022l16Rik | 3.171 |
| Plekhg2       | 0.001 | 2.068 | -0.298 | 1.770 | -0.245 | -0.551 | -0.099 | 1.748  | 1.791 | Dact3         | 3.170 |
| Mexis         | 0.007 | 2.062 | -0.508 | 1.553 | -0.429 | -0.140 | -0.957 | 1.470  | 1.636 | Plekhg2       | 3.159 |
| Plaat3        | 0.001 | 2.059 | 1.491  | 3.550 | 1.615  | 1.263  | 1.595  | 3.625  | 3.475 | Jup           | 3.156 |
| Jup           | 0.000 | 2.057 | 2.955  | 5.013 | 3.072  | 2.938  | 2.856  | 4.982  | 5.044 | Plaat3        | 3.146 |
| Syde2         | 0.002 | 2.054 | 0.756  | 2.810 | 0.974  | 0.809  | 0.486  | 2.791  | 2.830 | Creg2         | 3.144 |
| Csrnp1        | 0.005 | 2.053 | 3.637  | 5.690 | 3.691  | 3.610  | 3.609  | 6.048  | 5.331 | Gm31373       | 3.132 |
| Gm31373       | 0.001 | 2.047 | 3.182  | 5.228 | 3.244  | 2.988  | 3.312  | 5.088  | 5.369 | H2-T-ps       | 3.125 |
| Gast          | 0.009 | 2.045 | 0.272  | 2.317 | -0.211 | 0.562  | 0.464  | 2.489  | 2.144 | Trmt9b        | 3.116 |
| Trim47        | 0.002 | 2.040 | -0.749 | 1.290 | -1.005 | -0.720 | -0.523 | 1.151  | 1.429 | Syde2         | 3.113 |
| Creg2         | 0.001 | 2.039 | 1.179  | 3.218 | 1.299  | 1.157  | 1.081  | 3.010  | 3.426 | Rin2          | 3.100 |
| Trmt9b        | 0.007 | 2.032 | 1.725  | 3.757 | 1.406  | 1.980  | 1.788  | 3.467  | 4.046 | Oas2          | 3.096 |

|               |       |       |        |       |        |        |        |       |       |               |       |
|---------------|-------|-------|--------|-------|--------|--------|--------|-------|-------|---------------|-------|
| Ddo           | 0.005 | 2.027 | 1.752  | 3.779 | 1.658  | 1.717  | 1.882  | 3.425 | 4.134 | Trim47        | 3.092 |
| Eps8l2        | 0.002 | 2.023 | 2.306  | 4.329 | 2.514  | 2.098  | 2.307  | 4.196 | 4.462 | Mexis         | 3.072 |
| Rin2          | 0.002 | 2.022 | 0.348  | 2.370 | 0.262  | 0.498  | 0.283  | 2.145 | 2.595 | Sbk1          | 3.063 |
| Sbk1          | 0.001 | 2.021 | 2.524  | 4.546 | 2.696  | 2.458  | 2.420  | 4.409 | 4.682 | Ralgapa2      | 3.060 |
| 5530401A14Rik | 0.007 | 2.018 | -0.089 | 1.929 | -0.095 | -0.487 | 0.316  | 1.875 | 1.983 | Pros1         | 3.057 |
| Erf           | 0.001 | 2.017 | 2.774  | 4.792 | 2.915  | 2.727  | 2.681  | 4.907 | 4.676 | Eps8l2        | 3.054 |
| Ttc23         | 0.001 | 2.016 | -0.034 | 1.982 | -0.072 | 0.172  | -0.201 | 1.989 | 1.975 | Erf           | 3.051 |
| Slc12a4       | 0.000 | 2.012 | 1.572  | 3.584 | 1.695  | 1.403  | 1.617  | 3.540 | 3.627 | Gast          | 3.047 |
| Pros1         | 0.001 | 2.011 | 4.005  | 6.016 | 3.959  | 4.076  | 3.978  | 5.842 | 6.189 | Crim1         | 3.041 |
| Crim1         | 0.000 | 2.008 | 0.540  | 2.548 | 0.516  | 0.514  | 0.591  | 2.402 | 2.694 | Ttc23         | 3.021 |
| Acta1         | 0.001 | 2.008 | 0.099  | 2.106 | 0.242  | -0.100 | 0.153  | 2.110 | 2.102 | Slc12a4       | 3.020 |
| Nfatc1        | 0.000 | 2.006 | 1.788  | 3.793 | 1.871  | 1.730  | 1.762  | 3.849 | 3.737 | Slc25a24      | 3.015 |
| Slc25a24      | 0.001 | 2.004 | 1.763  | 3.767 | 1.559  | 1.855  | 1.876  | 3.607 | 3.926 | Nfatc1        | 3.015 |
| Ralgapa2      | 0.002 | 2.001 | 2.212  | 4.213 | 2.165  | 2.289  | 2.180  | 3.965 | 4.461 | Mettl27       | 3.009 |
| Cebpb         | 0.000 | 2.001 | 4.300  | 6.301 | 4.402  | 4.268  | 4.229  | 6.381 | 6.222 | Cebpb         | 3.005 |
| Gm10382       | 0.007 | 1.997 | 3.510  | 5.508 | 3.806  | 3.077  | 3.648  | 5.407 | 5.608 | Acta1         | 3.001 |
| Slc12a7       | 0.000 | 1.996 | 2.949  | 4.945 | 3.124  | 2.899  | 2.826  | 4.913 | 4.977 | H2-T23        | 2.995 |
| Zc3h12a       | 0.005 | 1.991 | -0.101 | 1.890 | -0.456 | 0.204  | -0.051 | 2.025 | 1.755 | Prcp          | 2.975 |
| Il15ra        | 0.000 | 1.989 | 1.274  | 3.263 | 1.160  | 1.212  | 1.451  | 3.231 | 3.295 | Slc12a7       | 2.974 |
| Mapk15        | 0.004 | 1.981 | 3.933  | 5.915 | 4.285  | 3.664  | 3.851  | 5.813 | 6.016 | Il15ra        | 2.955 |
| Prcp          | 0.001 | 1.981 | 0.165  | 2.146 | 0.144  | 0.222  | 0.127  | 1.972 | 2.319 | 5530401A14Rik | 2.949 |
| Oas2          | 0.007 | 1.980 | 0.319  | 2.299 | 0.351  | 0.297  | 0.309  | 2.699 | 1.899 | Kcnab3        | 2.924 |
| Mettl27       | 0.004 | 1.979 | 1.472  | 3.451 | 1.511  | 1.595  | 1.310  | 3.162 | 3.741 | Zc3h12a       | 2.924 |
| Kcnh8         | 0.006 | 1.978 | -0.374 | 1.604 | -0.117 | -0.216 | -0.790 | 1.526 | 1.682 | Gm10382       | 2.913 |
| 4930447F24Rik | 0.004 | 1.975 | -0.515 | 1.460 | -0.267 | -0.857 | -0.421 | 1.353 | 1.567 | Ighd3-2       | 2.899 |
| Bid           | 0.008 | 1.971 | 0.135  | 2.106 | -0.059 | 0.604  | -0.140 | 2.158 | 2.053 | Mapk15        | 2.893 |
| Tnfsfm13      | 0.002 | 1.967 | -1.009 | 0.958 | -0.906 | -1.304 | -0.817 | 0.977 | 0.940 | Fam83b        | 2.892 |
| Rnasel        | 0.004 | 1.965 | -0.231 | 1.734 | -0.566 | -0.050 | -0.077 | 1.568 | 1.900 | 4930447F24Rik | 2.885 |
| Fam83b        | 0.001 | 1.964 | -0.571 | 1.393 | -0.479 | -0.753 | -0.480 | 1.312 | 1.474 | C2cd4b        | 2.882 |
| Gm3946        | 0.003 | 1.964 | 0.802  | 2.766 | 1.106  | 0.604  | 0.695  | 2.614 | 2.917 | Rnasel        | 2.880 |
| 5330439M10Rik | 0.003 | 1.964 | 3.572  | 5.536 | 3.267  | 3.640  | 3.810  | 5.417 | 5.655 | Wbscr25       | 2.879 |
| H2-T23        | 0.006 | 1.963 | 3.067  | 5.030 | 3.247  | 2.946  | 3.007  | 5.375 | 4.685 | Gm3946        | 2.876 |
| Tekt2         | 0.005 | 1.962 | 0.965  | 2.927 | 1.125  | 0.594  | 1.177  | 2.796 | 3.059 | Rab17         | 2.874 |
| Igsf9         | 0.002 | 1.956 | -0.477 | 1.479 | -0.234 | -0.685 | -0.512 | 1.377 | 1.581 | Spry1         | 2.874 |
| Tenm3         | 0.006 | 1.956 | 3.519  | 5.475 | 3.384  | 3.924  | 3.248  | 5.344 | 5.605 | Tnfsfm13      | 2.870 |
| C2cd4b        | 0.002 | 1.953 | 6.458  | 8.411 | 6.543  | 6.242  | 6.589  | 8.592 | 8.231 | Kcnh8         | 2.868 |
| Ighd3-2       | 0.001 | 1.953 | 0.000  | 1.953 | 0.000  | 0.000  | 0.000  | 2.125 | 1.780 | 5330439M10Rik | 2.867 |
| Wbscr25       | 0.007 | 1.951 | -0.854 | 1.097 | -0.973 | -1.056 | -0.533 | 0.832 | 1.361 | Gm16170       | 2.858 |
| Gm29010       | 0.001 | 1.950 | 0.996  | 2.947 | 0.756  | 1.190  | 1.043  | 3.019 | 2.874 | Igsf9         | 2.858 |
| Foxp2         | 0.001 | 1.950 | 0.929  | 2.879 | 0.808  | 1.157  | 0.822  | 2.803 | 2.955 | Tekt2         | 2.850 |
| Spry1         | 0.003 | 1.948 | -0.150 | 1.798 | -0.285 | -0.245 | 0.081  | 1.586 | 2.010 | Ush2a         | 2.850 |
| Ush2a         | 0.000 | 1.947 | 2.268  | 4.215 | 2.211  | 2.196  | 2.398  | 4.162 | 4.267 | Pwwp3b        | 2.849 |
| Kcnab3        | 0.003 | 1.947 | 3.169  | 5.116 | 3.154  | 3.117  | 3.236  | 4.838 | 5.393 | Dgkz          | 2.847 |
| Kremen1       | 0.001 | 1.945 | 3.397  | 5.342 | 3.269  | 3.593  | 3.329  | 5.319 | 5.365 | Foxp2         | 2.845 |
| Tsku          | 0.001 | 1.943 | 0.781  | 2.724 | 0.728  | 0.674  | 0.941  | 2.803 | 2.645 | Gm29010       | 2.840 |
| Dgkz          | 0.001 | 1.942 | 3.701  | 5.643 | 3.694  | 3.827  | 3.583  | 5.519 | 5.768 | Tsku          | 2.838 |
| Dbi           | 0.000 | 1.941 | 4.314  | 6.254 | 4.393  | 4.352  | 4.196  | 6.232 | 6.277 | Dbi           | 2.833 |
| Pwwp3b        | 0.001 | 1.940 | 1.913  | 3.853 | 1.885  | 2.013  | 1.842  | 3.715 | 3.991 | Kremen1       | 2.832 |
| Gm16170       | 0.003 | 1.936 | -0.579 | 1.357 | -0.374 | -0.683 | -0.680 | 1.122 | 1.593 | Bid           | 2.815 |
| Phgdh         | 0.002 | 1.936 | 4.184  | 6.120 | 4.104  | 3.975  | 4.474  | 6.176 | 6.065 | Prex1         | 2.815 |
| Tmem37        | 0.004 | 1.935 | 1.237  | 3.172 | 1.600  | 1.051  | 1.060  | 3.220 | 3.124 | Tenm3         | 2.814 |
| Prex1         | 0.000 | 1.933 | 1.783  | 3.716 | 1.815  | 1.675  | 1.859  | 3.755 | 3.676 | Rhoc          | 2.804 |
| Dcbld1        | 0.001 | 1.933 | -0.592 | 1.341 | -0.511 | -0.838 | -0.427 | 1.301 | 1.381 | Trim6         | 2.802 |
| Coro6         | 0.004 | 1.930 | -1.054 | 0.875 | -0.974 | -0.827 | -1.362 | 0.719 | 1.032 | Itpr3         | 2.798 |
| Ptprg         | 0.007 | 1.926 | -0.227 | 1.699 | -0.083 | -0.658 | 0.059  | 1.618 | 1.780 | Cdc14b        | 2.792 |
| Cdc14b        | 0.000 | 1.926 | 3.892  | 5.818 | 3.818  | 4.028  | 3.831  | 5.862 | 5.773 | Dcbld1        | 2.791 |
| Itpr3         | 0.000 | 1.923 | 3.099  | 5.023 | 3.158  | 3.066  | 3.073  | 4.939 | 5.106 | Phgdh         | 2.787 |
| Rhoc          | 0.003 | 1.922 | 2.548  | 4.470 | 2.602  | 2.326  | 2.717  | 4.263 | 4.677 | Coro6         | 2.787 |
| Esyt3         | 0.005 | 1.918 | -0.459 | 1.460 | -0.206 | -0.335 | -0.835 | 1.363 | 1.557 | Caskin2       | 2.783 |
| Caskin2       | 0.000 | 1.917 | 2.679  | 4.596 | 2.704  | 2.764  | 2.568  | 4.481 | 4.711 | Tmem37        | 2.764 |
| Gm49894       | 0.008 | 1.916 | -1.097 | 0.819 | -0.727 | -1.202 | -1.361 | 0.571 | 1.067 | Orai2         | 2.762 |
| Cnp           | 0.001 | 1.913 | 2.238  | 4.152 | 2.342  | 2.015  | 2.357  | 4.073 | 4.231 | Gm49894       | 2.761 |
| Sema6c        | 0.008 | 1.900 | 0.471  | 2.372 | 0.511  | 0.785  | 0.118  | 2.160 | 2.583 | Cnp           | 2.751 |
| Rab17         | 0.009 | 1.900 | -0.296 | 1.603 | -0.378 | -0.330 | -0.181 | 2.011 | 1.195 | Pcsk4         | 2.741 |
| Col28a1       | 0.000 | 1.898 | -1.021 | 0.877 | -1.075 | -0.893 | -1.096 | 0.831 | 0.922 | Esyt3         | 2.725 |
| Pcsk4         | 0.005 | 1.897 | 4.208  | 6.105 | 4.392  | 3.938  | 4.293  | 5.872 | 6.339 | Ptprg         | 2.724 |

|               |       |       |        |        |        |        |        |        |        |               |       |
|---------------|-------|-------|--------|--------|--------|--------|--------|--------|--------|---------------|-------|
| Trim6         | 0.007 | 1.894 | -0.263 | 1.631  | -0.407 | -0.319 | -0.063 | 1.286  | 1.975  | Col28a1       | 2.721 |
| Slc8b1        | 0.003 | 1.893 | 0.259  | 2.153  | 0.219  | 0.049  | 0.509  | 2.011  | 2.294  | H2bu2         | 2.721 |
| Traf4         | 0.000 | 1.893 | 1.732  | 3.625  | 1.808  | 1.570  | 1.819  | 3.657  | 3.594  | Evpl          | 2.710 |
| Orai2         | 0.002 | 1.892 | 2.256  | 4.148  | 2.171  | 2.321  | 2.276  | 3.898  | 4.397  | Sema6c        | 2.707 |
| Amotl2        | 0.000 | 1.889 | 2.412  | 4.301  | 2.459  | 2.293  | 2.484  | 4.308  | 4.295  | Traf4         | 2.704 |
| Gm37592       | 0.004 | 1.888 | 0.712  | 2.601  | 0.869  | 0.395  | 0.873  | 2.440  | 2.761  | Slc8b1        | 2.700 |
| 5730521K06Rik | 0.001 | 1.887 | 1.267  | 3.154  | 1.107  | 1.245  | 1.450  | 3.168  | 3.141  | Amotl2        | 2.698 |
| Evpl          | 0.004 | 1.886 | 1.249  | 3.136  | 1.347  | 0.990  | 1.412  | 2.916  | 3.356  | Anxa9         | 2.697 |
| H2bu2         | 0.006 | 1.886 | 1.045  | 2.931  | 1.320  | 0.882  | 0.932  | 2.671  | 3.191  | Gm26739       | 2.688 |
| Anxa9         | 0.001 | 1.877 | -0.675 | 1.202  | -0.731 | -0.693 | -0.601 | 1.375  | 1.030  | Gm37592       | 2.681 |
| Cdk2          | 0.001 | 1.876 | -0.008 | 1.868  | 0.132  | -0.007 | -0.148 | 1.799  | 1.936  | 5730521K06Rik | 2.681 |
| Fat1          | 0.000 | 1.872 | 2.277  | 4.149  | 2.275  | 2.290  | 2.266  | 4.078  | 4.221  | Fat1          | 2.665 |
| Gm26739       | 0.005 | 1.872 | -0.911 | 0.961  | -0.911 | -0.693 | -1.129 | 0.709  | 1.212  | Cdk2          | 2.662 |
| Alcam         | 0.001 | 1.867 | 2.814  | 4.681  | 2.851  | 2.667  | 2.922  | 4.550  | 4.812  | Gm14403       | 2.660 |
| Irs2          | 0.001 | 1.866 | 5.738  | 7.604  | 5.740  | 5.618  | 5.857  | 7.768  | 7.441  | Irs2          | 2.660 |
| Mex3d         | 0.000 | 1.865 | 1.719  | 3.584  | 1.776  | 1.793  | 1.587  | 3.622  | 3.546  | Alcam         | 2.654 |
| F2rl1         | 0.001 | 1.864 | 2.977  | 4.842  | 2.891  | 3.177  | 2.864  | 4.835  | 4.848  | Gm26226       | 2.648 |
| Gm26226       | 0.001 | 1.861 | -0.105 | 1.756  | -0.031 | -0.036 | -0.249 | 1.589  | 1.922  | C2cd4c        | 2.647 |
| C2cd4c        | 0.001 | 1.861 | 3.109  | 4.969  | 3.125  | 3.193  | 3.008  | 4.816  | 5.122  | Vwa1          | 2.642 |
| Itgb5         | 0.000 | 1.860 | 3.604  | 5.464  | 3.560  | 3.576  | 3.677  | 5.440  | 5.488  | Mex3d         | 2.637 |
| Gm22098       | 0.004 | 1.854 | -0.518 | 1.336  | -0.582 | -0.172 | -0.800 | 1.301  | 1.371  | Dpy19l3       | 2.629 |
| Dpy19l3       | 0.001 | 1.854 | 1.804  | 3.658  | 1.697  | 1.949  | 1.768  | 3.825  | 3.492  | Itgb5         | 2.628 |
| Ang           | 0.000 | 1.852 | 4.575  | 6.427  | 4.512  | 4.712  | 4.502  | 6.515  | 6.339  | Rasal1        | 2.625 |
| Hdac1-ps      | 0.002 | 1.852 | -0.416 | 1.435  | -0.209 | -0.400 | -0.639 | 1.357  | 1.513  | F2rl1         | 2.623 |
| Vwa1          | 0.002 | 1.851 | 0.025  | 1.876  | 0.027  | -0.078 | 0.126  | 1.660  | 2.092  | Rab13         | 2.610 |
| Plekhh2       | 0.000 | 1.849 | 2.024  | 3.874  | 1.917  | 2.072  | 2.084  | 3.770  | 3.977  | Ang           | 2.608 |
| Tram2         | 0.002 | 1.848 | 0.672  | 2.520  | 0.610  | 0.928  | 0.477  | 2.571  | 2.469  | Plekhh2       | 2.608 |
| Arhgef2       | 0.000 | 1.848 | 3.126  | 4.974  | 3.193  | 2.998  | 3.186  | 4.909  | 5.038  | Gm13684       | 2.600 |
| Rab13         | 0.000 | 1.848 | 1.650  | 3.498  | 1.591  | 1.670  | 1.690  | 3.380  | 3.616  | Arhgef2       | 2.597 |
| Gm13684       | 0.000 | 1.847 | -0.383 | 1.465  | -0.273 | -0.384 | -0.491 | 1.566  | 1.364  | Slc20a2       | 2.592 |
| Rasal1        | 0.002 | 1.842 | -0.227 | 1.615  | -0.318 | -0.248 | -0.114 | 1.381  | 1.849  | Dab2ip        | 2.588 |
| Dab2ip        | 0.004 | 1.841 | 2.031  | 3.872  | 2.071  | 2.235  | 1.786  | 3.671  | 4.073  | Hdac1-ps      | 2.588 |
| Hspb6         | 0.000 | 1.840 | 3.828  | 5.668  | 3.887  | 3.731  | 3.866  | 5.597  | 5.738  | Hspb6         | 2.580 |
| Zbtb42        | 0.001 | 1.839 | 2.321  | 4.160  | 2.407  | 2.468  | 2.088  | 4.093  | 4.228  | Tram2         | 2.572 |
| 1700048M11Rik | 0.004 | 1.838 | 0.208  | 2.045  | 0.227  | -0.099 | 0.495  | 2.062  | 2.029  | Gm15638       | 2.561 |
| Slc20a2       | 0.001 | 1.836 | 2.643  | 4.479  | 2.536  | 2.724  | 2.667  | 4.299  | 4.658  | Zbtb42        | 2.559 |
| Gm15638       | 0.000 | 1.832 | -0.223 | 1.609  | -0.185 | -0.190 | -0.294 | 1.559  | 1.660  | Gm22098       | 2.557 |
| Lmo4          | 0.001 | 1.832 | 0.792  | 2.624  | 0.612  | 0.952  | 0.812  | 2.671  | 2.576  | Gm27399       | 2.552 |
| Gm27399       | 0.000 | 1.828 | 0.000  | 1.828  | 0.000  | 0.000  | 0.000  | 1.840  | 1.817  | Lmo4          | 2.545 |
| Gm2065        | 0.007 | 1.827 | 0.475  | 2.302  | 0.465  | 0.166  | 0.795  | 2.497  | 2.106  | Golm1         | 2.544 |
| Gm14403       | 0.009 | 1.827 | 2.525  | 4.352  | 2.382  | 2.663  | 2.530  | 4.733  | 3.970  | Gm23935       | 2.542 |
| mt-Te         | 0.002 | 1.826 | 1.311  | 3.137  | 1.304  | 1.129  | 1.501  | 3.017  | 3.257  | Ttyh3         | 2.542 |
| Golm1         | 0.000 | 1.825 | 3.093  | 4.918  | 3.038  | 3.112  | 3.129  | 4.979  | 4.857  | mt-Te         | 2.538 |
| Gm23935       | 0.003 | 1.825 | 9.723  | 11.548 | 9.537  | 9.949  | 9.683  | 11.718 | 11.377 | Gm17529       | 2.537 |
| Gm43462       | 0.001 | 1.824 | -0.216 | 1.608  | -0.148 | -0.386 | -0.115 | 1.540  | 1.675  | Gm43462       | 2.533 |
| n-R5s197      | 0.007 | 1.824 | 0.299  | 2.123  | -0.067 | 0.665  | 0.299  | 2.038  | 2.208  | 1700048M11Rik | 2.524 |
| Gm17529       | 0.006 | 1.820 | -0.527 | 1.294  | -0.244 | -0.743 | -0.593 | 1.519  | 1.068  | Gm2065        | 2.524 |
| Col7a1        | 0.001 | 1.819 | -0.877 | 0.942  | -0.843 | -1.091 | -0.697 | 0.972  | 0.911  | Col7a1        | 2.506 |
| Zfp36         | 0.001 | 1.817 | 6.561  | 8.378  | 6.650  | 6.321  | 6.712  | 8.369  | 8.387  | Mir6236       | 2.500 |
| Zfta          | 0.002 | 1.817 | 1.865  | 3.681  | 1.779  | 2.134  | 1.681  | 3.619  | 3.743  | Zfp36         | 2.499 |
| Gm48562       | 0.005 | 1.813 | 1.463  | 3.276  | 1.325  | 1.276  | 1.790  | 3.436  | 3.116  | Zfta          | 2.493 |
| Ttyh3         | 0.003 | 1.813 | 1.535  | 3.348  | 1.453  | 1.458  | 1.695  | 3.130  | 3.565  | Asap3         | 2.492 |
| Tmprss2       | 0.009 | 1.811 | 0.983  | 2.794  | 1.117  | 0.533  | 1.299  | 2.773  | 2.815  | Gm49216       | 2.491 |
| Slc16a2       | 0.009 | 1.809 | -0.564 | 1.245  | -0.164 | -0.962 | -0.566 | 1.197  | 1.293  | Gm48562       | 2.488 |
| Mir6236       | 0.003 | 1.805 | 9.544  | 11.350 | 9.343  | 9.729  | 9.561  | 11.525 | 11.174 | Hspa2         | 2.475 |
| Gm49216       | 0.002 | 1.805 | 0.604  | 2.409  | 0.632  | 0.405  | 0.776  | 2.549  | 2.269  | n-R5s197      | 2.472 |
| Baz1a         | 0.001 | 1.801 | 1.181  | 2.982  | 1.072  | 1.122  | 1.350  | 2.998  | 2.966  | Baz1a         | 2.472 |
| Zfp217        | 0.000 | 1.799 | 0.788  | 2.587  | 0.843  | 0.631  | 0.889  | 2.553  | 2.621  | Zfp217        | 2.470 |
| Lonrf1        | 0.004 | 1.797 | 0.453  | 2.250  | 0.745  | 0.437  | 0.177  | 2.213  | 2.287  | Lgi4          | 2.464 |
| Cebpa         | 0.005 | 1.796 | 0.181  | 1.977  | -0.077 | 0.517  | 0.103  | 1.901  | 2.053  | Chrm4         | 2.459 |
| Asap3         | 0.002 | 1.795 | 1.553  | 3.349  | 1.689  | 1.464  | 1.507  | 3.163  | 3.535  | Ptger4        | 2.449 |
| Angptl7       | 0.006 | 1.793 | 5.956  | 7.748  | 5.831  | 6.325  | 5.711  | 7.835  | 7.662  | Lzts2         | 2.443 |
| Gm5900        | 0.009 | 1.793 | -0.583 | 1.210  | -0.401 | -0.991 | -0.357 | 1.382  | 1.037  | Agrn          | 2.440 |
| Ptger4        | 0.001 | 1.789 | 0.952  | 2.742  | 0.772  | 0.994  | 1.090  | 2.832  | 2.652  | ErbB3         | 2.437 |
| Chrm4         | 0.000 | 1.788 | 2.022  | 3.810  | 2.022  | 2.068  | 1.975  | 3.716  | 3.903  | Lonrf1        | 2.432 |
| Agrn          | 0.002 | 1.787 | 2.188  | 3.976  | 2.314  | 1.967  | 2.285  | 4.077  | 3.875  | Tmprss2       | 2.425 |

|               |       |       |        |        |        |        |        |        |        |               |       |
|---------------|-------|-------|--------|--------|--------|--------|--------|--------|--------|---------------|-------|
| Hspa2         | 0.002 | 1.785 | 3.985  | 5.770  | 4.011  | 4.056  | 3.886  | 5.570  | 5.969  | Cebpa         | 2.425 |
| Erbp3         | 0.001 | 1.784 | -0.176 | 1.608  | -0.370 | -0.108 | -0.051 | 1.502  | 1.714  | Gm5900        | 2.424 |
| Lgi4          | 0.005 | 1.778 | -0.974 | 0.804  | -0.843 | -1.197 | -0.881 | 0.548  | 1.061  | Slc16a2       | 2.418 |
| Lzts2         | 0.002 | 1.770 | 4.083  | 5.853  | 4.078  | 4.169  | 4.000  | 5.646  | 6.060  | Angptl7       | 2.411 |
| Junb          | 0.002 | 1.770 | 8.552  | 10.321 | 8.714  | 8.283  | 8.658  | 10.381 | 10.262 | Ffar2         | 2.408 |
| Pkhd1         | 0.000 | 1.769 | 1.269  | 3.038  | 1.271  | 1.378  | 1.157  | 3.066  | 3.009  | Paxip1        | 2.405 |
| 2510016D11Rik | 0.002 | 1.766 | 2.980  | 4.746  | 3.223  | 2.863  | 2.855  | 4.629  | 4.864  | Pkhd1         | 2.402 |
| Arl4d         | 0.002 | 1.765 | 3.676  | 5.441  | 3.534  | 3.576  | 3.918  | 5.459  | 5.423  | Fzd4          | 2.392 |
| Grk4          | 0.007 | 1.762 | 0.788  | 2.549  | 0.677  | 1.124  | 0.561  | 2.351  | 2.748  | 2510016D11Rik | 2.388 |
| Fbxw18        | 0.000 | 1.761 | 4.563  | 6.324  | 4.490  | 4.587  | 4.612  | 6.326  | 6.323  | Fbxw18        | 2.387 |
| Paxip1        | 0.001 | 1.760 | 4.069  | 5.830  | 4.023  | 4.078  | 4.108  | 5.677  | 5.982  | Catsperd      | 2.386 |
| Fzd4          | 0.001 | 1.759 | 0.324  | 2.083  | 0.361  | 0.394  | 0.217  | 2.202  | 1.964  | Junb          | 2.384 |
| Ier2          | 0.002 | 1.759 | 8.269  | 10.028 | 8.377  | 8.026  | 8.404  | 9.994  | 10.063 | Cpt1a         | 2.380 |
| Catsperd      | 0.001 | 1.758 | -0.875 | 0.884  | -0.895 | -0.987 | -0.741 | 1.002  | 0.765  | Gm50256       | 2.375 |
| Ffar2         | 0.004 | 1.757 | 4.963  | 6.721  | 5.019  | 4.765  | 5.106  | 6.486  | 6.956  | Arl4d         | 2.375 |
| Cpt1a         | 0.000 | 1.755 | 3.180  | 4.935  | 3.119  | 3.265  | 3.157  | 4.836  | 5.035  | Grk4          | 2.374 |
| Gm16091       | 0.009 | 1.751 | 1.777  | 3.528  | 1.342  | 1.970  | 2.020  | 3.632  | 3.424  | Abca1         | 2.371 |
| Gm50256       | 0.007 | 1.749 | 1.817  | 3.566  | 1.579  | 1.774  | 2.098  | 3.816  | 3.317  | Ier2          | 2.363 |
| Mansc1        | 0.004 | 1.742 | 2.847  | 4.589  | 2.727  | 2.717  | 3.099  | 4.403  | 4.776  | Mansc1        | 2.347 |
| Slc23a4       | 0.002 | 1.737 | 1.251  | 2.988  | 1.359  | 1.383  | 1.012  | 3.044  | 2.932  | Pik3c3        | 2.328 |
| Gm50012       | 0.000 | 1.736 | -0.052 | 1.684  | 0.040  | -0.178 | -0.018 | 1.643  | 1.726  | Gm50012       | 2.326 |
| Pik3c3        | 0.000 | 1.734 | 4.906  | 6.640  | 4.902  | 4.870  | 4.947  | 6.593  | 6.688  | Tfcp2l1       | 2.321 |
| Abca1         | 0.005 | 1.733 | 3.907  | 5.640  | 3.851  | 4.071  | 3.800  | 5.371  | 5.909  | Slc23a4       | 2.313 |
| Nbeal2        | 0.001 | 1.733 | 3.007  | 4.740  | 3.123  | 3.121  | 2.778  | 4.761  | 4.719  | Stard5        | 2.311 |
| Gm12299       | 0.002 | 1.731 | 0.404  | 2.136  | 0.476  | 0.162  | 0.575  | 2.060  | 2.211  | Atp5l         | 2.309 |
| Tfcp2l1       | 0.001 | 1.731 | 0.673  | 2.403  | 0.773  | 0.716  | 0.529  | 2.290  | 2.517  | Gm5824        | 2.308 |
| Itpr2         | 0.007 | 1.731 | 0.037  | 1.767  | 0.255  | 0.145  | -0.290 | 1.953  | 1.582  | Mir1943       | 2.305 |
| Rab43         | 0.000 | 1.727 | -0.831 | 0.896  | -0.961 | -0.687 | -0.846 | 0.913  | 0.880  | Itpr2         | 2.304 |
| Plekha7       | 0.000 | 1.724 | 0.416  | 2.140  | 0.557  | 0.324  | 0.368  | 2.188  | 2.093  | Nbeal2        | 2.303 |
| Tspan33       | 0.000 | 1.723 | 2.965  | 4.687  | 2.960  | 3.037  | 2.897  | 4.679  | 4.696  | Gm16091       | 2.302 |
| Pde4d         | 0.009 | 1.722 | 0.078  | 1.800  | 0.044  | -0.216 | 0.406  | 1.594  | 2.007  | Rab43         | 2.301 |
| Stard5        | 0.002 | 1.721 | 2.114  | 3.835  | 2.016  | 2.040  | 2.287  | 3.650  | 4.020  | Gm12299       | 2.301 |
| Mir1943       | 0.001 | 1.718 | 2.962  | 4.680  | 2.959  | 3.048  | 2.879  | 4.521  | 4.839  | Tspan33       | 2.298 |
| Mir7048       | 0.010 | 1.717 | 1.367  | 3.084  | 0.969  | 1.379  | 1.751  | 3.075  | 3.092  | Plekha7       | 2.298 |
| Srgap1        | 0.000 | 1.713 | 0.832  | 2.545  | 0.860  | 0.865  | 0.770  | 2.548  | 2.541  | Pde4d         | 2.281 |
| Fhod1         | 0.001 | 1.713 | 1.163  | 2.875  | 1.290  | 1.214  | 0.983  | 2.903  | 2.848  | Srgap1        | 2.276 |
| Adora1        | 0.007 | 1.712 | 1.669  | 3.381  | 1.587  | 2.048  | 1.373  | 3.412  | 3.350  | Prdm11        | 2.269 |
| Slain1os      | 0.001 | 1.710 | -0.633 | 1.077  | -0.771 | -0.661 | -0.466 | 1.066  | 1.089  | Fhod1         | 2.265 |
| Top1mt        | 0.001 | 1.708 | -0.909 | 0.799  | -1.082 | -0.901 | -0.744 | 0.884  | 0.715  | Slain1os      | 2.259 |
| Prdm11        | 0.000 | 1.708 | -0.667 | 1.041  | -0.691 | -0.745 | -0.564 | 0.942  | 1.140  | Top1mt        | 2.258 |
| Atp5l         | 0.004 | 1.706 | 1.794  | 3.500  | 1.843  | 1.869  | 1.670  | 3.243  | 3.757  | Nde1          | 2.258 |
| Nde1          | 0.000 | 1.706 | 2.791  | 4.497  | 2.673  | 2.851  | 2.849  | 4.485  | 4.509  | Cas2          | 2.257 |
| Gm5824        | 0.003 | 1.705 | -0.546 | 1.158  | -0.505 | -0.564 | -0.571 | 0.909  | 1.408  | Kdm7a         | 2.248 |
| Hdc           | 0.002 | 1.703 | -0.926 | 0.777  | -0.814 | -0.789 | -1.174 | 0.876  | 0.678  | Cacnb1        | 2.243 |
| Cas2          | 0.000 | 1.700 | 2.426  | 4.127  | 2.445  | 2.392  | 2.442  | 4.025  | 4.228  | Hdc           | 2.240 |
| Myo5b         | 0.000 | 1.694 | 2.694  | 4.389  | 2.712  | 2.756  | 2.615  | 4.370  | 4.408  | Phf21b        | 2.236 |
| Phf21b        | 0.000 | 1.694 | 4.255  | 5.949  | 4.270  | 4.263  | 4.231  | 5.931  | 5.967  | Myo5b         | 2.234 |
| Def6          | 0.001 | 1.694 | 0.497  | 2.191  | 0.614  | 0.313  | 0.565  | 2.185  | 2.198  | Numbl         | 2.233 |
| Kdm7a         | 0.001 | 1.694 | 3.230  | 4.924  | 3.180  | 3.191  | 3.321  | 4.777  | 5.071  | Zfp568        | 2.228 |
| Gm44545       | 0.003 | 1.694 | 0.692  | 2.386  | 0.808  | 0.395  | 0.873  | 2.364  | 2.407  | Pon2          | 2.226 |
| 4930405N21Rik | 0.004 | 1.693 | 1.020  | 2.713  | 0.686  | 1.237  | 1.135  | 2.704  | 2.722  | E130308A19Rik | 2.225 |
| E130308A19Rik | 0.002 | 1.692 | 0.489  | 2.181  | 0.609  | 0.581  | 0.276  | 2.065  | 2.298  | Dgka          | 2.223 |
| Nfia          | 0.001 | 1.692 | -0.047 | 1.645  | -0.217 | 0.089  | -0.014 | 1.636  | 1.653  | Def6          | 2.222 |
| Pon2          | 0.002 | 1.688 | 2.878  | 4.566  | 2.724  | 2.874  | 3.036  | 4.709  | 4.424  | Akr1b8        | 2.219 |
| Dgka          | 0.002 | 1.688 | 2.441  | 4.129  | 2.508  | 2.263  | 2.552  | 3.998  | 4.259  | Nfia          | 2.219 |
| Gm7160        | 0.001 | 1.687 | 3.042  | 4.729  | 3.133  | 3.153  | 2.841  | 4.648  | 4.810  | Nt5dc2        | 2.214 |
| Akr1b8        | 0.002 | 1.687 | 0.186  | 1.872  | 0.032  | 0.180  | 0.345  | 1.746  | 1.999  | Adora1        | 2.213 |
| Chrn1         | 0.003 | 1.685 | -0.273 | 1.413  | -0.524 | -0.024 | -0.270 | 1.328  | 1.497  | Ccdc120       | 2.211 |
| Zfp568        | 0.001 | 1.682 | 4.757  | 6.439  | 4.695  | 4.784  | 4.792  | 6.278  | 6.601  | Gm7160        | 2.209 |
| Ccdc120       | 0.001 | 1.682 | 2.301  | 3.983  | 2.346  | 2.383  | 2.174  | 3.876  | 4.090  | Mir7048       | 2.209 |
| Gm15473       | 0.002 | 1.675 | 0.030  | 1.705  | 0.268  | -0.108 | -0.071 | 1.623  | 1.787  | Gm44545       | 2.201 |
| Cacnb1        | 0.005 | 1.674 | 2.108  | 3.782  | 2.202  | 2.115  | 2.007  | 3.508  | 4.055  | Vangl2        | 2.201 |
| Cryba2        | 0.001 | 1.673 | 3.718  | 5.391  | 3.864  | 3.610  | 3.679  | 5.265  | 5.517  | Gm25827       | 2.196 |
| Vangl2        | 0.002 | 1.673 | -0.319 | 1.354  | -0.271 | -0.489 | -0.196 | 1.175  | 1.533  | Cryba2        | 2.193 |
| Parm1         | 0.000 | 1.672 | 1.422  | 3.094  | 1.327  | 1.496  | 1.441  | 3.187  | 3.001  | 4930405N21Rik | 2.191 |
| Numbl         | 0.003 | 1.672 | 1.391  | 3.063  | 1.459  | 1.310  | 1.403  | 2.808  | 3.317  | Parm1         | 2.189 |

|               |       |       |        |       |        |        |        |       |       |               |       |
|---------------|-------|-------|--------|-------|--------|--------|--------|-------|-------|---------------|-------|
| Nt5dc2        | 0.002 | 1.671 | 3.347  | 5.018 | 3.390  | 3.277  | 3.374  | 4.817 | 5.220 | Chrnbl        | 2.189 |
| Gm13717       | 0.000 | 1.671 | 0.000  | 1.671 | 0.000  | 0.000  | 0.000  | 1.614 | 1.728 | Gm13717       | 2.187 |
| Chd7          | 0.002 | 1.671 | 4.258  | 5.929 | 4.247  | 4.097  | 4.432  | 6.040 | 5.818 | Speg          | 2.182 |
| Arid3a        | 0.001 | 1.670 | 2.478  | 4.148 | 2.278  | 2.561  | 2.596  | 4.161 | 4.135 | Chd7          | 2.179 |
| 1700017B05Rik | 0.003 | 1.669 | 1.994  | 3.663 | 2.070  | 2.155  | 1.759  | 3.531 | 3.795 | Gm15473       | 2.176 |
| Galnt10       | 0.000 | 1.665 | 4.038  | 5.703 | 3.928  | 4.178  | 4.008  | 5.676 | 5.730 | 1700017B05Rik | 2.171 |
| Gm38158       | 0.005 | 1.664 | 0.942  | 2.606 | 0.744  | 1.292  | 0.789  | 2.627 | 2.585 | Arid3a        | 2.167 |
| Speg          | 0.001 | 1.664 | 2.151  | 3.815 | 2.094  | 2.230  | 2.128  | 3.955 | 3.675 | Galnt10       | 2.163 |
| Gm42502       | 0.006 | 1.663 | -0.157 | 1.505 | -0.355 | 0.193  | -0.310 | 1.591 | 1.420 | Ppp1r3d       | 2.155 |
| Trnp1         | 0.001 | 1.660 | 4.521  | 6.181 | 4.513  | 4.692  | 4.358  | 6.136 | 6.226 | Pim1          | 2.154 |
| Bspry         | 0.000 | 1.660 | 3.138  | 4.797 | 3.046  | 3.085  | 3.283  | 4.760 | 4.835 | Bspry         | 2.152 |
| Ppp1r3d       | 0.001 | 1.659 | 2.120  | 3.779 | 1.974  | 2.261  | 2.125  | 3.685 | 3.873 | Trnp1         | 2.147 |
| Gm25827       | 0.003 | 1.659 | -0.044 | 1.615 | 0.000  | 0.000  | -0.132 | 1.384 | 1.846 | Gm26887       | 2.141 |
| Pim1          | 0.000 | 1.655 | 2.318  | 3.973 | 2.398  | 2.267  | 2.291  | 4.074 | 3.873 | Klhl36        | 2.139 |
| Fam221a       | 0.002 | 1.654 | 0.504  | 2.158 | 0.513  | 0.309  | 0.690  | 2.055 | 2.262 | Fam221a       | 2.138 |
| Cotl1         | 0.001 | 1.650 | 5.164  | 6.814 | 5.310  | 5.147  | 5.035  | 6.867 | 6.761 | Zfp870        | 2.132 |
| Klhl36        | 0.000 | 1.649 | 3.454  | 5.103 | 3.546  | 3.445  | 3.372  | 5.016 | 5.191 | Cotl1         | 2.131 |
| Ubtd1         | 0.002 | 1.648 | 2.260  | 3.908 | 2.061  | 2.471  | 2.246  | 3.885 | 3.931 | Rorc          | 2.127 |
| Gm11131       | 0.007 | 1.648 | -0.651 | 0.997 | -0.289 | -0.911 | -0.751 | 1.041 | 0.954 | Gm42502       | 2.123 |
| Zfp870        | 0.003 | 1.648 | 0.800  | 2.447 | 0.745  | 0.651  | 1.003  | 2.301 | 2.594 | lqcd          | 2.122 |
| Trim7         | 0.007 | 1.646 | 0.842  | 2.488 | 1.121  | 0.893  | 0.512  | 2.353 | 2.622 | Gm38158       | 2.122 |
| Afap1         | 0.001 | 1.641 | 0.268  | 1.909 | 0.365  | 0.122  | 0.317  | 1.818 | 2.001 | Gm45527       | 2.117 |
| lqcd          | 0.001 | 1.640 | -0.734 | 0.906 | -0.887 | -0.669 | -0.646 | 0.769 | 1.043 | Afap1         | 2.117 |
| Dusp6         | 0.003 | 1.637 | 2.368  | 4.006 | 2.307  | 2.202  | 2.596  | 3.861 | 4.151 | Ubtd1         | 2.113 |
| Gm13829       | 0.000 | 1.637 | 0.000  | 1.637 | 0.000  | 0.000  | 0.000  | 1.602 | 1.672 | Gm13829       | 2.111 |
| Efna2         | 0.002 | 1.636 | 1.536  | 3.173 | 1.498  | 1.390  | 1.722  | 3.034 | 3.312 | Efna2         | 2.109 |
| Gm26714       | 0.001 | 1.635 | -0.356 | 1.278 | -0.342 | -0.501 | -0.226 | 1.240 | 1.317 | Gm11339       | 2.106 |
| Shc2          | 0.001 | 1.634 | 4.340  | 5.974 | 4.355  | 4.446  | 4.221  | 5.869 | 6.080 | Dusp6         | 2.106 |
| Nynrin        | 0.004 | 1.634 | 1.623  | 3.257 | 1.837  | 1.697  | 1.337  | 3.221 | 3.293 | Shc2          | 2.105 |
| Gm26887       | 0.010 | 1.631 | -0.602 | 1.030 | -0.461 | -0.858 | -0.486 | 0.730 | 1.329 | Gm26714       | 2.096 |
| Clcn5         | 0.000 | 1.628 | 1.854  | 3.482 | 1.870  | 1.850  | 1.843  | 3.433 | 3.531 | Trim7         | 2.096 |
| Mir1938       | 0.009 | 1.627 | 2.183  | 3.810 | 1.991  | 2.594  | 1.965  | 3.729 | 3.891 | Clcn5         | 2.092 |
| Gm11339       | 0.007 | 1.627 | 1.714  | 3.340 | 1.935  | 1.727  | 1.480  | 3.096 | 3.585 | Sult1d1       | 2.084 |
| Ptges3l       | 0.001 | 1.627 | 0.202  | 1.828 | 0.034  | 0.304  | 0.268  | 1.852 | 1.805 | Gm11131       | 2.081 |
| Tpst2         | 0.000 | 1.624 | 4.975  | 6.599 | 5.078  | 4.890  | 4.957  | 6.570 | 6.629 | Rem2          | 2.080 |
| Pon3          | 0.000 | 1.623 | 2.301  | 3.924 | 2.262  | 2.281  | 2.360  | 3.947 | 3.901 | Pon3          | 2.080 |
| Rorc          | 0.007 | 1.620 | 3.574  | 5.194 | 3.630  | 3.674  | 3.419  | 4.905 | 5.484 | Tpst2         | 2.079 |
| Rem2          | 0.004 | 1.618 | 1.768  | 3.386 | 1.948  | 1.561  | 1.795  | 3.189 | 3.584 | Ptges3l       | 2.078 |
| Gucy2c        | 0.001 | 1.615 | 5.081  | 6.696 | 4.915  | 5.097  | 5.232  | 6.614 | 6.778 | Nynrin        | 2.072 |
| Gm47580       | 0.005 | 1.615 | -0.846 | 0.769 | -0.637 | -1.166 | -0.735 | 0.838 | 0.699 | D030028A08Rik | 2.069 |
| Sult1d1       | 0.003 | 1.614 | 1.618  | 3.232 | 1.773  | 1.536  | 1.545  | 3.443 | 3.020 | Gm47163       | 2.057 |
| Rras          | 0.007 | 1.613 | 2.771  | 4.384 | 2.639  | 3.107  | 2.566  | 4.257 | 4.511 | Gucy2c        | 2.055 |
| Ust           | 0.000 | 1.610 | 2.725  | 4.335 | 2.660  | 2.798  | 2.717  | 4.292 | 4.379 | Fcho1         | 2.055 |
| Gm47163       | 0.001 | 1.607 | 5.384  | 6.992 | 5.379  | 5.493  | 5.282  | 6.848 | 7.136 | Gm10499       | 2.053 |
| Gm45527       | 0.009 | 1.607 | -0.843 | 0.764 | -0.769 | -0.774 | -0.987 | 0.436 | 1.091 | Ust           | 2.052 |
| Midn          | 0.002 | 1.607 | 5.001  | 6.608 | 5.175  | 4.830  | 4.998  | 6.726 | 6.489 | Midn          | 2.041 |
| Gm10499       | 0.002 | 1.606 | -0.579 | 1.027 | -0.432 | -0.591 | -0.715 | 0.866 | 1.187 | Cyp2d22       | 2.041 |
| Cyp2d22       | 0.004 | 1.605 | 0.343  | 1.948 | 0.199  | 0.259  | 0.571  | 1.785 | 2.110 | Gm42755       | 2.037 |
| Glcc1         | 0.001 | 1.602 | 0.093  | 1.695 | -0.038 | 0.211  | 0.106  | 1.588 | 1.802 | Glcc1         | 2.037 |
| Egr3          | 0.001 | 1.602 | 1.666  | 3.268 | 1.755  | 1.468  | 1.775  | 3.349 | 3.187 | Mir1938       | 2.030 |
| Stard8        | 0.007 | 1.601 | -0.589 | 1.013 | -0.240 | -0.664 | -0.862 | 1.004 | 1.021 | Gm47580       | 2.028 |
| D030028A08Rik | 0.004 | 1.600 | 1.622  | 3.222 | 1.614  | 1.524  | 1.726  | 2.983 | 3.461 | Rras          | 2.028 |
| Gm3336        | 0.005 | 1.598 | -0.379 | 1.219 | -0.254 | -0.231 | -0.653 | 1.044 | 1.393 | Egr3          | 2.026 |
| Gm42755       | 0.002 | 1.597 | 3.930  | 5.527 | 3.791  | 3.946  | 4.054  | 5.359 | 5.695 | Zfp773        | 2.025 |
| Gm25219       | 0.010 | 1.596 | 0.991  | 2.587 | 0.631  | 1.193  | 1.150  | 2.403 | 2.772 | Gm3336        | 2.023 |
| Col9a2        | 0.001 | 1.589 | 2.068  | 3.657 | 2.102  | 2.146  | 1.956  | 3.544 | 3.770 | Rps2-ps9      | 2.020 |
| Cfap300       | 0.009 | 1.589 | -0.207 | 1.381 | -0.561 | 0.060  | -0.121 | 1.244 | 1.519 | Col9a2        | 2.013 |
| 9130230N09Rik | 0.006 | 1.588 | 0.240  | 1.827 | 0.542  | 0.035  | 0.143  | 1.962 | 1.693 | Onecut2       | 2.003 |
| Bhlhe40       | 0.000 | 1.587 | 4.284  | 5.871 | 4.309  | 4.192  | 4.352  | 5.890 | 5.851 | Gm25219       | 2.003 |
| Onecut2       | 0.001 | 1.586 | 0.158  | 1.744 | 0.316  | 0.039  | 0.118  | 1.622 | 1.865 | Bhlhe40       | 2.001 |
| Fcho1         | 0.007 | 1.584 | 0.737  | 2.322 | 0.736  | 0.874  | 0.603  | 2.023 | 2.621 | H2-K1         | 2.000 |
| Tlr3          | 0.003 | 1.584 | 0.700  | 2.284 | 0.873  | 0.804  | 0.423  | 2.291 | 2.277 | Tmtc3         | 1.995 |
| Rps2-ps9      | 0.005 | 1.582 | -0.748 | 0.834 | -0.934 | -0.617 | -0.693 | 1.064 | 0.604 | Gm43031       | 1.993 |
| Lpar6         | 0.001 | 1.579 | 2.146  | 3.725 | 2.076  | 2.300  | 2.062  | 3.644 | 3.807 | Tnr           | 1.992 |
| H2-K1         | 0.002 | 1.577 | 6.674  | 8.250 | 6.796  | 6.609  | 6.616  | 8.427 | 8.073 | Lpar6         | 1.985 |
| Gm22637       | 0.002 | 1.576 | 0.462  | 2.038 | 0.490  | 0.263  | 0.634  | 1.981 | 2.095 | Stard8        | 1.984 |

|               |       |       |        |        |        |        |        |        |        |               |       |
|---------------|-------|-------|--------|--------|--------|--------|--------|--------|--------|---------------|-------|
| Inpp1         | 0.001 | 1.575 | 4.129  | 5.704  | 4.170  | 4.219  | 3.997  | 5.590  | 5.818  | 9130230N09Rik | 1.984 |
| Gm43031       | 0.001 | 1.575 | 0.795  | 2.370  | 0.900  | 0.782  | 0.704  | 2.529  | 2.211  | Inpp1         | 1.982 |
| Gm47817       | 0.009 | 1.572 | -0.410 | 1.162  | -0.303 | -0.770 | -0.156 | 1.026  | 1.297  | Cldn23        | 1.977 |
| Gm45774       | 0.003 | 1.571 | 0.217  | 1.788  | 0.202  | 0.412  | 0.036  | 1.628  | 1.947  | Cfap300       | 1.974 |
| Dtx1          | 0.006 | 1.570 | 0.309  | 1.879  | 0.322  | 0.539  | 0.066  | 1.704  | 2.053  | Actn3         | 1.972 |
| BC046401      | 0.006 | 1.569 | 0.685  | 2.254  | 1.008  | 0.641  | 0.406  | 2.207  | 2.302  | Gm45774       | 1.972 |
| Tjp3          | 0.002 | 1.567 | 2.679  | 4.246  | 2.753  | 2.794  | 2.488  | 4.339  | 4.152  | Tlr3          | 1.970 |
| Gm30934       | 0.009 | 1.567 | 1.732  | 3.299  | 1.649  | 1.521  | 2.026  | 3.069  | 3.528  | Gm22637       | 1.967 |
| Mdm1          | 0.001 | 1.566 | 5.074  | 6.640  | 5.151  | 4.946  | 5.126  | 6.745  | 6.535  | Gm30934       | 1.966 |
| A330023F24Rik | 0.000 | 1.566 | 1.799  | 3.365  | 1.694  | 1.798  | 1.906  | 3.341  | 3.388  | Pxylp1        | 1.965 |
| H2-Eb1        | 0.003 | 1.566 | 0.841  | 2.406  | 0.603  | 0.913  | 1.006  | 2.299  | 2.514  | Dtx1          | 1.964 |
| Pxylp1        | 0.001 | 1.563 | 3.214  | 4.778  | 3.233  | 3.134  | 3.276  | 4.907  | 4.648  | Gm17024       | 1.963 |
| Cldn23        | 0.002 | 1.562 | 3.238  | 4.800  | 3.311  | 3.183  | 3.221  | 4.607  | 4.993  | Mdm1          | 1.963 |
| Zfp773        | 0.009 | 1.562 | 0.076  | 1.638  | -0.015 | 0.065  | 0.179  | 1.969  | 1.307  | Fzd6          | 1.959 |
| Fzd6          | 0.002 | 1.559 | 2.837  | 4.396  | 2.899  | 2.705  | 2.906  | 4.561  | 4.230  | Tjp3          | 1.956 |
| Actn3         | 0.010 | 1.558 | -0.575 | 0.983  | -0.817 | -0.537 | -0.370 | 0.711  | 1.255  | A330023F24Rik | 1.956 |
| Tmtc3         | 0.006 | 1.557 | 4.245  | 5.803  | 4.193  | 4.343  | 4.199  | 5.525  | 6.080  | Klf11         | 1.948 |
| Gm47218       | 0.009 | 1.557 | 1.176  | 2.733  | 1.416  | 0.779  | 1.331  | 2.737  | 2.728  | H2-Eb1        | 1.948 |
| Nectin2       | 0.001 | 1.557 | 4.205  | 5.762  | 4.124  | 4.298  | 4.194  | 5.648  | 5.876  | Nectin2       | 1.947 |
| Klf11         | 0.001 | 1.554 | 3.917  | 5.471  | 3.927  | 3.890  | 3.933  | 5.340  | 5.602  | Zfp970        | 1.947 |
| Lamc2         | 0.001 | 1.554 | 1.622  | 3.175  | 1.534  | 1.740  | 1.590  | 3.253  | 3.098  | Gm47817       | 1.939 |
| Npas2         | 0.001 | 1.551 | 0.909  | 2.460  | 0.830  | 0.806  | 1.090  | 2.492  | 2.428  | Hmg20b        | 1.935 |
| Amotl1        | 0.000 | 1.551 | 2.774  | 4.325  | 2.728  | 2.737  | 2.858  | 4.304  | 4.347  | Lamc2         | 1.935 |
| Pbxip1        | 0.000 | 1.550 | 5.136  | 6.686  | 5.157  | 5.127  | 5.122  | 6.626  | 6.746  | Pbxip1        | 1.931 |
| Tmem132a      | 0.004 | 1.550 | 0.881  | 2.431  | 1.111  | 0.874  | 0.658  | 2.319  | 2.542  | Amotl1        | 1.928 |
| Efna1         | 0.000 | 1.548 | 1.155  | 2.703  | 1.119  | 1.100  | 1.247  | 2.689  | 2.718  | BC046401      | 1.926 |
| Gm17024       | 0.004 | 1.547 | 4.511  | 6.059  | 4.461  | 4.495  | 4.577  | 6.303  | 5.814  | Efna1         | 1.921 |
| Hmg20b        | 0.001 | 1.546 | 3.923  | 5.469  | 3.990  | 3.913  | 3.866  | 5.311  | 5.626  | Cyp46a1       | 1.920 |
| Tnr           | 0.009 | 1.545 | 0.366  | 1.910  | 0.376  | 0.280  | 0.441  | 1.577  | 2.243  | Npas2         | 1.919 |
| Gm48249       | 0.005 | 1.544 | 0.929  | 2.473  | 0.999  | 0.636  | 1.151  | 2.583  | 2.363  | Pkd1l3        | 1.917 |
| Irak3         | 0.001 | 1.543 | -0.022 | 1.522  | -0.039 | -0.131 | 0.105  | 1.441  | 1.602  | Nol4l         | 1.916 |
| Nol4l         | 0.001 | 1.537 | 2.724  | 4.261  | 2.732  | 2.714  | 2.727  | 4.119  | 4.404  | H3f3b         | 1.914 |
| Pkd1l3        | 0.001 | 1.537 | -0.302 | 1.235  | -0.373 | -0.310 | -0.222 | 1.074  | 1.396  | Irak3         | 1.913 |
| Scarb1        | 0.000 | 1.537 | 1.554  | 3.091  | 1.626  | 1.458  | 1.578  | 3.090  | 3.091  | Tmem132a      | 1.912 |
| mt-Nd6        | 0.003 | 1.537 | 10.725 | 12.262 | 10.735 | 10.500 | 10.942 | 12.317 | 12.207 | Nhs12         | 1.903 |
| Eif4ebp3      | 0.001 | 1.536 | 0.214  | 1.750  | 0.288  | 0.283  | 0.070  | 1.674  | 1.826  | Man1c1        | 1.901 |
| Man1c1        | 0.005 | 1.536 | 3.768  | 5.304  | 3.677  | 4.013  | 3.615  | 5.487  | 5.122  | Scarb1        | 1.898 |
| Sh3bp2        | 0.004 | 1.536 | -0.430 | 1.105  | -0.359 | -0.682 | -0.250 | 0.975  | 1.235  | Eif4ebp3      | 1.897 |
| E230013L22Rik | 0.000 | 1.535 | 0.607  | 2.142  | 0.613  | 0.549  | 0.658  | 2.113  | 2.170  | E230013L22Rik | 1.897 |
| H3f3b         | 0.005 | 1.535 | 7.168  | 8.703  | 7.357  | 7.005  | 7.142  | 8.492  | 8.914  | Insrr         | 1.896 |
| Luzp2         | 0.006 | 1.534 | 0.507  | 2.041  | 0.552  | 0.200  | 0.768  | 2.032  | 2.049  | Gm48249       | 1.893 |
| Zfp970        | 0.005 | 1.533 | 2.093  | 3.626  | 2.100  | 2.047  | 2.132  | 3.905  | 3.347  | Gm47218       | 1.890 |
| Insrr         | 0.002 | 1.529 | 6.726  | 8.256  | 6.850  | 6.610  | 6.719  | 8.104  | 8.407  | Sh3bp2        | 1.888 |
| Cyp46a1       | 0.006 | 1.529 | 1.409  | 2.938  | 1.430  | 1.248  | 1.549  | 2.686  | 3.191  | Lhx1          | 1.888 |
| Pkdcc         | 0.000 | 1.529 | 5.460  | 6.989  | 5.529  | 5.346  | 5.505  | 7.020  | 6.959  | Pkdcc         | 1.882 |
| Nhs12         | 0.004 | 1.526 | -0.063 | 1.463  | -0.108 | -0.175 | 0.095  | 1.249  | 1.678  | mt-Nd6        | 1.881 |
| Gm14201       | 0.003 | 1.525 | 3.079  | 4.604  | 2.938  | 3.310  | 2.989  | 4.474  | 4.735  | Gpr119        | 1.877 |
| Oasl1         | 0.008 | 1.525 | -0.336 | 1.189  | -0.351 | -0.045 | -0.610 | 1.331  | 1.046  | Gm14201       | 1.871 |
| C630043F03Rik | 0.001 | 1.524 | 1.119  | 2.643  | 0.985  | 1.074  | 1.298  | 2.650  | 2.637  | Cbfa2t3       | 1.871 |
| Lhx1          | 0.002 | 1.524 | 2.209  | 3.733  | 2.270  | 2.268  | 2.089  | 3.892  | 3.574  | C630043F03Rik | 1.864 |
| Cbfa2t3       | 0.001 | 1.521 | 3.437  | 4.957  | 3.580  | 3.370  | 3.360  | 4.843  | 5.071  | Cnksr3        | 1.860 |
| Gm27415       | 0.007 | 1.520 | 1.906  | 3.427  | 1.842  | 1.668  | 2.209  | 3.556  | 3.298  | Luzp2         | 1.859 |
| Frrs1         | 0.000 | 1.516 | 1.322  | 2.838  | 1.449  | 1.294  | 1.222  | 2.829  | 2.846  | Oasl1         | 1.854 |
| Gm14681       | 0.001 | 1.508 | 0.280  | 1.788  | 0.314  | 0.139  | 0.385  | 1.835  | 1.741  | Frrs1         | 1.854 |
| Gm44706       | 0.005 | 1.507 | 1.100  | 2.607  | 1.015  | 0.889  | 1.398  | 2.645  | 2.569  | 2310022B05Rik | 1.849 |
| mt-Nd5        | 0.002 | 1.506 | 10.715 | 12.221 | 10.787 | 10.504 | 10.855 | 12.282 | 12.160 | Gm27415       | 1.845 |
| Gm45623       | 0.002 | 1.505 | 2.025  | 3.530  | 1.858  | 2.095  | 2.123  | 3.639  | 3.421  | Prrt1         | 1.840 |
| Cnksr3        | 0.002 | 1.505 | 2.988  | 4.493  | 2.998  | 2.933  | 3.032  | 4.307  | 4.678  | Map3k15       | 1.840 |
| Gpr119        | 0.007 | 1.504 | 4.413  | 5.917  | 4.287  | 4.396  | 4.557  | 5.646  | 6.187  | Gm14681       | 1.839 |
| Gm45486       | 0.004 | 1.504 | 4.801  | 6.304  | 4.993  | 4.622  | 4.786  | 6.144  | 6.465  | Gm45486       | 1.837 |
| Cracdl        | 0.003 | 1.503 | 2.442  | 3.945  | 2.481  | 2.261  | 2.583  | 3.805  | 4.084  | Gm45623       | 1.837 |
| Gm15518       | 0.008 | 1.502 | -0.593 | 0.908  | -0.822 | -0.281 | -0.678 | 0.756  | 1.061  | Cracdl        | 1.835 |
| Arhgef37      | 0.002 | 1.500 | 1.533  | 3.033  | 1.639  | 1.348  | 1.613  | 2.912  | 3.155  | mt-Nd5        | 1.827 |
| Frmf6         | 0.002 | 1.499 | -0.577 | 0.922  | -0.493 | -0.790 | -0.448 | 0.893  | 0.952  | Arhgef37      | 1.827 |
| Map3k15       | 0.003 | 1.497 | 6.577  | 8.075  | 6.590  | 6.446  | 6.696  | 7.886  | 8.264  | Mocos         | 1.819 |
| Mocos         | 0.000 | 1.496 | 1.226  | 2.722  | 1.249  | 1.152  | 1.276  | 2.685  | 2.758  | Frmf6         | 1.813 |

|               |       |       |        |       |        |        |        |       |       |               |       |
|---------------|-------|-------|--------|-------|--------|--------|--------|-------|-------|---------------|-------|
| Prrt1         | 0.003 | 1.493 | 2.865  | 4.358 | 2.946  | 2.854  | 2.795  | 4.156 | 4.561 | Gm15518       | 1.812 |
| 2310022B05Rik | 0.005 | 1.492 | 5.751  | 7.244 | 5.714  | 5.878  | 5.662  | 6.998 | 7.489 | Gm44706       | 1.810 |
| Kdm6b         | 0.001 | 1.489 | 4.209  | 5.698 | 4.318  | 4.147  | 4.161  | 5.604 | 5.792 | Kdm6b         | 1.809 |
| 4930550C14Rik | 0.003 | 1.487 | 2.258  | 3.745 | 2.333  | 2.431  | 2.010  | 3.792 | 3.699 | Gm50242       | 1.809 |
| Bri3          | 0.002 | 1.481 | 4.191  | 5.672 | 4.149  | 4.366  | 4.057  | 5.553 | 5.792 | Cry1          | 1.800 |
| Gm50242       | 0.001 | 1.481 | 1.312  | 2.793 | 1.255  | 1.340  | 1.340  | 2.628 | 2.958 | Dpp6          | 1.791 |
| Gm25193       | 0.004 | 1.477 | 2.849  | 4.326 | 2.812  | 2.638  | 3.097  | 4.383 | 4.268 | Jade3         | 1.791 |
| Cryz          | 0.001 | 1.476 | 2.248  | 3.724 | 2.347  | 2.315  | 2.084  | 3.781 | 3.667 | Bri3          | 1.790 |
| Dpp6          | 0.001 | 1.472 | 0.862  | 2.334 | 0.886  | 0.860  | 0.841  | 2.170 | 2.498 | Plekha5       | 1.787 |
| Plekha5       | 0.001 | 1.470 | 3.625  | 5.095 | 3.609  | 3.669  | 3.596  | 4.932 | 5.258 | Plppr1        | 1.786 |
| Jade3         | 0.003 | 1.467 | 3.805  | 5.272 | 3.831  | 3.851  | 3.734  | 5.066 | 5.478 | 4930550C14Rik | 1.784 |
| Gm15787       | 0.001 | 1.466 | -0.120 | 1.347 | -0.196 | -0.180 | 0.016  | 1.320 | 1.373 | Snhg4         | 1.779 |
| Gm8437        | 0.001 | 1.465 | 2.067  | 3.532 | 2.107  | 2.032  | 2.063  | 3.365 | 3.700 | Gm8437        | 1.779 |
| Fam43a        | 0.002 | 1.465 | 1.025  | 2.490 | 1.160  | 1.035  | 0.881  | 2.372 | 2.608 | Cryz          | 1.775 |
| Nrtn          | 0.001 | 1.464 | 3.835  | 5.299 | 3.916  | 3.828  | 3.760  | 5.419 | 5.178 | 1700034H15Rik | 1.774 |
| Heg1          | 0.000 | 1.461 | 2.136  | 3.598 | 2.225  | 2.090  | 2.095  | 3.613 | 3.582 | Nrtn          | 1.766 |
| Tle6          | 0.009 | 1.461 | 1.426  | 2.886 | 1.653  | 1.564  | 1.061  | 2.864 | 2.909 | Gm25193       | 1.762 |
| Gm49209       | 0.004 | 1.461 | -0.081 | 1.380 | 0.140  | -0.063 | -0.320 | 1.322 | 1.437 | Fam43a        | 1.761 |
| Plppr1        | 0.008 | 1.458 | 0.351  | 1.809 | 0.189  | 0.375  | 0.489  | 1.536 | 2.082 | Elovl2        | 1.760 |
| Elovl2        | 0.002 | 1.458 | 2.963  | 4.420 | 2.932  | 2.876  | 3.080  | 4.588 | 4.253 | Gm15787       | 1.758 |
| Cry1          | 0.007 | 1.457 | 2.744  | 4.200 | 2.762  | 2.717  | 2.752  | 4.490 | 3.911 | Heg1          | 1.751 |
| Fhod3         | 0.000 | 1.456 | 3.826  | 5.282 | 3.750  | 3.937  | 3.792  | 5.224 | 5.340 | Satb1         | 1.742 |
| Satb1         | 0.000 | 1.455 | 1.595  | 3.050 | 1.592  | 1.674  | 1.520  | 3.109 | 2.992 | Fhod3         | 1.742 |
| Gm6733        | 0.004 | 1.454 | -0.010 | 1.444 | 0.242  | -0.146 | -0.128 | 1.327 | 1.560 | Tmem121b      | 1.736 |
| Snhg4         | 0.005 | 1.454 | 0.331  | 1.785 | 0.381  | 0.371  | 0.241  | 1.530 | 2.040 | Mov10         | 1.733 |
| Plod1         | 0.006 | 1.450 | 2.696  | 4.146 | 2.722  | 2.950  | 2.415  | 4.215 | 4.076 | Gm49209       | 1.731 |
| Mov10         | 0.000 | 1.450 | 1.900  | 3.349 | 1.963  | 1.901  | 1.835  | 3.280 | 3.419 | Znrf3         | 1.729 |
| Tmem121b      | 0.001 | 1.446 | 2.060  | 3.507 | 2.050  | 1.996  | 2.134  | 3.366 | 3.647 | Gm6733        | 1.727 |
| Elf3          | 0.001 | 1.446 | 4.362  | 5.807 | 4.448  | 4.224  | 4.413  | 5.845 | 5.769 | Plcb3         | 1.723 |
| Plcb3         | 0.000 | 1.446 | 2.559  | 4.005 | 2.588  | 2.627  | 2.463  | 3.946 | 4.063 | 1810008I18Rik | 1.721 |
| 1810008I18Rik | 0.001 | 1.444 | 3.804  | 5.248 | 3.703  | 3.898  | 3.812  | 5.161 | 5.335 | Elf3          | 1.719 |
| Eps8          | 0.001 | 1.442 | 3.430  | 4.872 | 3.332  | 3.575  | 3.384  | 4.889 | 4.855 | Mir370        | 1.717 |
| Mir370        | 0.000 | 1.442 | 0.000  | 1.442 | 0.000  | 0.000  | 0.000  | 1.407 | 1.477 | Gm41584       | 1.715 |
| 1700034H15Rik | 0.008 | 1.441 | -0.623 | 0.818 | -0.639 | -0.623 | -0.608 | 0.517 | 1.119 | Syne2         | 1.714 |
| Znrf3         | 0.002 | 1.439 | 1.607  | 3.046 | 1.581  | 1.567  | 1.671  | 2.879 | 3.212 | Naa80         | 1.711 |
| Syne2         | 0.001 | 1.439 | 1.679  | 3.118 | 1.703  | 1.764  | 1.569  | 3.017 | 3.219 | Tle6          | 1.710 |
| Naa80         | 0.000 | 1.439 | 3.062  | 4.501 | 3.037  | 3.059  | 3.089  | 4.509 | 4.493 | Eps8          | 1.710 |
| Gm41584       | 0.001 | 1.439 | 2.992  | 4.431 | 2.881  | 3.020  | 3.075  | 4.316 | 4.546 | Plod1         | 1.704 |
| Per1          | 0.004 | 1.437 | 4.918  | 6.356 | 5.094  | 4.661  | 5.000  | 6.455 | 6.257 | Phactr4       | 1.703 |
| Adrb2         | 0.001 | 1.437 | 1.778  | 3.215 | 1.632  | 1.830  | 1.874  | 3.204 | 3.226 | Gm16071       | 1.703 |
| H2-Ab1        | 0.000 | 1.434 | 0.741  | 2.175 | 0.858  | 0.639  | 0.726  | 2.174 | 2.175 | Adrb2         | 1.700 |
| Ces5a         | 0.002 | 1.433 | 0.523  | 1.955 | 0.690  | 0.555  | 0.322  | 1.971 | 1.940 | Kif13b        | 1.700 |
| Phactr4       | 0.000 | 1.433 | 3.967  | 5.400 | 3.936  | 3.974  | 3.991  | 5.315 | 5.484 | Mt2           | 1.697 |
| Mpp7          | 0.001 | 1.432 | 2.145  | 3.578 | 2.015  | 2.097  | 2.324  | 3.570 | 3.585 | H2-Ab1        | 1.696 |
| Mt2           | 0.009 | 1.432 | 3.964  | 5.396 | 3.817  | 4.247  | 3.827  | 5.197 | 5.595 | Cys1          | 1.693 |
| Tspan4        | 0.003 | 1.431 | 0.801  | 2.232 | 0.749  | 0.621  | 1.032  | 2.280 | 2.184 | Per1          | 1.693 |
| Gm49125       | 0.005 | 1.428 | -0.186 | 1.242 | -0.341 | -0.294 | 0.078  | 1.341 | 1.142 | Pex11a        | 1.691 |
| Cd81          | 0.006 | 1.427 | 5.045  | 6.473 | 5.266  | 5.123  | 4.747  | 6.392 | 6.553 | Inpp5a        | 1.691 |
| Cys1          | 0.010 | 1.427 | 2.920  | 4.347 | 2.900  | 3.171  | 2.689  | 4.565 | 4.128 | Mpp7          | 1.688 |
| Inpp5a        | 0.000 | 1.426 | 3.891  | 5.317 | 3.851  | 3.948  | 3.875  | 5.224 | 5.410 | Ldb1          | 1.688 |
| Adamts6       | 0.000 | 1.426 | 1.973  | 3.399 | 1.978  | 1.914  | 2.027  | 3.374 | 3.423 | Mthfd2l       | 1.687 |
| Kif13b        | 0.002 | 1.425 | 4.670  | 6.096 | 4.627  | 4.779  | 4.605  | 6.262 | 5.930 | Adamts6       | 1.686 |
| Pex11a        | 0.001 | 1.425 | 3.331  | 4.756 | 3.331  | 3.433  | 3.228  | 4.880 | 4.633 | Ces5a         | 1.685 |
| Hsd17b13      | 0.002 | 1.425 | -0.005 | 1.420 | 0.145  | 0.021  | -0.180 | 1.477 | 1.364 | Klhl42        | 1.684 |
| Gm43034       | 0.006 | 1.424 | -0.403 | 1.021 | -0.679 | -0.369 | -0.161 | 0.921 | 1.122 | Rapgef1l      | 1.684 |
| Gm37303       | 0.007 | 1.424 | 1.218  | 2.642 | 0.949  | 1.514  | 1.192  | 2.563 | 2.721 | Dop1b         | 1.682 |
| Gm16071       | 0.004 | 1.423 | 0.325  | 1.748 | 0.284  | 0.464  | 0.226  | 1.539 | 1.957 | Kcnc3         | 1.681 |
| Kcnc3         | 0.000 | 1.422 | 3.611  | 5.033 | 3.532  | 3.668  | 3.632  | 4.962 | 5.104 | Gm14321       | 1.681 |
| Rapgef1l      | 0.000 | 1.421 | 1.230  | 2.651 | 1.263  | 1.238  | 1.188  | 2.549 | 2.752 | Dipk2a        | 1.679 |
| Gm42658       | 0.007 | 1.421 | 0.206  | 1.627 | -0.093 | 0.474  | 0.236  | 1.570 | 1.683 | Tspan4        | 1.679 |
| Sertad2       | 0.000 | 1.420 | 2.421  | 3.841 | 2.452  | 2.492  | 2.320  | 3.849 | 3.833 | Marcks        | 1.677 |
| Dop1b         | 0.000 | 1.420 | 4.083  | 5.503 | 4.074  | 4.110  | 4.065  | 5.399 | 5.606 | Hsd17b13      | 1.676 |
| Gm14321       | 0.001 | 1.419 | 0.471  | 1.890 | 0.485  | 0.410  | 0.518  | 2.005 | 1.774 | Six4          | 1.676 |
| Zbtb20        | 0.000 | 1.418 | 3.099  | 4.517 | 3.083  | 3.151  | 3.064  | 4.462 | 4.573 | Hpn           | 1.674 |
| D930020B18Rik | 0.010 | 1.418 | 0.516  | 1.934 | 0.838  | 0.209  | 0.501  | 1.850 | 2.019 | Zbtb20        | 1.674 |
| Foxn2         | 0.001 | 1.418 | 2.127  | 3.546 | 2.209  | 1.936  | 2.238  | 3.519 | 3.572 | Gm49125       | 1.673 |

|               |       |       |        |        |        |        |        |        |        |               |       |
|---------------|-------|-------|--------|--------|--------|--------|--------|--------|--------|---------------|-------|
| Mthfd2l       | 0.004 | 1.417 | 0.013  | 1.430  | 0.024  | 0.139  | -0.123 | 1.235  | 1.625  | Sema4a        | 1.673 |
| Hpn           | 0.002 | 1.416 | 0.912  | 3.328  | 2.010  | 1.779  | 1.947  | 3.195  | 3.462  | Casp6         | 1.673 |
| Sema4a        | 0.001 | 1.414 | 3.995  | 5.409  | 3.918  | 4.107  | 3.960  | 5.274  | 5.545  | Sertad2       | 1.672 |
| Ankrd10       | 0.000 | 1.414 | 5.075  | 6.489  | 5.086  | 5.118  | 5.021  | 6.441  | 6.537  | Gm8113        | 1.668 |
| Casp6         | 0.001 | 1.414 | 1.286  | 2.701  | 1.293  | 1.200  | 1.367  | 2.570  | 2.831  | Ankrd10       | 1.666 |
| Klhl42        | 0.002 | 1.414 | 2.831  | 4.244  | 2.914  | 2.797  | 2.781  | 4.058  | 4.431  | Utp14b        | 1.664 |
| Dipk2a        | 0.002 | 1.414 | 3.931  | 5.345  | 3.871  | 3.906  | 4.016  | 5.181  | 5.509  | Gm43071       | 1.664 |
| 4933431C10Rik | 0.007 | 1.412 | 0.849  | 2.261  | 0.807  | 0.604  | 1.136  | 2.177  | 2.345  | Cd81          | 1.663 |
| Six4          | 0.002 | 1.411 | 1.951  | 3.362  | 1.901  | 1.899  | 2.053  | 3.190  | 3.535  | Gm43034       | 1.662 |
| Kif16b        | 0.001 | 1.411 | 3.940  | 5.351  | 3.797  | 4.002  | 4.020  | 5.277  | 5.425  | Foxn2         | 1.661 |
| Marcks        | 0.002 | 1.410 | 3.741  | 5.150  | 3.713  | 3.786  | 3.723  | 4.968  | 5.332  | Npr2          | 1.656 |
| Gm43071       | 0.001 | 1.409 | 1.227  | 2.636  | 1.214  | 1.203  | 1.264  | 2.520  | 2.752  | Kif16b        | 1.656 |
| Npr2          | 0.001 | 1.409 | 2.453  | 3.862  | 2.333  | 2.535  | 2.492  | 3.765  | 3.958  | 4930429F24Rik | 1.655 |
| Ldb1          | 0.005 | 1.408 | 5.380  | 6.788  | 5.420  | 5.437  | 5.282  | 6.545  | 7.031  | Nfkbie        | 1.653 |
| Nfkbie        | 0.000 | 1.407 | 1.153  | 2.560  | 1.088  | 1.173  | 1.197  | 2.502  | 2.618  | Gm37303       | 1.652 |
| Utp14b        | 0.003 | 1.407 | 0.461  | 1.868  | 0.364  | 0.424  | 0.597  | 2.042  | 1.694  | Nup210        | 1.649 |
| Flrt1         | 0.001 | 1.406 | 1.580  | 2.986  | 1.598  | 1.721  | 1.420  | 2.941  | 3.031  | Gm42658       | 1.646 |
| Gpr137b       | 0.001 | 1.406 | 2.531  | 3.937  | 2.393  | 2.629  | 2.571  | 3.986  | 3.888  | Gpr137b       | 1.646 |
| 4930429F24Rik | 0.006 | 1.406 | 1.701  | 3.107  | 1.633  | 1.925  | 1.547  | 2.922  | 3.293  | Il10rb        | 1.643 |
| Nup210        | 0.001 | 1.404 | 3.312  | 4.715  | 3.229  | 3.420  | 3.286  | 4.609  | 4.822  | Flrt1         | 1.642 |
| Gm49654       | 0.004 | 1.403 | 1.551  | 2.954  | 1.567  | 1.309  | 1.776  | 3.007  | 2.901  | Serpina10     | 1.640 |
| Il10rb        | 0.000 | 1.403 | 2.125  | 3.528  | 2.127  | 2.087  | 2.161  | 3.532  | 3.524  | Tsga10        | 1.640 |
| mt-Nd1        | 0.004 | 1.401 | 11.163 | 12.564 | 11.273 | 10.907 | 11.310 | 12.624 | 12.504 | Zfhx3         | 1.639 |
| Enc1          | 0.000 | 1.399 | 4.422  | 5.821  | 4.377  | 4.407  | 4.484  | 5.877  | 5.765  | Spag1         | 1.639 |
| Zfhx3         | 0.000 | 1.398 | 0.966  | 2.364  | 0.975  | 0.983  | 0.941  | 2.282  | 2.446  | Enc1          | 1.637 |
| Gm39041       | 0.001 | 1.398 | -0.226 | 1.171  | -0.270 | -0.318 | -0.092 | 1.161  | 1.181  | D930020B18Rik | 1.635 |
| Gpd2          | 0.002 | 1.395 | 4.691  | 6.086  | 4.630  | 4.856  | 4.585  | 5.959  | 6.213  | 4933431C10Rik | 1.635 |
| Ern1          | 0.000 | 1.395 | 6.864  | 8.259  | 6.832  | 6.795  | 6.963  | 8.255  | 8.262  | Gpd2          | 1.631 |
| Tacc2         | 0.001 | 1.395 | 3.465  | 4.860  | 3.376  | 3.434  | 3.585  | 4.816  | 4.904  | Gm39041       | 1.629 |
| Tsga10        | 0.004 | 1.394 | 2.138  | 3.532  | 2.091  | 2.297  | 2.026  | 3.712  | 3.352  | Ern1          | 1.627 |
| ENSMUSG000001 | 0.001 | 1.393 | 1.735  | 3.128  | 1.885  | 1.608  | 1.713  | 3.087  | 3.170  | Tacc2         | 1.626 |
| Gm44250       | 0.001 | 1.391 | 2.326  | 3.717  | 2.400  | 2.183  | 2.396  | 3.738  | 3.697  | Gm49654       | 1.624 |
| Rpl37rt       | 0.005 | 1.390 | 0.005  | 1.396  | -0.268 | 0.142  | 0.142  | 1.478  | 1.313  | Gm43482       | 1.623 |
| Gm43482       | 0.003 | 1.390 | -0.627 | 0.763  | -0.511 | -0.817 | -0.552 | 0.907  | 0.619  | mt-Nd1        | 1.622 |
| Gm44667       | 0.002 | 1.390 | -0.235 | 1.155  | -0.385 | -0.057 | -0.262 | 1.135  | 1.174  | Neu3          | 1.619 |
| Neu3          | 0.007 | 1.386 | 0.499  | 1.885  | 0.676  | 0.543  | 0.278  | 1.695  | 2.074  | Agap2         | 1.619 |
| Gm45698       | 0.006 | 1.385 | 0.470  | 1.855  | 0.379  | 0.761  | 0.268  | 1.908  | 1.802  | ENSMUSG00000  | 1.619 |
| 2610020C07Rik | 0.000 | 1.383 | 0.267  | 1.651  | 0.327  | 0.227  | 0.247  | 1.696  | 1.605  | Snx6          | 1.619 |
| Gm8113        | 0.009 | 1.383 | 0.000  | 1.383  | 0.000  | 0.000  | 0.000  | 1.073  | 1.692  | Gm44250       | 1.617 |
| Spag1         | 0.010 | 1.383 | 1.595  | 2.978  | 1.411  | 1.748  | 1.628  | 2.713  | 3.243  | 2610020C07Rik | 1.609 |
| Rps6ka1       | 0.000 | 1.381 | 0.372  | 1.753  | 0.371  | 0.371  | 0.373  | 1.699  | 1.807  | Gm44667       | 1.609 |
| Serpina10     | 0.005 | 1.380 | 4.773  | 6.153  | 4.755  | 4.738  | 4.826  | 6.400  | 5.907  | Rps6ka1       | 1.606 |
| Prob1         | 0.002 | 1.380 | 3.137  | 4.517  | 3.123  | 3.323  | 2.965  | 4.548  | 4.486  | Rpl37rt       | 1.603 |
| Dzip1l        | 0.001 | 1.375 | 1.455  | 2.831  | 1.468  | 1.354  | 1.544  | 2.906  | 2.756  | Pxmp4         | 1.599 |
| Nacc2         | 0.006 | 1.374 | 2.761  | 4.136  | 2.750  | 3.026  | 2.508  | 4.141  | 4.130  | Gm33091       | 1.595 |
| Pxmp4         | 0.001 | 1.374 | 3.095  | 4.469  | 3.062  | 3.137  | 3.087  | 4.357  | 4.581  | Dzip1l        | 1.594 |
| Trp53i11      | 0.001 | 1.373 | 3.233  | 4.606  | 3.178  | 3.396  | 3.124  | 4.609  | 4.603  | Gm45487       | 1.593 |
| N4bp2os       | 0.000 | 1.373 | 2.489  | 3.862  | 2.408  | 2.549  | 2.511  | 3.803  | 3.922  | Mtfr1         | 1.591 |
| Gm24182       | 0.000 | 1.372 | 0.000  | 1.372  | 0.000  | 0.000  | 0.000  | 1.384  | 1.361  | Gm15777       | 1.590 |
| Gm33091       | 0.006 | 1.372 | 0.510  | 1.882  | 0.528  | 0.691  | 0.310  | 2.070  | 1.693  | N4bp2os       | 1.590 |
| Macf1         | 0.000 | 1.371 | 4.398  | 5.768  | 4.307  | 4.489  | 4.397  | 5.721  | 5.816  | Prob1         | 1.590 |
| Elmo1         | 0.001 | 1.371 | 2.337  | 3.708  | 2.376  | 2.424  | 2.211  | 3.605  | 3.810  | Gm24182       | 1.589 |
| Arhgef10      | 0.002 | 1.370 | 2.060  | 3.430  | 2.089  | 1.887  | 2.203  | 3.507  | 3.353  | Elmo1         | 1.587 |
| Zfp174        | 0.001 | 1.370 | 3.061  | 4.431  | 3.065  | 2.911  | 3.207  | 4.374  | 4.489  | Gm45698       | 1.585 |
| Atn1          | 0.000 | 1.370 | 1.121  | 2.491  | 1.086  | 1.053  | 1.223  | 2.438  | 2.544  | Zbtb18        | 1.585 |
| Zbtb18        | 0.000 | 1.370 | 3.943  | 5.312  | 4.023  | 3.915  | 3.890  | 5.239  | 5.385  | Macf1         | 1.584 |
| Zfp69         | 0.000 | 1.369 | 1.324  | 2.693  | 1.328  | 1.432  | 1.212  | 2.672  | 2.714  | Atn1          | 1.583 |
| Gm45487       | 0.004 | 1.369 | 5.158  | 6.527  | 5.269  | 4.993  | 5.212  | 6.350  | 6.703  | Grpel2        | 1.582 |
| Grpel2        | 0.000 | 1.368 | 2.875  | 4.243  | 2.845  | 2.957  | 2.825  | 4.170  | 4.316  | Trp53i11      | 1.582 |
| Ptpn13        | 0.000 | 1.365 | 2.447  | 3.812  | 2.345  | 2.539  | 2.457  | 3.770  | 3.854  | 2210411M09Rik | 1.582 |
| 2210411M09Rik | 0.001 | 1.365 | 1.487  | 2.852  | 1.499  | 1.553  | 1.410  | 2.967  | 2.737  | Arhgef10      | 1.579 |
| Mtfr1         | 0.002 | 1.365 | 4.541  | 5.906  | 4.521  | 4.626  | 4.476  | 5.736  | 6.076  | Zfp69         | 1.578 |
| Snx6          | 0.008 | 1.365 | 5.389  | 6.754  | 5.373  | 5.481  | 5.314  | 7.029  | 6.479  | Zfp174        | 1.578 |
| Agap2         | 0.007 | 1.364 | 0.470  | 1.834  | 0.500  | 0.394  | 0.515  | 1.560  | 2.108  | Lrrc8b        | 1.576 |
| Gm47798       | 0.005 | 1.364 | 1.417  | 2.781  | 1.461  | 1.154  | 1.636  | 2.752  | 2.811  | Ptpn13        | 1.574 |
| Bend5         | 0.003 | 1.363 | 0.888  | 2.250  | 1.073  | 0.870  | 0.719  | 2.334  | 2.167  | Pcsk6         | 1.572 |



|               |       |       |        |        |        |        |        |        |       |               |       |
|---------------|-------|-------|--------|--------|--------|--------|--------|--------|-------|---------------|-------|
| Pcsk6         | 0.001 | 1.363 | 2.430  | 3.793  | 2.344  | 2.421  | 2.525  | 3.716  | 3.869 | Abtb2         | 1.570 |
| Gm25579       | 0.008 | 1.362 | 0.155  | 1.517  | 0.000  | 0.000  | 0.466  | 1.397  | 1.637 | Celsr2        | 1.570 |
| Abtb2         | 0.000 | 1.362 | 2.829  | 4.191  | 2.798  | 2.917  | 2.772  | 4.253  | 4.130 | Eepd1         | 1.569 |
| Arhgap18      | 0.000 | 1.360 | 1.944  | 3.304  | 2.012  | 1.911  | 1.909  | 3.357  | 3.250 | Arhgap18      | 1.567 |
| Mpz           | 0.000 | 1.359 | 3.333  | 4.692  | 3.357  | 3.320  | 3.320  | 4.713  | 4.670 | Fkbp7         | 1.567 |
| Fkbp7         | 0.006 | 1.359 | 1.339  | 2.697  | 1.558  | 1.256  | 1.202  | 2.865  | 2.530 | Mpz           | 1.565 |
| Eepd1         | 0.001 | 1.357 | 2.287  | 3.644  | 2.297  | 2.242  | 2.324  | 3.759  | 3.530 | Nacc2         | 1.565 |
| Celsr2        | 0.001 | 1.356 | 2.488  | 3.843  | 2.449  | 2.485  | 2.530  | 3.709  | 3.978 | Tmem131l      | 1.564 |
| Gm15777       | 0.008 | 1.356 | 2.105  | 3.461  | 2.182  | 2.191  | 1.943  | 3.209  | 3.713 | Bend5         | 1.563 |
| Lrrc8b        | 0.007 | 1.356 | 1.846  | 3.201  | 1.816  | 2.024  | 1.698  | 2.985  | 3.417 | Cpeb2         | 1.558 |
| Tmem131l      | 0.003 | 1.352 | 2.898  | 4.250  | 2.826  | 3.046  | 2.821  | 4.079  | 4.421 | Slc6a19       | 1.554 |
| Bach1         | 0.001 | 1.352 | 3.671  | 5.024  | 3.529  | 3.742  | 3.744  | 5.019  | 5.028 | Sh3bp4        | 1.551 |
| Slc6a19       | 0.007 | 1.352 | 1.965  | 3.317  | 1.968  | 2.170  | 1.758  | 3.142  | 3.492 | Gm47798       | 1.550 |
| Tmem97        | 0.003 | 1.350 | 4.291  | 5.641  | 4.157  | 4.499  | 4.217  | 5.564  | 5.718 | Gm25579       | 1.549 |
| Tjp2          | 0.002 | 1.350 | 3.768  | 5.118  | 3.820  | 3.897  | 3.587  | 5.051  | 5.184 | Bach1         | 1.547 |
| Gm19721       | 0.000 | 1.348 | 2.169  | 3.516  | 2.151  | 2.104  | 2.251  | 3.521  | 3.512 | Gm19721       | 1.542 |
| H2-Q4         | 0.002 | 1.346 | 4.466  | 5.812  | 4.611  | 4.464  | 4.324  | 5.908  | 5.716 | Tjp2          | 1.541 |
| Gm37127       | 0.009 | 1.345 | -0.338 | 1.008  | -0.653 | -0.102 | -0.258 | 0.932  | 1.083 | Tmem97        | 1.540 |
| Sh3bp4        | 0.003 | 1.344 | 2.648  | 3.992  | 2.760  | 2.625  | 2.558  | 3.821  | 4.162 | H2-Q4         | 1.539 |
| Pdgfa         | 0.001 | 1.344 | 3.133  | 4.477  | 3.246  | 3.034  | 3.121  | 4.412  | 4.542 | Adh1          | 1.536 |
| Osbp2         | 0.007 | 1.341 | -0.120 | 1.221  | -0.398 | 0.020  | 0.018  | 1.336  | 1.105 | Pdgfa         | 1.536 |
| Esrrg         | 0.007 | 1.340 | 1.404  | 2.744  | 1.299  | 1.709  | 1.204  | 2.771  | 2.718 | B3gnt3        | 1.531 |
| Mgat4b        | 0.002 | 1.340 | 3.256  | 4.596  | 3.286  | 3.389  | 3.092  | 4.522  | 4.670 | H2-T10        | 1.530 |
| Gm26952       | 0.001 | 1.340 | 2.976  | 4.316  | 3.151  | 2.865  | 2.910  | 4.307  | 4.324 | Mgat4b        | 1.526 |
| Tspan8        | 0.006 | 1.340 | 1.338  | 2.678  | 1.264  | 1.134  | 1.617  | 2.687  | 2.669 | Tubb6         | 1.523 |
| H2-T10        | 0.000 | 1.340 | 1.125  | 2.464  | 1.175  | 1.149  | 1.050  | 2.500  | 2.429 | Gm26952       | 1.522 |
| Adh1          | 0.000 | 1.339 | 6.063  | 7.402  | 6.068  | 6.080  | 6.042  | 7.300  | 7.505 | Gbe1          | 1.518 |
| Ikzf5         | 0.005 | 1.336 | -0.483 | 0.854  | -0.632 | -0.572 | -0.244 | 0.974  | 0.733 | Osbp2         | 1.518 |
| Cpeb2         | 0.009 | 1.336 | 2.902  | 4.238  | 2.756  | 3.037  | 2.913  | 3.979  | 4.498 | Pi4k2b        | 1.517 |
| B3gnt3        | 0.002 | 1.336 | 4.381  | 5.717  | 4.378  | 4.282  | 4.483  | 5.584  | 5.850 | Ikzf5         | 1.516 |
| D730003l15Rik | 0.004 | 1.335 | 2.262  | 3.597  | 2.447  | 2.033  | 2.307  | 3.639  | 3.556 | Cdk14         | 1.515 |
| Tubb6         | 0.000 | 1.335 | 2.444  | 3.779  | 2.519  | 2.357  | 2.456  | 3.849  | 3.709 | 9430034N14Rik | 1.514 |
| 9430034N14Rik | 0.002 | 1.335 | -0.601 | 0.734  | -0.773 | -0.561 | -0.470 | 0.778  | 0.689 | Ttll11        | 1.513 |
| Pi4k2b        | 0.000 | 1.334 | 4.736  | 6.070  | 4.754  | 4.624  | 4.829  | 6.065  | 6.074 | Gm37127       | 1.513 |
| Cdk14         | 0.001 | 1.330 | 2.671  | 4.001  | 2.563  | 2.721  | 2.730  | 4.093  | 3.909 | Sox13         | 1.512 |
| D630045J12Rik | 0.000 | 1.329 | 1.965  | 3.294  | 1.890  | 2.051  | 1.954  | 3.254  | 3.335 | D630045J12Rik | 1.511 |
| Fbrsl1        | 0.001 | 1.325 | 4.700  | 6.025  | 4.771  | 4.778  | 4.551  | 6.028  | 6.021 | D730003l15Rik | 1.507 |
| Gm4017        | 0.003 | 1.324 | 1.824  | 3.147  | 1.596  | 1.966  | 1.909  | 3.082  | 3.212 | Tspan8        | 1.505 |
| Rnf149        | 0.000 | 1.324 | 4.104  | 5.427  | 4.047  | 4.167  | 4.098  | 5.347  | 5.508 | Rnf149        | 1.505 |
| Ttll11        | 0.004 | 1.323 | 0.959  | 2.282  | 1.101  | 0.885  | 0.892  | 2.111  | 2.453 | Esrrg         | 1.503 |
| 4833418N02Rik | 0.000 | 1.322 | 2.028  | 3.350  | 1.950  | 2.001  | 2.132  | 3.391  | 3.309 | Kcnk12        | 1.501 |
| Kmt2d         | 0.000 | 1.322 | 4.198  | 5.520  | 4.273  | 4.134  | 4.187  | 5.472  | 5.568 | Kmt2d         | 1.499 |
| Cd63-ps       | 0.009 | 1.321 | -0.305 | 1.016  | -0.624 | -0.214 | -0.077 | 0.937  | 1.095 | Fbrsl1        | 1.499 |
| Cat           | 0.006 | 1.319 | 2.055  | 3.374  | 2.030  | 2.270  | 1.865  | 3.233  | 3.514 | 4833418N02Rik | 1.498 |
| Aldh1l2       | 0.002 | 1.318 | 4.367  | 5.686  | 4.245  | 4.284  | 4.573  | 5.686  | 5.685 | Ptch1         | 1.493 |
| Ptch1         | 0.006 | 1.318 | 2.818  | 4.136  | 2.805  | 3.015  | 2.635  | 3.976  | 4.295 | Gm4017        | 1.490 |
| Kcnk12        | 0.002 | 1.317 | 3.086  | 4.404  | 3.016  | 3.196  | 3.047  | 4.262  | 4.546 | Cat           | 1.489 |
| Sox13         | 0.005 | 1.316 | 2.320  | 3.637  | 2.433  | 2.293  | 2.235  | 3.428  | 3.845 | Malat1        | 1.487 |
| Gbe1          | 0.004 | 1.316 | 2.765  | 4.081  | 2.766  | 2.797  | 2.731  | 3.864  | 4.298 | Npepl1        | 1.486 |
| Npepl1        | 0.000 | 1.314 | 6.491  | 7.805  | 6.525  | 6.465  | 6.484  | 7.775  | 7.835 | Mir22hg       | 1.485 |
| Mir22hg       | 0.000 | 1.313 | 3.721  | 5.034  | 3.679  | 3.709  | 3.776  | 5.084  | 4.984 | Gm50087       | 1.484 |
| Cbx4          | 0.000 | 1.312 | 4.867  | 6.179  | 4.942  | 4.873  | 4.787  | 6.152  | 6.206 | Aldh1l2       | 1.481 |
| Cc2d2b        | 0.004 | 1.311 | 3.111  | 4.422  | 3.099  | 2.901  | 3.332  | 4.374  | 4.469 | Cbx4          | 1.481 |
| Setd1b        | 0.000 | 1.309 | 3.353  | 4.662  | 3.359  | 3.369  | 3.332  | 4.620  | 4.704 | Setd1b        | 1.479 |
| Malat1        | 0.005 | 1.309 | 8.698  | 10.007 | 8.662  | 8.573  | 8.859  | 10.181 | 9.833 | Pdzrn3        | 1.476 |
| Gm50087       | 0.001 | 1.309 | -0.275 | 1.034  | -0.305 | -0.276 | -0.243 | 1.140  | 0.928 | Gramd1b       | 1.474 |
| Snord49b      | 0.003 | 1.307 | 3.566  | 4.873  | 3.358  | 3.652  | 3.687  | 4.813  | 4.932 | Haus5         | 1.472 |
| Arhgef16      | 0.000 | 1.305 | 4.530  | 5.835  | 4.571  | 4.534  | 4.486  | 5.879  | 5.791 | Hmga1b        | 1.471 |
| Gm36989       | 0.001 | 1.304 | 0.968  | 2.272  | 1.108  | 0.889  | 0.907  | 2.248  | 2.296 | Cd63-ps       | 1.470 |
| Gramd1b       | 0.001 | 1.304 | 2.916  | 4.220  | 2.876  | 2.978  | 2.894  | 4.114  | 4.326 | Arhgef16      | 1.470 |
| Ly6e          | 0.000 | 1.303 | 5.909  | 7.212  | 5.873  | 5.910  | 5.946  | 7.167  | 7.258 | Ly6e          | 1.468 |
| Gm9530        | 0.001 | 1.303 | 0.355  | 1.658  | 0.297  | 0.285  | 0.484  | 1.740  | 1.576 | Gm9530        | 1.466 |
| 4930592l03Rik | 0.000 | 1.302 | 1.471  | 2.772  | 1.400  | 1.429  | 1.584  | 2.809  | 2.735 | Snord49b      | 1.464 |
| Etfbkmt       | 0.001 | 1.301 | 1.789  | 3.090  | 1.899  | 1.822  | 1.646  | 3.093  | 3.088 | Cc2d2b        | 1.464 |
| Atxn7l2       | 0.002 | 1.301 | 2.242  | 3.543  | 2.136  | 2.427  | 2.164  | 3.552  | 3.534 | Gm36989       | 1.464 |
| Trib1         | 0.002 | 1.299 | 5.011  | 6.310  | 5.103  | 4.807  | 5.122  | 6.289  | 6.331 | Gm26642       | 1.463 |

|               |       |       |        |        |        |        |        |        |        |               |       |
|---------------|-------|-------|--------|--------|--------|--------|--------|--------|--------|---------------|-------|
| Hmga1b        | 0.002 | 1.299 | 1.533  | 2.832  | 1.535  | 1.615  | 1.450  | 2.687  | 2.978  | 4930592I03Rik | 1.462 |
| Mfsd12        | 0.002 | 1.299 | 1.545  | 2.844  | 1.516  | 1.729  | 1.388  | 2.796  | 2.891  | Etfbkmt       | 1.457 |
| Gm26642       | 0.001 | 1.299 | -0.072 | 1.227  | 0.000  | -0.055 | -0.160 | 1.126  | 1.327  | Tcirg1        | 1.454 |
| Gm43980       | 0.003 | 1.298 | 2.864  | 4.162  | 2.880  | 3.059  | 2.655  | 4.154  | 4.170  | Atxn7I2       | 1.453 |
| Tcirg1        | 0.000 | 1.297 | 2.206  | 3.503  | 2.306  | 2.198  | 2.113  | 3.475  | 3.531  | Mfsd12        | 1.450 |
| Gstt1         | 0.006 | 1.296 | 4.601  | 5.897  | 4.816  | 4.632  | 4.356  | 5.974  | 5.820  | C1qtnf1       | 1.450 |
| C1qtnf1       | 0.007 | 1.296 | 1.925  | 3.221  | 1.770  | 1.839  | 2.167  | 3.071  | 3.370  | Trib1         | 1.450 |
| Gm4285        | 0.005 | 1.295 | 3.295  | 4.590  | 3.210  | 3.545  | 3.132  | 4.513  | 4.667  | Reep6         | 1.448 |
| Haus5         | 0.006 | 1.294 | -0.035 | 1.259  | -0.172 | 0.022  | 0.044  | 1.469  | 1.048  | Tirap         | 1.447 |
| Gm19221       | 0.005 | 1.293 | 1.762  | 3.055  | 1.584  | 2.022  | 1.680  | 3.097  | 3.014  | Neat1         | 1.444 |
| Pdzrn3        | 0.007 | 1.291 | 3.274  | 4.565  | 3.175  | 3.384  | 3.262  | 4.329  | 4.801  | Rassf1        | 1.443 |
| Rassf5        | 0.009 | 1.291 | 0.074  | 1.366  | 0.185  | -0.235 | 0.274  | 1.464  | 1.267  | Gm43980       | 1.442 |
| Tirap         | 0.001 | 1.290 | 0.763  | 2.053  | 0.873  | 0.725  | 0.691  | 1.956  | 2.150  | Cyb5rl        | 1.442 |
| Reep6         | 0.000 | 1.290 | 5.716  | 7.006  | 5.761  | 5.682  | 5.706  | 7.079  | 6.934  | Gm26935       | 1.441 |
| Btg2          | 0.004 | 1.290 | 9.312  | 10.602 | 9.375  | 9.084  | 9.478  | 10.670 | 10.534 | Zfp618        | 1.440 |
| Cyb5rl        | 0.000 | 1.288 | 1.773  | 3.060  | 1.726  | 1.762  | 1.829  | 3.011  | 3.110  | Lin28a        | 1.439 |
| Gm26935       | 0.000 | 1.288 | 1.197  | 2.485  | 1.130  | 1.172  | 1.290  | 2.428  | 2.542  | Gstt1         | 1.438 |
| Zfp618        | 0.000 | 1.287 | 2.400  | 3.687  | 2.307  | 2.434  | 2.460  | 3.626  | 3.749  | Gm4285        | 1.437 |
| Lin28a        | 0.000 | 1.286 | 0.891  | 2.177  | 0.885  | 0.866  | 0.921  | 2.150  | 2.204  | Gm44292       | 1.436 |
| Bend3         | 0.002 | 1.284 | 1.572  | 2.856  | 1.718  | 1.488  | 1.510  | 2.754  | 2.958  | Bend3         | 1.435 |
| Rassf1        | 0.002 | 1.282 | 1.679  | 2.961  | 1.676  | 1.758  | 1.604  | 3.114  | 2.809  | 4930594M22Rik | 1.433 |
| Ppp1r3e       | 0.010 | 1.282 | 1.220  | 2.502  | 1.489  | 1.240  | 0.931  | 2.418  | 2.586  | Btg2          | 1.432 |
| 4930594M22Rik | 0.003 | 1.280 | 1.176  | 2.456  | 1.029  | 1.246  | 1.253  | 2.317  | 2.594  | Gm19221       | 1.430 |
| Gm44292       | 0.006 | 1.278 | 0.638  | 1.916  | 0.770  | 0.457  | 0.687  | 2.108  | 1.723  | Cfap77        | 1.428 |
| Garnl3        | 0.000 | 1.277 | 0.077  | 1.355  | 0.074  | 0.059  | 0.099  | 1.334  | 1.375  | Rassf5        | 1.426 |
| Neat1         | 0.003 | 1.277 | 5.877  | 7.154  | 5.902  | 5.846  | 5.884  | 7.344  | 6.965  | Garnl3        | 1.424 |
| Hs6st3        | 0.001 | 1.277 | 2.662  | 3.938  | 2.565  | 2.794  | 2.626  | 3.961  | 3.916  | Baiap3        | 1.422 |
| A530020G20Rik | 0.003 | 1.277 | 3.247  | 4.524  | 3.368  | 3.055  | 3.318  | 4.444  | 4.604  | Hs6st3        | 1.418 |
| Cdc42ep3      | 0.004 | 1.273 | 0.934  | 2.207  | 1.114  | 0.792  | 0.895  | 2.071  | 2.342  | Pvr           | 1.417 |
| Chmp4c        | 0.000 | 1.272 | 3.156  | 4.428  | 3.175  | 3.182  | 3.111  | 4.375  | 4.481  | Chmp4c        | 1.417 |
| Gm24036       | 0.002 | 1.272 | 0.091  | 1.364  | 0.000  | 0.274  | 0.000  | 1.425  | 1.302  | Cdc42ep3      | 1.417 |
| Bmp2k         | 0.003 | 1.272 | 0.195  | 1.467  | 0.016  | 0.372  | 0.196  | 1.402  | 1.532  | A530020G20Rik | 1.416 |
| Cfap77        | 0.006 | 1.269 | -0.494 | 0.775  | -0.530 | -0.597 | -0.356 | 0.977  | 0.573  | Crybb3        | 1.416 |
| Crybb3        | 0.002 | 1.269 | 1.918  | 3.186  | 1.988  | 1.804  | 1.960  | 3.317  | 3.056  | Tnfrsf12a     | 1.414 |
| Tnfrsf12a     | 0.003 | 1.269 | 2.452  | 3.721  | 2.387  | 2.598  | 2.373  | 3.857  | 3.586  | Gm24036       | 1.408 |
| Pvr           | 0.002 | 1.269 | -0.306 | 0.963  | -0.395 | -0.223 | -0.298 | 0.831  | 1.095  | Susd2         | 1.406 |
| Baiap3        | 0.004 | 1.267 | 6.325  | 7.592  | 6.444  | 6.230  | 6.301  | 7.409  | 7.775  | Ppp1r3e       | 1.406 |
| Acaa2         | 0.000 | 1.266 | 4.693  | 5.959  | 4.700  | 4.660  | 4.719  | 5.975  | 5.943  | Bmp2k         | 1.405 |
| Tlcd1         | 0.002 | 1.266 | 1.505  | 2.771  | 1.480  | 1.689  | 1.347  | 2.745  | 2.796  | Acaa2         | 1.405 |
| Ppp1r3b       | 0.003 | 1.262 | 2.302  | 3.564  | 2.126  | 2.430  | 2.349  | 3.681  | 3.448  | Casr          | 1.403 |
| Ptpru         | 0.001 | 1.261 | 2.179  | 3.440  | 2.188  | 2.308  | 2.039  | 3.395  | 3.485  | Gm45330       | 1.398 |
| Ift88os       | 0.003 | 1.260 | -0.429 | 0.831  | -0.626 | -0.248 | -0.414 | 0.792  | 0.869  | Ppp1r3b       | 1.398 |
| Gm42748       | 0.000 | 1.260 | 1.584  | 2.845  | 1.541  | 1.667  | 1.545  | 2.839  | 2.850  | Tlcd1         | 1.393 |
| 4833422M21Rik | 0.003 | 1.260 | -0.578 | 0.682  | -0.677 | -0.674 | -0.381 | 0.598  | 0.766  | Gm42748       | 1.393 |
| Acadl         | 0.000 | 1.256 | 4.103  | 5.359  | 4.084  | 4.160  | 4.064  | 5.301  | 5.417  | Ptpru         | 1.392 |
| Gm45330       | 0.002 | 1.255 | 4.369  | 5.624  | 4.416  | 4.327  | 4.365  | 5.771  | 5.477  | Acadl         | 1.389 |
| Bcl9l         | 0.001 | 1.252 | 2.625  | 3.878  | 2.462  | 2.742  | 2.673  | 3.867  | 3.888  | 4833422M21Rik | 1.387 |
| Gm29361       | 0.001 | 1.250 | 1.076  | 2.326  | 1.128  | 1.191  | 0.910  | 2.330  | 2.322  | Ift88os       | 1.382 |
| Tjap1         | 0.001 | 1.249 | 2.933  | 4.182  | 3.023  | 2.924  | 2.851  | 4.100  | 4.264  | Tjap1         | 1.378 |
| Kcnq2         | 0.007 | 1.249 | -0.143 | 1.106  | -0.336 | 0.083  | -0.177 | 0.962  | 1.250  | Gpr161        | 1.378 |
| Susd2         | 0.008 | 1.249 | 1.300  | 2.548  | 1.412  | 1.206  | 1.281  | 2.304  | 2.793  | Rnf213        | 1.375 |
| Casr          | 0.004 | 1.249 | 5.126  | 6.375  | 5.141  | 5.125  | 5.112  | 6.160  | 6.589  | Bcl9l         | 1.374 |
| Rap1b         | 0.000 | 1.246 | 7.358  | 8.604  | 7.386  | 7.323  | 7.367  | 8.543  | 8.665  | Rap1b         | 1.373 |
| Gpr161        | 0.002 | 1.245 | 1.547  | 2.792  | 1.586  | 1.461  | 1.595  | 2.659  | 2.925  | 2310040G07Rik | 1.373 |
| 2310040G07Rik | 0.002 | 1.244 | 1.940  | 3.184  | 1.807  | 2.019  | 1.995  | 3.308  | 3.061  | Vil1          | 1.372 |
| Aldh2         | 0.006 | 1.244 | 2.241  | 3.484  | 2.492  | 2.131  | 2.099  | 3.565  | 3.404  | Kcnq2         | 1.371 |
| Zbtb24        | 0.000 | 1.244 | 3.298  | 4.541  | 3.232  | 3.386  | 3.275  | 4.595  | 4.488  | Gm29361       | 1.370 |
| Relb          | 0.001 | 1.243 | 1.556  | 2.799  | 1.473  | 1.689  | 1.506  | 2.733  | 2.865  | Zbtb24        | 1.367 |
| Vil1          | 0.000 | 1.243 | 6.100  | 7.343  | 6.097  | 6.113  | 6.090  | 7.248  | 7.438  | Relb          | 1.365 |
| Tfeb          | 0.001 | 1.242 | 0.708  | 1.950  | 0.716  | 0.807  | 0.600  | 1.909  | 1.991  | Matk          | 1.364 |
| Gm42868       | 0.006 | 1.241 | 0.532  | 1.773  | 0.659  | 0.300  | 0.638  | 1.647  | 1.899  | Tfeb          | 1.363 |
| Rnf213        | 0.002 | 1.239 | 2.769  | 4.009  | 2.755  | 2.816  | 2.736  | 4.168  | 3.849  | mt-Rnr1       | 1.363 |
| Adgb          | 0.005 | 1.238 | 0.929  | 2.167  | 1.070  | 1.025  | 0.692  | 2.076  | 2.258  | Gm42868       | 1.357 |
| Fosb          | 0.003 | 1.236 | 8.872  | 10.109 | 8.973  | 8.652  | 8.992  | 10.067 | 10.151 | Parp3         | 1.357 |
| Parp3         | 0.001 | 1.235 | 0.237  | 1.473  | 0.260  | 0.303  | 0.148  | 1.381  | 1.564  | Aldh2         | 1.353 |
| mt-Rnr1       | 0.001 | 1.235 | 6.629  | 7.864  | 6.580  | 6.636  | 6.670  | 7.990  | 7.738  | Kras          | 1.351 |

|               |       |       |        |       |        |        |        |       |       |               |       |
|---------------|-------|-------|--------|-------|--------|--------|--------|-------|-------|---------------|-------|
| Kras          | 0.000 | 1.233 | 5.818  | 7.051 | 5.769  | 5.866  | 5.819  | 7.004 | 7.097 | Slc25a37      | 1.349 |
| Slc25a37      | 0.000 | 1.232 | 2.455  | 3.687 | 2.498  | 2.468  | 2.400  | 3.738 | 3.636 | Adgb          | 1.348 |
| 6230400D17Rik | 0.005 | 1.232 | 1.080  | 2.312 | 1.337  | 0.966  | 0.937  | 2.354 | 2.271 | Ccn1          | 1.347 |
| Ccn1          | 0.000 | 1.231 | 4.884  | 6.115 | 4.950  | 4.805  | 4.897  | 6.072 | 6.158 | Fam241a       | 1.346 |
| Gm43379       | 0.000 | 1.229 | -0.207 | 1.022 | -0.100 | -0.260 | -0.262 | 0.985 | 1.060 | Srrm4         | 1.346 |
| Hyal2         | 0.004 | 1.229 | 2.533  | 3.762 | 2.677  | 2.618  | 2.303  | 3.735 | 3.789 | Dll4          | 1.344 |
| Matk          | 0.006 | 1.228 | -0.087 | 1.141 | 0.019  | -0.200 | -0.081 | 0.926 | 1.356 | Fosb          | 1.344 |
| Fgf12         | 0.001 | 1.228 | 2.531  | 3.758 | 2.553  | 2.402  | 2.638  | 3.721 | 3.795 | Gm43379       | 1.342 |
| Srrm4         | 0.001 | 1.227 | 2.084  | 3.311 | 2.013  | 2.161  | 2.079  | 3.423 | 3.200 | Ankrd13b      | 1.339 |
| Dll4          | 0.001 | 1.226 | 1.201  | 2.426 | 1.273  | 1.107  | 1.221  | 2.545 | 2.308 | Fgf12         | 1.337 |
| Med13l        | 0.000 | 1.225 | 3.063  | 4.288 | 3.038  | 3.149  | 3.004  | 4.237 | 4.339 | Med13l        | 1.336 |
| Ankrd13b      | 0.000 | 1.223 | 3.580  | 4.803 | 3.609  | 3.581  | 3.550  | 4.709 | 4.898 | Hopx          | 1.332 |
| Tent5b        | 0.010 | 1.220 | -0.473 | 0.747 | -0.288 | -0.752 | -0.380 | 0.873 | 0.621 | Cpd           | 1.331 |
| Rbms2         | 0.004 | 1.219 | 2.657  | 3.876 | 2.708  | 2.813  | 2.450  | 3.946 | 3.806 | 6230400D17Rik | 1.331 |
| Snord58b      | 0.000 | 1.218 | 3.076  | 4.294 | 3.105  | 3.100  | 3.024  | 4.329 | 4.260 | Mllt6         | 1.330 |
| Fam241a       | 0.003 | 1.218 | 1.122  | 2.340 | 1.141  | 1.103  | 1.122  | 2.150 | 2.530 | Glul          | 1.330 |
| Prox1         | 0.000 | 1.217 | 4.280  | 5.497 | 4.274  | 4.335  | 4.232  | 5.446 | 5.549 | Hyal2         | 1.329 |
| Mreg          | 0.007 | 1.217 | 3.871  | 5.088 | 3.744  | 4.077  | 3.792  | 5.251 | 4.925 | Kcnq4         | 1.329 |
| Stk39         | 0.000 | 1.217 | 3.661  | 4.877 | 3.641  | 3.710  | 3.630  | 4.829 | 4.926 | Mreg          | 1.327 |
| Zdbf2         | 0.005 | 1.216 | 2.620  | 3.836 | 2.707  | 2.373  | 2.779  | 3.843 | 3.829 | Snord58b      | 1.326 |
| Hopx          | 0.003 | 1.215 | 6.680  | 7.895 | 6.601  | 6.800  | 6.638  | 8.052 | 7.737 | Trp53inp1     | 1.326 |
| Tpcn1         | 0.001 | 1.214 | 3.879  | 5.093 | 3.833  | 3.978  | 3.827  | 5.039 | 5.148 | Prox1         | 1.325 |
| Srcap         | 0.002 | 1.213 | -0.231 | 0.982 | -0.080 | -0.400 | -0.213 | 1.037 | 0.927 | Stk39         | 1.325 |
| Trp53inp1     | 0.002 | 1.213 | 4.958  | 6.172 | 4.916  | 4.896  | 5.063  | 6.309 | 6.034 | 2310040G24Rik | 1.320 |
| Rnase4        | 0.000 | 1.213 | 8.015  | 9.227 | 7.963  | 8.110  | 7.971  | 9.218 | 9.237 | Tpcn1         | 1.319 |
| Kcnq4         | 0.003 | 1.213 | 3.370  | 4.583 | 3.411  | 3.427  | 3.271  | 4.742 | 4.424 | Cyp4f16       | 1.319 |
| Foxo6         | 0.001 | 1.212 | 3.062  | 4.275 | 3.122  | 3.104  | 2.960  | 4.228 | 4.321 | Rbms2         | 1.318 |
| 2310040G24Rik | 0.001 | 1.212 | 2.236  | 3.448 | 2.207  | 2.340  | 2.161  | 3.348 | 3.549 | Tent5b        | 1.317 |
| Mllt6         | 0.002 | 1.212 | 4.049  | 5.262 | 4.100  | 4.051  | 3.998  | 5.102 | 5.421 | Foxo6         | 1.316 |
| Gpr157        | 0.007 | 1.209 | 2.820  | 4.028 | 2.833  | 3.044  | 2.582  | 3.968 | 4.089 | Rnase4        | 1.315 |
| Nphp3         | 0.006 | 1.208 | 1.829  | 3.037 | 1.897  | 1.587  | 2.002  | 2.973 | 3.101 | Srcap         | 1.311 |
| Cpd           | 0.006 | 1.208 | 5.334  | 6.542 | 5.291  | 5.449  | 5.260  | 6.330 | 6.753 | Cldn6         | 1.310 |
| 5430416N02Rik | 0.004 | 1.207 | 0.846  | 2.053 | 1.055  | 0.809  | 0.673  | 2.083 | 2.023 | Map3k21       | 1.309 |
| Glul          | 0.004 | 1.207 | 6.272  | 7.479 | 6.222  | 6.291  | 6.303  | 7.278 | 7.679 | Zdbf2         | 1.307 |
| Map3k21       | 0.000 | 1.207 | 2.303  | 3.510 | 2.307  | 2.272  | 2.331  | 3.557 | 3.463 | Gm15564       | 1.307 |
| Otoa          | 0.001 | 1.206 | 0.889  | 2.095 | 1.028  | 0.783  | 0.856  | 2.083 | 2.108 | Zfp236        | 1.307 |
| Cyp4f16       | 0.002 | 1.206 | 3.334  | 4.540 | 3.344  | 3.346  | 3.311  | 4.394 | 4.686 | Triobp        | 1.304 |
| Osgin1        | 0.004 | 1.206 | 3.856  | 5.061 | 3.875  | 3.654  | 4.038  | 5.125 | 4.997 | Gm43481       | 1.304 |
| Cldn6         | 0.004 | 1.204 | 2.893  | 4.097 | 2.886  | 3.020  | 2.773  | 4.244 | 3.950 | Otoa          | 1.302 |
| ENSMUSG000001 | 0.005 | 1.204 | 0.723  | 1.927 | 0.936  | 0.516  | 0.717  | 1.877 | 1.976 | Tcf4          | 1.301 |
| Triobp        | 0.000 | 1.204 | 2.259  | 3.462 | 2.288  | 2.238  | 2.250  | 3.500 | 3.424 | Stxbp6        | 1.301 |
| Gfra1         | 0.007 | 1.204 | -0.041 | 1.163 | 0.008  | -0.299 | 0.167  | 1.182 | 1.143 | Gm16001       | 1.300 |
| Stxbp6        | 0.000 | 1.203 | 3.056  | 4.258 | 2.982  | 3.111  | 3.074  | 4.224 | 4.293 | A330076H08Rik | 1.298 |
| Gm43481       | 0.001 | 1.201 | 2.524  | 3.726 | 2.473  | 2.575  | 2.525  | 3.627 | 3.824 | MIph          | 1.297 |
| Gm6225        | 0.002 | 1.201 | -0.004 | 1.196 | 0.128  | -0.022 | -0.119 | 1.268 | 1.124 | Nyap1         | 1.297 |
| Gm15564       | 0.005 | 1.200 | 5.676  | 6.875 | 5.538  | 5.783  | 5.706  | 7.042 | 6.708 | Nphp3         | 1.296 |
| Pcdhgb4       | 0.007 | 1.199 | -0.584 | 0.616 | -0.374 | -0.526 | -0.851 | 0.643 | 0.589 | Gm6225        | 1.296 |
| Gm16001       | 0.005 | 1.199 | 2.628  | 3.827 | 2.773  | 2.478  | 2.632  | 3.679 | 3.974 | Osgin1        | 1.295 |
| Tcf4          | 0.001 | 1.198 | 1.430  | 2.628 | 1.446  | 1.396  | 1.449  | 2.511 | 2.746 | 5430416N02Rik | 1.295 |
| Cebpd         | 0.000 | 1.197 | 4.043  | 5.240 | 4.098  | 3.979  | 4.051  | 5.233 | 5.247 | Mitf          | 1.294 |
| Wipf1         | 0.000 | 1.197 | 1.900  | 3.098 | 1.872  | 1.988  | 1.842  | 3.116 | 3.080 | Gpr157        | 1.294 |
| Srf           | 0.000 | 1.197 | 5.617  | 6.814 | 5.632  | 5.553  | 5.666  | 6.825 | 6.803 | Tmem181c-ps   | 1.293 |
| Hilpda        | 0.007 | 1.197 | 2.857  | 4.054 | 2.910  | 2.590  | 3.072  | 4.068 | 4.040 | Cebpd         | 1.292 |
| Pard3b        | 0.000 | 1.196 | 1.622  | 2.818 | 1.562  | 1.635  | 1.669  | 2.781 | 2.855 | Nav1          | 1.291 |
| Zfp236        | 0.004 | 1.196 | 3.942  | 5.138 | 3.890  | 4.025  | 3.912  | 5.318 | 4.958 | Srf           | 1.291 |
| Nav1          | 0.000 | 1.195 | 3.196  | 4.391 | 3.216  | 3.207  | 3.164  | 4.335 | 4.447 | Wipf1         | 1.291 |
| Nyap1         | 0.002 | 1.195 | 0.215  | 1.410 | 0.291  | 0.230  | 0.123  | 1.277 | 1.543 | Pard3b        | 1.290 |
| Gm43300       | 0.003 | 1.195 | 1.939  | 3.134 | 1.886  | 1.818  | 2.112  | 3.024 | 3.243 | ENSMUSG000001 | 1.289 |
| Mitf          | 0.001 | 1.194 | 1.798  | 2.992 | 1.742  | 1.842  | 1.810  | 2.877 | 3.107 | Lncppara      | 1.288 |
| Id2           | 0.006 | 1.192 | 2.651  | 3.843 | 2.833  | 2.717  | 2.402  | 3.828 | 3.858 | 1810034E14Rik | 1.287 |
| Nxpe4         | 0.002 | 1.191 | 1.352  | 2.542 | 1.187  | 1.391  | 1.476  | 2.574 | 2.511 | Gm43300       | 1.287 |
| Cadm4         | 0.002 | 1.190 | 2.915  | 4.106 | 2.811  | 3.055  | 2.880  | 4.022 | 4.189 | Gm27440       | 1.286 |
| Gm15893       | 0.008 | 1.190 | 1.463  | 2.654 | 1.647  | 1.201  | 1.542  | 2.563 | 2.744 | Gfra1         | 1.283 |
| Tmem181c-ps   | 0.010 | 1.190 | 4.151  | 5.341 | 3.945  | 4.240  | 4.268  | 5.140 | 5.542 | Mapkapk2      | 1.281 |
| Mapkapk2      | 0.000 | 1.189 | 4.742  | 5.931 | 4.812  | 4.683  | 4.730  | 5.991 | 5.870 | Rbm47         | 1.280 |
| Vash1         | 0.009 | 1.189 | 2.115  | 3.304 | 1.927  | 2.345  | 2.073  | 3.148 | 3.459 | Cadm4         | 1.280 |

|               |       |       |        |       |        |        |        |       |       |               |       |
|---------------|-------|-------|--------|-------|--------|--------|--------|-------|-------|---------------|-------|
| MIph          | 0.009 | 1.189 | 3.227  | 4.415 | 3.114  | 3.392  | 3.173  | 4.633 | 4.197 | Vash1         | 1.276 |
| Lncppara      | 0.004 | 1.187 | -0.560 | 0.627 | -0.652 | -0.465 | -0.562 | 0.463 | 0.791 | Ln timer      | 1.276 |
| Myom1         | 0.006 | 1.187 | -0.032 | 1.154 | 0.104  | -0.238 | 0.038  | 1.285 | 1.024 | Pcdhgb4       | 1.276 |
| Ln timer      | 0.000 | 1.186 | 3.111  | 4.297 | 3.055  | 3.166  | 3.113  | 4.360 | 4.235 | Nxpe4         | 1.275 |
| Tmc7          | 0.001 | 1.185 | 1.034  | 2.219 | 1.155  | 0.959  | 0.987  | 2.152 | 2.285 | Rps6ka6       | 1.274 |
| 1810034E14Rik | 0.005 | 1.185 | 2.213  | 3.398 | 2.087  | 2.275  | 2.277  | 3.217 | 3.579 | Myom1         | 1.274 |
| Gm27440       | 0.003 | 1.183 | 0.029  | 1.211 | 0.086  | 0.000  | 0.000  | 1.384 | 1.039 | Rbm3os        | 1.274 |
| Rbm3os        | 0.004 | 1.182 | 1.181  | 2.363 | 1.033  | 1.268  | 1.240  | 2.224 | 2.501 | Tmc7          | 1.272 |
| Igsf6         | 0.003 | 1.182 | 0.473  | 1.655 | 0.671  | 0.417  | 0.330  | 1.593 | 1.716 | Hilpda        | 1.271 |
| Rbm47         | 0.002 | 1.182 | 4.021  | 5.202 | 4.052  | 4.056  | 3.953  | 5.358 | 5.047 | Gm15893       | 1.267 |
| Rps6ka6       | 0.004 | 1.181 | 0.754  | 1.935 | 0.613  | 0.847  | 0.801  | 1.788 | 2.081 | Id2           | 1.267 |
| Tnrc18        | 0.001 | 1.181 | 3.999  | 5.179 | 3.980  | 4.091  | 3.924  | 5.111 | 5.247 | Tnrc18        | 1.267 |
| Fancc         | 0.004 | 1.180 | 1.003  | 2.184 | 0.886  | 0.923  | 1.202  | 2.085 | 2.283 | Sgcd          | 1.264 |
| Glo1          | 0.000 | 1.179 | 3.034  | 4.212 | 2.995  | 3.096  | 3.010  | 4.174 | 4.251 | Zfp964        | 1.264 |
| Vwa5b2        | 0.001 | 1.179 | 4.901  | 6.080 | 5.029  | 4.861  | 4.814  | 6.040 | 6.120 | Glo1          | 1.264 |
| Nr2f6         | 0.000 | 1.178 | 3.315  | 4.493 | 3.356  | 3.373  | 3.216  | 4.534 | 4.451 | Fancc         | 1.261 |
| A330076H08Rik | 0.010 | 1.177 | 5.726  | 6.903 | 5.679  | 5.777  | 5.722  | 6.640 | 7.166 | Rcor2         | 1.260 |
| Zfp964        | 0.001 | 1.175 | -0.133 | 1.041 | -0.110 | -0.115 | -0.174 | 0.927 | 1.155 | Nr2f6         | 1.260 |
| Rcor2         | 0.007 | 1.173 | 1.998  | 3.171 | 2.073  | 2.121  | 1.798  | 3.001 | 3.341 | Vwa5b2        | 1.260 |
| Notch1        | 0.000 | 1.173 | 3.116  | 4.289 | 3.119  | 3.152  | 3.078  | 4.242 | 4.336 | Igsf6         | 1.259 |
| Zfp868        | 0.002 | 1.172 | 4.118  | 5.290 | 4.105  | 3.996  | 4.252  | 5.229 | 5.351 | Ppm1h         | 1.256 |
| Podxl         | 0.006 | 1.171 | -0.350 | 0.821 | -0.168 | -0.390 | -0.491 | 0.669 | 0.973 | Notch1        | 1.255 |
| Sgcd          | 0.008 | 1.171 | 0.014  | 1.185 | -0.140 | 0.020  | 0.160  | 1.381 | 0.988 | Podxl         | 1.254 |
| Ppm1h         | 0.001 | 1.171 | 3.191  | 4.362 | 3.142  | 3.270  | 3.161  | 4.249 | 4.474 | Zfp868        | 1.249 |
| Jak3          | 0.007 | 1.170 | 2.443  | 3.613 | 2.524  | 2.600  | 2.206  | 3.728 | 3.498 | Hes6          | 1.248 |
| Gm19144       | 0.002 | 1.168 | 0.762  | 1.930 | 0.748  | 0.932  | 0.607  | 1.952 | 1.909 | Figl2         | 1.246 |
| Mapkapk5      | 0.001 | 1.167 | 0.351  | 1.518 | 0.471  | 0.310  | 0.271  | 1.539 | 1.496 | Plag1         | 1.244 |
| Hsf4          | 0.008 | 1.167 | 3.713  | 4.879 | 3.706  | 3.925  | 3.506  | 4.742 | 5.016 | Plppr3        | 1.244 |
| Plag1         | 0.000 | 1.166 | 1.705  | 2.871 | 1.756  | 1.704  | 1.653  | 2.828 | 2.914 | Thbd          | 1.243 |
| Plppr3        | 0.001 | 1.163 | 1.726  | 2.889 | 1.783  | 1.726  | 1.670  | 2.996 | 2.781 | Jak3          | 1.242 |
| Hes6          | 0.007 | 1.163 | 5.379  | 6.541 | 5.524  | 5.384  | 5.229  | 6.361 | 6.722 | Stox1         | 1.242 |
| Gm26789       | 0.000 | 1.160 | 0.482  | 1.642 | 0.445  | 0.472  | 0.530  | 1.695 | 1.590 | Mapkapk5      | 1.242 |
| Stox1         | 0.007 | 1.159 | 3.371  | 4.530 | 3.421  | 3.196  | 3.497  | 4.351 | 4.709 | Pex5l         | 1.241 |
| Gsto2         | 0.002 | 1.159 | 1.852  | 3.011 | 1.924  | 1.964  | 1.669  | 3.031 | 2.992 | Hsf4          | 1.239 |
| Pex5l         | 0.002 | 1.159 | 3.473  | 4.632 | 3.388  | 3.512  | 3.520  | 4.494 | 4.770 | Gm19144       | 1.238 |
| Thbd          | 0.005 | 1.157 | 3.296  | 4.454 | 3.234  | 3.424  | 3.231  | 4.277 | 4.630 | Lrrc36        | 1.237 |
| Mtmr11        | 0.001 | 1.157 | 3.112  | 4.269 | 3.205  | 3.045  | 3.085  | 4.211 | 4.326 | Gm13012       | 1.236 |
| Sephs2        | 0.000 | 1.154 | 4.157  | 5.311 | 4.205  | 4.173  | 4.093  | 5.286 | 5.336 | Gm26789       | 1.235 |
| Uhrf1bp1      | 0.001 | 1.154 | 3.107  | 4.261 | 3.111  | 3.135  | 3.076  | 4.166 | 4.356 | Arhgap23      | 1.232 |
| Lrrc36        | 0.004 | 1.153 | 3.356  | 4.509 | 3.338  | 3.279  | 3.451  | 4.341 | 4.678 | Slc25a25      | 1.230 |
| Arhgap23      | 0.002 | 1.153 | 2.343  | 3.496 | 2.412  | 2.334  | 2.283  | 3.363 | 3.629 | Uhrf1bp1      | 1.229 |
| Col20a1       | 0.000 | 1.153 | 2.421  | 3.574 | 2.427  | 2.405  | 2.431  | 3.524 | 3.624 | Mtmr11        | 1.229 |
| Dnah2         | 0.002 | 1.150 | 0.568  | 1.718 | 0.682  | 0.396  | 0.625  | 1.701 | 1.734 | Sephs2        | 1.225 |
| Fnip2         | 0.000 | 1.150 | 3.595  | 4.745 | 3.530  | 3.633  | 3.623  | 4.784 | 4.706 | Col20a1       | 1.224 |
| 4933431E20Rik | 0.006 | 1.148 | 0.844  | 1.992 | 0.819  | 1.045  | 0.668  | 1.889 | 2.095 | Gsto2         | 1.224 |
| Gm16185       | 0.000 | 1.148 | 2.992  | 4.140 | 2.901  | 3.023  | 3.052  | 4.135 | 4.145 | Fnip2         | 1.218 |
| Figl2         | 0.010 | 1.146 | 0.679  | 1.825 | 0.726  | 0.706  | 0.604  | 1.572 | 2.079 | Jund          | 1.216 |
| Epb41l1       | 0.001 | 1.145 | 2.453  | 3.598 | 2.399  | 2.579  | 2.383  | 3.648 | 3.548 | Slc25a20      | 1.216 |
| Gm43413       | 0.001 | 1.143 | 0.420  | 1.563 | 0.302  | 0.406  | 0.551  | 1.600 | 1.525 | Gm16185       | 1.213 |
| Gm13012       | 0.008 | 1.142 | -0.485 | 0.658 | -0.466 | -0.428 | -0.559 | 0.896 | 0.420 | Rfx6          | 1.212 |
| Gm42572       | 0.001 | 1.142 | 0.634  | 1.775 | 0.597  | 0.571  | 0.733  | 1.863 | 1.688 | Dnah2         | 1.211 |
| Slc25a25      | 0.009 | 1.142 | 4.524  | 5.666 | 4.532  | 4.422  | 4.619  | 5.893 | 5.438 | Vasn          | 1.210 |
| Vasn          | 0.003 | 1.141 | 4.433  | 5.573 | 4.371  | 4.558  | 4.369  | 5.704 | 5.443 | Gm43609       | 1.209 |
| Gm43609       | 0.006 | 1.140 | 1.477  | 2.617 | 1.641  | 1.425  | 1.364  | 2.462 | 2.772 | 4933431E20Rik | 1.209 |
| Jund          | 0.003 | 1.140 | 7.575  | 8.715 | 7.644  | 7.507  | 7.574  | 8.554 | 8.876 | Epb41l1       | 1.208 |
| Atad2b        | 0.001 | 1.140 | 2.071  | 3.211 | 2.125  | 2.136  | 1.952  | 3.210 | 3.212 | Gm42572       | 1.208 |
| Ptptr         | 0.002 | 1.139 | 2.614  | 3.753 | 2.718  | 2.532  | 2.594  | 3.655 | 3.852 | Apaf1         | 1.206 |
| Tle1          | 0.000 | 1.139 | 3.003  | 4.142 | 2.996  | 3.060  | 2.952  | 4.209 | 4.074 | Ptptr         | 1.204 |
| Rfx6          | 0.002 | 1.137 | 5.796  | 6.933 | 5.781  | 5.779  | 5.827  | 6.778 | 7.087 | Gm43413       | 1.204 |
| Apaf1         | 0.002 | 1.137 | 0.553  | 1.690 | 0.576  | 0.597  | 0.486  | 1.566 | 1.813 | Tle1          | 1.203 |
| Gpr142        | 0.005 | 1.136 | 4.231  | 5.367 | 4.269  | 4.053  | 4.371  | 5.254 | 5.480 | Zfp622        | 1.202 |
| Kctd20        | 0.000 | 1.135 | 4.541  | 5.676 | 4.548  | 4.540  | 4.535  | 5.730 | 5.623 | Atad2b        | 1.200 |
| Slc25a20      | 0.005 | 1.135 | 3.016  | 4.151 | 2.960  | 3.041  | 3.047  | 3.958 | 4.345 | Kctd20        | 1.198 |
| Atf5          | 0.000 | 1.135 | 7.853  | 8.988 | 7.779  | 7.875  | 7.904  | 9.039 | 8.936 | St14          | 1.198 |
| Zfp622        | 0.001 | 1.134 | 3.965  | 5.099 | 4.001  | 3.974  | 3.922  | 5.223 | 4.976 | Atf5          | 1.196 |
| Gm36936       | 0.002 | 1.132 | 1.800  | 2.932 | 1.669  | 1.852  | 1.878  | 3.036 | 2.827 | Nova2         | 1.195 |

|               |       |       |        |        |        |        |        |        |        |               |       |
|---------------|-------|-------|--------|--------|--------|--------|--------|--------|--------|---------------|-------|
| Fos           | 0.006 | 1.132 | 10.359 | 11.491 | 10.497 | 10.104 | 10.477 | 11.493 | 11.488 | Atat1         | 1.195 |
| 4921525O09Rik | 0.007 | 1.129 | 1.040  | 2.169  | 1.175  | 0.858  | 1.086  | 2.015  | 2.323  | Gpr142        | 1.195 |
| Atat1         | 0.002 | 1.129 | 3.934  | 5.063  | 3.955  | 3.868  | 3.978  | 4.927  | 5.199  | Rbm4          | 1.194 |
| Stt14         | 0.002 | 1.128 | 3.823  | 4.951  | 3.849  | 3.831  | 3.789  | 5.103  | 4.799  | Gm36936       | 1.193 |
| Shisa7        | 0.004 | 1.127 | -0.068 | 1.059  | -0.088 | 0.126  | -0.242 | 1.006  | 1.112  | Fzd8          | 1.192 |
| Cdk18         | 0.001 | 1.127 | 3.587  | 4.713  | 3.686  | 3.454  | 3.620  | 4.747  | 4.679  | 4921525O09Rik | 1.191 |
| Stap2         | 0.005 | 1.126 | 1.319  | 2.445  | 1.144  | 1.362  | 1.452  | 2.573  | 2.318  | Ulk1          | 1.187 |
| Ccrl2         | 0.000 | 1.124 | 2.763  | 3.887  | 2.770  | 2.727  | 2.793  | 3.947  | 3.827  | Dera          | 1.183 |
| Ier5          | 0.002 | 1.124 | 4.669  | 5.793  | 4.698  | 4.772  | 4.538  | 5.715  | 5.871  | Stap2         | 1.183 |
| Dera          | 0.001 | 1.123 | 1.144  | 2.267  | 1.192  | 1.132  | 1.108  | 2.173  | 2.362  | Ccrl2         | 1.181 |
| Rbm4          | 0.003 | 1.123 | 0.941  | 2.064  | 0.983  | 0.916  | 0.924  | 2.239  | 1.890  | Cdk18         | 1.179 |
| Ror2          | 0.000 | 1.123 | 4.607  | 5.730  | 4.570  | 4.690  | 4.562  | 5.748  | 5.711  | Ier5          | 1.177 |
| Fzd7          | 0.010 | 1.122 | 1.777  | 2.899  | 1.905  | 1.940  | 1.485  | 2.856  | 2.943  | Pde4c         | 1.177 |
| Fzd8          | 0.004 | 1.122 | 1.776  | 2.899  | 1.717  | 1.860  | 1.751  | 2.720  | 3.077  | Ror2          | 1.176 |
| Pde4c         | 0.000 | 1.122 | 3.113  | 4.235  | 3.191  | 3.068  | 3.081  | 4.185  | 4.286  | Zcchc2        | 1.175 |
| Dock9         | 0.001 | 1.120 | 3.289  | 4.409  | 3.206  | 3.412  | 3.249  | 4.465  | 4.353  | Fos           | 1.174 |
| Nova2         | 0.005 | 1.120 | 1.746  | 2.866  | 1.773  | 1.728  | 1.738  | 2.660  | 3.072  | Shisa7        | 1.174 |
| Sema3c        | 0.003 | 1.119 | 1.782  | 2.901  | 1.666  | 1.712  | 1.967  | 2.894  | 2.908  | Dock9         | 1.171 |
| Tmem147os     | 0.001 | 1.117 | 1.697  | 2.814  | 1.717  | 1.603  | 1.771  | 2.848  | 2.780  | Arhgef3       | 1.170 |
| 2610028D06Rik | 0.007 | 1.117 | -0.420 | 0.697  | -0.330 | -0.257 | -0.674 | 0.741  | 0.653  | Sirt6         | 1.170 |
| Zcchc2        | 0.001 | 1.117 | 4.296  | 5.413  | 4.270  | 4.330  | 4.289  | 5.299  | 5.527  | Tmem147os     | 1.167 |
| Rec8          | 0.004 | 1.116 | 2.557  | 3.673  | 2.411  | 2.710  | 2.549  | 3.563  | 3.783  | Bicra         | 1.167 |
| Bicra         | 0.000 | 1.116 | 2.280  | 3.396  | 2.325  | 2.258  | 2.256  | 3.397  | 3.395  | Fam110a       | 1.167 |
| Ciart         | 0.005 | 1.116 | 1.687  | 2.803  | 1.615  | 1.883  | 1.564  | 2.697  | 2.909  | Rec8          | 1.166 |
| Gm42913       | 0.000 | 1.115 | -0.372 | 0.743  | -0.328 | -0.448 | -0.340 | 0.729  | 0.758  | Lgr4          | 1.166 |
| Reep4         | 0.001 | 1.115 | 3.156  | 4.271  | 3.288  | 3.113  | 3.067  | 4.230  | 4.312  | Gm49492       | 1.165 |
| Lgr4          | 0.002 | 1.115 | 3.519  | 4.634  | 3.401  | 3.613  | 3.542  | 4.553  | 4.714  | Gm42913       | 1.165 |
| Kif17         | 0.002 | 1.115 | 0.520  | 1.635  | 0.393  | 0.653  | 0.513  | 1.564  | 1.706  | Gm43039       | 1.164 |
| Gm20701       | 0.008 | 1.114 | 0.250  | 1.364  | 0.389  | 0.384  | -0.022 | 1.387  | 1.342  | 2900026A02Rik | 1.164 |
| 2900026A02Rik | 0.000 | 1.114 | 3.849  | 4.964  | 3.811  | 3.935  | 3.801  | 4.925  | 5.002  | Sema3c        | 1.163 |
| Trpm4         | 0.001 | 1.114 | 1.112  | 2.226  | 1.163  | 0.993  | 1.181  | 2.229  | 2.224  | Kif17         | 1.163 |
| Arhgef3       | 0.004 | 1.114 | 2.858  | 3.972  | 2.784  | 3.000  | 2.791  | 4.118  | 3.826  | Ciart         | 1.162 |
| Gm43039       | 0.000 | 1.114 | 2.611  | 3.725  | 2.560  | 2.657  | 2.616  | 3.673  | 3.776  | Reep4         | 1.162 |
| Ulk1          | 0.007 | 1.114 | 4.409  | 5.523  | 4.358  | 4.484  | 4.385  | 5.305  | 5.740  | Vps37d        | 1.161 |
| Fam110a       | 0.001 | 1.114 | 4.055  | 5.169  | 4.099  | 3.986  | 4.080  | 5.260  | 5.078  | Trpm4         | 1.161 |
| Sirt6         | 0.002 | 1.113 | 3.875  | 4.988  | 3.976  | 3.832  | 3.817  | 4.858  | 5.118  | Ccdc162       | 1.160 |
| Ccdc162       | 0.001 | 1.110 | 3.844  | 4.954  | 3.875  | 3.774  | 3.884  | 4.877  | 5.032  | Slc22a21      | 1.158 |
| Gm49883       | 0.010 | 1.109 | 0.812  | 1.921  | 0.995  | 0.601  | 0.841  | 1.767  | 2.075  | Fzd7          | 1.157 |
| Slc22a21      | 0.010 | 1.109 | 1.257  | 2.365  | 1.299  | 1.050  | 1.421  | 2.201  | 2.530  | Gm49883       | 1.155 |
| Gm49492       | 0.008 | 1.107 | 2.135  | 3.242  | 2.035  | 2.298  | 2.073  | 3.050  | 3.434  | Bag3          | 1.155 |
| Usp10         | 0.002 | 1.106 | 3.215  | 4.320  | 3.137  | 3.340  | 3.167  | 4.402  | 4.239  | 2610028D06Rik | 1.153 |
| Slc2a13       | 0.006 | 1.105 | 4.167  | 5.272  | 3.961  | 4.387  | 4.154  | 5.228  | 5.316  | Usp10         | 1.152 |
| Bag3          | 0.004 | 1.103 | 4.831  | 5.935  | 4.790  | 4.746  | 4.958  | 6.081  | 5.788  | Pdk2          | 1.149 |
| Dynlt1b       | 0.005 | 1.102 | 4.428  | 5.530  | 4.485  | 4.592  | 4.208  | 5.549  | 5.512  | Gm20701       | 1.147 |
| Pcyox1l       | 0.003 | 1.100 | 2.349  | 3.449  | 2.297  | 2.498  | 2.251  | 3.345  | 3.554  | Pcyox1l       | 1.144 |
| Vps37d        | 0.005 | 1.099 | 3.141  | 4.240  | 3.130  | 3.117  | 3.176  | 4.041  | 4.438  | Ap1g2         | 1.143 |
| Mif4gd        | 0.007 | 1.098 | 3.869  | 4.967  | 3.918  | 4.011  | 3.678  | 4.832  | 5.102  | Stox2         | 1.141 |
| Hnrnpa0       | 0.001 | 1.097 | 5.791  | 6.888  | 5.836  | 5.842  | 5.694  | 6.803  | 6.973  | Hnrnpa0       | 1.141 |
| Tmem109       | 0.000 | 1.096 | 5.145  | 6.241  | 5.122  | 5.203  | 5.109  | 6.291  | 6.191  | Mif4gd        | 1.140 |
| Pdk2          | 0.004 | 1.096 | 4.339  | 5.434  | 4.422  | 4.301  | 4.293  | 5.274  | 5.595  | Dagla         | 1.139 |
| Sdc2          | 0.001 | 1.095 | 4.417  | 5.512  | 4.335  | 4.532  | 4.383  | 5.519  | 5.506  | Tmem109       | 1.138 |
| Pxn           | 0.001 | 1.095 | 2.362  | 3.457  | 2.267  | 2.444  | 2.375  | 3.368  | 3.547  | Pxn           | 1.138 |
| Stox2         | 0.002 | 1.094 | 2.923  | 4.016  | 2.870  | 2.958  | 2.941  | 4.140  | 3.893  | Slc2a13       | 1.136 |
| Myl12a        | 0.000 | 1.093 | 3.550  | 4.644  | 3.508  | 3.548  | 3.595  | 4.600  | 4.687  | Myl12a        | 1.134 |
| E2f5          | 0.003 | 1.093 | 3.986  | 5.079  | 4.094  | 4.025  | 3.838  | 4.986  | 5.171  | Dynlt1b       | 1.133 |
| Plxnb1        | 0.000 | 1.092 | 4.323  | 5.415  | 4.299  | 4.352  | 4.317  | 5.385  | 5.445  | Sdc2          | 1.133 |
| Gtpbp2        | 0.001 | 1.089 | 4.839  | 5.928  | 4.933  | 4.712  | 4.873  | 5.892  | 5.964  | Ppard         | 1.133 |
| Ap1g2         | 0.006 | 1.088 | 3.440  | 4.528  | 3.444  | 3.355  | 3.521  | 4.332  | 4.724  | Plxnb1        | 1.132 |
| Gm10524       | 0.001 | 1.088 | 4.341  | 5.429  | 4.263  | 4.410  | 4.350  | 5.334  | 5.523  | E2f5          | 1.132 |
| Ppard         | 0.004 | 1.088 | 3.008  | 4.096  | 3.124  | 2.968  | 2.931  | 4.245  | 3.946  | Ccdc160       | 1.130 |
| Ccdc160       | 0.009 | 1.088 | 0.995  | 2.083  | 0.970  | 0.842  | 1.174  | 1.915  | 2.251  | Gm10524       | 1.128 |
| Dnase2a       | 0.000 | 1.087 | 1.786  | 2.873  | 1.722  | 1.805  | 1.832  | 2.900  | 2.846  | Zfp791        | 1.126 |
| Map3k9        | 0.004 | 1.087 | 1.677  | 2.764  | 1.485  | 1.793  | 1.754  | 2.712  | 2.816  | Dnase2a       | 1.123 |
| Dagla         | 0.004 | 1.086 | 4.461  | 5.547  | 4.451  | 4.471  | 4.463  | 5.368  | 5.727  | Gtpbp2        | 1.123 |
| Tamalin       | 0.000 | 1.086 | 2.847  | 3.933  | 2.844  | 2.928  | 2.769  | 3.894  | 3.971  | Map4          | 1.123 |
| Map4          | 0.000 | 1.085 | 3.817  | 4.902  | 3.802  | 3.822  | 3.825  | 4.860  | 4.944  | Bmi1          | 1.121 |

|               |       |       |        |        |        |        |        |        |        |               |       |
|---------------|-------|-------|--------|--------|--------|--------|--------|--------|--------|---------------|-------|
| Zfp791        | 0.003 | 1.085 | 1.571  | 2.657  | 1.686  | 1.533  | 1.494  | 2.538  | 2.776  | Tamalin       | 1.121 |
| Bmi1          | 0.000 | 1.085 | 5.222  | 6.306  | 5.179  | 5.260  | 5.226  | 6.257  | 6.355  | Irf2bp2       | 1.119 |
| Irf2bp2       | 0.000 | 1.084 | 5.844  | 6.928  | 5.871  | 5.812  | 5.851  | 6.935  | 6.921  | Scrn2         | 1.119 |
| Gm13577       | 0.001 | 1.083 | 2.224  | 3.307  | 2.148  | 2.202  | 2.322  | 3.304  | 3.310  | mt-Nd2        | 1.119 |
| Nudt12        | 0.002 | 1.083 | 1.980  | 3.062  | 1.894  | 2.097  | 1.948  | 2.982  | 3.142  | Galns         | 1.118 |
| Mpzl1         | 0.000 | 1.082 | 4.174  | 5.256  | 4.246  | 4.133  | 4.143  | 5.241  | 5.271  | Gm43328       | 1.118 |
| Gbp9          | 0.004 | 1.081 | 3.940  | 5.021  | 3.867  | 4.091  | 3.861  | 5.141  | 4.901  | Gbp9          | 1.117 |
| mt-Nd2        | 0.010 | 1.080 | 10.482 | 11.563 | 10.621 | 10.281 | 10.546 | 11.734 | 11.391 | Nudt12        | 1.117 |
| Wdsub1        | 0.001 | 1.079 | 3.870  | 4.949  | 3.974  | 3.824  | 3.811  | 4.928  | 4.970  | Grhl1         | 1.117 |
| Apobec3       | 0.000 | 1.079 | 1.600  | 2.679  | 1.626  | 1.576  | 1.600  | 2.626  | 2.732  | Nectin1       | 1.117 |
| Capn15        | 0.000 | 1.079 | 3.672  | 4.751  | 3.644  | 3.681  | 3.692  | 4.771  | 4.731  | Gm13577       | 1.116 |
| Appl2         | 0.005 | 1.078 | 5.134  | 6.213  | 5.115  | 5.321  | 4.968  | 6.120  | 6.305  | Map3k9        | 1.116 |
| Scrn2         | 0.004 | 1.078 | 2.261  | 3.339  | 2.326  | 2.149  | 2.308  | 3.195  | 3.483  | Mpzl1         | 1.116 |
| Nectin1       | 0.002 | 1.078 | 2.259  | 3.337  | 2.181  | 2.251  | 2.345  | 3.209  | 3.465  | Foxred2       | 1.115 |
| Cd151         | 0.000 | 1.077 | 4.132  | 5.209  | 4.153  | 4.104  | 4.140  | 5.169  | 5.249  | Apobec3       | 1.113 |
| Zfp839        | 0.003 | 1.077 | 3.097  | 4.174  | 3.018  | 3.278  | 2.994  | 4.122  | 4.226  | Ints7         | 1.113 |
| Galns         | 0.003 | 1.076 | 4.617  | 5.692  | 4.669  | 4.550  | 4.632  | 5.545  | 5.840  | Capn15        | 1.112 |
| Grhl1         | 0.002 | 1.075 | 3.789  | 4.864  | 3.757  | 3.821  | 3.790  | 5.012  | 4.716  | Chka          | 1.111 |
| Gm43328       | 0.006 | 1.075 | 1.501  | 2.576  | 1.386  | 1.585  | 1.533  | 2.748  | 2.403  | Cd151         | 1.111 |
| Zcchc14       | 0.001 | 1.074 | 4.414  | 5.488  | 4.384  | 4.528  | 4.330  | 5.477  | 5.500  | Wdsub1        | 1.110 |
| Met           | 0.006 | 1.073 | 2.805  | 3.878  | 2.755  | 2.973  | 2.687  | 4.018  | 3.738  | Nudt4         | 1.109 |
| Btg3          | 0.003 | 1.072 | 1.912  | 2.984  | 2.006  | 1.798  | 1.933  | 3.106  | 2.862  | Csnk1e        | 1.106 |
| Slc26a1       | 0.002 | 1.072 | 2.389  | 3.460  | 2.509  | 2.287  | 2.370  | 3.366  | 3.555  | Met           | 1.106 |
| Nudt4         | 0.004 | 1.071 | 5.042  | 6.113  | 4.941  | 5.069  | 5.116  | 5.968  | 6.258  | Btg3          | 1.106 |
| Kcnmb2        | 0.003 | 1.071 | 5.707  | 6.778  | 5.631  | 5.881  | 5.609  | 6.758  | 6.798  | Appl2         | 1.105 |
| Prr7          | 0.006 | 1.070 | 1.938  | 3.008  | 2.077  | 2.029  | 1.708  | 2.965  | 3.052  | Zfp839        | 1.102 |
| Ints7         | 0.009 | 1.070 | 2.582  | 3.651  | 2.721  | 2.555  | 2.469  | 3.454  | 3.848  | Zcchc14       | 1.102 |
| Gm47950       | 0.001 | 1.069 | 2.348  | 3.417  | 2.328  | 2.480  | 2.235  | 3.414  | 3.419  | Slc26a1       | 1.102 |
| Chka          | 0.004 | 1.068 | 4.638  | 5.707  | 4.599  | 4.683  | 4.634  | 5.876  | 5.538  | Pabpc1l       | 1.100 |
| Foxred2       | 0.005 | 1.068 | 3.290  | 4.358  | 3.274  | 3.334  | 3.262  | 4.168  | 4.549  | Atxn7         | 1.097 |
| Atxn7         | 0.000 | 1.067 | 3.896  | 4.963  | 3.891  | 3.867  | 3.930  | 4.900  | 5.027  | Gm44550       | 1.095 |
| Gm44550       | 0.004 | 1.067 | 0.153  | 1.221  | -0.010 | 0.253  | 0.217  | 1.328  | 1.113  | Kcnmb2        | 1.093 |
| Pabpc1l       | 0.001 | 1.066 | 1.356  | 2.421  | 1.323  | 1.357  | 1.387  | 2.299  | 2.544  | Gm47950       | 1.092 |
| Ppp1r15a      | 0.007 | 1.065 | 7.465  | 8.531  | 7.554  | 7.227  | 7.615  | 8.501  | 8.561  | Pm20d2        | 1.088 |
| Gm15567       | 0.004 | 1.064 | 0.420  | 1.484  | 0.578  | 0.247  | 0.435  | 1.545  | 1.424  | Prr7          | 1.087 |
| Csnk1e        | 0.006 | 1.063 | 2.610  | 3.673  | 2.580  | 2.682  | 2.569  | 3.481  | 3.865  | Nfic          | 1.087 |
| Nfic          | 0.000 | 1.062 | 4.899  | 5.961  | 4.832  | 4.953  | 4.911  | 5.958  | 5.964  | Zfhx2         | 1.086 |
| Slc22a5       | 0.001 | 1.062 | 3.266  | 4.328  | 3.217  | 3.379  | 3.202  | 4.343  | 4.312  | Ckap4         | 1.086 |
| C1qtnf6       | 0.005 | 1.062 | 2.677  | 3.739  | 2.862  | 2.651  | 2.518  | 3.677  | 3.801  | Slc22a5       | 1.084 |
| Zfhx2         | 0.000 | 1.061 | 4.427  | 5.487  | 4.453  | 4.457  | 4.370  | 5.457  | 5.518  | Gm15567       | 1.084 |
| Ckap4         | 0.000 | 1.059 | 4.403  | 5.462  | 4.396  | 4.393  | 4.420  | 5.527  | 5.397  | Proser1       | 1.084 |
| Proser1       | 0.001 | 1.059 | 2.871  | 3.929  | 2.929  | 2.803  | 2.880  | 3.865  | 3.994  | Brpf3         | 1.084 |
| Pm20d2        | 0.001 | 1.058 | 2.730  | 3.788  | 2.755  | 2.772  | 2.663  | 3.677  | 3.900  | Wnk4          | 1.082 |
| Zc3h11a       | 0.001 | 1.057 | 2.286  | 3.343  | 2.185  | 2.346  | 2.327  | 3.354  | 3.333  | Foxo1         | 1.082 |
| Hps4          | 0.000 | 1.057 | 3.757  | 4.814  | 3.793  | 3.682  | 3.795  | 4.826  | 4.801  | Ctsz          | 1.082 |
| Marchf7       | 0.000 | 1.057 | 3.855  | 4.912  | 3.891  | 3.810  | 3.863  | 4.869  | 4.954  | Marchf7       | 1.081 |
| Ctsz          | 0.003 | 1.055 | 5.217  | 6.272  | 5.098  | 5.314  | 5.239  | 6.397  | 6.148  | Hps4          | 1.079 |
| C1qtnf12      | 0.000 | 1.054 | 3.863  | 4.917  | 3.903  | 3.885  | 3.801  | 4.958  | 4.876  | C1qtnf6       | 1.079 |
| Brpf3         | 0.003 | 1.054 | 4.135  | 5.189  | 4.107  | 4.231  | 4.066  | 5.046  | 5.332  | Ppp1r15a      | 1.079 |
| Fubp1         | 0.000 | 1.054 | 4.442  | 5.496  | 4.466  | 4.414  | 4.447  | 5.430  | 5.563  | Zc3h11a       | 1.079 |
| Snhg16        | 0.004 | 1.054 | 0.147  | 1.201  | 0.306  | -0.048 | 0.183  | 1.234  | 1.167  | Fubp1         | 1.078 |
| Helz2         | 0.003 | 1.053 | 2.375  | 3.429  | 2.461  | 2.246  | 2.419  | 3.542  | 3.316  | Camkk2        | 1.078 |
| Rassf6        | 0.001 | 1.053 | 2.216  | 3.269  | 2.290  | 2.129  | 2.228  | 3.319  | 3.220  | Helz2         | 1.078 |
| Stard13       | 0.002 | 1.053 | 3.593  | 4.646  | 3.645  | 3.451  | 3.684  | 4.601  | 4.691  | C1qtnf12      | 1.076 |
| Foxo1         | 0.003 | 1.051 | 3.456  | 4.507  | 3.494  | 3.453  | 3.421  | 4.359  | 4.654  | Rassf6        | 1.074 |
| Camkk2        | 0.002 | 1.050 | 2.333  | 3.382  | 2.387  | 2.307  | 2.304  | 3.253  | 3.512  | Pprc1         | 1.074 |
| mt-Nd4        | 0.004 | 1.049 | 10.384 | 11.434 | 10.444 | 10.212 | 10.496 | 11.504 | 11.363 | Zfp362        | 1.074 |
| Tet3          | 0.001 | 1.049 | 2.342  | 3.391  | 2.370  | 2.239  | 2.416  | 3.327  | 3.455  | Mnt           | 1.072 |
| Wnk4          | 0.005 | 1.048 | 4.683  | 5.732  | 4.749  | 4.633  | 4.668  | 5.559  | 5.904  | 1110018N20Rik | 1.072 |
| 1110018N20Rik | 0.001 | 1.048 | 2.922  | 3.970  | 2.944  | 2.912  | 2.909  | 3.880  | 4.060  | Rxra          | 1.071 |
| Nod1          | 0.001 | 1.047 | 4.264  | 5.311  | 4.299  | 4.363  | 4.129  | 5.329  | 5.292  | Stard13       | 1.071 |
| Rxra          | 0.001 | 1.046 | 3.344  | 4.391  | 3.342  | 3.365  | 3.325  | 4.278  | 4.503  | 4932442E05Rik | 1.070 |
| Mnt           | 0.004 | 1.046 | 4.104  | 5.150  | 4.129  | 4.182  | 4.002  | 5.294  | 5.007  | Tet3          | 1.069 |
| Pprc1         | 0.003 | 1.046 | 3.285  | 4.331  | 3.239  | 3.263  | 3.354  | 4.477  | 4.185  | Acsl6         | 1.067 |
| 4932442E05Rik | 0.002 | 1.046 | 2.080  | 3.125  | 2.161  | 2.063  | 2.015  | 2.998  | 3.252  | Snhg16        | 1.066 |
| Tmcc3         | 0.000 | 1.045 | 2.939  | 3.984  | 2.896  | 2.971  | 2.949  | 3.962  | 4.006  | mt-Nd4        | 1.065 |

|               |       |       |        |       |        |        |        |       |       |               |       |
|---------------|-------|-------|--------|-------|--------|--------|--------|-------|-------|---------------|-------|
| Acsl6         | 0.001 | 1.045 | 1.823  | 2.868 | 1.776  | 1.859  | 1.834  | 2.775 | 2.961 | Tmcc3         | 1.063 |
| Zfp362        | 0.004 | 1.044 | 3.922  | 4.965 | 3.908  | 3.987  | 3.870  | 4.800 | 5.130 | Gpam          | 1.063 |
| Sdr42e1       | 0.007 | 1.043 | 0.843  | 1.886 | 0.672  | 0.857  | 0.998  | 2.013 | 1.758 | Lap3          | 1.062 |
| Impg2         | 0.005 | 1.042 | -0.367 | 0.675 | -0.557 | -0.193 | -0.351 | 0.640 | 0.710 | Nod1          | 1.062 |
| Lap3          | 0.001 | 1.042 | 4.616  | 5.658 | 4.600  | 4.676  | 4.572  | 5.752 | 5.564 | Sdr42e1       | 1.060 |
| Ncor2         | 0.001 | 1.042 | 5.032  | 6.073 | 5.010  | 5.146  | 4.939  | 6.124 | 6.022 | Ino80d        | 1.060 |
| Plch1         | 0.001 | 1.041 | 2.765  | 3.806 | 2.717  | 2.852  | 2.727  | 3.755 | 3.858 | Zfp608        | 1.057 |
| Ino80d        | 0.000 | 1.040 | 2.881  | 3.922 | 2.895  | 2.877  | 2.872  | 3.845 | 3.999 | Plch1         | 1.057 |
| Ell2          | 0.001 | 1.040 | 4.436  | 5.476 | 4.381  | 4.369  | 4.557  | 5.424 | 5.528 | Pgghg         | 1.056 |
| Gm42659       | 0.003 | 1.039 | 1.282  | 2.322 | 1.138  | 1.450  | 1.259  | 2.326 | 2.317 | Ncor2         | 1.056 |
| Tssk6         | 0.001 | 1.039 | 0.558  | 1.597 | 0.489  | 0.499  | 0.686  | 1.625 | 1.568 | Osbpl3        | 1.055 |
| Gpam          | 0.003 | 1.038 | 3.197  | 4.235 | 3.248  | 3.184  | 3.160  | 4.085 | 4.384 | Ell2          | 1.054 |
| Zfp608        | 0.004 | 1.037 | 2.697  | 3.735 | 2.808  | 2.687  | 2.597  | 3.603 | 3.866 | Ltbp3         | 1.054 |
| Furin         | 0.001 | 1.037 | 3.697  | 4.733 | 3.606  | 3.774  | 3.710  | 4.747 | 4.719 | C1galt1       | 1.051 |
| Gss           | 0.000 | 1.036 | 2.790  | 3.826 | 2.746  | 2.868  | 2.757  | 3.820 | 3.832 | Tssk6         | 1.051 |
| C1galt1       | 0.000 | 1.035 | 4.837  | 5.872 | 4.816  | 4.822  | 4.872  | 5.811 | 5.933 | Furin         | 1.049 |
| Lrrc38        | 0.001 | 1.035 | 2.554  | 3.589 | 2.564  | 2.644  | 2.455  | 3.528 | 3.651 | Gss           | 1.049 |
| Slc39a11      | 0.000 | 1.035 | 4.453  | 5.488 | 4.399  | 4.539  | 4.421  | 5.514 | 5.463 | Impg2         | 1.049 |
| Gm5898        | 0.003 | 1.035 | 0.527  | 1.562 | 0.694  | 0.488  | 0.400  | 1.552 | 1.572 | Lrrc38        | 1.048 |
| Ky            | 0.000 | 1.034 | 4.252  | 5.286 | 4.207  | 4.310  | 4.240  | 5.299 | 5.273 | Slc39a11      | 1.048 |
| Mtss2         | 0.002 | 1.033 | 4.330  | 5.363 | 4.372  | 4.176  | 4.443  | 5.347 | 5.379 | Gm42659       | 1.047 |
| Lpcat4        | 0.003 | 1.033 | 2.156  | 3.189 | 2.235  | 1.984  | 2.249  | 3.126 | 3.251 | Ky            | 1.047 |
| Ltbp3         | 0.002 | 1.033 | 4.160  | 5.193 | 4.142  | 4.196  | 4.142  | 5.063 | 5.323 | Tox3          | 1.046 |
| Casp8         | 0.001 | 1.032 | 3.125  | 4.157 | 3.184  | 3.192  | 2.999  | 4.103 | 4.211 | Zfpm1         | 1.045 |
| Hmgcr         | 0.001 | 1.031 | 4.820  | 5.852 | 4.759  | 4.959  | 4.742  | 5.873 | 5.830 | Casp8         | 1.042 |
| Tox3          | 0.001 | 1.031 | 5.285  | 6.316 | 5.281  | 5.329  | 5.244  | 6.234 | 6.397 | Acot6         | 1.042 |
| C77080        | 0.005 | 1.030 | 5.353  | 6.384 | 5.243  | 5.545  | 5.272  | 6.289 | 6.479 | Gm5898        | 1.041 |
| Poglut2       | 0.006 | 1.030 | 2.334  | 3.364 | 2.369  | 2.507  | 2.125  | 3.398 | 3.329 | Lpcat4        | 1.040 |
| mt-Tp         | 0.002 | 1.030 | 7.940  | 8.969 | 8.106  | 7.844  | 7.869  | 8.948 | 8.990 | Mtss2         | 1.040 |
| Zfpm1         | 0.001 | 1.030 | 1.612  | 2.642 | 1.561  | 1.628  | 1.648  | 2.735 | 2.549 | Hmgcr         | 1.039 |
| Dbndd1        | 0.001 | 1.029 | 1.006  | 2.035 | 1.102  | 1.018  | 0.898  | 2.051 | 2.019 | Rgs19         | 1.039 |
| Arid1a        | 0.001 | 1.028 | 4.729  | 5.758 | 4.687  | 4.818  | 4.683  | 5.712 | 5.804 | Kmt2a         | 1.039 |
| Pgghg         | 0.005 | 1.028 | 3.988  | 5.016 | 3.976  | 4.008  | 3.980  | 4.830 | 5.202 | Arid1a        | 1.039 |
| Osbpl3        | 0.006 | 1.027 | 1.723  | 2.750 | 1.757  | 1.700  | 1.713  | 2.556 | 2.944 | E330037G11Rik | 1.039 |
| Crls1         | 0.000 | 1.027 | 4.564  | 5.590 | 4.518  | 4.555  | 4.619  | 5.622 | 5.558 | C77080        | 1.038 |
| Rgs19         | 0.009 | 1.025 | 1.674  | 2.700 | 1.749  | 1.787  | 1.486  | 2.542 | 2.857 | Cbl1          | 1.037 |
| Tmem151a      | 0.008 | 1.025 | 1.478  | 2.503 | 1.641  | 1.557  | 1.236  | 2.476 | 2.530 | Dbndd1        | 1.037 |
| E330037G11Rik | 0.002 | 1.024 | 0.515  | 1.539 | 0.443  | 0.579  | 0.524  | 1.655 | 1.424 | Crls1         | 1.037 |
| Slc7a2        | 0.002 | 1.023 | 6.056  | 7.079 | 6.015  | 6.201  | 5.952  | 7.035 | 7.123 | Insm1         | 1.036 |
| Acot6         | 0.006 | 1.023 | 1.042  | 2.065 | 1.063  | 1.134  | 0.928  | 1.901 | 2.229 | Wiz           | 1.035 |
| Insm1         | 0.001 | 1.023 | 7.283  | 8.306 | 7.310  | 7.307  | 7.233  | 8.205 | 8.408 | mt-Tp         | 1.035 |
| Slc66a2       | 0.001 | 1.022 | 3.291  | 4.313 | 3.273  | 3.222  | 3.378  | 4.397 | 4.228 | Slc66a2       | 1.033 |
| Tob1          | 0.000 | 1.022 | 6.779  | 7.800 | 6.779  | 6.733  | 6.824  | 7.866 | 7.735 | Rab11fip2     | 1.032 |
| Kmt2a         | 0.002 | 1.021 | 4.502  | 5.523 | 4.500  | 4.523  | 4.483  | 5.387 | 5.660 | Tob1          | 1.032 |
| Rab11fip2     | 0.001 | 1.021 | 3.436  | 4.457 | 3.468  | 3.442  | 3.398  | 4.548 | 4.365 | Poglut2       | 1.030 |
| Gm37891       | 0.000 | 1.019 | 1.666  | 2.685 | 1.624  | 1.710  | 1.662  | 2.753 | 2.617 | Pip4k2a       | 1.029 |
| Cbl1          | 0.005 | 1.019 | 3.521  | 4.540 | 3.519  | 3.606  | 3.438  | 4.379 | 4.702 | Gm37891       | 1.028 |
| Lhfp15        | 0.006 | 1.019 | 2.872  | 3.891 | 3.053  | 2.871  | 2.691  | 3.826 | 3.955 | Slc7a2        | 1.028 |
| Rcor1         | 0.001 | 1.019 | 4.391  | 5.409 | 4.328  | 4.495  | 4.349  | 5.462 | 5.356 | Pitpnc1       | 1.027 |
| Mideas        | 0.000 | 1.017 | 3.330  | 4.347 | 3.360  | 3.322  | 3.308  | 4.418 | 4.277 | Mideas        | 1.026 |
| Pitpnc1       | 0.001 | 1.017 | 4.035  | 5.051 | 4.021  | 4.009  | 4.075  | 4.958 | 5.145 | Rcor1         | 1.025 |
| Naprt         | 0.001 | 1.016 | 2.529  | 3.545 | 2.472  | 2.609  | 2.507  | 3.458 | 3.633 | Naprt         | 1.025 |
| Ahdc1         | 0.001 | 1.015 | 3.135  | 4.151 | 3.214  | 3.172  | 3.020  | 4.098 | 4.203 | Bag2          | 1.024 |
| Wiz           | 0.005 | 1.015 | 3.825  | 4.840 | 3.854  | 3.807  | 3.814  | 4.665 | 5.015 | Reps2         | 1.021 |
| Synpr         | 0.000 | 1.015 | 4.702  | 5.717 | 4.627  | 4.716  | 4.763  | 5.687 | 5.747 | Tph1          | 1.021 |
| Med26         | 0.003 | 1.014 | 3.087  | 4.101 | 3.139  | 2.948  | 3.173  | 4.017 | 4.185 | Tmem151a      | 1.020 |
| Tph1          | 0.003 | 1.014 | 8.023  | 9.037 | 8.013  | 7.924  | 8.131  | 8.931 | 9.142 | Nrep          | 1.020 |
| Pip4k2a       | 0.002 | 1.014 | 3.168  | 4.182 | 3.154  | 3.178  | 3.172  | 4.041 | 4.322 | Ahdc1         | 1.020 |
| Nrep          | 0.001 | 1.013 | 3.022  | 4.035 | 3.065  | 3.021  | 2.981  | 3.963 | 4.107 | Synpr         | 1.019 |
| Adgra3        | 0.005 | 1.012 | 1.517  | 2.529 | 1.503  | 1.669  | 1.378  | 2.416 | 2.641 | Agap1         | 1.019 |
| Agap1         | 0.003 | 1.011 | 3.011  | 4.022 | 2.919  | 3.121  | 2.994  | 4.142 | 3.903 | Med26         | 1.019 |
| Acads         | 0.000 | 1.011 | 3.860  | 4.871 | 3.913  | 3.824  | 3.843  | 4.825 | 4.917 | Lhfp15        | 1.018 |
| Pcgf2         | 0.002 | 1.010 | 3.513  | 4.523 | 3.543  | 3.575  | 3.421  | 4.422 | 4.624 | Pcgf2         | 1.017 |
| Reps2         | 0.003 | 1.009 | 4.199  | 5.208 | 4.157  | 4.277  | 4.163  | 5.066 | 5.351 | Adgra3        | 1.016 |
| Pard6b        | 0.010 | 1.009 | 2.572  | 3.581 | 2.405  | 2.799  | 2.511  | 3.479 | 3.683 | Acads         | 1.015 |
| Rhobtb3       | 0.002 | 1.009 | 3.246  | 4.255 | 3.174  | 3.361  | 3.203  | 4.185 | 4.324 | Il17d         | 1.013 |

|               |       |       |        |        |        |        |        |        |        |               |       |
|---------------|-------|-------|--------|--------|--------|--------|--------|--------|--------|---------------|-------|
| Hdac6         | 0.000 | 1.008 | 4.775  | 5.783  | 4.842  | 4.745  | 4.737  | 5.734  | 5.833  | Adck5         | 1.012 |
| Il17d         | 0.001 | 1.008 | 3.561  | 4.569  | 3.567  | 3.602  | 3.513  | 4.490  | 4.648  | Hdac6         | 1.012 |
| Trim65        | 0.002 | 1.008 | 1.238  | 2.245  | 1.360  | 1.086  | 1.267  | 2.232  | 2.258  | Zswim4        | 1.011 |
| Adck5         | 0.001 | 1.007 | 5.151  | 6.159  | 5.077  | 5.203  | 5.174  | 6.080  | 6.238  | Itpkc         | 1.011 |
| Bag2          | 0.006 | 1.005 | 4.871  | 5.877  | 4.904  | 4.813  | 4.896  | 6.067  | 5.686  | Rhobtb3       | 1.011 |
| Pisd          | 0.001 | 1.005 | 2.418  | 3.423  | 2.417  | 2.337  | 2.501  | 3.349  | 3.498  | Gm48677       | 1.008 |
| Dnpep         | 0.000 | 1.005 | 5.250  | 6.254  | 5.244  | 5.310  | 5.195  | 6.301  | 6.208  | Pisd          | 1.007 |
| Zswim4        | 0.006 | 1.005 | 2.848  | 3.852  | 2.909  | 2.702  | 2.932  | 3.708  | 3.996  | Dnpep         | 1.006 |
| Zxdc          | 0.000 | 1.004 | 3.436  | 4.440  | 3.504  | 3.418  | 3.386  | 4.478  | 4.402  | Rel2          | 1.006 |
| Mink1         | 0.003 | 1.004 | 4.647  | 5.650  | 4.690  | 4.764  | 4.487  | 5.616  | 5.685  | Tmsb10        | 1.006 |
| Smad5         | 0.000 | 1.003 | 4.586  | 5.589  | 4.571  | 4.615  | 4.571  | 5.565  | 5.613  | Retreg1       | 1.005 |
| Tmsb10        | 0.006 | 1.003 | 3.687  | 4.690  | 3.832  | 3.546  | 3.684  | 4.560  | 4.821  | Zxdc          | 1.005 |
| Itpkc         | 0.004 | 1.003 | 1.781  | 2.783  | 1.786  | 1.696  | 1.860  | 2.925  | 2.642  | Smad5         | 1.005 |
| Cdk12         | 0.000 | 1.003 | 3.146  | 4.148  | 3.202  | 3.073  | 3.162  | 4.129  | 4.168  | Trim65        | 1.005 |
| Ntn3          | 0.005 | 1.002 | -0.136 | 0.866  | 0.048  | -0.300 | -0.155 | 0.862  | 0.871  | Pard6b        | 1.004 |
| Rel2          | 0.006 | 1.001 | -0.110 | 0.891  | -0.234 | 0.024  | -0.119 | 1.034  | 0.747  | Rpa1          | 1.003 |
| Rpa1          | 0.001 | 1.001 | 5.110  | 6.111  | 5.047  | 5.120  | 5.163  | 6.035  | 6.187  | Cdk12         | 1.002 |
| Spsb2         | 0.001 | 1.000 | 4.121  | 5.121  | 4.171  | 4.159  | 4.033  | 5.030  | 5.212  | Spsb2         | 1.002 |
| Trp53cor1     | 0.000 | 1.000 | 0.108  | 1.108  | 0.111  | 0.113  | 0.101  | 1.054  | 1.163  | Trp53cor1     | 1.001 |
| Gse1          | 0.001 | 0.999 | 4.410  | 5.409  | 4.405  | 4.499  | 4.326  | 5.382  | 5.436  | A230083G16Rik | 1.001 |
| A230083G16Rik | 0.003 | 0.999 | 2.948  | 3.947  | 3.045  | 2.964  | 2.836  | 3.838  | 4.057  | Bahcc1        | 1.000 |
| B4galt1       | 0.000 | 0.999 | 4.113  | 5.112  | 4.060  | 4.193  | 4.086  | 5.119  | 5.104  | Mink1         | 0.999 |
| Bahcc1        | 0.004 | 0.998 | 2.089  | 3.087  | 1.951  | 2.172  | 2.143  | 2.971  | 3.202  | Map3k14       | 0.997 |
| Citrn         | 0.000 | 0.998 | 9.179  | 10.177 | 9.197  | 9.120  | 9.222  | 10.151 | 10.204 | Citrn         | 0.997 |
| Slc1a4        | 0.000 | 0.997 | 3.864  | 4.862  | 3.777  | 3.926  | 3.889  | 4.877  | 4.846  | Gse1          | 0.997 |
| Gm43759       | 0.009 | 0.996 | 2.204  | 3.200  | 2.097  | 2.077  | 2.438  | 3.276  | 3.124  | B4galt1       | 0.996 |
| Snx24         | 0.000 | 0.996 | 3.832  | 4.828  | 3.753  | 3.856  | 3.888  | 4.809  | 4.848  | Arhgap17      | 0.995 |
| Arhgap17      | 0.007 | 0.996 | 2.834  | 3.830  | 2.714  | 3.001  | 2.787  | 3.699  | 3.962  | Slc1a4        | 0.995 |
| Clk2          | 0.004 | 0.996 | 3.970  | 4.966  | 4.149  | 3.938  | 3.823  | 4.950  | 4.982  | Ntn3          | 0.993 |
| Fam3c         | 0.001 | 0.995 | 4.176  | 5.171  | 4.133  | 4.293  | 4.100  | 5.124  | 5.217  | Snx24         | 0.993 |
| Map3k14       | 0.002 | 0.995 | 1.524  | 2.518  | 1.485  | 1.588  | 1.498  | 2.623  | 2.414  | Fam3c         | 0.991 |
| Fmn12         | 0.001 | 0.994 | 4.777  | 5.772  | 4.695  | 4.861  | 4.776  | 5.747  | 5.796  | Fmn12         | 0.990 |
| Iffo2         | 0.008 | 0.994 | 0.820  | 1.814  | 0.974  | 0.578  | 0.908  | 1.850  | 1.779  | Rps10-ps4     | 0.986 |
| Retreg1       | 0.006 | 0.994 | 4.276  | 5.269  | 4.223  | 4.339  | 4.265  | 5.447  | 5.092  | Clk2          | 0.985 |
| Gm48677       | 0.009 | 0.992 | 0.779  | 1.771  | 0.735  | 0.730  | 0.870  | 1.564  | 1.978  | Gm43759       | 0.984 |
| Map4k4        | 0.002 | 0.990 | 3.919  | 4.909  | 3.803  | 4.059  | 3.893  | 4.867  | 4.951  | 5730420D15Rik | 0.982 |
| Ap5b1         | 0.002 | 0.989 | 2.519  | 3.508  | 2.516  | 2.388  | 2.652  | 3.473  | 3.542  | Map4k4        | 0.982 |
| Rps10-ps4     | 0.001 | 0.989 | -0.175 | 0.814  | -0.115 | -0.246 | -0.164 | 0.883  | 0.745  | 2900076A07Rik | 0.980 |
| 5730420D15Rik | 0.001 | 0.988 | 3.330  | 4.318  | 3.250  | 3.397  | 3.345  | 4.272  | 4.365  | Ap5b1         | 0.980 |
| Gm12404       | 0.005 | 0.988 | 2.640  | 3.628  | 2.737  | 2.440  | 2.744  | 3.577  | 3.679  | Rpl9-ps6      | 0.980 |
| Rpl9-ps6      | 0.007 | 0.986 | 0.186  | 1.173  | 0.254  | 0.006  | 0.299  | 1.289  | 1.056  | Iffo2         | 0.979 |
| Gk5           | 0.003 | 0.984 | 1.103  | 2.087  | 1.111  | 0.977  | 1.222  | 2.013  | 2.161  | Hcn3          | 0.976 |
| Tnfsf12       | 0.010 | 0.983 | 3.508  | 4.491  | 3.501  | 3.722  | 3.301  | 4.412  | 4.571  | Gk5           | 0.975 |
| 2900076A07Rik | 0.001 | 0.983 | 3.558  | 4.541  | 3.601  | 3.503  | 3.570  | 4.448  | 4.635  | Gm12404       | 0.975 |
| Jun           | 0.003 | 0.983 | 9.689  | 10.672 | 9.751  | 9.529  | 9.788  | 10.647 | 10.697 | Rreb1         | 0.973 |
| Gm26558       | 0.007 | 0.982 | 0.288  | 1.270  | 0.442  | 0.329  | 0.093  | 1.346  | 1.194  | Dennd3        | 0.973 |
| Trmt13        | 0.000 | 0.980 | 1.467  | 2.447  | 1.474  | 1.393  | 1.534  | 2.419  | 2.474  | Cdr2l         | 0.972 |
| Dennd3        | 0.000 | 0.979 | 3.073  | 4.053  | 3.112  | 3.051  | 3.058  | 4.001  | 4.105  | B3gnt2        | 0.971 |
| Lpin2         | 0.001 | 0.979 | 1.699  | 2.679  | 1.700  | 1.606  | 1.792  | 2.693  | 2.664  | Trmt13        | 0.971 |
| Cdr2l         | 0.002 | 0.979 | 2.106  | 3.085  | 2.203  | 2.039  | 2.078  | 3.000  | 3.170  | Jun           | 0.970 |
| B3gnt2        | 0.001 | 0.979 | -0.088 | 0.891  | -0.073 | -0.162 | -0.028 | 0.954  | 0.828  | Marveld3      | 0.970 |
| Marveld3      | 0.000 | 0.978 | 4.626  | 5.604  | 4.616  | 4.681  | 4.582  | 5.573  | 5.636  | Ifngr1        | 0.970 |
| Hcn3          | 0.002 | 0.978 | 3.131  | 4.109  | 3.127  | 3.179  | 3.087  | 3.994  | 4.224  | Pan2          | 0.969 |
| Tbc1d16       | 0.007 | 0.978 | 5.367  | 6.345  | 5.247  | 5.600  | 5.255  | 6.327  | 6.364  | Lpin2         | 0.969 |
| Ifngr1        | 0.000 | 0.978 | 3.538  | 4.516  | 3.564  | 3.522  | 3.528  | 4.496  | 4.536  | Cib1          | 0.969 |
| Cib1          | 0.000 | 0.977 | 4.638  | 5.616  | 4.665  | 4.593  | 4.658  | 5.656  | 5.575  | Supt20        | 0.968 |
| Retsat        | 0.003 | 0.977 | 2.593  | 3.569  | 2.490  | 2.753  | 2.535  | 3.524  | 3.614  | Gm26558       | 0.968 |
| Nedd4l        | 0.005 | 0.977 | 2.081  | 3.057  | 1.993  | 2.245  | 2.005  | 2.958  | 3.156  | Usp35         | 0.967 |
| Cxadr         | 0.000 | 0.977 | 2.982  | 3.959  | 2.934  | 3.011  | 3.001  | 3.940  | 3.977  | Cxadr         | 0.967 |
| Pan2          | 0.001 | 0.977 | 3.605  | 4.582  | 3.666  | 3.563  | 3.586  | 4.507  | 4.656  | Tnfsf12       | 0.966 |
| Taf4          | 0.001 | 0.976 | 3.491  | 4.468  | 3.418  | 3.597  | 3.459  | 4.504  | 4.431  | Nedd4l        | 0.966 |
| Usp35         | 0.000 | 0.976 | 5.151  | 6.127  | 5.214  | 5.099  | 5.140  | 6.176  | 6.078  | Taf4          | 0.966 |
| Gm13061       | 0.008 | 0.975 | -0.320 | 0.655  | -0.226 | -0.553 | -0.181 | 0.657  | 0.653  | Gm16090       | 0.965 |
| Obsl1         | 0.000 | 0.975 | 3.199  | 4.174  | 3.268  | 3.183  | 3.145  | 4.204  | 4.143  | Obsl1         | 0.965 |
| Rreb1         | 0.005 | 0.974 | 3.082  | 4.056  | 3.024  | 3.176  | 3.047  | 3.906  | 4.207  | Retsat        | 0.962 |
| Gm16090       | 0.004 | 0.973 | 2.075  | 3.049  | 2.201  | 2.011  | 2.014  | 2.938  | 3.159  | Tspan6        | 0.962 |



|               |       |       |        |        |        |        |        |        |        |               |       |
|---------------|-------|-------|--------|--------|--------|--------|--------|--------|--------|---------------|-------|
| Prxl2a        | 0.005 | 0.972 | 4.220  | 5.192  | 4.207  | 4.355  | 4.099  | 5.083  | 5.302  | Prxl2a        | 0.962 |
| Vmp1          | 0.000 | 0.972 | 5.570  | 6.542  | 5.568  | 5.512  | 5.629  | 6.508  | 6.575  | Gan           | 0.962 |
| Tspan6        | 0.009 | 0.971 | 0.989  | 1.960  | 1.028  | 0.814  | 1.124  | 1.817  | 2.103  | Baiap2l1      | 0.961 |
| 2810414N06Rik | 0.007 | 0.970 | 1.343  | 2.313  | 1.151  | 1.361  | 1.517  | 2.233  | 2.393  | Vmp1          | 0.961 |
| Cmtr2         | 0.004 | 0.970 | 2.101  | 3.072  | 1.975  | 2.211  | 2.118  | 3.179  | 2.964  | Cmtr2         | 0.960 |
| Sipa1l1       | 0.002 | 0.970 | 3.280  | 4.250  | 3.208  | 3.364  | 3.269  | 4.165  | 4.335  | Sipa1l1       | 0.960 |
| Pwwp2a        | 0.001 | 0.970 | 2.991  | 3.961  | 3.053  | 2.895  | 3.026  | 3.955  | 3.966  | Tbc1d16       | 0.957 |
| Baiap2l1      | 0.001 | 0.969 | 4.483  | 5.452  | 4.517  | 4.506  | 4.426  | 5.543  | 5.362  | Pwwp2a        | 0.956 |
| Supt20        | 0.004 | 0.969 | 3.960  | 4.929  | 3.914  | 3.995  | 3.969  | 4.777  | 5.082  | Dusp18        | 0.955 |
| Gpt2          | 0.008 | 0.969 | 2.857  | 3.826  | 2.974  | 2.629  | 2.967  | 3.765  | 3.886  | Tuba1c        | 0.955 |
| Plekhf2       | 0.008 | 0.969 | 2.933  | 3.901  | 2.805  | 3.156  | 2.837  | 3.970  | 3.833  | Gm13061       | 0.953 |
| Tuba1c        | 0.001 | 0.969 | 3.797  | 4.766  | 3.777  | 3.722  | 3.893  | 4.778  | 4.753  | 2810414N06Rik | 0.952 |
| Gan           | 0.010 | 0.966 | 1.334  | 2.300  | 1.351  | 1.462  | 1.189  | 2.126  | 2.474  | Ankrd24       | 0.949 |
| Rara          | 0.008 | 0.966 | 1.734  | 2.700  | 1.945  | 1.689  | 1.567  | 2.645  | 2.755  | Asxl2         | 0.949 |
| Dusp18        | 0.001 | 0.966 | 4.890  | 5.855  | 4.832  | 4.900  | 4.937  | 5.940  | 5.770  | Zbtb39        | 0.949 |
| Ubr2          | 0.001 | 0.964 | 4.900  | 5.864  | 4.795  | 5.001  | 4.904  | 5.862  | 5.865  | Fam234a       | 0.948 |
| Bri3bp        | 0.001 | 0.962 | 1.719  | 2.681  | 1.793  | 1.654  | 1.712  | 2.623  | 2.739  | Bri3bp        | 0.948 |
| Srsf5         | 0.003 | 0.961 | 7.184  | 8.145  | 7.287  | 7.048  | 7.217  | 8.065  | 8.225  | Gpt2          | 0.947 |
| Ankrd24       | 0.002 | 0.960 | 4.699  | 5.660  | 4.787  | 4.625  | 4.686  | 5.553  | 5.766  | Plekhf2       | 0.947 |
| Spry2         | 0.008 | 0.960 | 1.582  | 2.542  | 1.400  | 1.686  | 1.659  | 2.411  | 2.672  | Fam227a       | 0.947 |
| Fam234a       | 0.003 | 0.960 | 5.406  | 6.365  | 5.383  | 5.508  | 5.326  | 6.252  | 6.479  | Ubr2          | 0.947 |
| Fam227a       | 0.001 | 0.959 | 1.288  | 2.248  | 1.329  | 1.219  | 1.318  | 2.154  | 2.341  | Spry2         | 0.946 |
| Ankrd52       | 0.004 | 0.957 | 3.801  | 4.758  | 3.745  | 3.930  | 3.727  | 4.647  | 4.869  | Srsf5         | 0.945 |
| Zbtb39        | 0.004 | 0.957 | 2.757  | 3.715  | 2.748  | 2.844  | 2.681  | 3.577  | 3.852  | Ankrd52       | 0.944 |
| Gpx3          | 0.001 | 0.957 | 10.580 | 11.536 | 10.593 | 10.495 | 10.651 | 11.511 | 11.562 | Rara          | 0.943 |
| Dvl3          | 0.000 | 0.957 | 4.695  | 5.652  | 4.692  | 4.708  | 4.685  | 5.654  | 5.651  | Dvl3          | 0.941 |
| Asxl2         | 0.004 | 0.956 | 3.471  | 4.427  | 3.409  | 3.469  | 3.534  | 4.280  | 4.573  | Gpx3          | 0.940 |
| F420014N23Rik | 0.007 | 0.956 | 0.708  | 1.664  | 0.700  | 0.886  | 0.540  | 1.589  | 1.739  | Cramp1        | 0.939 |
| Cramp1        | 0.001 | 0.955 | 3.538  | 4.493  | 3.508  | 3.606  | 3.501  | 4.438  | 4.549  | Cdk8          | 0.938 |
| Lrig1         | 0.009 | 0.954 | 2.701  | 3.656  | 2.742  | 2.867  | 2.495  | 3.556  | 3.755  | Myo10         | 0.936 |
| Cdk8          | 0.000 | 0.954 | 4.659  | 5.613  | 4.642  | 4.675  | 4.659  | 5.591  | 5.635  | Trim56        | 0.936 |
| Dsp           | 0.001 | 0.954 | 5.139  | 6.093  | 5.096  | 5.231  | 5.089  | 6.097  | 6.089  | Dsp           | 0.935 |
| Trim56        | 0.000 | 0.953 | 3.875  | 4.829  | 3.864  | 3.906  | 3.857  | 4.818  | 4.840  | Bcl7a         | 0.935 |
| Nrip3         | 0.002 | 0.952 | 1.269  | 2.221  | 1.373  | 1.150  | 1.283  | 2.172  | 2.270  | Nudt13        | 0.935 |
| Nudt13        | 0.003 | 0.952 | 2.709  | 3.661  | 2.807  | 2.584  | 2.735  | 3.571  | 3.751  | Ndst1         | 0.934 |
| Rhbdl3        | 0.002 | 0.952 | 2.246  | 3.198  | 2.169  | 2.371  | 2.198  | 3.138  | 3.258  | Best3         | 0.934 |
| Best3         | 0.000 | 0.952 | 4.308  | 5.260  | 4.290  | 4.278  | 4.356  | 5.230  | 5.289  | F420014N23Rik | 0.933 |
| Usp18         | 0.001 | 0.951 | 4.982  | 5.934  | 4.903  | 5.099  | 4.946  | 5.931  | 5.936  | Rhbdl3        | 0.933 |
| Myo10         | 0.002 | 0.951 | 3.836  | 4.787  | 3.788  | 3.903  | 3.818  | 4.887  | 4.688  | Nrip3         | 0.932 |
| Usp28         | 0.000 | 0.950 | 1.716  | 2.666  | 1.697  | 1.794  | 1.658  | 2.660  | 2.672  | Lrig1         | 0.931 |
| Cux2          | 0.000 | 0.949 | 4.305  | 5.253  | 4.324  | 4.308  | 4.282  | 5.233  | 5.273  | Cux2          | 0.930 |
| Kazn          | 0.000 | 0.948 | 1.902  | 2.850  | 1.972  | 1.841  | 1.892  | 2.890  | 2.810  | Usp18         | 0.930 |
| Ybx3          | 0.000 | 0.947 | 5.072  | 6.019  | 5.029  | 5.122  | 5.066  | 6.052  | 5.986  | Usp28         | 0.930 |
| Cdyl          | 0.002 | 0.946 | 2.019  | 2.965  | 1.955  | 2.094  | 2.008  | 2.867  | 3.063  | Cdyl          | 0.930 |
| Barhl1        | 0.001 | 0.945 | 3.087  | 4.031  | 3.056  | 3.195  | 3.009  | 4.058  | 4.004  | Kazn          | 0.929 |
| Gm15751       | 0.007 | 0.945 | 1.681  | 2.626  | 1.706  | 1.514  | 1.823  | 2.520  | 2.732  | Ybx3          | 0.928 |
| Btbd7         | 0.003 | 0.944 | 2.440  | 3.384  | 2.342  | 2.610  | 2.368  | 3.376  | 3.393  | Gm42664       | 0.928 |
| Gcnt2         | 0.004 | 0.944 | 3.857  | 4.801  | 3.761  | 3.854  | 3.957  | 4.687  | 4.916  | Gcnt2         | 0.928 |
| Bcl7a         | 0.009 | 0.944 | 2.792  | 3.736  | 2.714  | 2.914  | 2.748  | 3.553  | 3.918  | Sall1         | 0.924 |
| Gm42664       | 0.005 | 0.943 | 2.388  | 3.332  | 2.264  | 2.474  | 2.427  | 3.195  | 3.468  | Gm15751       | 0.922 |
| Rilpl2        | 0.000 | 0.943 | 3.489  | 4.432  | 3.536  | 3.474  | 3.457  | 4.429  | 4.434  | Barhl1        | 0.922 |
| Fryl          | 0.000 | 0.942 | 4.071  | 5.013  | 4.071  | 4.057  | 4.084  | 5.006  | 5.020  | Rilpl2        | 0.922 |
| Slc16a13      | 0.002 | 0.942 | 2.499  | 3.441  | 2.477  | 2.610  | 2.409  | 3.358  | 3.523  | Fryl          | 0.921 |
| Terf2         | 0.000 | 0.942 | 4.610  | 5.551  | 4.637  | 4.635  | 4.556  | 5.510  | 5.592  | Slc16a13      | 0.921 |
| Gadd45g       | 0.005 | 0.940 | 8.500  | 9.440  | 8.594  | 8.317  | 8.588  | 9.386  | 9.494  | Terf2         | 0.921 |
| Hmgn3         | 0.000 | 0.940 | 5.581  | 6.521  | 5.596  | 5.544  | 5.603  | 6.463  | 6.579  | Hmgn3         | 0.920 |
| Dnase1l1      | 0.004 | 0.940 | 1.818  | 2.757  | 1.821  | 1.975  | 1.657  | 2.740  | 2.774  | Pou6f1        | 0.920 |
| Rhpn1         | 0.000 | 0.939 | 1.690  | 2.629  | 1.687  | 1.694  | 1.688  | 2.636  | 2.623  | Mob1b         | 0.919 |
| Nr6a1         | 0.006 | 0.939 | 1.430  | 2.369  | 1.286  | 1.426  | 1.578  | 2.472  | 2.267  | Rhpn1         | 0.918 |
| Lrp1          | 0.001 | 0.939 | 0.001  | 0.940  | -0.042 | -0.046 | 0.092  | 0.916  | 0.965  | Btbd7         | 0.918 |
| Marchf9       | 0.000 | 0.939 | 4.921  | 5.859  | 4.913  | 4.957  | 4.892  | 5.891  | 5.828  | Marchf9       | 0.917 |
| Mob1b         | 0.001 | 0.938 | 3.267  | 4.205  | 3.217  | 3.248  | 3.334  | 4.114  | 4.296  | Nr6a1         | 0.916 |
| Ndst1         | 0.010 | 0.938 | 5.183  | 6.121  | 5.154  | 5.249  | 5.146  | 5.916  | 6.326  | Lrp1          | 0.916 |
| Ppp1r12b      | 0.002 | 0.938 | 2.608  | 3.546  | 2.514  | 2.592  | 2.717  | 3.466  | 3.625  | Ppp1r12b      | 0.915 |
| Tmem181a      | 0.001 | 0.936 | 2.865  | 3.802  | 2.924  | 2.816  | 2.857  | 3.745  | 3.858  | Tmem181a      | 0.914 |
| Sall1         | 0.008 | 0.935 | 3.054  | 3.989  | 3.132  | 2.948  | 3.083  | 4.168  | 3.811  | Chic2         | 0.913 |

|               |       |       |        |        |        |        |        |        |        |               |       |
|---------------|-------|-------|--------|--------|--------|--------|--------|--------|--------|---------------|-------|
| Tmem181b-ps   | 0.000 | 0.934 | 4.979  | 5.913  | 5.007  | 4.951  | 4.978  | 5.958  | 5.868  | Gadd45g       | 0.912 |
| Fam107a       | 0.002 | 0.933 | 2.136  | 3.069  | 2.007  | 2.171  | 2.230  | 3.071  | 3.067  | Tmem181b-ps   | 0.911 |
| Pou6f1        | 0.005 | 0.932 | 3.057  | 3.989  | 3.116  | 3.034  | 3.020  | 3.826  | 4.152  | Dnase1l1      | 0.911 |
| Zfp628        | 0.006 | 0.932 | 3.101  | 4.033  | 3.281  | 2.992  | 3.031  | 3.946  | 4.119  | Vamp1         | 0.910 |
| Vamp1         | 0.001 | 0.931 | 2.432  | 3.363  | 2.473  | 2.393  | 2.431  | 3.273  | 3.453  | Cand2         | 0.910 |
| Chic2         | 0.009 | 0.931 | 2.018  | 2.949  | 2.048  | 1.878  | 2.129  | 2.789  | 3.110  | Sh3rf1        | 0.909 |
| Fcho2         | 0.000 | 0.931 | 3.334  | 4.264  | 3.315  | 3.381  | 3.305  | 4.222  | 4.306  | Pkp3          | 0.908 |
| 4633401B06Rik | 0.010 | 0.929 | 0.533  | 1.463  | 0.714  | 0.299  | 0.586  | 1.484  | 1.441  | Cln3          | 0.906 |
| Pkp3          | 0.003 | 0.929 | 2.623  | 3.552  | 2.535  | 2.693  | 2.641  | 3.442  | 3.662  | Fcho2         | 0.906 |
| Sh3rf1        | 0.003 | 0.929 | 1.399  | 2.328  | 1.449  | 1.325  | 1.423  | 2.204  | 2.452  | Fam107a       | 0.905 |
| Abcc10        | 0.001 | 0.929 | 3.341  | 4.270  | 3.405  | 3.243  | 3.376  | 4.202  | 4.338  | Abcc10        | 0.903 |
| Hs6st1        | 0.004 | 0.928 | 4.419  | 5.347  | 4.293  | 4.584  | 4.381  | 5.387  | 5.308  | Zfp628        | 0.903 |
| Cln3          | 0.002 | 0.927 | 3.099  | 4.026  | 3.107  | 3.152  | 3.038  | 3.911  | 4.141  | Usp54         | 0.903 |
| Adra2a        | 0.001 | 0.927 | 6.708  | 7.635  | 6.690  | 6.759  | 6.676  | 7.561  | 7.709  | Adra2a        | 0.903 |
| Map4k3        | 0.007 | 0.926 | 2.960  | 3.886  | 2.784  | 3.112  | 2.983  | 3.805  | 3.967  | Tbc1d12       | 0.902 |
| Tbc1d12       | 0.001 | 0.926 | 2.463  | 3.389  | 2.443  | 2.488  | 2.459  | 3.310  | 3.467  | Tcf24         | 0.901 |
| Cfap157       | 0.007 | 0.925 | 0.549  | 1.475  | 0.758  | 0.463  | 0.427  | 1.458  | 1.491  | Unc5a         | 0.901 |
| Cand2         | 0.004 | 0.925 | 3.573  | 4.498  | 3.578  | 3.574  | 3.567  | 4.343  | 4.653  | Acadm         | 0.899 |
| Acadm         | 0.001 | 0.924 | 3.527  | 4.451  | 3.493  | 3.593  | 3.495  | 4.385  | 4.518  | Pex10         | 0.898 |
| Denn2b        | 0.001 | 0.924 | 4.887  | 5.811  | 4.834  | 4.965  | 4.861  | 5.759  | 5.863  | Scg2          | 0.898 |
| Cd63          | 0.001 | 0.924 | 7.285  | 8.209  | 7.232  | 7.391  | 7.233  | 8.225  | 8.193  | Denn2b        | 0.897 |
| Usp54         | 0.002 | 0.924 | 2.277  | 3.201  | 2.279  | 2.286  | 2.267  | 3.083  | 3.318  | Zfp579        | 0.897 |
| Scg2          | 0.003 | 0.923 | 11.930 | 12.853 | 11.829 | 12.029 | 11.932 | 12.948 | 12.759 | Hs6st1        | 0.897 |
| Crebzf        | 0.001 | 0.923 | 4.935  | 5.858  | 5.008  | 4.929  | 4.867  | 5.831  | 5.885  | Crebzf        | 0.895 |
| Cdc5l         | 0.000 | 0.923 | 5.645  | 6.568  | 5.597  | 5.727  | 5.610  | 6.556  | 6.579  | Cd63          | 0.895 |
| Lpcat3        | 0.001 | 0.923 | 5.129  | 6.052  | 5.122  | 5.225  | 5.040  | 6.049  | 6.055  | Map4k3        | 0.895 |
| Tnfrsf11a     | 0.004 | 0.922 | 2.540  | 3.462  | 2.521  | 2.396  | 2.702  | 3.478  | 3.446  | Cdc5l         | 0.895 |
| Zfp579        | 0.003 | 0.922 | 3.058  | 3.979  | 3.158  | 3.018  | 2.996  | 3.872  | 4.087  | Ddx58         | 0.894 |
| Il4ra         | 0.004 | 0.921 | 1.562  | 2.483  | 1.456  | 1.725  | 1.505  | 2.540  | 2.426  | Kdm1b         | 0.894 |
| Tcf24         | 0.006 | 0.921 | 4.459  | 5.379  | 4.374  | 4.542  | 4.460  | 5.530  | 5.229  | Lpcat3        | 0.893 |
| Micall1       | 0.003 | 0.920 | 2.056  | 2.976  | 2.141  | 2.086  | 1.941  | 2.879  | 3.073  | Micall1       | 0.893 |
| Leprot        | 0.000 | 0.919 | 5.226  | 6.145  | 5.235  | 5.294  | 5.149  | 6.138  | 6.152  | Tcf3          | 0.892 |
| B4galt3       | 0.000 | 0.919 | 4.175  | 5.094  | 4.146  | 4.229  | 4.150  | 5.046  | 5.142  | B4galt3       | 0.891 |
| Tob2          | 0.008 | 0.919 | 3.764  | 4.683  | 3.674  | 3.984  | 3.634  | 4.638  | 4.728  | 4633401B06Rik | 0.891 |
| Unc5a         | 0.010 | 0.919 | 3.926  | 4.845  | 3.977  | 4.005  | 3.797  | 4.670  | 5.020  | Leprot        | 0.889 |
| Maml1         | 0.002 | 0.918 | 3.087  | 4.005  | 3.044  | 3.205  | 3.011  | 3.937  | 4.072  | Cfap157       | 0.889 |
| Gca           | 0.004 | 0.918 | 4.155  | 5.073  | 4.137  | 4.027  | 4.300  | 4.999  | 5.146  | Il4ra         | 0.889 |
| Ddx58         | 0.003 | 0.918 | 2.757  | 3.676  | 2.748  | 2.830  | 2.694  | 3.789  | 3.562  | Maml1         | 0.889 |
| Kdm1b         | 0.005 | 0.918 | 2.745  | 3.663  | 2.794  | 2.816  | 2.626  | 3.534  | 3.792  | Birc3         | 0.888 |
| Trim25        | 0.006 | 0.918 | 5.198  | 6.116  | 5.170  | 5.370  | 5.053  | 6.047  | 6.185  | Anks1         | 0.888 |
| Slc9a3r2      | 0.010 | 0.918 | 2.969  | 3.887  | 2.913  | 2.804  | 3.191  | 3.825  | 3.950  | Tnfrsf11a     | 0.888 |
| Chkb          | 0.004 | 0.918 | 1.063  | 1.981  | 1.236  | 0.924  | 1.029  | 1.980  | 1.982  | Gca           | 0.886 |
| Birc3         | 0.001 | 0.918 | 2.104  | 3.021  | 2.009  | 2.186  | 2.116  | 2.962  | 3.081  | S100a11       | 0.886 |
| Tcf3          | 0.001 | 0.918 | 4.109  | 5.027  | 4.119  | 4.147  | 4.062  | 4.941  | 5.113  | Lrrc28        | 0.886 |
| Gm17259       | 0.009 | 0.917 | -0.058 | 0.859  | -0.255 | 0.056  | 0.024  | 0.750  | 0.968  | Sigirr        | 0.885 |
| Pex10         | 0.005 | 0.917 | 3.224  | 4.141  | 3.246  | 3.161  | 3.266  | 4.294  | 3.988  | Gm17259       | 0.885 |
| S100a11       | 0.000 | 0.915 | 6.478  | 7.394  | 6.501  | 6.475  | 6.459  | 7.379  | 7.409  | Plekha8       | 0.884 |
| Prickle3      | 0.007 | 0.915 | 0.891  | 1.806  | 1.019  | 0.956  | 0.699  | 1.743  | 1.870  | Trim25        | 0.884 |
| Plekha8       | 0.002 | 0.915 | 2.897  | 3.812  | 2.818  | 3.019  | 2.853  | 3.871  | 3.753  | Cnot6l        | 0.884 |
| Lrp6          | 0.005 | 0.915 | 3.697  | 4.611  | 3.546  | 3.857  | 3.687  | 4.665  | 4.557  | Crebbp        | 0.883 |
| Sigirr        | 0.001 | 0.914 | 3.611  | 4.525  | 3.614  | 3.550  | 3.669  | 4.588  | 4.463  | Rasgrp1       | 0.882 |
| Phf2          | 0.003 | 0.914 | 5.021  | 5.935  | 4.960  | 5.171  | 4.931  | 5.886  | 5.983  | Chkb          | 0.882 |
| Sipa1l3       | 0.005 | 0.914 | 4.403  | 5.316  | 4.319  | 4.597  | 4.292  | 5.329  | 5.304  | Phf2          | 0.880 |
| Anks1         | 0.003 | 0.913 | 4.320  | 5.233  | 4.315  | 4.396  | 4.249  | 5.351  | 5.115  | Tob2          | 0.880 |
| Crebbp        | 0.000 | 0.912 | 3.289  | 4.201  | 3.257  | 3.313  | 3.297  | 4.152  | 4.250  | Zhx2          | 0.880 |
| Zhx2          | 0.000 | 0.910 | 3.459  | 4.369  | 3.406  | 3.470  | 3.500  | 4.424  | 4.314  | Lrp6          | 0.879 |
| Lrrc28        | 0.003 | 0.909 | 1.026  | 1.936  | 1.049  | 1.035  | 0.995  | 1.802  | 2.069  | Prickle3      | 0.879 |
| Fgf9          | 0.003 | 0.909 | 1.514  | 2.423  | 1.465  | 1.443  | 1.636  | 2.348  | 2.499  | Slc9a3r2      | 0.879 |
| Rasgrp1       | 0.009 | 0.909 | 3.967  | 4.875  | 3.885  | 3.891  | 4.125  | 4.723  | 5.028  | Rabgap1l      | 0.878 |
| Pparg         | 0.001 | 0.908 | 2.129  | 3.038  | 2.176  | 2.022  | 2.190  | 3.081  | 2.994  | Fgf9          | 0.877 |
| Fam185a       | 0.000 | 0.907 | 3.640  | 4.547  | 3.668  | 3.611  | 3.642  | 4.563  | 4.532  | Pparg         | 0.875 |
| Dapk1         | 0.006 | 0.906 | 4.077  | 4.984  | 4.040  | 4.260  | 3.932  | 5.010  | 4.957  | Sipa1l3       | 0.875 |
| Rabgap1l      | 0.002 | 0.906 | 2.663  | 3.569  | 2.706  | 2.677  | 2.607  | 3.471  | 3.668  | Fam185a       | 0.875 |
| Dlgap4        | 0.004 | 0.906 | 3.654  | 4.560  | 3.701  | 3.744  | 3.517  | 4.651  | 4.469  | Dlgap4        | 0.873 |
| Slc29a2       | 0.006 | 0.906 | 0.253  | 1.159  | 0.101  | 0.217  | 0.442  | 1.166  | 1.152  | 2310014F06Rik | 0.873 |
| Ttc12         | 0.005 | 0.905 | 0.858  | 1.764  | 0.887  | 1.000  | 0.688  | 1.737  | 1.790  | Gm50462       | 0.873 |

|               |       |       |        |       |        |        |        |       |       |               |       |
|---------------|-------|-------|--------|-------|--------|--------|--------|-------|-------|---------------|-------|
| Cnot6l        | 0.006 | 0.905 | 5.095  | 6.000 | 5.037  | 5.170  | 5.076  | 5.835 | 6.164 | Ubap2         | 0.872 |
| Gm50462       | 0.007 | 0.905 | -0.150 | 0.755 | -0.312 | -0.062 | -0.077 | 0.868 | 0.641 | Tmeff1        | 0.870 |
| Gm12940       | 0.002 | 0.905 | 3.152  | 4.057 | 3.047  | 3.288  | 3.122  | 4.039 | 4.075 | Gm12940       | 0.868 |
| Ubap2         | 0.000 | 0.905 | 4.918  | 5.823 | 4.924  | 4.963  | 4.868  | 5.823 | 5.823 | Zfyve26       | 0.868 |
| Zfyve26       | 0.001 | 0.903 | 2.066  | 2.970 | 1.985  | 2.168  | 2.046  | 2.955 | 2.984 | Dapk1         | 0.866 |
| Gstp1         | 0.006 | 0.902 | 4.158  | 5.060 | 4.329  | 4.072  | 4.074  | 5.155 | 4.966 | Gstp1         | 0.866 |
| Gm47483       | 0.009 | 0.900 | 2.466  | 3.366 | 2.544  | 2.605  | 2.247  | 3.299 | 3.433 | Ttc12         | 0.866 |
| Yes1          | 0.001 | 0.900 | 2.521  | 3.421 | 2.453  | 2.603  | 2.508  | 3.391 | 3.452 | Spata2        | 0.865 |
| Spata2        | 0.000 | 0.900 | 2.198  | 3.098 | 2.184  | 2.261  | 2.150  | 3.129 | 3.068 | Fbxw24        | 0.865 |
| Fbxw24        | 0.004 | 0.900 | 5.521  | 6.421 | 5.430  | 5.651  | 5.481  | 6.334 | 6.507 | Yes1          | 0.865 |
| Dbpht2        | 0.009 | 0.898 | 3.044  | 3.942 | 3.191  | 2.857  | 3.083  | 3.838 | 4.046 | Ccdc15        | 0.865 |
| Z310014F06Rik | 0.008 | 0.898 | 1.836  | 2.734 | 1.720  | 1.900  | 1.887  | 2.570 | 2.898 | Kmt2b         | 0.865 |
| Tmeff1        | 0.007 | 0.898 | 0.255  | 1.153 | 0.370  | 0.244  | 0.151  | 1.302 | 1.004 | Slc29a2       | 0.864 |
| Dact1         | 0.001 | 0.898 | 2.348  | 3.246 | 2.398  | 2.264  | 2.383  | 3.229 | 3.263 | Pisd-ps1      | 0.863 |
| Kmt2b         | 0.001 | 0.898 | 4.032  | 4.929 | 4.041  | 4.055  | 3.999  | 4.860 | 4.998 | Mef2d         | 0.863 |
| Zbtb7b        | 0.001 | 0.897 | 4.684  | 5.581 | 4.762  | 4.683  | 4.608  | 5.577 | 5.585 | Card19        | 0.862 |
| Tor2a         | 0.001 | 0.896 | 4.509  | 5.405 | 4.456  | 4.495  | 4.575  | 5.337 | 5.472 | Tor2a         | 0.862 |
| Cacul1        | 0.001 | 0.895 | 4.092  | 4.987 | 4.056  | 4.178  | 4.042  | 4.927 | 5.047 | Dact1         | 0.862 |
| Card19        | 0.001 | 0.895 | 3.754  | 4.649 | 3.712  | 3.737  | 3.812  | 4.739 | 4.558 | Dbpht2        | 0.860 |
| H2bc9         | 0.000 | 0.894 | 2.196  | 3.090 | 2.169  | 2.175  | 2.244  | 3.092 | 3.089 | Zbtb7b        | 0.860 |
| Celsr3        | 0.000 | 0.894 | 4.650  | 5.544 | 4.679  | 4.645  | 4.625  | 5.479 | 5.609 | Celsr3        | 0.860 |
| Mef2d         | 0.001 | 0.894 | 5.549  | 6.443 | 5.558  | 5.573  | 5.515  | 6.341 | 6.545 | Cacul1        | 0.860 |
| Dcp1b         | 0.003 | 0.893 | 2.610  | 3.503 | 2.733  | 2.557  | 2.539  | 3.420 | 3.586 | Fbxl18        | 0.859 |
| Fpgs          | 0.009 | 0.893 | 3.816  | 4.709 | 3.936  | 3.608  | 3.904  | 4.781 | 4.638 | H2bc9         | 0.858 |
| Ccdc15        | 0.007 | 0.893 | -0.086 | 0.806 | -0.160 | 0.018  | -0.118 | 0.961 | 0.652 | Gm47483       | 0.858 |
| Csrp1         | 0.001 | 0.892 | 5.951  | 6.843 | 6.002  | 5.843  | 6.008  | 6.823 | 6.864 | Dcp1b         | 0.857 |
| Tpt1-ps3      | 0.000 | 0.892 | 3.910  | 4.803 | 3.947  | 3.854  | 3.929  | 4.757 | 4.848 | Ehbp1         | 0.857 |
| Fnbp4         | 0.001 | 0.892 | 4.110  | 5.002 | 4.209  | 4.016  | 4.104  | 4.960 | 5.045 | Tpt1-ps3      | 0.856 |
| Hsbp1         | 0.008 | 0.892 | 7.904  | 8.795 | 7.828  | 8.083  | 7.801  | 8.902 | 8.689 | Adgrg1        | 0.856 |
| Fbxl18        | 0.003 | 0.892 | 1.971  | 2.862 | 2.050  | 1.941  | 1.921  | 2.749 | 2.976 | Mrxip         | 0.856 |
| Adgrg1        | 0.001 | 0.891 | 6.998  | 7.888 | 6.947  | 7.065  | 6.981  | 7.803 | 7.974 | Nav2          | 0.855 |
| Pisd-ps1      | 0.005 | 0.891 | 3.108  | 3.998 | 3.177  | 3.067  | 3.079  | 3.847 | 4.149 | Dnmt3a        | 0.855 |
| Arid4b        | 0.002 | 0.889 | 3.111  | 4.001 | 3.009  | 3.224  | 3.102  | 4.015 | 3.987 | Fnbp4         | 0.854 |
| Ehbp1         | 0.002 | 0.889 | 3.709  | 4.598 | 3.706  | 3.684  | 3.737  | 4.488 | 4.708 | Csrp1         | 0.854 |
| Trrap         | 0.001 | 0.888 | 3.924  | 4.812 | 3.897  | 3.983  | 3.891  | 4.749 | 4.875 | Hsbp1         | 0.853 |
| B930095G15Rik | 0.001 | 0.888 | 3.262  | 4.150 | 3.318  | 3.173  | 3.296  | 4.158 | 4.143 | Trrap         | 0.852 |
| Mrxip         | 0.002 | 0.888 | 4.396  | 5.284 | 4.365  | 4.398  | 4.424  | 5.172 | 5.395 | ENSMUSG00000  | 0.851 |
| Fbrs          | 0.002 | 0.888 | 4.973  | 5.861 | 4.956  | 5.104  | 4.858  | 5.860 | 5.862 | Rere          | 0.850 |
| Arhgef10l     | 0.001 | 0.888 | 1.481  | 2.368 | 1.562  | 1.406  | 1.474  | 2.333 | 2.404 | Blvrb         | 0.850 |
| Blvrb         | 0.001 | 0.887 | 1.249  | 2.136 | 1.316  | 1.230  | 1.201  | 2.076 | 2.197 | Fpgs          | 0.850 |
| Rere          | 0.001 | 0.887 | 6.158  | 7.045 | 6.135  | 6.217  | 6.123  | 6.988 | 7.103 | Tle2          | 0.849 |
| Dnmt3a        | 0.003 | 0.887 | 4.261  | 5.148 | 4.298  | 4.282  | 4.203  | 5.032 | 5.264 | B930095G15Rik | 0.849 |
| Mtmr7         | 0.000 | 0.887 | 5.885  | 6.772 | 5.872  | 5.870  | 5.914  | 6.779 | 6.765 | Arhgef10l     | 0.849 |
| Kdm3b         | 0.001 | 0.885 | 3.140  | 4.025 | 3.185  | 3.070  | 3.165  | 3.943 | 4.107 | Arid4b        | 0.849 |
| Nav2          | 0.003 | 0.885 | 3.592  | 4.477 | 3.577  | 3.583  | 3.615  | 4.340 | 4.613 | Kdm3b         | 0.849 |
| Lrrc18        | 0.001 | 0.885 | 2.201  | 3.086 | 2.120  | 2.263  | 2.219  | 3.077 | 3.094 | Mtmr7         | 0.849 |
| Tle2          | 0.003 | 0.885 | 3.719  | 4.604 | 3.770  | 3.764  | 3.624  | 4.497 | 4.711 | Nme6          | 0.848 |
| Pigm          | 0.001 | 0.884 | 2.768  | 3.652 | 2.822  | 2.668  | 2.812  | 3.693 | 3.611 | Fbrs          | 0.846 |
| ENSMUSG000000 | 0.005 | 0.883 | 6.545  | 7.428 | 6.632  | 6.512  | 6.490  | 7.289 | 7.567 | Snapc1        | 0.846 |
| Nme6          | 0.003 | 0.883 | 3.139  | 4.022 | 3.126  | 3.218  | 3.073  | 4.134 | 3.910 | Lrrc18        | 0.845 |
| Snapc1        | 0.001 | 0.882 | 2.186  | 3.068 | 2.232  | 2.162  | 2.163  | 2.987 | 3.149 | Ano8          | 0.844 |
| 9530085L11Rik | 0.005 | 0.882 | 1.348  | 2.230 | 1.467  | 1.168  | 1.408  | 2.219 | 2.242 | Pigm          | 0.844 |
| Naf1          | 0.000 | 0.882 | 2.321  | 3.203 | 2.330  | 2.343  | 2.290  | 3.185 | 3.221 | Zscan29       | 0.844 |
| Zscan29       | 0.002 | 0.882 | 3.417  | 4.299 | 3.355  | 3.498  | 3.399  | 4.222 | 4.375 | Angel1        | 0.843 |
| S100a1        | 0.001 | 0.882 | 6.462  | 7.344 | 6.472  | 6.525  | 6.391  | 7.302 | 7.386 | Naf1          | 0.843 |
| Efna5         | 0.002 | 0.881 | 3.409  | 4.290 | 3.354  | 3.535  | 3.339  | 4.304 | 4.276 | S100a1        | 0.842 |
| Ccs           | 0.000 | 0.880 | 4.450  | 5.329 | 4.420  | 4.433  | 4.496  | 5.272 | 5.387 | Ccs           | 0.841 |
| Ano8          | 0.003 | 0.880 | 3.542  | 4.422 | 3.594  | 3.565  | 3.468  | 4.308 | 4.536 | Ankrd28       | 0.841 |
| Fam135a       | 0.000 | 0.879 | 6.200  | 7.079 | 6.184  | 6.178  | 6.238  | 7.033 | 7.126 | Farp1         | 0.841 |
| Zfp46         | 0.002 | 0.879 | 2.759  | 3.638 | 2.670  | 2.756  | 2.852  | 3.585 | 3.691 | Phf21a        | 0.841 |
| Pex26         | 0.004 | 0.879 | 3.741  | 4.620 | 3.627  | 3.876  | 3.719  | 4.556 | 4.683 | Fam135a       | 0.840 |
| Farp1         | 0.001 | 0.879 | 4.520  | 5.399 | 4.459  | 4.579  | 4.522  | 5.317 | 5.481 | 6430503K07Rik | 0.839 |
| Phf21a        | 0.001 | 0.879 | 4.180  | 5.059 | 4.167  | 4.222  | 4.150  | 4.988 | 5.129 | Zfp46         | 0.838 |
| Kctd8         | 0.006 | 0.877 | 1.894  | 2.771 | 1.842  | 2.080  | 1.760  | 2.802 | 2.740 | Zfp595        | 0.838 |
| Gm12264       | 0.008 | 0.877 | 1.611  | 2.488 | 1.505  | 1.826  | 1.501  | 2.517 | 2.459 | Efna5         | 0.838 |
| Tes           | 0.000 | 0.877 | 4.805  | 5.681 | 4.778  | 4.842  | 4.795  | 5.678 | 5.685 | Erbin         | 0.837 |

|               |       |       |        |        |        |        |        |        |        |               |       |
|---------------|-------|-------|--------|--------|--------|--------|--------|--------|--------|---------------|-------|
| Zfp595        | 0.001 | 0.876 | 0.891  | 1.767  | 0.853  | 0.926  | 0.893  | 1.845  | 1.688  | Pex26         | 0.836 |
| Ccnh          | 0.001 | 0.876 | 4.559  | 5.435  | 4.538  | 4.496  | 4.644  | 5.402  | 5.468  | 9530085L11Rik | 0.836 |
| Ak2           | 0.002 | 0.875 | 5.180  | 6.056  | 5.261  | 5.104  | 5.176  | 6.133  | 5.978  | Tes           | 0.836 |
| Ankrd28       | 0.003 | 0.875 | 2.764  | 3.640  | 2.779  | 2.783  | 2.731  | 3.517  | 3.763  | Ak2           | 0.835 |
| Mmp24         | 0.001 | 0.874 | 2.225  | 3.100  | 2.196  | 2.299  | 2.181  | 3.046  | 3.153  | Grb7          | 0.834 |
| Med12         | 0.001 | 0.874 | 4.628  | 5.501  | 4.610  | 4.695  | 4.578  | 5.459  | 5.544  | Ccnh          | 0.834 |
| 6430503K07Rik | 0.009 | 0.874 | 5.508  | 6.381  | 5.506  | 5.623  | 5.394  | 6.228  | 6.535  | Mmp24         | 0.833 |
| Erbin         | 0.005 | 0.873 | 4.943  | 5.817  | 4.842  | 5.019  | 4.968  | 5.690  | 5.943  | Med12         | 0.832 |
| Angel1        | 0.009 | 0.872 | 3.681  | 4.553  | 3.607  | 3.753  | 3.682  | 4.371  | 4.735  | Ccnj          | 0.831 |
| Myo1b         | 0.006 | 0.872 | 2.398  | 3.270  | 2.379  | 2.535  | 2.280  | 3.165  | 3.375  | Myo1b         | 0.830 |
| Nbeal1        | 0.001 | 0.870 | 2.781  | 3.651  | 2.760  | 2.852  | 2.731  | 3.686  | 3.616  | Lats1         | 0.830 |
| Lats1         | 0.001 | 0.870 | 5.132  | 6.002  | 5.093  | 5.184  | 5.120  | 5.914  | 6.089  | Kctd8         | 0.829 |
| Steap2        | 0.004 | 0.869 | 2.739  | 3.607  | 2.703  | 2.872  | 2.640  | 3.537  | 3.678  | Nbeal1        | 0.827 |
| Phlpp2        | 0.008 | 0.868 | 2.853  | 3.721  | 2.860  | 3.016  | 2.682  | 3.652  | 3.790  | Gm12264       | 0.826 |
| Actb          | 0.005 | 0.867 | 9.574  | 10.441 | 9.604  | 9.434  | 9.684  | 10.361 | 10.521 | Sh3d19        | 0.825 |
| Cspp1         | 0.000 | 0.867 | 3.456  | 4.323  | 3.479  | 3.411  | 3.478  | 4.361  | 4.284  | Steap2        | 0.824 |
| Plagl2        | 0.006 | 0.866 | 2.661  | 3.528  | 2.620  | 2.821  | 2.543  | 3.454  | 3.602  | Cspp1         | 0.824 |
| Grb7          | 0.006 | 0.866 | 4.613  | 5.479  | 4.662  | 4.610  | 4.568  | 5.316  | 5.643  | Adcy6         | 0.823 |
| Cic           | 0.002 | 0.866 | 4.474  | 5.340  | 4.485  | 4.558  | 4.380  | 5.266  | 5.415  | Cic           | 0.823 |
| Ccnj          | 0.009 | 0.866 | 1.625  | 2.491  | 1.603  | 1.533  | 1.740  | 2.327  | 2.655  | Actb          | 0.822 |
| Col11a2       | 0.008 | 0.864 | 1.685  | 2.550  | 1.753  | 1.505  | 1.799  | 2.461  | 2.639  | Lactb2        | 0.820 |
| Tmem243       | 0.000 | 0.864 | 2.229  | 3.093  | 2.267  | 2.170  | 2.251  | 3.074  | 3.113  | Irf6          | 0.820 |
| Irf6          | 0.001 | 0.864 | 4.610  | 5.475  | 4.540  | 4.690  | 4.602  | 5.415  | 5.535  | Tmem243       | 0.820 |
| Wdtdc1        | 0.007 | 0.864 | 4.510  | 5.374  | 4.469  | 4.684  | 4.377  | 5.302  | 5.446  | Phlpp2        | 0.820 |
| Kcnb1         | 0.006 | 0.863 | 3.684  | 4.548  | 3.566  | 3.851  | 3.636  | 4.465  | 4.630  | Plagl2        | 0.820 |
| Adcy6         | 0.002 | 0.863 | 4.769  | 5.632  | 4.733  | 4.836  | 4.738  | 5.526  | 5.739  | Col11a2       | 0.817 |
| Lactb2        | 0.003 | 0.862 | 4.216  | 5.078  | 4.153  | 4.294  | 4.201  | 5.178  | 4.979  | Trp53i13      | 0.816 |
| Sh3d19        | 0.004 | 0.862 | 3.883  | 4.745  | 3.830  | 3.902  | 3.918  | 4.605  | 4.885  | Kcnb1         | 0.816 |
| Rps18         | 0.001 | 0.861 | 5.999  | 6.860  | 6.085  | 5.920  | 5.991  | 6.854  | 6.867  | H2-Aa         | 0.815 |
| Dgkh          | 0.000 | 0.861 | 2.126  | 2.987  | 2.048  | 2.183  | 2.148  | 2.983  | 2.991  | Plppr2        | 0.815 |
| H2-Aa         | 0.000 | 0.861 | 0.728  | 1.589  | 0.731  | 0.781  | 0.672  | 1.574  | 1.604  | Brd4          | 0.815 |
| Brd4          | 0.000 | 0.860 | 4.303  | 5.163  | 4.319  | 4.275  | 4.314  | 5.156  | 5.170  | Dgkh          | 0.815 |
| Cdon          | 0.004 | 0.860 | 3.434  | 4.294  | 3.341  | 3.554  | 3.407  | 4.377  | 4.211  | Rps18         | 0.815 |
| 1700112D23Rik | 0.005 | 0.860 | 3.291  | 4.151  | 3.124  | 3.317  | 3.433  | 4.143  | 4.159  | Wdtdc1        | 0.815 |
| Rac3          | 0.004 | 0.860 | 1.709  | 2.569  | 1.848  | 1.721  | 1.558  | 2.544  | 2.594  | Cdon          | 0.815 |
| Ddi2          | 0.001 | 0.859 | 3.898  | 4.757  | 3.814  | 4.008  | 3.870  | 4.768  | 4.745  | Gm13199       | 0.812 |
| Gm13199       | 0.008 | 0.858 | 1.492  | 2.350  | 1.347  | 1.502  | 1.626  | 2.464  | 2.235  | Phldb1        | 0.811 |
| Spred1        | 0.003 | 0.857 | 2.514  | 3.371  | 2.385  | 2.532  | 2.624  | 3.388  | 3.354  | Ddi2          | 0.811 |
| Fam126a       | 0.004 | 0.857 | 1.196  | 2.052  | 1.042  | 1.297  | 1.247  | 2.001  | 2.103  | Atp13a3       | 0.811 |
| Plppr2        | 0.005 | 0.857 | 4.724  | 5.581  | 4.759  | 4.792  | 4.622  | 5.456  | 5.706  | Cnot6         | 0.811 |
| Atp13a3       | 0.000 | 0.856 | 4.451  | 5.308  | 4.414  | 4.473  | 4.466  | 5.270  | 5.345  | Tmem198b      | 0.810 |
| Zfp282        | 0.001 | 0.856 | 2.921  | 3.777  | 2.925  | 2.993  | 2.846  | 3.720  | 3.835  | Zfp282        | 0.810 |
| Cnot6         | 0.000 | 0.856 | 4.325  | 5.181  | 4.330  | 4.344  | 4.302  | 5.136  | 5.226  | Ptma          | 0.810 |
| Ptma          | 0.000 | 0.856 | 7.280  | 8.136  | 7.310  | 7.307  | 7.225  | 8.161  | 8.111  | Rac3          | 0.809 |
| Trp53i13      | 0.005 | 0.855 | 5.039  | 5.895  | 5.102  | 5.037  | 4.978  | 5.757  | 6.032  | Apool         | 0.808 |
| Emilin1       | 0.000 | 0.855 | 6.395  | 7.250  | 6.329  | 6.430  | 6.426  | 7.248  | 7.253  | Emilin1       | 0.808 |
| Lcmt2         | 0.001 | 0.855 | 3.414  | 4.268  | 3.437  | 3.325  | 3.478  | 4.239  | 4.298  | 1700112D23Rik | 0.808 |
| Ptger1        | 0.001 | 0.854 | -0.199 | 0.656  | -0.095 | -0.234 | -0.266 | 0.688  | 0.623  | Spred1        | 0.807 |
| Tfap4         | 0.003 | 0.854 | 1.945  | 2.799  | 1.976  | 2.061  | 1.798  | 2.780  | 2.818  | Lcmt2         | 0.807 |
| Zfas1         | 0.006 | 0.854 | 3.847  | 4.701  | 3.857  | 3.991  | 3.694  | 4.640  | 4.761  | Fam126a       | 0.807 |
| Spata5l1      | 0.004 | 0.852 | 2.564  | 3.416  | 2.565  | 2.701  | 2.426  | 3.433  | 3.400  | Ptger1        | 0.806 |
| Lrrc58        | 0.001 | 0.852 | 4.168  | 5.020  | 4.132  | 4.263  | 4.108  | 4.988  | 5.052  | Extl3         | 0.805 |
| Ppp1r14b      | 0.004 | 0.852 | 4.269  | 5.121  | 4.321  | 4.348  | 4.137  | 5.212  | 5.030  | Ppp1r14b      | 0.805 |
| 4921531C22Rik | 0.002 | 0.852 | 2.235  | 3.087  | 2.320  | 2.141  | 2.245  | 3.023  | 3.152  | Git2          | 0.805 |
| Git2          | 0.001 | 0.851 | 2.131  | 2.982  | 2.081  | 2.111  | 2.200  | 2.914  | 3.049  | Lmf2          | 0.804 |
| 6330403L08Rik | 0.004 | 0.851 | 2.393  | 3.244  | 2.413  | 2.526  | 2.241  | 3.257  | 3.232  | 4921531C22Rik | 0.804 |
| Extl3         | 0.006 | 0.851 | 4.563  | 5.414  | 4.495  | 4.700  | 4.494  | 5.298  | 5.530  | Lrrc58        | 0.804 |
| Phldb1        | 0.008 | 0.850 | 2.569  | 3.419  | 2.547  | 2.487  | 2.673  | 3.261  | 3.577  | Pgm2          | 0.803 |
| Tmem198b      | 0.005 | 0.850 | 1.224  | 2.074  | 1.292  | 1.201  | 1.179  | 1.933  | 2.215  | Tfap4         | 0.803 |
| Lmf2          | 0.001 | 0.850 | 4.114  | 4.964  | 4.095  | 4.142  | 4.106  | 4.894  | 5.034  | Zfas1         | 0.802 |
| Pgm2          | 0.002 | 0.850 | 4.422  | 5.272  | 4.376  | 4.371  | 4.519  | 5.357  | 5.187  | Mtf2          | 0.801 |
| Ttc39b        | 0.000 | 0.849 | 4.885  | 5.734  | 4.834  | 4.886  | 4.936  | 5.722  | 5.746  | Tfdp2         | 0.801 |
| Esrra         | 0.000 | 0.849 | 3.108  | 3.957  | 3.086  | 3.071  | 3.168  | 3.975  | 3.939  | Ttc39b        | 0.800 |
| Tcn2          | 0.003 | 0.847 | 6.554  | 7.402  | 6.464  | 6.706  | 6.493  | 7.397  | 7.406  | Esrra         | 0.800 |
| Fam149a       | 0.000 | 0.847 | 2.519  | 3.366  | 2.538  | 2.540  | 2.479  | 3.347  | 3.384  | Spata5l1      | 0.800 |
| Rncr4         | 0.010 | 0.847 | 0.153  | 1.000  | 0.317  | 0.199  | -0.057 | 1.022  | 0.977  | Ap1s3         | 0.799 |

|          |       |       |       |       |       |       |       |       |       |               |       |
|----------|-------|-------|-------|-------|-------|-------|-------|-------|-------|---------------|-------|
| Ak3      | 0.000 | 0.847 | 5.136 | 5.982 | 5.107 | 5.097 | 5.203 | 5.964 | 6.000 | Top2b         | 0.799 |
| Tet2     | 0.000 | 0.846 | 3.065 | 3.911 | 3.100 | 3.035 | 3.060 | 3.887 | 3.935 | Fam149a       | 0.798 |
| Leng1    | 0.003 | 0.846 | 3.378 | 4.225 | 3.283 | 3.508 | 3.343 | 4.263 | 4.186 | Tet2          | 0.798 |
| Ap1s3    | 0.001 | 0.846 | 2.874 | 3.720 | 2.856 | 2.946 | 2.819 | 3.649 | 3.791 | 6330403L08Rik | 0.798 |
| Snhg1    | 0.002 | 0.846 | 4.100 | 4.947 | 4.192 | 4.047 | 4.062 | 4.879 | 5.015 | Tia1          | 0.798 |
| Apool    | 0.009 | 0.846 | 1.927 | 2.773 | 1.985 | 1.954 | 1.842 | 2.601 | 2.944 | Snhg1         | 0.798 |
| Brd1     | 0.002 | 0.846 | 4.451 | 5.296 | 4.355 | 4.521 | 4.477 | 5.232 | 5.361 | Ak3           | 0.797 |
| Tfdp2    | 0.003 | 0.845 | 3.478 | 4.323 | 3.408 | 3.529 | 3.497 | 4.212 | 4.433 | Mospd2        | 0.797 |
| Top2b    | 0.001 | 0.845 | 3.854 | 4.699 | 3.830 | 3.864 | 3.867 | 4.620 | 4.777 | Brd1          | 0.797 |
| Gm22478  | 0.001 | 0.845 | 3.437 | 4.281 | 3.368 | 3.430 | 3.512 | 4.216 | 4.347 | Gm22478       | 0.796 |
| Abl2     | 0.000 | 0.845 | 3.140 | 3.985 | 3.078 | 3.185 | 3.158 | 3.958 | 4.011 | Eci2          | 0.796 |
| Mospd2   | 0.005 | 0.844 | 3.388 | 4.232 | 3.328 | 3.514 | 3.321 | 4.124 | 4.340 | Abl2          | 0.795 |
| Smox     | 0.009 | 0.843 | 1.527 | 2.371 | 1.493 | 1.728 | 1.361 | 2.353 | 2.389 | Mbd6          | 0.795 |
| Zbtb4    | 0.000 | 0.843 | 4.571 | 5.414 | 4.545 | 4.633 | 4.535 | 5.411 | 5.417 | Leng1         | 0.795 |
| Rnf138   | 0.001 | 0.843 | 2.398 | 3.241 | 2.376 | 2.506 | 2.314 | 3.236 | 3.247 | Tcn2          | 0.794 |
| Eci2     | 0.004 | 0.843 | 3.523 | 4.365 | 3.484 | 3.451 | 3.633 | 4.259 | 4.472 | Zbtb4         | 0.793 |
| Tmem41a  | 0.002 | 0.843 | 3.890 | 4.732 | 3.894 | 4.005 | 3.769 | 4.747 | 4.718 | Sgpp1         | 0.793 |
| Pcdhga9  | 0.004 | 0.842 | 0.204 | 1.047 | 0.200 | 0.321 | 0.092 | 0.972 | 1.121 | Asxl1         | 0.792 |
| Ncoa1    | 0.004 | 0.842 | 4.537 | 5.378 | 4.495 | 4.690 | 4.426 | 5.331 | 5.426 | Pcdhga9       | 0.791 |
| Actg1    | 0.001 | 0.842 | 7.444 | 8.285 | 7.508 | 7.348 | 7.476 | 8.247 | 8.324 | Rnf138        | 0.791 |
| Sgpp1    | 0.003 | 0.841 | 5.261 | 6.102 | 5.237 | 5.194 | 5.353 | 6.016 | 6.189 | Actg1         | 0.791 |
| Tia1     | 0.004 | 0.841 | 3.418 | 4.258 | 3.474 | 3.381 | 3.398 | 4.125 | 4.392 | Prdm10        | 0.790 |
| Mbd6     | 0.005 | 0.841 | 5.938 | 6.778 | 5.972 | 6.000 | 5.841 | 6.656 | 6.901 | Tmem41a       | 0.789 |
| Ino80b   | 0.002 | 0.840 | 3.748 | 4.589 | 3.836 | 3.784 | 3.625 | 4.548 | 4.630 | Kdm6a         | 0.788 |
| Mtf2     | 0.007 | 0.840 | 3.183 | 4.023 | 3.128 | 3.225 | 3.198 | 3.859 | 4.188 | Rncr4         | 0.788 |
| Agpat3   | 0.001 | 0.838 | 5.456 | 6.294 | 5.393 | 5.552 | 5.423 | 6.307 | 6.282 | Ino80b        | 0.788 |
| Sirt1    | 0.001 | 0.838 | 3.213 | 4.051 | 3.288 | 3.150 | 3.200 | 4.041 | 4.060 | Ncoa1         | 0.788 |
| Rasa1    | 0.004 | 0.837 | 4.275 | 5.112 | 4.203 | 4.408 | 4.213 | 5.027 | 5.196 | P3h4          | 0.787 |
| Cldn8    | 0.009 | 0.836 | 7.783 | 8.619 | 7.627 | 7.987 | 7.736 | 8.593 | 8.645 | Sirt1         | 0.786 |
| Szrd1    | 0.000 | 0.836 | 4.913 | 5.748 | 4.914 | 4.898 | 4.927 | 5.722 | 5.774 | Agpat3        | 0.786 |
| Prep     | 0.003 | 0.835 | 2.671 | 3.506 | 2.646 | 2.806 | 2.560 | 3.526 | 3.486 | Ctbp2         | 0.786 |
| Asxl1    | 0.004 | 0.835 | 3.460 | 4.296 | 3.491 | 3.457 | 3.433 | 4.155 | 4.436 | Rasa1         | 0.785 |
| P3h4     | 0.004 | 0.835 | 4.285 | 5.120 | 4.232 | 4.381 | 4.241 | 5.015 | 5.225 | Wasf2         | 0.785 |
| Prdm10   | 0.005 | 0.835 | 2.496 | 3.331 | 2.574 | 2.443 | 2.471 | 3.462 | 3.201 | Szrd1         | 0.785 |
| Creb3l1  | 0.000 | 0.835 | 5.490 | 6.325 | 5.514 | 5.417 | 5.539 | 6.348 | 6.301 | Acvr2b        | 0.785 |
| Sppl3    | 0.010 | 0.834 | 3.340 | 4.175 | 3.332 | 3.503 | 3.185 | 4.071 | 4.278 | Smox          | 0.784 |
| Ccdc157  | 0.002 | 0.834 | 3.819 | 4.654 | 3.770 | 3.922 | 3.766 | 4.599 | 4.708 | Creb3l1       | 0.783 |
| Ctbp2    | 0.008 | 0.834 | 2.530 | 3.364 | 2.668 | 2.437 | 2.486 | 3.232 | 3.496 | Slc37a1       | 0.782 |
| Slc37a1  | 0.001 | 0.834 | 3.897 | 4.731 | 3.895 | 3.963 | 3.833 | 4.673 | 4.789 | Tmem63a       | 0.782 |
| Cep112   | 0.004 | 0.834 | 0.252 | 1.085 | 0.354 | 0.137 | 0.265 | 1.163 | 1.008 | Ccdc157       | 0.782 |
| Plekhg3  | 0.004 | 0.833 | 3.919 | 4.752 | 3.835 | 4.081 | 3.840 | 4.757 | 4.747 | Cep112        | 0.781 |
| Slc22a15 | 0.001 | 0.832 | 1.702 | 2.535 | 1.754 | 1.604 | 1.750 | 2.555 | 2.514 | Sppl3         | 0.781 |
| Ppp4r1   | 0.001 | 0.832 | 3.631 | 4.463 | 3.582 | 3.736 | 3.576 | 4.469 | 4.458 | Prep          | 0.780 |
| Acvr2b   | 0.002 | 0.832 | 2.369 | 3.202 | 2.363 | 2.406 | 2.338 | 3.099 | 3.304 | Neurod1       | 0.780 |
| Tmem63a  | 0.002 | 0.832 | 5.462 | 6.294 | 5.439 | 5.528 | 5.420 | 6.204 | 6.384 | Tmem51        | 0.779 |
| Mex3c    | 0.002 | 0.831 | 4.032 | 4.863 | 4.036 | 4.128 | 3.931 | 4.834 | 4.892 | Slc22a15      | 0.779 |
| Kdm6a    | 0.005 | 0.831 | 3.726 | 4.557 | 3.689 | 3.766 | 3.722 | 4.706 | 4.408 | Prpf4         | 0.778 |
| Gm46620  | 0.001 | 0.831 | 4.211 | 5.042 | 4.249 | 4.250 | 4.133 | 5.024 | 5.059 | Ppp4r1        | 0.778 |
| Tada2b   | 0.004 | 0.830 | 4.247 | 5.077 | 4.196 | 4.404 | 4.141 | 5.064 | 5.091 | Gm46620       | 0.777 |
| Wasf2    | 0.004 | 0.830 | 4.134 | 4.964 | 4.110 | 4.167 | 4.125 | 4.832 | 5.096 | Cep70         | 0.777 |
| Tmem51   | 0.001 | 0.830 | 4.405 | 5.235 | 4.368 | 4.461 | 4.386 | 5.158 | 5.312 | Mex3c         | 0.777 |
| Zfx      | 0.004 | 0.830 | 3.140 | 3.970 | 3.033 | 3.108 | 3.279 | 3.920 | 4.019 | Ssh1          | 0.777 |
| Prpf4    | 0.001 | 0.829 | 3.881 | 4.710 | 3.867 | 3.927 | 3.850 | 4.636 | 4.785 | Smndc1        | 0.777 |
| Neurod1  | 0.003 | 0.828 | 7.393 | 8.220 | 7.446 | 7.372 | 7.360 | 8.107 | 8.334 | Plekhg3       | 0.776 |
| Slain1   | 0.000 | 0.827 | 3.824 | 4.651 | 3.813 | 3.860 | 3.798 | 4.671 | 4.632 | Cldn8         | 0.775 |
| Acad8    | 0.000 | 0.827 | 4.179 | 5.007 | 4.239 | 4.130 | 4.169 | 5.021 | 4.992 | Kmt5b         | 0.775 |
| Abhd13   | 0.001 | 0.827 | 4.312 | 5.139 | 4.275 | 4.360 | 4.301 | 5.086 | 5.192 | Ln timer      | 0.775 |
| Ssh1     | 0.003 | 0.827 | 3.122 | 3.949 | 3.068 | 3.197 | 3.102 | 3.852 | 4.046 | Prkcd         | 0.775 |
| Mbtd1    | 0.004 | 0.827 | 2.031 | 2.858 | 1.921 | 2.142 | 2.030 | 2.773 | 2.943 | Abhd13        | 0.775 |
| Slc40a1  | 0.003 | 0.826 | 4.884 | 5.710 | 4.835 | 5.015 | 4.803 | 5.647 | 5.773 | Slain1        | 0.774 |
| Tnrc6a   | 0.002 | 0.826 | 4.579 | 5.405 | 4.552 | 4.697 | 4.490 | 5.369 | 5.441 | Zfx           | 0.774 |
| Pla2g2f  | 0.001 | 0.825 | 7.459 | 8.285 | 7.401 | 7.537 | 7.440 | 8.334 | 8.235 | Mbtd1         | 0.773 |
| Smndc1   | 0.004 | 0.825 | 4.860 | 5.686 | 4.789 | 4.872 | 4.920 | 5.804 | 5.567 | Acad8         | 0.773 |
| Cep70    | 0.004 | 0.825 | 4.117 | 4.942 | 4.050 | 4.140 | 4.160 | 4.818 | 5.065 | Tada2b        | 0.773 |
| Mtarc2   | 0.000 | 0.825 | 4.185 | 5.010 | 4.148 | 4.250 | 4.158 | 5.042 | 4.978 | Pla2g2f       | 0.772 |
| Pqlc3    | 0.009 | 0.825 | 1.026 | 1.850 | 0.942 | 1.233 | 0.902 | 1.854 | 1.847 | Tsc22d2       | 0.772 |

|          |       |       |       |       |       |       |       |       |       |            |       |
|----------|-------|-------|-------|-------|-------|-------|-------|-------|-------|------------|-------|
| Tsc22d2  | 0.002 | 0.824 | 2.936 | 3.759 | 2.878 | 3.012 | 2.917 | 3.842 | 3.677 | Mtarc2     | 0.771 |
| Prkcd    | 0.002 | 0.824 | 3.011 | 3.834 | 2.983 | 3.020 | 3.029 | 3.725 | 3.944 | Slc40a1    | 0.770 |
| Ln timer | 0.003 | 0.823 | 3.021 | 3.844 | 2.999 | 3.019 | 3.044 | 3.726 | 3.961 | Parp4      | 0.770 |
| Adss     | 0.002 | 0.823 | 3.843 | 4.666 | 3.865 | 3.928 | 3.735 | 4.642 | 4.689 | Tnrc6a     | 0.770 |
| Parp4    | 0.002 | 0.822 | 3.474 | 4.296 | 3.438 | 3.527 | 3.458 | 4.207 | 4.385 | Spint1     | 0.767 |
| Kmt5b    | 0.005 | 0.821 | 3.564 | 4.385 | 3.569 | 3.597 | 3.527 | 4.238 | 4.532 | Adss       | 0.766 |
| Dnai2    | 0.002 | 0.820 | 0.881 | 1.701 | 0.983 | 0.774 | 0.886 | 1.655 | 1.747 | Rpl34      | 0.765 |
| Dsg2     | 0.003 | 0.819 | 3.653 | 4.472 | 3.585 | 3.793 | 3.581 | 4.450 | 4.494 | Dyrk2      | 0.764 |
| Nfatc2   | 0.004 | 0.819 | 2.322 | 3.141 | 2.424 | 2.202 | 2.341 | 3.074 | 3.209 | Ptbp2      | 0.764 |
| Spint1   | 0.004 | 0.819 | 7.057 | 7.876 | 7.021 | 7.157 | 6.994 | 7.768 | 7.984 | Dnai2      | 0.763 |
| Ano9     | 0.000 | 0.818 | 1.311 | 2.129 | 1.260 | 1.301 | 1.373 | 2.138 | 2.121 | Fchsd2     | 0.763 |
| Lifr     | 0.001 | 0.818 | 4.803 | 5.621 | 4.718 | 4.884 | 4.808 | 5.594 | 5.649 | Nfatc2     | 0.762 |
| Ptbp2    | 0.002 | 0.817 | 3.108 | 3.926 | 3.120 | 3.051 | 3.155 | 3.837 | 4.014 | Ano9       | 0.762 |
| Rpl34    | 0.002 | 0.817 | 5.045 | 5.862 | 5.020 | 5.108 | 5.007 | 5.767 | 5.957 | Map7d1     | 0.762 |
| Cchcr1   | 0.001 | 0.817 | 1.570 | 2.387 | 1.653 | 1.475 | 1.583 | 2.360 | 2.414 | Pqlc3      | 0.762 |
| Frmd8    | 0.000 | 0.817 | 1.658 | 2.474 | 1.666 | 1.714 | 1.592 | 2.476 | 2.472 | Zranb1     | 0.761 |
| Map7d1   | 0.005 | 0.816 | 5.678 | 6.494 | 5.723 | 5.752 | 5.557 | 6.596 | 6.392 | Lifr       | 0.761 |
| Zranb1   | 0.001 | 0.816 | 5.255 | 6.071 | 5.283 | 5.192 | 5.289 | 6.011 | 6.131 | Dsg2       | 0.761 |
| Dyrk2    | 0.003 | 0.816 | 4.817 | 5.633 | 4.761 | 4.832 | 4.858 | 5.525 | 5.741 | Ocln       | 0.760 |
| Arid1b   | 0.006 | 0.816 | 3.487 | 4.303 | 3.390 | 3.633 | 3.438 | 4.219 | 4.387 | Frmd8      | 0.760 |
| Enah     | 0.003 | 0.816 | 3.426 | 4.241 | 3.331 | 3.531 | 3.415 | 4.180 | 4.303 | Cchcr1     | 0.759 |
| Tmem170b | 0.001 | 0.814 | 3.212 | 4.026 | 3.167 | 3.176 | 3.292 | 3.991 | 4.061 | Enah       | 0.759 |
| Dnph1    | 0.004 | 0.814 | 1.881 | 2.695 | 1.820 | 1.802 | 2.022 | 2.637 | 2.754 | Arid1b     | 0.758 |
| Adam15   | 0.000 | 0.814 | 1.800 | 2.614 | 1.857 | 1.805 | 1.738 | 2.622 | 2.605 | Gpcpd1     | 0.758 |
| Gpcpd1   | 0.004 | 0.813 | 3.847 | 4.660 | 3.946 | 3.761 | 3.833 | 4.562 | 4.758 | Tmem170b   | 0.758 |
| Ocln     | 0.002 | 0.813 | 3.272 | 4.085 | 3.291 | 3.217 | 3.307 | 3.981 | 4.188 | Adam15     | 0.757 |
| Fchsd2   | 0.007 | 0.813 | 2.914 | 3.727 | 2.863 | 2.876 | 3.004 | 3.584 | 3.869 | Mcur1      | 0.756 |
| Lgl2     | 0.002 | 0.812 | 5.625 | 6.438 | 5.690 | 5.656 | 5.530 | 6.487 | 6.389 | Gm15265    | 0.755 |
| Pdpf     | 0.003 | 0.811 | 3.830 | 4.642 | 3.792 | 3.939 | 3.761 | 4.565 | 4.719 | Ddb2       | 0.755 |
| Gm15265  | 0.007 | 0.811 | 2.081 | 2.893 | 1.944 | 2.192 | 2.108 | 2.783 | 3.002 | Dnph1      | 0.755 |
| Clcn3    | 0.001 | 0.811 | 4.320 | 5.131 | 4.244 | 4.414 | 4.301 | 5.103 | 5.158 | Lgl2       | 0.755 |
| Cobl1    | 0.000 | 0.811 | 4.262 | 5.073 | 4.227 | 4.308 | 4.249 | 5.037 | 5.108 | Pdpf       | 0.755 |
| Rab5if   | 0.000 | 0.811 | 2.767 | 3.578 | 2.715 | 2.827 | 2.758 | 3.610 | 3.546 | Cobl1      | 0.755 |
| Mcur1    | 0.001 | 0.811 | 4.157 | 4.968 | 4.123 | 4.189 | 4.158 | 4.895 | 5.041 | Prkd2      | 0.754 |
| Cnppd1   | 0.005 | 0.810 | 4.318 | 5.128 | 4.234 | 4.454 | 4.266 | 5.037 | 5.220 | Rab5if     | 0.754 |
| Tnks     | 0.002 | 0.810 | 4.444 | 5.254 | 4.364 | 4.571 | 4.397 | 5.230 | 5.278 | Tmod3      | 0.754 |
| Ddb2     | 0.003 | 0.810 | 2.127 | 2.937 | 2.032 | 2.168 | 2.180 | 2.842 | 3.031 | N4bp2      | 0.753 |
| Gm30648  | 0.000 | 0.810 | 5.341 | 6.151 | 5.290 | 5.381 | 5.352 | 6.110 | 6.191 | Cnppd1     | 0.753 |
| Asah1    | 0.002 | 0.809 | 7.061 | 7.870 | 7.010 | 7.162 | 7.009 | 7.816 | 7.923 | Gm30648    | 0.753 |
| Pcnx     | 0.005 | 0.808 | 4.042 | 4.850 | 3.944 | 4.212 | 3.968 | 4.825 | 4.875 | Clcn3      | 0.753 |
| Zfp408   | 0.002 | 0.808 | 3.164 | 3.972 | 3.118 | 3.117 | 3.257 | 3.903 | 4.041 | Brd3       | 0.752 |
| Tmod3    | 0.003 | 0.807 | 2.965 | 3.772 | 2.938 | 2.924 | 3.034 | 3.663 | 3.882 | Asah1      | 0.751 |
| Zbtb43   | 0.000 | 0.807 | 3.004 | 3.811 | 3.009 | 2.951 | 3.051 | 3.838 | 3.783 | Zfp408     | 0.751 |
| Kmt5a    | 0.003 | 0.807 | 3.468 | 4.274 | 3.396 | 3.588 | 3.419 | 4.222 | 4.326 | Slc27a1    | 0.750 |
| Ranbp9   | 0.000 | 0.806 | 4.447 | 5.254 | 4.400 | 4.489 | 4.454 | 5.293 | 5.215 | Tnks       | 0.750 |
| Anxa4    | 0.000 | 0.806 | 5.536 | 6.342 | 5.576 | 5.467 | 5.563 | 6.368 | 6.315 | Foxp1      | 0.750 |
| Brd3     | 0.002 | 0.806 | 4.092 | 4.898 | 4.070 | 4.125 | 4.081 | 4.799 | 4.997 | Ggct       | 0.750 |
| Thbs3    | 0.000 | 0.806 | 2.858 | 3.664 | 2.842 | 2.830 | 2.903 | 3.641 | 3.687 | Sox12      | 0.749 |
| Atxn7l1  | 0.007 | 0.806 | 1.532 | 2.338 | 1.580 | 1.640 | 1.378 | 2.246 | 2.430 | Zbtb43     | 0.749 |
| Foxp1    | 0.001 | 0.806 | 2.445 | 3.250 | 2.433 | 2.467 | 2.434 | 3.176 | 3.324 | Bnip2      | 0.749 |
| Prkd2    | 0.007 | 0.805 | 2.639 | 3.445 | 2.588 | 2.733 | 2.597 | 3.303 | 3.587 | Ranbp9     | 0.749 |
| Gm50240  | 0.000 | 0.805 | 2.444 | 3.249 | 2.458 | 2.463 | 2.411 | 3.265 | 3.233 | Lypla1     | 0.748 |
| Lypla1   | 0.000 | 0.805 | 3.467 | 4.273 | 3.455 | 3.476 | 3.472 | 4.233 | 4.313 | Slc25a36   | 0.748 |
| Slc27a1  | 0.001 | 0.805 | 3.516 | 4.321 | 3.527 | 3.505 | 3.514 | 4.238 | 4.404 | Thbs3      | 0.748 |
| N4bp2    | 0.006 | 0.804 | 2.644 | 3.448 | 2.670 | 2.699 | 2.563 | 3.307 | 3.590 | Anxa4      | 0.748 |
| Capn2    | 0.003 | 0.804 | 4.187 | 4.991 | 4.062 | 4.266 | 4.234 | 4.943 | 5.040 | Gm50240    | 0.748 |
| Sec24a   | 0.002 | 0.804 | 3.564 | 4.368 | 3.509 | 3.649 | 3.535 | 4.454 | 4.283 | Sec24a     | 0.747 |
| Crmp1    | 0.004 | 0.804 | 3.354 | 4.157 | 3.469 | 3.316 | 3.277 | 4.069 | 4.246 | Ppp4r1l-ps | 0.747 |
| Tesk1    | 0.001 | 0.803 | 3.759 | 4.562 | 3.720 | 3.728 | 3.830 | 4.533 | 4.592 | Kmt5a      | 0.747 |
| Zbtb10   | 0.000 | 0.803 | 2.937 | 3.739 | 2.918 | 2.894 | 2.997 | 3.754 | 3.725 | Atxn7l1    | 0.746 |
| Ggct     | 0.007 | 0.803 | 1.053 | 1.855 | 1.147 | 1.008 | 1.003 | 1.991 | 1.719 | Arl5b      | 0.746 |
| Sox12    | 0.004 | 0.802 | 3.096 | 3.898 | 3.152 | 3.098 | 3.037 | 3.773 | 4.023 | Crmp1      | 0.746 |
| Gdap1l1  | 0.000 | 0.801 | 5.750 | 6.551 | 5.694 | 5.813 | 5.742 | 6.575 | 6.528 | Pcnx       | 0.745 |
| Vegfa    | 0.000 | 0.801 | 8.049 | 8.850 | 8.074 | 8.048 | 8.025 | 8.805 | 8.896 | Tesk1      | 0.744 |
| Bnip2    | 0.004 | 0.801 | 3.678 | 4.479 | 3.654 | 3.659 | 3.720 | 4.354 | 4.604 | Capn2      | 0.744 |
| Dvl1     | 0.000 | 0.801 | 4.845 | 5.646 | 4.881 | 4.783 | 4.870 | 5.610 | 5.682 | Zbtb10     | 0.744 |

|               |       |       |        |       |        |       |        |       |       |               |       |
|---------------|-------|-------|--------|-------|--------|-------|--------|-------|-------|---------------|-------|
| Serhl         | 0.002 | 0.801 | 0.771  | 1.572 | 0.833  | 0.657 | 0.823  | 1.609 | 1.536 | Vegfa         | 0.744 |
| Sbno2         | 0.005 | 0.800 | 2.120  | 2.921 | 2.161  | 2.193 | 2.006  | 3.018 | 2.824 | Prkag2os2     | 0.743 |
| Helb          | 0.005 | 0.800 | 2.240  | 3.040 | 2.191  | 2.126 | 2.403  | 3.056 | 3.025 | Phf12         | 0.743 |
| H2ax          | 0.002 | 0.800 | 4.750  | 5.550 | 4.726  | 4.827 | 4.698  | 5.624 | 5.476 | St6galnac5    | 0.743 |
| Ehhadh        | 0.004 | 0.800 | 6.228  | 7.028 | 6.120  | 6.353 | 6.211  | 6.968 | 7.089 | Sbno2         | 0.743 |
| Ppp4r1l-ps    | 0.004 | 0.800 | 4.424  | 5.225 | 4.482  | 4.391 | 4.400  | 5.101 | 5.348 | H2ax          | 0.742 |
| Prkag2os2     | 0.002 | 0.800 | 0.512  | 1.312 | 0.553  | 0.535 | 0.447  | 1.396 | 1.227 | Dvl1          | 0.742 |
| Ssh2          | 0.008 | 0.800 | 1.839  | 2.639 | 1.648  | 1.967 | 1.903  | 2.609 | 2.670 | Prr12         | 0.742 |
| Prr12         | 0.006 | 0.800 | 4.266  | 5.066 | 4.233  | 4.392 | 4.173  | 4.958 | 5.174 | Fam160a2      | 0.742 |
| Ube2i         | 0.004 | 0.799 | 4.326  | 5.125 | 4.381  | 4.385 | 4.212  | 5.033 | 5.218 | Gdap1l1       | 0.742 |
| St6galnac5    | 0.002 | 0.799 | 2.803  | 3.602 | 2.850  | 2.812 | 2.748  | 3.502 | 3.702 | Ube2i         | 0.741 |
| Phf12         | 0.003 | 0.798 | 4.763  | 5.561 | 4.797  | 4.775 | 4.716  | 5.453 | 5.669 | Serhl         | 0.740 |
| Zfp691        | 0.002 | 0.798 | 3.037  | 3.835 | 3.004  | 2.987 | 3.119  | 3.903 | 3.767 | Orai1         | 0.740 |
| Zfp597        | 0.001 | 0.798 | 3.002  | 3.799 | 2.956  | 2.997 | 3.052  | 3.734 | 3.865 | Zfp597        | 0.740 |
| Cenps         | 0.008 | 0.797 | 2.014  | 2.811 | 1.871  | 2.060 | 2.111  | 2.927 | 2.696 | A930004J17Rik | 0.739 |
| A930004J17Rik | 0.002 | 0.797 | 2.396  | 3.193 | 2.448  | 2.422 | 2.318  | 3.110 | 3.277 | Zfp691        | 0.739 |
| Chd1          | 0.002 | 0.797 | 3.372  | 4.169 | 3.265  | 3.459 | 3.392  | 4.209 | 4.129 | Six5          | 0.739 |
| Xpo6          | 0.002 | 0.797 | 3.452  | 4.249 | 3.418  | 3.534 | 3.404  | 4.184 | 4.315 | Ehhadh        | 0.739 |
| Arl5b         | 0.006 | 0.797 | 2.495  | 3.292 | 2.448  | 2.525 | 2.511  | 3.442 | 3.141 | Cenps         | 0.739 |
| Six5          | 0.007 | 0.797 | 4.751  | 5.548 | 4.723  | 4.875 | 4.656  | 5.434 | 5.663 | 2810021J22Rik | 0.738 |
| Dusp1         | 0.007 | 0.797 | 8.212  | 9.008 | 8.314  | 8.060 | 8.261  | 9.092 | 8.925 | Zbtb8a        | 0.738 |
| Dlg5          | 0.002 | 0.796 | 3.880  | 4.676 | 3.850  | 3.989 | 3.800  | 4.644 | 4.708 | Xpo6          | 0.738 |
| 5430405H02Rik | 0.004 | 0.796 | 0.440  | 1.236 | 0.309  | 0.506 | 0.505  | 1.169 | 1.304 | Rfxank        | 0.736 |
| Zbtb8a        | 0.001 | 0.796 | 2.617  | 3.413 | 2.595  | 2.580 | 2.676  | 3.492 | 3.335 | Chd1          | 0.736 |
| Slc25a36      | 0.009 | 0.795 | 4.906  | 5.701 | 4.922  | 4.894 | 4.903  | 5.527 | 5.876 | Helb          | 0.736 |
| 2810021J22Rik | 0.001 | 0.795 | 3.716  | 4.512 | 3.693  | 3.762 | 3.693  | 4.427 | 4.597 | Rbm4b         | 0.735 |
| Proser3       | 0.000 | 0.795 | 1.452  | 2.247 | 1.431  | 1.481 | 1.444  | 2.266 | 2.228 | H1f0          | 0.735 |
| Orai1         | 0.004 | 0.795 | 2.228  | 3.023 | 2.292  | 2.192 | 2.200  | 2.898 | 3.148 | Dusp1         | 0.735 |
| Tceal8        | 0.002 | 0.794 | 5.873  | 6.667 | 5.810  | 5.826 | 5.983  | 6.721 | 6.614 | Proser3       | 0.735 |
| H1f0          | 0.001 | 0.794 | 7.541  | 8.334 | 7.518  | 7.517 | 7.586  | 8.266 | 8.402 | 5430405H02Rik | 0.735 |
| Rbm4b         | 0.001 | 0.793 | 2.396  | 3.190 | 2.376  | 2.439 | 2.374  | 3.111 | 3.268 | Dlg5          | 0.734 |
| Gm15601       | 0.001 | 0.793 | -0.033 | 0.760 | -0.061 | 0.054 | -0.094 | 0.762 | 0.758 | Ssh2          | 0.734 |
| Dvl2          | 0.004 | 0.793 | 2.594  | 3.387 | 2.614  | 2.696 | 2.472  | 3.319 | 3.456 | Tceal8        | 0.732 |
| Mknk1         | 0.000 | 0.793 | 4.496  | 5.289 | 4.525  | 4.513 | 4.451  | 5.323 | 5.255 | Mknk1         | 0.732 |
| Fam160a2      | 0.008 | 0.792 | 3.593  | 4.385 | 3.627  | 3.614 | 3.536  | 4.221 | 4.548 | Wnk2          | 0.731 |
| Rfxank        | 0.004 | 0.792 | 2.171  | 2.963 | 2.164  | 2.232 | 2.119  | 2.848 | 3.079 | Gm15601       | 0.731 |
| Fdx1          | 0.002 | 0.792 | 3.238  | 4.029 | 3.280  | 3.298 | 3.136  | 4.095 | 3.964 | Dvl2          | 0.731 |
| Gcn1          | 0.002 | 0.790 | 3.523  | 4.314 | 3.544  | 3.610 | 3.416  | 4.318 | 4.310 | Pkd2          | 0.731 |
| Tom1l1        | 0.000 | 0.790 | 2.520  | 3.309 | 2.546  | 2.488 | 2.525  | 3.282 | 3.336 | Fdx1          | 0.731 |
| Igsf9b        | 0.000 | 0.789 | 3.003  | 3.792 | 3.055  | 2.969 | 2.984  | 3.779 | 3.806 | Tom1l1        | 0.729 |
| 1700109K24Rik | 0.004 | 0.788 | 1.574  | 2.362 | 1.551  | 1.476 | 1.695  | 2.297 | 2.427 | Igsf9b        | 0.728 |
| Kdm5b         | 0.006 | 0.787 | 3.111  | 3.898 | 3.044  | 3.240 | 3.050  | 3.796 | 4.000 | Gcn1          | 0.727 |
| Cnnm4         | 0.001 | 0.787 | 1.774  | 2.560 | 1.780  | 1.839 | 1.702  | 2.528 | 2.593 | Kdm5b         | 0.726 |
| Ppp1r13l      | 0.001 | 0.786 | 2.018  | 2.803 | 2.062  | 2.003 | 1.988  | 2.884 | 2.723 | Ppp1r13l      | 0.726 |
| Wnk2          | 0.008 | 0.786 | 2.149  | 2.934 | 2.070  | 2.150 | 2.226  | 2.786 | 3.082 | 1700109K24Rik | 0.725 |
| Srrm3         | 0.004 | 0.785 | 2.955  | 3.741 | 3.062  | 2.922 | 2.883  | 3.646 | 3.835 | Srrm3         | 0.724 |
| Pkd2          | 0.009 | 0.785 | 4.580  | 5.365 | 4.530  | 4.677 | 4.533  | 5.209 | 5.520 | Aifm3         | 0.724 |
| Znrf1         | 0.000 | 0.784 | 2.820  | 3.604 | 2.812  | 2.798 | 2.849  | 3.619 | 3.590 | Cnnm4         | 0.724 |
| 4931406C07Rik | 0.000 | 0.784 | 3.068  | 3.853 | 3.079  | 3.061 | 3.065  | 3.796 | 3.909 | 4931406C07Rik | 0.724 |
| Hipk1         | 0.007 | 0.784 | 4.198  | 4.982 | 4.106  | 4.355 | 4.133  | 4.898 | 5.067 | Fus           | 0.723 |
| Fbxo30        | 0.000 | 0.784 | 3.725  | 4.509 | 3.748  | 3.693 | 3.732  | 4.476 | 4.541 | Znrf1         | 0.722 |
| Fus           | 0.002 | 0.783 | 4.937  | 5.720 | 5.003  | 4.887 | 4.922  | 5.628 | 5.813 | Fbxo30        | 0.722 |
| Arhgdig       | 0.002 | 0.782 | 3.397  | 4.179 | 3.429  | 3.332 | 3.431  | 4.101 | 4.258 | Noc2l         | 0.722 |
| Ammecr1l      | 0.002 | 0.781 | 2.969  | 3.750 | 3.049  | 2.941 | 2.918  | 3.689 | 3.812 | Zkscan17      | 0.722 |
| Aifm3         | 0.004 | 0.781 | 1.619  | 2.400 | 1.633  | 1.582 | 1.643  | 2.275 | 2.525 | Arhgdig       | 0.722 |
| Itsn2         | 0.002 | 0.780 | 3.624  | 4.405 | 3.587  | 3.737 | 3.548  | 4.410 | 4.400 | Strn          | 0.720 |
| Gm50103       | 0.005 | 0.780 | 1.904  | 2.684 | 1.849  | 2.017 | 1.847  | 2.583 | 2.786 | Hipk1         | 0.720 |
| Sez6l         | 0.009 | 0.779 | 5.272  | 6.051 | 5.365  | 5.330 | 5.122  | 5.941 | 6.162 | Gm50103       | 0.719 |
| Lurap1l       | 0.001 | 0.779 | 5.029  | 5.808 | 4.972  | 5.106 | 5.008  | 5.832 | 5.784 | Ammecr1l      | 0.719 |
| Noc2l         | 0.004 | 0.779 | 4.350  | 5.128 | 4.314  | 4.374 | 4.361  | 5.253 | 5.003 | Sez6l         | 0.716 |
| Zkscan17      | 0.006 | 0.778 | 3.323  | 4.101 | 3.369  | 3.334 | 3.265  | 3.965 | 4.236 | Serinc3       | 0.716 |
| Galnt7        | 0.002 | 0.778 | 3.529  | 4.307 | 3.444  | 3.579 | 3.565  | 4.232 | 4.382 | Cbx3          | 0.716 |
| Ccdc50        | 0.001 | 0.777 | 3.959  | 4.737 | 3.887  | 4.002 | 3.989  | 4.699 | 4.774 | Galnt7        | 0.715 |
| Nr1h2         | 0.003 | 0.777 | 4.953  | 5.730 | 5.048  | 4.885 | 4.926  | 5.657 | 5.804 | Itsn2         | 0.715 |
| Ezr           | 0.005 | 0.777 | 6.471  | 7.249 | 6.377  | 6.602 | 6.435  | 7.319 | 7.178 | Lurap1l       | 0.715 |
| Serinc3       | 0.001 | 0.777 | 7.134  | 7.911 | 7.100  | 7.130 | 7.171  | 7.831 | 7.991 | Nr1h2         | 0.714 |

|            |       |       |        |       |        |       |        |       |       |            |       |
|------------|-------|-------|--------|-------|--------|-------|--------|-------|-------|------------|-------|
| Gys1       | 0.001 | 0.777 | 2.884  | 3.661 | 2.887  | 2.935 | 2.829  | 3.600 | 3.721 | Gys1       | 0.714 |
| Tent5c     | 0.001 | 0.776 | 5.401  | 6.177 | 5.364  | 5.484 | 5.357  | 6.119 | 6.235 | Ccdc50     | 0.714 |
| Nt5dc1     | 0.000 | 0.776 | 3.057  | 3.833 | 3.052  | 3.095 | 3.024  | 3.797 | 3.868 | Lcor       | 0.713 |
| Strn       | 0.009 | 0.775 | 3.398  | 4.172 | 3.365  | 3.461 | 3.367  | 4.013 | 4.332 | Lyn        | 0.712 |
| Lcor       | 0.002 | 0.774 | 3.262  | 4.037 | 3.262  | 3.217 | 3.308  | 3.952 | 4.122 | Ezr        | 0.712 |
| Cbx3       | 0.007 | 0.773 | 2.350  | 3.123 | 2.371  | 2.396 | 2.282  | 2.982 | 3.264 | Nt5dc1     | 0.712 |
| Whamm      | 0.000 | 0.773 | 4.528  | 5.301 | 4.538  | 4.476 | 4.569  | 5.340 | 5.261 | Tent5c     | 0.712 |
| Gm12183    | 0.002 | 0.771 | -0.050 | 0.721 | -0.118 | 0.000 | -0.033 | 0.631 | 0.811 | Foxp4      | 0.711 |
| Foxp4      | 0.004 | 0.771 | 5.355  | 6.126 | 5.373  | 5.397 | 5.296  | 6.010 | 6.242 | Abhd17c    | 0.710 |
| Bsn        | 0.004 | 0.771 | 3.633  | 4.404 | 3.581  | 3.760 | 3.557  | 4.330 | 4.477 | Gm12183    | 0.709 |
| Ech1       | 0.002 | 0.771 | 5.268  | 6.039 | 5.360  | 5.268 | 5.176  | 6.015 | 6.062 | Whamm      | 0.709 |
| Plekhn2    | 0.000 | 0.771 | 3.760  | 4.531 | 3.755  | 3.770 | 3.756  | 4.586 | 4.476 | Gm47976    | 0.709 |
| Lyn        | 0.007 | 0.771 | 1.340  | 2.110 | 1.311  | 1.290 | 1.418  | 2.247 | 1.973 | Plekhn2    | 0.707 |
| Xpot       | 0.002 | 0.770 | 5.078  | 5.848 | 4.994  | 5.178 | 5.061  | 5.879 | 5.818 | Suds3      | 0.706 |
| Gm37893    | 0.007 | 0.769 | 1.924  | 2.694 | 2.044  | 1.911 | 1.818  | 2.582 | 2.806 | Gm37893    | 0.706 |
| Abraxas1   | 0.002 | 0.769 | 1.737  | 2.506 | 1.779  | 1.800 | 1.630  | 2.470 | 2.542 | Bsn        | 0.705 |
| Abhd17c    | 0.003 | 0.769 | 4.312  | 5.081 | 4.284  | 4.318 | 4.335  | 5.198 | 4.965 | Unc93b1    | 0.705 |
| Unc93b1    | 0.001 | 0.769 | 3.724  | 4.493 | 3.750  | 3.672 | 3.751  | 4.435 | 4.551 | Nfat5      | 0.704 |
| Gm47976    | 0.007 | 0.769 | 2.062  | 2.831 | 2.002  | 2.028 | 2.155  | 2.958 | 2.703 | Ech1       | 0.704 |
| St6galnac4 | 0.001 | 0.769 | 2.445  | 3.214 | 2.422  | 2.515 | 2.398  | 3.158 | 3.269 | St6galnac4 | 0.704 |
| Polk       | 0.001 | 0.768 | 2.034  | 2.802 | 2.046  | 1.963 | 2.092  | 2.828 | 2.776 | Xpot       | 0.704 |
| Suds3      | 0.004 | 0.768 | 3.892  | 4.660 | 3.907  | 3.816 | 3.952  | 4.550 | 4.769 | Abraxas1   | 0.703 |
| Nfat5      | 0.003 | 0.768 | 4.899  | 5.667 | 4.827  | 4.963 | 4.907  | 5.580 | 5.755 | Polk       | 0.702 |
| Rp2        | 0.002 | 0.768 | 4.306  | 5.074 | 4.217  | 4.300 | 4.401  | 5.045 | 5.103 | Rp2        | 0.700 |
| Rexo1      | 0.002 | 0.766 | 3.634  | 4.401 | 3.713  | 3.663 | 3.527  | 4.356 | 4.445 | Gm31992    | 0.700 |
| Stard10    | 0.001 | 0.766 | 6.661  | 7.427 | 6.653  | 6.730 | 6.602  | 7.451 | 7.403 | Stard10    | 0.699 |
| Mfsd14a    | 0.003 | 0.765 | 3.840  | 4.606 | 3.781  | 3.968 | 3.773  | 4.604 | 4.607 | Slc41a1    | 0.699 |
| Qsox2      | 0.001 | 0.764 | 5.418  | 6.182 | 5.356  | 5.467 | 5.431  | 6.128 | 6.237 | Rexo1      | 0.699 |
| Polr3gl    | 0.002 | 0.763 | 4.840  | 5.604 | 4.821  | 4.917 | 4.783  | 5.535 | 5.672 | Qsox2      | 0.699 |
| Cdk13      | 0.003 | 0.763 | 3.336  | 4.099 | 3.221  | 3.382 | 3.406  | 4.045 | 4.154 | Lmbr1l     | 0.699 |
| Lmbr1l     | 0.002 | 0.763 | 2.921  | 3.684 | 2.869  | 2.903 | 2.992  | 3.599 | 3.769 | Tsc22d4    | 0.698 |
| Gm31992    | 0.008 | 0.762 | 2.583  | 3.346 | 2.468  | 2.656 | 2.626  | 3.219 | 3.472 | Polr3gl    | 0.698 |
| Tmcc1      | 0.000 | 0.762 | 0.984  | 1.746 | 0.969  | 1.003 | 0.979  | 1.780 | 1.713 | Tmcc1      | 0.697 |
| Tnks1bp1   | 0.002 | 0.762 | 3.341  | 4.103 | 3.387  | 3.403 | 3.233  | 4.068 | 4.138 | Glis2      | 0.697 |
| Ski        | 0.007 | 0.762 | 4.605  | 5.367 | 4.555  | 4.770 | 4.491  | 5.311 | 5.424 | Mfsd14a    | 0.697 |
| Tsc22d4    | 0.001 | 0.762 | 3.390  | 4.152 | 3.415  | 3.405 | 3.351  | 4.071 | 4.234 | Bphl       | 0.696 |
| Glis2      | 0.002 | 0.762 | 4.117  | 4.879 | 4.071  | 4.181 | 4.101  | 4.806 | 4.952 | Cdk13      | 0.696 |
| Rbm15      | 0.000 | 0.761 | 3.023  | 3.784 | 3.028  | 2.967 | 3.074  | 3.773 | 3.795 | Abhd15     | 0.695 |
| Bphl       | 0.002 | 0.761 | 4.051  | 4.811 | 4.103  | 4.044 | 4.005  | 4.731 | 4.892 | Zfp760     | 0.694 |
| Calb1      | 0.009 | 0.761 | 1.873  | 2.634 | 1.755  | 1.802 | 2.063  | 2.664 | 2.604 | Rbm15      | 0.694 |
| Itgav      | 0.009 | 0.760 | 5.343  | 6.104 | 5.238  | 5.535 | 5.257  | 6.094 | 6.113 | Plekhh1    | 0.694 |
| Plekhh1    | 0.001 | 0.760 | 3.193  | 3.952 | 3.178  | 3.229 | 3.170  | 4.011 | 3.894 | Tnks1bp1   | 0.694 |
| Cdc34      | 0.000 | 0.759 | 5.498  | 6.257 | 5.468  | 5.528 | 5.498  | 6.309 | 6.205 | Pou2f1     | 0.694 |
| Slc36a1    | 0.001 | 0.759 | 5.018  | 5.777 | 4.937  | 5.068 | 5.048  | 5.721 | 5.832 | Cdc34      | 0.693 |
| Abhd15     | 0.003 | 0.758 | 3.549  | 4.307 | 3.522  | 3.531 | 3.594  | 4.202 | 4.411 | Slc36a1    | 0.692 |
| Trak1      | 0.003 | 0.757 | 3.959  | 4.716 | 3.908  | 4.066 | 3.902  | 4.787 | 4.644 | Trps1      | 0.692 |
| Slc41a1    | 0.008 | 0.757 | 3.075  | 3.832 | 3.110  | 3.072 | 3.044  | 3.679 | 3.986 | Ski        | 0.691 |
| Engase     | 0.000 | 0.757 | 1.754  | 2.511 | 1.731  | 1.727 | 1.804  | 2.510 | 2.512 | Cpt2       | 0.690 |
| Trps1      | 0.004 | 0.757 | 1.531  | 2.288 | 1.446  | 1.538 | 1.610  | 2.191 | 2.386 | Trak1      | 0.690 |
| Cpt2       | 0.004 | 0.756 | 5.411  | 6.168 | 5.406  | 5.508 | 5.320  | 6.079 | 6.256 | Engase     | 0.689 |
| Zfp760     | 0.004 | 0.756 | 2.232  | 2.988 | 2.214  | 2.223 | 2.260  | 2.864 | 3.112 | Rras2      | 0.688 |
| Camk2d     | 0.001 | 0.756 | 0.978  | 1.733 | 0.999  | 1.049 | 0.885  | 1.719 | 1.747 | Stk40      | 0.688 |
| Rras2      | 0.001 | 0.755 | 3.052  | 3.807 | 3.012  | 3.029 | 3.115  | 3.761 | 3.854 | Cacna1c    | 0.687 |
| Stk40      | 0.008 | 0.755 | 4.449  | 5.204 | 4.393  | 4.590 | 4.366  | 5.310 | 5.098 | Calb1      | 0.687 |
| Ccser2     | 0.003 | 0.753 | 3.611  | 4.364 | 3.504  | 3.697 | 3.631  | 4.316 | 4.411 | Itgav      | 0.686 |
| Pou2f1     | 0.010 | 0.753 | 1.938  | 2.691 | 1.879  | 1.924 | 2.011  | 2.534 | 2.847 | Camk2d     | 0.686 |
| Pias4      | 0.000 | 0.753 | 3.800  | 4.552 | 3.817  | 3.813 | 3.769  | 4.497 | 4.608 | Pias4      | 0.686 |
| Tnfrsf11b  | 0.005 | 0.753 | 6.177  | 6.929 | 6.067  | 6.250 | 6.212  | 7.018 | 6.841 | Tnfrsf11b  | 0.685 |
| Mib1       | 0.000 | 0.752 | 5.446  | 6.199 | 5.391  | 5.493 | 5.454  | 6.188 | 6.210 | Ptpn21     | 0.684 |
| Ptpn21     | 0.000 | 0.752 | 3.737  | 4.489 | 3.712  | 3.779 | 3.719  | 4.460 | 4.517 | Mib1       | 0.684 |
| Lsr        | 0.000 | 0.752 | 4.323  | 5.075 | 4.376  | 4.293 | 4.299  | 5.057 | 5.092 | Ccser2     | 0.684 |
| Cacna1c    | 0.005 | 0.751 | 2.977  | 3.729 | 2.936  | 3.063 | 2.933  | 3.844 | 3.613 | Lsr        | 0.684 |
| Card6      | 0.002 | 0.751 | 2.862  | 3.613 | 2.746  | 2.909 | 2.931  | 3.595 | 3.632 | Ssh3       | 0.683 |
| Elk3       | 0.004 | 0.751 | 4.117  | 4.868 | 4.007  | 4.096 | 4.248  | 4.855 | 4.881 | Magi3      | 0.681 |
| Pde4a      | 0.004 | 0.751 | 0.702  | 1.452 | 0.653  | 0.616 | 0.836  | 1.423 | 1.482 | Card6      | 0.681 |
| Magi3      | 0.001 | 0.749 | 0.816  | 1.565 | 0.765  | 0.817 | 0.865  | 1.512 | 1.619 | Tasor      | 0.681 |



|               |       |       |       |       |       |       |       |       |       |               |       |
|---------------|-------|-------|-------|-------|-------|-------|-------|-------|-------|---------------|-------|
| Plekhh3       | 0.003 | 0.749 | 3.711 | 4.460 | 3.804 | 3.657 | 3.671 | 4.528 | 4.391 | Plekhh3       | 0.680 |
| Ssh3          | 0.001 | 0.749 | 3.762 | 4.510 | 3.775 | 3.750 | 3.759 | 4.425 | 4.595 | Fubp3         | 0.680 |
| Fubp3         | 0.000 | 0.748 | 4.308 | 5.056 | 4.338 | 4.283 | 4.303 | 5.093 | 5.020 | Dusp16        | 0.680 |
| Syt1l         | 0.004 | 0.748 | 6.139 | 6.887 | 6.250 | 6.002 | 6.163 | 6.879 | 6.894 | Elk3          | 0.679 |
| Polr2a        | 0.001 | 0.748 | 6.106 | 6.854 | 6.044 | 6.167 | 6.107 | 6.836 | 6.871 | Sh3bp5        | 0.679 |
| Vasp          | 0.001 | 0.747 | 4.738 | 5.485 | 4.754 | 4.795 | 4.665 | 5.449 | 5.521 | Pde4a         | 0.679 |
| Tasor         | 0.004 | 0.747 | 3.083 | 3.830 | 3.044 | 3.171 | 3.033 | 3.728 | 3.931 | Polr2a        | 0.678 |
| Ppfibp1       | 0.000 | 0.747 | 4.419 | 5.166 | 4.363 | 4.460 | 4.435 | 5.149 | 5.183 | Vasp          | 0.678 |
| Gm38253       | 0.004 | 0.746 | 1.314 | 2.061 | 1.430 | 1.308 | 1.205 | 2.021 | 2.101 | Ppfibp1       | 0.678 |
| Pan3          | 0.002 | 0.746 | 3.144 | 3.890 | 3.076 | 3.262 | 3.093 | 3.882 | 3.898 | Usp27x        | 0.677 |
| Gipc1         | 0.001 | 0.746 | 4.747 | 5.493 | 4.721 | 4.843 | 4.678 | 5.517 | 5.470 | Gpsm1         | 0.677 |
| Usp27x        | 0.009 | 0.746 | 1.238 | 1.984 | 1.288 | 1.334 | 1.093 | 1.876 | 2.092 | Zdhhc8        | 0.676 |
| Tmem170       | 0.001 | 0.744 | 4.095 | 4.839 | 4.048 | 4.187 | 4.050 | 4.846 | 4.832 | Syt1l         | 0.676 |
| Zdhhc8        | 0.006 | 0.744 | 5.135 | 5.879 | 5.155 | 5.224 | 5.027 | 5.775 | 5.984 | Gipc1         | 0.675 |
| Dusp16        | 0.005 | 0.743 | 3.134 | 3.877 | 3.108 | 3.115 | 3.179 | 3.753 | 4.002 | Gm38253       | 0.675 |
| Cnnm3         | 0.007 | 0.743 | 3.318 | 4.061 | 3.294 | 3.456 | 3.203 | 3.984 | 4.138 | Gsto1         | 0.675 |
| Sh3bp5        | 0.008 | 0.743 | 2.093 | 2.836 | 2.111 | 2.006 | 2.163 | 2.703 | 2.969 | Pan3          | 0.675 |
| Dennd11       | 0.004 | 0.743 | 4.738 | 5.480 | 4.640 | 4.813 | 4.762 | 5.560 | 5.401 | Dennd11       | 0.674 |
| Gpsm1         | 0.006 | 0.742 | 5.692 | 6.433 | 5.772 | 5.646 | 5.657 | 6.559 | 6.308 | Tmem170       | 0.673 |
| Gm43681       | 0.006 | 0.742 | 1.055 | 1.796 | 0.911 | 1.164 | 1.090 | 1.861 | 1.732 | Cnnm3         | 0.672 |
| Faap100       | 0.007 | 0.742 | 2.895 | 3.637 | 3.040 | 2.874 | 2.771 | 3.566 | 3.708 | Plekhl1       | 0.672 |
| Usp42         | 0.007 | 0.741 | 2.954 | 3.695 | 2.938 | 2.813 | 3.112 | 3.710 | 3.681 | Shmt2         | 0.669 |
| Gsto1         | 0.005 | 0.740 | 4.042 | 4.781 | 3.979 | 4.051 | 4.094 | 4.905 | 4.658 | Gm43681       | 0.669 |
| Shmt2         | 0.002 | 0.739 | 4.439 | 5.179 | 4.384 | 4.414 | 4.521 | 5.235 | 5.123 | Faap100       | 0.669 |
| Plekhl1       | 0.005 | 0.739 | 4.434 | 5.173 | 4.484 | 4.474 | 4.344 | 5.068 | 5.278 | Rgs11         | 0.669 |
| Rnps1-ps      | 0.005 | 0.739 | 3.711 | 4.450 | 3.608 | 3.822 | 3.703 | 4.530 | 4.369 | Mpp2          | 0.669 |
| Tmbim1        | 0.000 | 0.738 | 2.928 | 3.667 | 2.937 | 2.972 | 2.876 | 3.648 | 3.685 | Rnps1-ps      | 0.668 |
| Klf16         | 0.000 | 0.738 | 3.381 | 4.119 | 3.400 | 3.384 | 3.359 | 4.135 | 4.103 | Marveld2      | 0.668 |
| Marveld2      | 0.000 | 0.738 | 3.392 | 4.130 | 3.398 | 3.375 | 3.403 | 4.099 | 4.161 | Klf16         | 0.668 |
| Zmiz1         | 0.004 | 0.738 | 4.153 | 4.891 | 4.126 | 4.265 | 4.068 | 4.827 | 4.955 | Tmbim1        | 0.668 |
| Rgs11         | 0.006 | 0.738 | 5.216 | 5.954 | 5.335 | 5.152 | 5.161 | 5.851 | 6.056 | Pkd1          | 0.668 |
| Pkd1          | 0.001 | 0.738 | 4.570 | 5.308 | 4.555 | 4.634 | 4.521 | 5.250 | 5.365 | Zmiz1         | 0.667 |
| Cep170b       | 0.002 | 0.737 | 5.936 | 6.674 | 5.894 | 6.039 | 5.876 | 6.709 | 6.638 | Morc3         | 0.666 |
| Ghr           | 0.006 | 0.736 | 5.563 | 6.299 | 5.462 | 5.704 | 5.523 | 6.364 | 6.235 | 9930017N22Rik | 0.666 |
| Ctr9          | 0.007 | 0.736 | 3.871 | 4.607 | 3.774 | 4.042 | 3.797 | 4.598 | 4.617 | Usp42         | 0.666 |
| Mpp2          | 0.002 | 0.736 | 2.984 | 3.720 | 3.025 | 2.972 | 2.954 | 3.810 | 3.629 | Cep170b       | 0.665 |
| Nktr          | 0.001 | 0.735 | 5.097 | 5.832 | 5.082 | 5.058 | 5.149 | 5.870 | 5.793 | Nktr          | 0.664 |
| Stk24         | 0.000 | 0.735 | 4.415 | 5.150 | 4.387 | 4.444 | 4.413 | 5.145 | 5.154 | Stk24         | 0.664 |
| Stk36         | 0.000 | 0.734 | 2.528 | 3.263 | 2.535 | 2.564 | 2.486 | 3.228 | 3.297 | Stk36         | 0.663 |
| Ppfia1        | 0.001 | 0.734 | 3.949 | 4.682 | 3.899 | 4.030 | 3.916 | 4.714 | 4.651 | Ghr           | 0.663 |
| Enho          | 0.000 | 0.733 | 7.195 | 7.929 | 7.215 | 7.220 | 7.151 | 7.892 | 7.966 | Enho          | 0.663 |
| Vwa5a         | 0.002 | 0.733 | 5.150 | 5.883 | 5.066 | 5.222 | 5.162 | 5.927 | 5.840 | Usp25         | 0.662 |
| Chd5          | 0.001 | 0.733 | 2.125 | 2.858 | 2.195 | 2.134 | 2.046 | 2.850 | 2.866 | Rgl3          | 0.662 |
| Rgl3          | 0.001 | 0.733 | 4.403 | 5.135 | 4.448 | 4.418 | 4.342 | 5.093 | 5.178 | Ppfia1        | 0.662 |
| Bahd1         | 0.003 | 0.733 | 4.093 | 4.826 | 4.056 | 4.221 | 4.004 | 4.842 | 4.810 | Dnmbp         | 0.662 |
| Dnmbp         | 0.001 | 0.733 | 2.505 | 3.237 | 2.522 | 2.549 | 2.443 | 3.284 | 3.191 | Vwa5a         | 0.662 |
| Acox1         | 0.006 | 0.732 | 5.801 | 6.533 | 5.724 | 5.952 | 5.728 | 6.582 | 6.485 | Mtcl1         | 0.661 |
| Zfp61         | 0.007 | 0.732 | 3.569 | 4.301 | 3.681 | 3.401 | 3.625 | 4.298 | 4.304 | Chd5          | 0.661 |
| Usp25         | 0.001 | 0.732 | 2.839 | 3.571 | 2.794 | 2.884 | 2.839 | 3.644 | 3.498 | Inha          | 0.661 |
| Slc26a2       | 0.005 | 0.732 | 2.431 | 3.163 | 2.315 | 2.404 | 2.575 | 3.192 | 3.134 | Gpatch1       | 0.660 |
| Sh3d21        | 0.000 | 0.732 | 3.256 | 3.988 | 3.220 | 3.264 | 3.283 | 4.001 | 3.974 | Gm15927       | 0.660 |
| A930005H10Rik | 0.005 | 0.731 | 1.797 | 2.528 | 1.767 | 1.912 | 1.711 | 2.613 | 2.443 | Sh3d21        | 0.660 |
| Gatad2a       | 0.001 | 0.731 | 4.652 | 5.383 | 4.710 | 4.644 | 4.602 | 5.343 | 5.424 | A930005H10Rik | 0.660 |
| Inha          | 0.001 | 0.731 | 5.990 | 6.720 | 6.036 | 5.994 | 5.939 | 6.654 | 6.787 | Ctr9          | 0.660 |
| 9930017N22Rik | 0.006 | 0.730 | 0.600 | 1.330 | 0.556 | 0.633 | 0.609 | 1.464 | 1.195 | Gatad2a       | 0.660 |
| Morc3         | 0.007 | 0.730 | 3.915 | 4.645 | 3.885 | 3.910 | 3.950 | 4.503 | 4.787 | Eif2ak3       | 0.660 |
| Arnt          | 0.000 | 0.730 | 4.087 | 4.817 | 4.129 | 4.050 | 4.083 | 4.792 | 4.842 | Polr1b        | 0.659 |
| Zdhhc13       | 0.005 | 0.730 | 4.050 | 4.779 | 4.040 | 4.183 | 3.927 | 4.749 | 4.810 | Bahd1         | 0.659 |
| Cdc42bpb      | 0.002 | 0.730 | 4.448 | 5.177 | 4.453 | 4.530 | 4.361 | 5.139 | 5.216 | Arnt          | 0.658 |
| Rnf44         | 0.003 | 0.729 | 5.201 | 5.930 | 5.183 | 5.297 | 5.123 | 5.865 | 5.996 | Acox1         | 0.657 |
| Eif2ak3       | 0.001 | 0.729 | 4.721 | 5.450 | 4.712 | 4.724 | 4.728 | 5.526 | 5.375 | Rnf44         | 0.657 |
| R3hdm4        | 0.001 | 0.729 | 4.241 | 4.970 | 4.314 | 4.215 | 4.195 | 4.940 | 5.000 | Cdc42bpb      | 0.657 |
| Ppl           | 0.009 | 0.728 | 2.732 | 3.460 | 2.667 | 2.906 | 2.621 | 3.404 | 3.516 | R3hdm4        | 0.656 |
| Gm15927       | 0.003 | 0.728 | 1.709 | 2.437 | 1.754 | 1.688 | 1.684 | 2.335 | 2.539 | Slc26a2       | 0.656 |
| Gpatch1       | 0.002 | 0.728 | 3.506 | 4.234 | 3.497 | 3.523 | 3.499 | 4.133 | 4.335 | Sp2           | 0.655 |
| Sp2           | 0.002 | 0.726 | 3.286 | 4.012 | 3.219 | 3.314 | 3.325 | 3.943 | 4.082 | Zfp61         | 0.655 |

|                |       |        |        |       |        |        |        |       |       |               |        |
|----------------|-------|--------|--------|-------|--------|--------|--------|-------|-------|---------------|--------|
| Agtrap         | 0.002 | 0.726  | 4.527  | 5.253 | 4.466  | 4.637  | 4.476  | 5.225 | 5.280 | Zdhhc13       | 0.654  |
| Yod1           | 0.001 | 0.725  | 2.613  | 3.339 | 2.590  | 2.577  | 2.673  | 3.390 | 3.288 | Ddx21         | 0.654  |
| Mtcl1          | 0.009 | 0.725  | 4.647  | 5.372 | 4.680  | 4.678  | 4.582  | 5.222 | 5.521 | Cdc42bpg      | 0.654  |
| Ahcy           | 0.001 | 0.724  | 2.329  | 3.053 | 2.407  | 2.276  | 2.305  | 3.025 | 3.082 | Yod1          | 0.654  |
| Trio           | 0.005 | 0.724  | 3.451  | 4.175 | 3.320  | 3.532  | 3.501  | 4.243 | 4.107 | Src           | 0.653  |
| Cdc42bpg       | 0.003 | 0.723  | 5.282  | 6.005 | 5.291  | 5.329  | 5.225  | 5.913 | 6.097 | Agtrap        | 0.652  |
| Kdm5c          | 0.000 | 0.723  | 5.384  | 6.107 | 5.351  | 5.421  | 5.381  | 6.122 | 6.092 | Ppl           | 0.652  |
| Polr1b         | 0.009 | 0.723  | 2.650  | 3.373 | 2.598  | 2.689  | 2.664  | 3.528 | 3.218 | Ahcy          | 0.651  |
| Ddx21          | 0.002 | 0.723  | 4.492  | 5.215 | 4.489  | 4.495  | 4.493  | 5.314 | 5.116 | Kdm5c         | 0.650  |
| Bhlhe41        | 0.010 | 0.722  | 3.741  | 4.464 | 3.749  | 3.885  | 3.590  | 4.395 | 4.532 | Trio          | 0.650  |
| Src            | 0.004 | 0.722  | 4.719  | 5.441 | 4.691  | 4.783  | 4.681  | 5.333 | 5.548 | Usp36         | 0.649  |
| Rfx2           | 0.000 | 0.722  | 2.416  | 3.138 | 2.373  | 2.431  | 2.446  | 3.132 | 3.144 | Rtl5          | 0.649  |
| CAAA01118383.1 | 0.002 | 0.721  | 4.143  | 4.864 | 4.232  | 4.136  | 4.061  | 4.878 | 4.850 | Rfx2          | 0.649  |
| Rtl5           | 0.001 | 0.721  | 5.134  | 5.855 | 5.140  | 5.165  | 5.098  | 5.797 | 5.913 | Prpf39        | 0.648  |
| Ifnar1         | 0.001 | 0.720  | 3.810  | 4.530 | 3.819  | 3.874  | 3.736  | 4.535 | 4.524 | Tbc1d24       | 0.647  |
| Prpf39         | 0.000 | 0.720  | 3.771  | 4.491 | 3.780  | 3.783  | 3.750  | 4.436 | 4.545 | Mtmr10        | 0.647  |
| Tbc1d24        | 0.004 | 0.719  | 3.311  | 4.030 | 3.251  | 3.396  | 3.287  | 3.941 | 4.119 | Mafk          | 0.647  |
| Gng5           | 0.004 | 0.718  | 4.469  | 5.187 | 4.499  | 4.563  | 4.345  | 5.234 | 5.139 | CAAA01118383. | 0.646  |
| Mafk           | 0.002 | 0.718  | 4.367  | 5.085 | 4.411  | 4.320  | 4.369  | 5.161 | 5.009 | Ifnar1        | 0.646  |
| Ifrd2          | 0.001 | 0.717  | 3.314  | 4.031 | 3.379  | 3.252  | 3.310  | 4.067 | 3.995 | Bhlhe41       | 0.646  |
| Usp36          | 0.007 | 0.717  | 4.087  | 4.805 | 4.151  | 4.087  | 4.025  | 4.932 | 4.677 | Nol3          | 0.646  |
| Aldh6a1        | 0.001 | 0.717  | 3.437  | 4.154 | 3.480  | 3.453  | 3.377  | 4.106 | 4.201 | Vps37a        | 0.646  |
| Vps37a         | 0.001 | 0.717  | 5.842  | 6.559 | 5.842  | 5.876  | 5.806  | 6.485 | 6.632 | Aldh6a1       | 0.644  |
| Nol3           | 0.002 | 0.716  | 3.070  | 3.787 | 3.043  | 3.086  | 3.082  | 3.699 | 3.874 | Ldlrad4       | 0.644  |
| Ripor1         | 0.001 | 0.716  | 4.400  | 5.116 | 4.469  | 4.360  | 4.371  | 5.100 | 5.132 | Ifrd2         | 0.643  |
| Apba3          | 0.000 | 0.715  | 3.762  | 4.477 | 3.800  | 3.746  | 3.740  | 4.511 | 4.443 | Gng5          | 0.643  |
| Fam122a        | 0.000 | 0.715  | 6.715  | 7.430 | 6.725  | 6.758  | 6.662  | 7.456 | 7.404 | Apba3         | 0.642  |
| Chd1l          | 0.000 | 0.715  | 3.189  | 3.904 | 3.161  | 3.226  | 3.178  | 3.921 | 3.886 | Ripor1        | 0.641  |
| Mtmr10         | 0.006 | 0.715  | 3.545  | 4.260 | 3.485  | 3.546  | 3.604  | 4.133 | 4.387 | Chd1l         | 0.641  |
| Ldlrad4        | 0.004 | 0.715  | 1.979  | 2.694 | 1.928  | 1.950  | 2.060  | 2.790 | 2.599 | Fam122a       | 0.641  |
| Gabpb1         | 0.006 | 0.715  | 2.378  | 3.093 | 2.415  | 2.478  | 2.241  | 3.030 | 3.156 | Tnfaip1       | 0.640  |
| Gm12592        | 0.005 | 0.714  | -0.253 | 0.462 | -0.116 | -0.337 | -0.305 | 0.404 | 0.519 | Gabpb1        | 0.639  |
| Tnfaip1        | 0.001 | 0.712  | 4.903  | 5.616 | 4.877  | 4.924  | 4.909  | 5.682 | 5.550 | Nkx2-2        | 0.639  |
| Upf1           | 0.000 | 0.712  | 4.864  | 5.576 | 4.847  | 4.859  | 4.886  | 5.599 | 5.553 | Upf1          | 0.638  |
| Gm6598         | 0.007 | 0.712  | 0.457  | 1.169 | 0.333  | 0.424  | 0.614  | 1.182 | 1.156 | Gm12592       | 0.638  |
| Nkx2-2         | 0.003 | 0.710  | 6.766  | 7.477 | 6.787  | 6.818  | 6.694  | 7.385 | 7.568 | Gm13031       | 0.636  |
| Rassf7         | 0.003 | 0.709  | 3.860  | 4.569 | 3.952  | 3.828  | 3.801  | 4.639 | 4.499 | Rassf7        | 0.635  |
| Gm13031        | 0.003 | 0.708  | 1.600  | 2.309 | 1.648  | 1.615  | 1.539  | 2.403 | 2.214 | Btbd1         | 0.634  |
| Btbd1          | 0.003 | 0.708  | 4.150  | 4.858 | 4.063  | 4.185  | 4.202  | 4.784 | 4.931 | Gm6598        | 0.633  |
| Pkn1           | 0.002 | 0.707  | 3.395  | 4.102 | 3.375  | 3.468  | 3.343  | 4.033 | 4.171 | Pkn1          | 0.633  |
| Nrm            | 0.001 | -0.710 | 1.998  | 1.288 | 2.024  | 1.949  | 2.022  | 1.336 | 1.240 | Nrm           | -0.389 |
| Pfkm           | 0.002 | -0.715 | 5.791  | 5.076 | 5.741  | 5.809  | 5.824  | 5.001 | 5.151 | Pfkm          | -0.390 |
| Gm4366         | 0.008 | -0.722 | 4.474  | 3.752 | 4.332  | 4.624  | 4.467  | 3.796 | 3.708 | Gm4366        | -0.396 |
| Rsph3a         | 0.006 | -0.730 | 2.790  | 2.060 | 2.821  | 2.902  | 2.648  | 2.123 | 1.998 | Rsph3a        | -0.398 |
| Cerk           | 0.007 | -0.737 | 6.071  | 5.334 | 5.980  | 6.232  | 6.000  | 5.384 | 5.283 | Cerk          | -0.402 |
| Camkk1         | 0.007 | -0.741 | 2.546  | 1.805 | 2.653  | 2.387  | 2.597  | 1.861 | 1.749 | Camkk1        | -0.403 |
| Dnm3           | 0.001 | -0.742 | 2.404  | 1.661 | 2.316  | 2.488  | 2.407  | 1.667 | 1.656 | Dnm3          | -0.403 |
| Gm11868        | 0.008 | -0.743 | 2.684  | 1.941 | 2.555  | 2.668  | 2.828  | 1.863 | 2.019 | Gm11868       | -0.403 |
| Hspa8          | 0.002 | -0.749 | 8.867  | 8.119 | 8.801  | 8.896  | 8.905  | 8.037 | 8.201 | Hspa8         | -0.404 |
| Chst11         | 0.006 | -0.750 | 6.667  | 5.917 | 6.567  | 6.763  | 6.672  | 6.025 | 5.809 | Chst11        | -0.405 |
| Maob           | 0.004 | -0.753 | 7.973  | 7.220 | 7.965  | 8.091  | 7.865  | 7.273 | 7.167 | Tm6sf2        | -0.406 |
| Tm6sf2         | 0.004 | -0.755 | 2.052  | 1.297 | 2.134  | 2.010  | 2.011  | 1.403 | 1.192 | Rab3a         | -0.407 |
| Rab3a          | 0.003 | -0.757 | 7.566  | 6.809 | 7.544  | 7.620  | 7.535  | 6.910 | 6.709 | Gspt2         | -0.408 |
| Gm29791        | 0.002 | -0.757 | 1.267  | 0.510 | 1.255  | 1.172  | 1.374  | 0.475 | 0.545 | Maob          | -0.408 |
| Slc18a1        | 0.001 | -0.757 | 3.973  | 3.216 | 3.923  | 4.006  | 3.991  | 3.262 | 3.171 | Slc18a1       | -0.408 |
| Trim37         | 0.003 | -0.759 | 5.119  | 4.360 | 5.107  | 5.218  | 5.031  | 4.414 | 4.306 | Nap1l3        | -0.409 |
| Gspt2          | 0.003 | -0.759 | 3.946  | 3.186 | 3.946  | 3.912  | 3.980  | 3.074 | 3.299 | Gm29791       | -0.409 |
| Btbd8          | 0.001 | -0.760 | 3.100  | 2.340 | 3.119  | 3.023  | 3.158  | 2.292 | 2.387 | Trim37        | -0.409 |
| Nefh           | 0.000 | -0.762 | 5.019  | 4.257 | 5.027  | 4.968  | 5.061  | 4.248 | 4.266 | Btbd8         | -0.410 |
| Pdzk1ip1       | 0.001 | -0.763 | 5.131  | 4.368 | 5.078  | 5.152  | 5.163  | 4.315 | 4.421 | Pcdhga11      | -0.410 |
| Nap1l3         | 0.010 | -0.768 | 3.263  | 2.496 | 3.203  | 3.291  | 3.296  | 2.328 | 2.663 | Nefh          | -0.410 |
| Pcdhga11       | 0.010 | -0.770 | 1.631  | 0.862 | 1.578  | 1.633  | 1.684  | 1.029 | 0.694 | Pdzk1ip1      | -0.411 |
| Gm27000        | 0.000 | -0.773 | 1.169  | 0.396 | 1.197  | 1.134  | 1.177  | 0.408 | 0.385 | Gm27000       | -0.415 |
| Akr1b3         | 0.001 | -0.776 | 3.850  | 3.074 | 3.838  | 3.901  | 3.812  | 3.121 | 3.027 | Akr1b3        | -0.416 |
| Smim20         | 0.002 | -0.784 | 4.865  | 4.081 | 4.966  | 4.856  | 4.772  | 4.060 | 4.102 | Hmgn2         | -0.419 |
| Hsp90aa1       | 0.000 | -0.790 | 8.326  | 7.536 | 8.256  | 8.339  | 8.382  | 7.541 | 7.531 | Smim20        | -0.420 |

|               |       |        |        |        |        |        |        |        |        |               |        |
|---------------|-------|--------|--------|--------|--------|--------|--------|--------|--------|---------------|--------|
| Hmgn2         | 0.007 | -0.791 | 6.327  | 5.537  | 6.326  | 6.375  | 6.280  | 5.384  | 5.689  | Oat           | -0.421 |
| Wdr12         | 0.001 | -0.795 | 2.993  | 2.197  | 2.929  | 3.009  | 3.040  | 2.233  | 2.161  | Hsp90aa1      | -0.422 |
| Tnfrsf23      | 0.005 | -0.796 | 3.787  | 2.990  | 3.758  | 3.656  | 3.946  | 3.000  | 2.981  | Wdr12         | -0.424 |
| Rtl8b         | 0.002 | -0.796 | 5.243  | 4.447  | 5.345  | 5.165  | 5.219  | 4.394  | 4.500  | Ap2m1         | -0.424 |
| Oat           | 0.007 | -0.797 | 5.811  | 5.014  | 5.807  | 5.773  | 5.854  | 5.171  | 4.858  | Rtl8b         | -0.425 |
| Ap2m1         | 0.000 | -0.797 | 6.919  | 6.122  | 6.923  | 6.945  | 6.890  | 6.103  | 6.141  | Tnfrsf23      | -0.426 |
| Il17re        | 0.002 | -0.801 | 2.324  | 1.523  | 2.236  | 2.291  | 2.444  | 1.489  | 1.556  | Phactr1       | -0.427 |
| Phactr1       | 0.001 | -0.804 | 6.045  | 5.241  | 6.011  | 6.106  | 6.019  | 5.317  | 5.165  | Il17re        | -0.427 |
| Gm43597       | 0.002 | -0.808 | 1.425  | 0.618  | 1.499  | 1.297  | 1.480  | 0.596  | 0.640  | Gm43597       | -0.430 |
| Resp18        | 0.000 | -0.813 | 10.222 | 9.409  | 10.210 | 10.258 | 10.199 | 9.404  | 9.414  | Resp18        | -0.431 |
| Dock3         | 0.003 | -0.816 | 1.247  | 0.431  | 1.337  | 1.184  | 1.219  | 0.346  | 0.516  | Dock3         | -0.431 |
| Gm44850       | 0.001 | -0.817 | 8.442  | 7.624  | 8.416  | 8.441  | 8.468  | 7.560  | 7.689  | Gm44850       | -0.432 |
| Pms1          | 0.004 | -0.818 | 2.054  | 1.236  | 2.015  | 1.953  | 2.194  | 1.175  | 1.296  | Pms1          | -0.434 |
| BC037032      | 0.003 | -0.820 | 0.876  | 0.056  | 0.849  | 0.774  | 1.005  | 0.108  | 0.004  | BC037032      | -0.434 |
| Cox7b         | 0.002 | -0.822 | 7.562  | 6.741  | 7.541  | 7.660  | 7.486  | 6.796  | 6.685  | Cox7b         | -0.434 |
| Mat1a         | 0.000 | -0.831 | 7.012  | 6.181  | 6.978  | 6.992  | 7.067  | 6.202  | 6.160  | Mat1a         | -0.438 |
| Cox6a2        | 0.001 | -0.833 | 9.441  | 8.609  | 9.540  | 9.422  | 9.362  | 8.586  | 8.632  | Cox6a2        | -0.439 |
| Smim1         | 0.004 | -0.839 | 4.749  | 3.910  | 4.700  | 4.853  | 4.693  | 4.020  | 3.799  | Smim1         | -0.440 |
| Atox1         | 0.002 | -0.841 | 6.297  | 5.457  | 6.277  | 6.291  | 6.324  | 5.562  | 5.352  | Atox1         | -0.440 |
| Gmpr          | 0.008 | -0.841 | 6.354  | 5.512  | 6.349  | 6.505  | 6.207  | 5.610  | 5.415  | Gmpr          | -0.443 |
| Rnft2         | 0.002 | -0.843 | 2.620  | 1.778  | 2.684  | 2.669  | 2.508  | 1.810  | 1.745  | Rnft2         | -0.443 |
| Tor4a         | 0.002 | -0.851 | 4.925  | 4.075  | 4.815  | 5.019  | 4.941  | 4.027  | 4.122  | Tor4a         | -0.446 |
| Crispld2      | 0.005 | -0.851 | 5.660  | 4.809  | 5.598  | 5.556  | 5.826  | 4.853  | 4.766  | Pard3         | -0.447 |
| Xlr3a         | 0.007 | -0.856 | 3.984  | 3.128  | 3.792  | 4.029  | 4.130  | 3.115  | 3.141  | Crispld2      | -0.447 |
| Aldh5a1       | 0.001 | -0.857 | 5.082  | 4.225  | 5.039  | 5.044  | 5.165  | 4.212  | 4.238  | Aldh5a1       | -0.448 |
| Pard3         | 0.006 | -0.858 | 4.068  | 3.211  | 4.049  | 4.187  | 3.970  | 3.086  | 3.335  | Smc4          | -0.449 |
| Smc4          | 0.007 | -0.858 | 3.934  | 3.076  | 3.934  | 3.786  | 4.081  | 3.160  | 2.992  | Xlr3a         | -0.450 |
| Zfp459        | 0.003 | -0.865 | 0.589  | -0.276 | 0.644  | 0.654  | 0.468  | -0.192 | -0.360 | Zfp459        | -0.451 |
| Ralgps2       | 0.009 | -0.867 | 2.481  | 1.615  | 2.264  | 2.558  | 2.623  | 1.652  | 1.577  | Mkks          | -0.453 |
| Fam131a       | 0.001 | -0.874 | 5.194  | 4.320  | 5.241  | 5.093  | 5.247  | 4.298  | 4.341  | Ralgps2       | -0.455 |
| Mkks          | 0.004 | -0.874 | 2.997  | 2.123  | 2.940  | 3.051  | 3.000  | 2.251  | 1.995  | Fam131a       | -0.455 |
| Spock2        | 0.007 | -0.876 | 8.783  | 7.907  | 8.721  | 8.971  | 8.658  | 7.856  | 7.959  | Slc41a2       | -0.457 |
| Slc41a2       | 0.007 | -0.878 | 4.151  | 3.273  | 3.978  | 4.266  | 4.208  | 3.177  | 3.368  | Spock2        | -0.457 |
| Rgs17         | 0.008 | -0.881 | 2.473  | 1.591  | 2.377  | 2.665  | 2.377  | 1.499  | 1.684  | Rgs17         | -0.458 |
| Cdkn2c        | 0.000 | -0.888 | 4.260  | 3.372  | 4.237  | 4.274  | 4.269  | 3.403  | 3.340  | Cdkn2c        | -0.460 |
| Lrrc24        | 0.004 | -0.889 | 3.978  | 3.089  | 3.875  | 4.091  | 3.968  | 3.181  | 2.998  | Lrrc24        | -0.460 |
| Cdc7          | 0.002 | -0.892 | 1.600  | 0.709  | 1.611  | 1.525  | 1.666  | 0.809  | 0.608  | Cdc7          | -0.460 |
| Nrxn1         | 0.005 | -0.893 | 2.202  | 1.309  | 2.169  | 2.359  | 2.077  | 1.237  | 1.380  | Tspan7        | -0.462 |
| Amer2         | 0.001 | -0.893 | 2.866  | 1.973  | 2.947  | 2.775  | 2.875  | 2.008  | 1.938  | Amer2         | -0.462 |
| Tspan7        | 0.000 | -0.894 | 7.134  | 6.240  | 7.169  | 7.080  | 7.153  | 6.190  | 6.290  | Scn3b         | -0.462 |
| Shisal2b      | 0.000 | -0.897 | 5.217  | 4.320  | 5.158  | 5.263  | 5.230  | 4.279  | 4.360  | Them6         | -0.462 |
| Scn3b         | 0.006 | -0.897 | 2.277  | 1.380  | 2.167  | 2.396  | 2.268  | 1.250  | 1.510  | Nrxn1         | -0.463 |
| Them6         | 0.002 | -0.898 | 4.151  | 3.253  | 4.169  | 4.208  | 4.077  | 3.352  | 3.154  | Shisal2b      | -0.463 |
| Tceal3        | 0.000 | -0.900 | 4.899  | 3.999  | 4.871  | 4.938  | 4.889  | 4.034  | 3.964  | Tceal3        | -0.464 |
| Ntrk2         | 0.003 | -0.907 | 5.557  | 4.650  | 5.471  | 5.682  | 5.517  | 4.583  | 4.717  | Ntrk2         | -0.467 |
| Mpv17l        | 0.003 | -0.913 | 2.465  | 1.552  | 2.474  | 2.602  | 2.317  | 1.534  | 1.569  | Spc24         | -0.467 |
| Spc24         | 0.009 | -0.914 | 2.178  | 1.264  | 2.149  | 2.073  | 2.313  | 1.100  | 1.428  | Ccdc30        | -0.468 |
| Apbb1         | 0.001 | -0.918 | 5.710  | 4.791  | 5.677  | 5.730  | 5.721  | 4.863  | 4.719  | Apbb1         | -0.470 |
| Ccdc30        | 0.005 | -0.920 | 1.444  | 0.524  | 1.450  | 1.440  | 1.441  | 0.356  | 0.692  | Mpv17l        | -0.470 |
| Pkmyt1        | 0.003 | -0.925 | 2.633  | 1.708  | 2.683  | 2.473  | 2.744  | 1.712  | 1.704  | Gdap2         | -0.472 |
| Mpst          | 0.002 | -0.927 | 3.921  | 2.994  | 3.820  | 4.052  | 3.892  | 2.979  | 3.010  | Pkmyt1        | -0.475 |
| Plcb4         | 0.002 | -0.928 | 3.703  | 2.775  | 3.576  | 3.824  | 3.709  | 2.763  | 2.788  | Mpst          | -0.475 |
| Zcchc18       | 0.000 | -0.931 | 5.690  | 4.759  | 5.753  | 5.657  | 5.659  | 4.770  | 4.748  | Plcb4         | -0.476 |
| Gdap2         | 0.008 | -0.931 | 7.238  | 6.307  | 7.258  | 7.149  | 7.309  | 6.487  | 6.127  | Zcchc18       | -0.476 |
| Gpx1          | 0.002 | -0.943 | 7.848  | 6.905  | 7.806  | 7.970  | 7.768  | 6.982  | 6.827  | Gpr19         | -0.478 |
| Gpr19         | 0.007 | -0.945 | 3.784  | 2.838  | 3.746  | 3.898  | 3.706  | 2.680  | 2.997  | Gpx1          | -0.480 |
| Mapk10        | 0.003 | -0.949 | 4.247  | 3.298  | 4.192  | 4.369  | 4.180  | 3.382  | 3.215  | Mapk10        | -0.482 |
| Gm6206        | 0.004 | -0.950 | 0.426  | -0.525 | 0.369  | 0.594  | 0.314  | -0.585 | -0.464 | Tgfbr3        | -0.482 |
| Rtl8c         | 0.001 | -0.951 | 7.760  | 6.809  | 7.772  | 7.667  | 7.841  | 6.842  | 6.777  | Rtl8c         | -0.483 |
| Tgfbr3        | 0.006 | -0.952 | 1.631  | 0.679  | 1.598  | 1.763  | 1.533  | 0.547  | 0.812  | Gm6206        | -0.484 |
| Kif20a        | 0.009 | -0.955 | 2.255  | 1.300  | 2.244  | 2.055  | 2.466  | 1.252  | 1.349  | Hmga1         | -0.485 |
| Hmga1         | 0.000 | -0.959 | 3.619  | 2.661  | 3.607  | 3.662  | 3.589  | 2.634  | 2.687  | Zfp882        | -0.486 |
| Zfp882        | 0.008 | -0.962 | 3.295  | 2.333  | 3.206  | 3.211  | 3.468  | 2.194  | 2.471  | Kif20a        | -0.487 |
| 2310058D17Rik | 0.000 | -0.964 | 0.988  | 0.024  | 0.964  | 1.003  | 0.998  | 0.005  | 0.043  | 2310058D17Rik | -0.488 |
| Prss53        | 0.001 | -0.981 | 7.643  | 6.662  | 7.580  | 7.757  | 7.593  | 6.695  | 6.629  | Prss53        | -0.494 |
| Clmp          | 0.006 | -0.982 | 0.429  | -0.553 | 0.521  | 0.212  | 0.553  | -0.580 | -0.526 | Clmp          | -0.496 |

|               |       |        |       |        |       |       |       |        |        |               |        |
|---------------|-------|--------|-------|--------|-------|-------|-------|--------|--------|---------------|--------|
| Smc2          | 0.002 | -0.987 | 2.483 | 1.497  | 2.501 | 2.359 | 2.590 | 1.468  | 1.526  | Smc2          | -0.496 |
| Gm50039       | 0.005 | -0.993 | 1.565 | 0.572  | 1.742 | 1.560 | 1.395 | 0.537  | 0.607  | Dner          | -0.498 |
| Ncam1         | 0.003 | -0.997 | 3.275 | 2.277  | 3.250 | 3.387 | 3.186 | 2.174  | 2.381  | Ncam1         | -0.499 |
| Dner          | 0.005 | -0.999 | 3.486 | 2.487  | 3.383 | 3.613 | 3.461 | 2.348  | 2.625  | Gm50039       | -0.500 |
| Nup93         | 0.001 | -1.008 | 5.800 | 4.792  | 5.690 | 5.844 | 5.865 | 4.822  | 4.761  | Nup93         | -0.503 |
| Plek          | 0.009 | -1.015 | 1.571 | 0.556  | 1.471 | 1.503 | 1.740 | 0.387  | 0.726  | Plek          | -0.503 |
| Myrf          | 0.006 | -1.015 | 1.810 | 0.795  | 1.956 | 1.858 | 1.617 | 0.698  | 0.892  | Myrf          | -0.507 |
| Zwilch        | 0.006 | -1.016 | 0.996 | -0.020 | 1.094 | 0.773 | 1.122 | 0.015  | -0.055 | Arhgef9       | -0.507 |
| Gm20208       | 0.002 | -1.022 | 3.786 | 2.763  | 3.842 | 3.679 | 3.836 | 2.667  | 2.860  | Gm20208       | -0.507 |
| Gm16701       | 0.006 | -1.025 | 2.521 | 1.497  | 2.299 | 2.603 | 2.662 | 1.524  | 1.470  | Zwilch        | -0.508 |
| Nab1          | 0.001 | -1.028 | 3.704 | 2.676  | 3.597 | 3.771 | 3.743 | 2.709  | 2.643  | Nab1          | -0.510 |
| Fbxo36        | 0.007 | -1.028 | 3.186 | 2.158  | 3.366 | 3.180 | 3.012 | 2.057  | 2.259  | 4632428C04Rik | -0.511 |
| Arhgef9       | 0.005 | -1.029 | 3.302 | 2.272  | 3.266 | 3.375 | 3.264 | 2.106  | 2.439  | Fbxo36        | -0.511 |
| 4632428C04Rik | 0.001 | -1.032 | 3.114 | 2.083  | 3.021 | 3.152 | 3.171 | 2.147  | 2.019  | Gm16701       | -0.511 |
| Car10         | 0.000 | -1.035 | 4.322 | 3.287  | 4.308 | 4.369 | 4.289 | 3.319  | 3.255  | Car10         | -0.512 |
| Bcat1         | 0.008 | -1.038 | 4.195 | 3.157  | 4.106 | 4.033 | 4.447 | 3.185  | 3.129  | Lgi2          | -0.513 |
| Lgi2          | 0.003 | -1.041 | 2.878 | 1.837  | 2.810 | 2.994 | 2.830 | 1.715  | 1.960  | Tmem158       | -0.514 |
| Tmem158       | 0.002 | -1.044 | 1.840 | 0.795  | 1.772 | 1.880 | 1.868 | 0.669  | 0.922  | St3gal6       | -0.516 |
| Lig1          | 0.004 | -1.045 | 3.265 | 2.220  | 3.079 | 3.307 | 3.409 | 2.251  | 2.189  | Bcat1         | -0.517 |
| Gpr150        | 0.003 | -1.052 | 0.517 | -0.535 | 0.515 | 0.662 | 0.374 | -0.483 | -0.587 | Lig1          | -0.518 |
| Pianp         | 0.009 | -1.052 | 5.206 | 4.154  | 5.129 | 5.418 | 5.070 | 4.296  | 4.012  | Pianp         | -0.518 |
| Spin2c        | 0.002 | -1.058 | 1.111 | 0.053  | 1.181 | 1.039 | 1.112 | -0.054 | 0.160  | Rab9b         | -0.518 |
| St3gal6       | 0.009 | -1.058 | 2.184 | 1.126  | 2.059 | 2.208 | 2.284 | 1.328  | 0.924  | Spin2c        | -0.519 |
| Rab9b         | 0.004 | -1.065 | 2.642 | 1.577  | 2.653 | 2.628 | 2.645 | 1.396  | 1.759  | Gpr150        | -0.519 |
| Syt13         | 0.007 | -1.071 | 1.490 | 0.420  | 1.323 | 1.710 | 1.438 | 0.506  | 0.333  | Map1a         | -0.525 |
| Specc1        | 0.001 | -1.073 | 0.457 | -0.615 | 0.367 | 0.543 | 0.463 | -0.572 | -0.659 | Specc1        | -0.525 |
| Map1a         | 0.003 | -1.080 | 1.410 | 0.330  | 1.357 | 1.432 | 1.441 | 0.184  | 0.477  | Syt13         | -0.526 |
| Cspg5         | 0.000 | -1.085 | 2.243 | 1.158  | 2.248 | 2.234 | 2.247 | 1.117  | 1.200  | Cspg5         | -0.528 |
| Mpp3          | 0.001 | -1.093 | 2.668 | 1.575  | 2.700 | 2.634 | 2.669 | 1.697  | 1.452  | Mpp3          | -0.530 |
| Ndufs5        | 0.005 | -1.099 | 5.117 | 4.018  | 5.271 | 5.026 | 5.053 | 4.159  | 3.878  | Ndufs5        | -0.532 |
| Scnn1g        | 0.007 | -1.107 | 4.109 | 3.003  | 4.067 | 4.288 | 3.973 | 2.855  | 3.150  | Scnn1g        | -0.535 |
| Serp2         | 0.003 | -1.112 | 2.206 | 1.094  | 2.221 | 2.037 | 2.360 | 1.146  | 1.042  | Kcnf1         | -0.538 |
| Kcnf1         | 0.004 | -1.119 | 4.598 | 3.479  | 4.479 | 4.667 | 4.648 | 3.640  | 3.318  | Serp2         | -0.539 |
| Mllt11        | 0.001 | -1.120 | 4.853 | 3.734  | 4.815 | 4.961 | 4.785 | 3.803  | 3.664  | Mllt11        | -0.540 |
| Osbpl6        | 0.004 | -1.129 | 4.034 | 2.906  | 3.964 | 4.162 | 3.977 | 2.755  | 3.056  | Me1           | -0.540 |
| Me1           | 0.007 | -1.133 | 4.448 | 3.315  | 4.348 | 4.553 | 4.442 | 3.113  | 3.516  | Osbpl6        | -0.541 |
| Grem2         | 0.005 | -1.134 | 6.010 | 4.876  | 5.929 | 6.185 | 5.915 | 5.012  | 4.740  | Lpl           | -0.543 |
| Lpl           | 0.004 | -1.137 | 3.841 | 2.704  | 3.858 | 3.935 | 3.729 | 2.870  | 2.538  | Grem2         | -0.544 |
| Efhc2         | 0.001 | -1.140 | 2.845 | 1.705  | 2.776 | 2.899 | 2.860 | 1.627  | 1.784  | Chrm3         | -0.545 |
| 4933416I08Rik | 0.004 | -1.149 | 4.126 | 2.977  | 4.285 | 3.972 | 4.122 | 2.877  | 3.077  | Efhc2         | -0.546 |
| Melk          | 0.007 | -1.149 | 0.991 | -0.158 | 1.071 | 0.809 | 1.094 | 0.014  | -0.331 | Melk          | -0.548 |
| Il17rc        | 0.004 | -1.150 | 4.206 | 3.057  | 4.234 | 4.055 | 4.330 | 3.185  | 2.929  | Il17rc        | -0.549 |
| Skida1        | 0.001 | -1.151 | 1.315 | 0.164  | 1.219 | 1.434 | 1.291 | 0.199  | 0.129  | 4933416I08Rik | -0.550 |
| Pcdhgc4       | 0.002 | -1.155 | 1.916 | 0.761  | 1.752 | 2.023 | 1.973 | 0.773  | 0.748  | Skida1        | -0.550 |
| Chrm3         | 0.010 | -1.156 | 4.577 | 3.421  | 4.491 | 4.677 | 4.562 | 3.173  | 3.668  | Kcnk10        | -0.551 |
| Zfp367        | 0.006 | -1.156 | 3.212 | 2.056  | 3.128 | 3.067 | 3.442 | 1.973  | 2.139  | Tspyl3        | -0.552 |
| Tspyl3        | 0.001 | -1.157 | 1.785 | 0.628  | 1.872 | 1.787 | 1.696 | 0.585  | 0.671  | Pcdhgc4       | -0.552 |
| Shc4          | 0.002 | -1.163 | 0.888 | -0.275 | 0.848 | 0.749 | 1.068 | -0.272 | -0.278 | Zfp367        | -0.554 |
| Tdrd6         | 0.004 | -1.170 | 2.716 | 1.546  | 2.513 | 2.884 | 2.751 | 1.524  | 1.568  | Sntg2         | -0.554 |
| Kcnk10        | 0.007 | -1.171 | 1.165 | -0.006 | 1.108 | 1.191 | 1.197 | -0.232 | 0.221  | Gm47232       | -0.554 |
| Sntg2         | 0.002 | -1.172 | 1.790 | 0.618  | 1.792 | 1.750 | 1.828 | 0.765  | 0.471  | Mcm6          | -0.555 |
| Gm47232       | 0.008 | -1.178 | 2.582 | 1.404  | 2.478 | 2.545 | 2.721 | 1.615  | 1.192  | Shc4          | -0.555 |
| Mcm6          | 0.007 | -1.180 | 3.694 | 2.514  | 3.641 | 3.619 | 3.823 | 2.732  | 2.296  | Tdrd6         | -0.558 |
| Fhit          | 0.001 | -1.193 | 3.729 | 2.536  | 3.634 | 3.753 | 3.798 | 2.441  | 2.631  | Fhit          | -0.562 |
| Igsf1         | 0.001 | -1.198 | 5.302 | 4.103  | 5.220 | 5.418 | 5.267 | 4.014  | 4.192  | Igsf1         | -0.564 |
| Gng4          | 0.000 | -1.206 | 7.118 | 5.912  | 7.127 | 7.159 | 7.067 | 5.997  | 5.828  | Gng4          | -0.566 |
| Fah           | 0.001 | -1.209 | 4.265 | 3.056  | 4.214 | 4.280 | 4.301 | 3.165  | 2.946  | Fah           | -0.566 |
| Tmem71        | 0.002 | -1.213 | 3.988 | 2.775  | 3.843 | 3.978 | 4.144 | 2.814  | 2.735  | C3            | -0.567 |
| C3            | 0.006 | -1.213 | 3.163 | 1.950  | 3.080 | 3.084 | 3.326 | 1.769  | 2.132  | Tmem71        | -0.570 |
| Clba1         | 0.001 | -1.219 | 5.217 | 3.998  | 5.306 | 5.201 | 5.143 | 4.056  | 3.939  | Clba1         | -0.571 |
| Gm1673        | 0.000 | -1.221 | 3.973 | 2.752  | 4.011 | 3.991 | 3.917 | 2.717  | 2.787  | Gm1673        | -0.571 |
| Tubb2b        | 0.000 | -1.221 | 3.438 | 2.217  | 3.435 | 3.355 | 3.525 | 2.247  | 2.187  | Tubb2b        | -0.572 |
| Amph          | 0.002 | -1.236 | 4.625 | 3.389  | 4.510 | 4.751 | 4.615 | 3.512  | 3.266  | Cfap20dc      | -0.573 |
| Lrrc6         | 0.001 | -1.237 | 2.291 | 1.054  | 2.160 | 2.382 | 2.332 | 1.031  | 1.077  | Amph          | -0.575 |
| Cfap20dc      | 0.004 | -1.240 | 1.808 | 0.568  | 1.703 | 1.825 | 1.896 | 0.377  | 0.760  | Erich3        | -0.576 |
| Mad2l1        | 0.004 | -1.244 | 1.115 | -0.129 | 1.026 | 0.968 | 1.349 | -0.195 | -0.064 | D130043K22Rik | -0.577 |

|               |       |        |       |        |       |       |       |        |        |               |        |
|---------------|-------|--------|-------|--------|-------|-------|-------|--------|--------|---------------|--------|
| Erich3        | 0.002 | -1.244 | 4.665 | 3.421  | 4.626 | 4.706 | 4.663 | 3.569  | 3.272  | Lrrc6         | -0.577 |
| D130043K22Rik | 0.002 | -1.247 | 4.003 | 2.756  | 3.919 | 4.067 | 4.023 | 2.912  | 2.600  | Mad2l1        | -0.580 |
| 6330415G19Rik | 0.002 | -1.261 | 1.430 | 0.168  | 1.410 | 1.561 | 1.319 | 0.267  | 0.069  | Sybu          | -0.582 |
| Hells         | 0.002 | -1.268 | 1.492 | 0.224  | 1.370 | 1.417 | 1.689 | 0.205  | 0.242  | 6330415G19Rik | -0.583 |
| Meltf         | 0.001 | -1.269 | 1.482 | 0.212  | 1.377 | 1.542 | 1.527 | 0.282  | 0.143  | Ncapg2        | -0.583 |
| Sybu          | 0.005 | -1.272 | 1.701 | 0.429  | 1.707 | 1.600 | 1.796 | 0.214  | 0.644  | Meltf         | -0.585 |
| Ncapg2        | 0.006 | -1.274 | 1.918 | 0.645  | 1.854 | 1.830 | 2.070 | 0.439  | 0.850  | Hells         | -0.587 |
| Atp8a2        | 0.006 | -1.283 | 1.522 | 0.238  | 1.323 | 1.789 | 1.452 | 0.185  | 0.291  | Snrpn         | -0.589 |
| Mlf1          | 0.005 | -1.285 | 1.865 | 0.581  | 1.835 | 1.709 | 2.051 | 0.736  | 0.425  | Mlf1          | -0.589 |
| Noxred1       | 0.002 | -1.286 | 1.889 | 0.603  | 1.747 | 2.061 | 1.859 | 0.672  | 0.533  | Noxred1       | -0.591 |
| Snrpn         | 0.002 | -1.293 | 5.175 | 3.882  | 5.153 | 5.177 | 5.194 | 3.718  | 4.046  | Slc2a6        | -0.591 |
| B3galt5       | 0.002 | -1.293 | 5.435 | 4.142  | 5.309 | 5.587 | 5.410 | 4.208  | 4.077  | Neurl1a       | -0.592 |
| Slc2a6        | 0.004 | -1.295 | 3.254 | 1.959  | 3.292 | 3.096 | 3.374 | 2.120  | 1.797  | Atp8a2        | -0.593 |
| Neurl1a       | 0.001 | -1.296 | 2.522 | 1.225  | 2.597 | 2.513 | 2.456 | 1.096  | 1.355  | B3galt5       | -0.593 |
| Myrip         | 0.001 | -1.325 | 2.256 | 0.931  | 2.317 | 2.178 | 2.272 | 1.066  | 0.797  | Myrip         | -0.599 |
| 5330434G04Rik | 0.007 | -1.339 | 3.437 | 2.098  | 3.302 | 3.556 | 3.452 | 1.861  | 2.335  | 5330434G04Rik | -0.600 |
| Rps7-ps2      | 0.007 | -1.352 | 1.338 | -0.014 | 1.290 | 1.301 | 1.423 | -0.270 | 0.243  | Rps7-ps2      | -0.602 |
| C8b           | 0.002 | -1.353 | 3.581 | 2.228  | 3.545 | 3.628 | 3.572 | 2.397  | 2.059  | Fibin         | -0.605 |
| Mpc1-ps       | 0.001 | -1.356 | 4.182 | 2.827  | 4.046 | 4.339 | 4.162 | 2.847  | 2.806  | Gm10095       | -0.606 |
| Chil6         | 0.008 | -1.359 | 1.602 | 0.243  | 1.767 | 1.275 | 1.763 | 0.279  | 0.206  | C8b           | -0.606 |
| Fibin         | 0.008 | -1.361 | 2.536 | 1.175  | 2.422 | 2.668 | 2.518 | 0.910  | 1.441  | Mpc1-ps       | -0.611 |
| Gm10095       | 0.009 | -1.363 | 1.422 | 0.059  | 1.304 | 1.569 | 1.394 | -0.206 | 0.324  | Olfm1         | -0.612 |
| Olfm1         | 0.000 | -1.367 | 5.230 | 3.862  | 5.151 | 5.300 | 5.238 | 3.788  | 3.937  | Fam169a       | -0.612 |
| Hs3st6        | 0.000 | -1.368 | 5.528 | 4.160  | 5.523 | 5.483 | 5.577 | 4.110  | 4.209  | E2f1          | -0.612 |
| E2f1          | 0.001 | -1.372 | 5.309 | 3.938  | 5.225 | 5.366 | 5.336 | 4.065  | 3.810  | Hs3st6        | -0.612 |
| Fam169a       | 0.006 | -1.388 | 2.954 | 1.566  | 2.931 | 3.021 | 2.909 | 1.310  | 1.821  | Dach2         | -0.613 |
| St8sia3       | 0.005 | -1.392 | 2.313 | 0.920  | 2.188 | 2.351 | 2.399 | 0.698  | 1.143  | Chil6         | -0.615 |
| Ica1l         | 0.003 | -1.395 | 5.029 | 3.633  | 4.891 | 5.175 | 5.021 | 3.485  | 3.782  | St8sia3       | -0.615 |
| Dach2         | 0.007 | -1.396 | 1.596 | 0.200  | 1.542 | 1.671 | 1.577 | -0.077 | 0.478  | Rtkn2         | -0.616 |
| Jag2          | 0.001 | -1.404 | 5.066 | 3.661  | 5.099 | 5.130 | 4.969 | 3.532  | 3.791  | Ica1l         | -0.619 |
| Rtkn2         | 0.007 | -1.408 | 3.996 | 2.589  | 3.979 | 3.974 | 4.037 | 2.878  | 2.300  | Jag2          | -0.621 |
| Lgmn          | 0.000 | -1.408 | 6.134 | 4.726  | 6.114 | 6.195 | 6.093 | 4.658  | 4.795  | Lgmn          | -0.623 |
| AY036118      | 0.001 | -1.414 | 9.558 | 8.143  | 9.607 | 9.655 | 9.411 | 8.180  | 8.106  | AY036118      | -0.626 |
| Kif20b        | 0.008 | -1.415 | 0.885 | -0.530 | 0.988 | 0.550 | 1.116 | -0.469 | -0.591 | Epdr1         | -0.626 |
| Epdr1         | 0.000 | -1.419 | 2.540 | 1.121  | 2.513 | 2.580 | 2.526 | 1.129  | 1.113  | Gm5069        | -0.627 |
| Trpm2         | 0.001 | -1.420 | 0.902 | -0.518 | 0.800 | 1.069 | 0.837 | -0.468 | -0.567 | Trpm2         | -0.627 |
| Gm5069        | 0.003 | -1.420 | 3.554 | 2.134  | 3.377 | 3.566 | 3.718 | 2.017  | 2.251  | Kif20b        | -0.630 |
| Hcn1          | 0.001 | -1.451 | 2.464 | 1.013  | 2.384 | 2.585 | 2.424 | 1.089  | 0.937  | Hcn1          | -0.635 |
| Foxm1         | 0.006 | -1.462 | 1.326 | -0.136 | 1.492 | 1.004 | 1.481 | -0.117 | -0.155 | Dclk2         | -0.636 |
| Gp5           | 0.009 | -1.464 | 1.854 | 0.390  | 2.144 | 1.554 | 1.865 | 0.516  | 0.264  | Pabpc5        | -0.640 |
| Pabpc5        | 0.002 | -1.474 | 1.124 | -0.350 | 1.163 | 0.966 | 1.243 | -0.480 | -0.221 | Gp5           | -0.641 |
| Dclk2         | 0.004 | -1.475 | 1.179 | -0.297 | 1.256 | 1.139 | 1.142 | -0.540 | -0.054 | Foxm1         | -0.641 |
| Phactr3       | 0.000 | -1.490 | 1.361 | -0.129 | 1.332 | 1.357 | 1.394 | -0.094 | -0.165 | Phactr3       | -0.644 |
| Gm13394       | 0.003 | -1.515 | 5.301 | 3.785  | 5.223 | 5.288 | 5.390 | 3.586  | 3.985  | Gm13394       | -0.647 |
| Itih1         | 0.001 | -1.517 | 3.908 | 2.391  | 3.751 | 4.010 | 3.963 | 2.286  | 2.496  | Izumo4        | -0.650 |
| Izumo4        | 0.001 | -1.519 | 4.223 | 2.704  | 4.332 | 4.190 | 4.147 | 2.845  | 2.563  | Itih1         | -0.651 |
| Slitrk6       | 0.006 | -1.521 | 5.783 | 4.262  | 5.561 | 6.060 | 5.728 | 4.123  | 4.402  | Arrb1         | -0.652 |
| Arrb1         | 0.000 | -1.525 | 1.092 | -0.433 | 1.062 | 1.084 | 1.130 | -0.502 | -0.364 | Tagap1        | -0.653 |
| Apob          | 0.001 | -1.528 | 0.668 | -0.860 | 0.596 | 0.574 | 0.834 | -0.873 | -0.846 | Slitrk6       | -0.653 |
| Tagap1        | 0.001 | -1.529 | 3.067 | 1.538  | 2.979 | 3.046 | 3.176 | 1.426  | 1.650  | Tmem215       | -0.654 |
| Tmem215       | 0.001 | -1.530 | 7.431 | 5.901  | 7.371 | 7.582 | 7.340 | 6.001  | 5.802  | Apob          | -0.654 |
| Ect2          | 0.007 | -1.539 | 1.676 | 0.138  | 1.837 | 1.330 | 1.861 | 0.190  | 0.086  | Cnrip1        | -0.657 |
| Tcf19         | 0.001 | -1.551 | 3.862 | 2.311  | 3.796 | 3.726 | 4.062 | 2.292  | 2.330  | Rnf157        | -0.658 |
| Cnrip1        | 0.002 | -1.559 | 3.306 | 1.748  | 3.240 | 3.359 | 3.320 | 1.542  | 1.953  | Ect2          | -0.660 |
| Aox1          | 0.001 | -1.561 | 2.495 | 0.934  | 2.373 | 2.508 | 2.605 | 0.815  | 1.053  | Tcf19         | -0.660 |
| Pid1          | 0.000 | -1.563 | 2.685 | 1.121  | 2.637 | 2.790 | 2.628 | 1.123  | 1.119  | Aox1          | -0.661 |
| Myo3a         | 0.009 | -1.567 | 3.144 | 1.577  | 2.851 | 3.531 | 3.049 | 1.605  | 1.549  | Pid1          | -0.662 |
| Rnf157        | 0.007 | -1.567 | 0.748 | -0.819 | 0.763 | 0.907 | 0.575 | -1.094 | -0.544 | Ptprr         | -0.665 |
| Actr3b        | 0.005 | -1.581 | 3.977 | 2.396  | 3.781 | 4.295 | 3.855 | 2.467  | 2.325  | St3gal4       | -0.667 |
| Gins1         | 0.008 | -1.584 | 1.095 | -0.489 | 0.934 | 0.881 | 1.469 | -0.441 | -0.538 | Mcm5          | -0.669 |
| Mcm5          | 0.002 | -1.584 | 3.383 | 1.799  | 3.415 | 3.163 | 3.572 | 1.856  | 1.742  | Myo3a         | -0.669 |
| Zbtb7c        | 0.005 | -1.586 | 1.092 | -0.494 | 1.234 | 1.268 | 0.776 | -0.559 | -0.428 | Actr3b        | -0.670 |
| St3gal4       | 0.001 | -1.593 | 2.137 | 0.544  | 2.134 | 2.192 | 2.084 | 0.394  | 0.693  | Pygb          | -0.670 |
| Myadml2       | 0.009 | -1.594 | 1.014 | -0.580 | 1.357 | 1.002 | 0.683 | -0.470 | -0.690 | Zbtb7c        | -0.670 |
| Pygb          | 0.001 | -1.594 | 4.313 | 2.719  | 4.350 | 4.443 | 4.147 | 2.752  | 2.686  | Kcnip3        | -0.671 |
| Tmem130       | 0.004 | -1.596 | 7.123 | 5.526  | 6.954 | 7.434 | 6.980 | 5.510  | 5.543  | Ugt2b34       | -0.672 |

|               |       |        |       |        |       |       |       |        |        |               |        |
|---------------|-------|--------|-------|--------|-------|-------|-------|--------|--------|---------------|--------|
| Ptpr          | 0.005 | -1.601 | 3.675 | 2.075  | 3.578 | 3.783 | 3.665 | 1.796  | 2.353  | Gins1         | -0.672 |
| Kcnp3         | 0.005 | -1.603 | 1.779 | 0.176  | 1.701 | 2.038 | 1.598 | 0.006  | 0.346  | Tmem130       | -0.673 |
| Ugt2b34       | 0.000 | -1.612 | 3.558 | 1.946  | 3.538 | 3.526 | 3.610 | 1.833  | 2.059  | Myadml2       | -0.674 |
| 1700102P08Rik | 0.005 | -1.619 | 2.363 | 0.744  | 2.064 | 2.384 | 2.641 | 0.808  | 0.679  | Aurkb         | -0.677 |
| Cdca5         | 0.002 | -1.623 | 1.442 | -0.182 | 1.513 | 1.193 | 1.619 | -0.176 | -0.188 | Lrch2         | -0.677 |
| Rpp25         | 0.000 | -1.637 | 3.951 | 2.314  | 4.029 | 3.960 | 3.866 | 2.323  | 2.306  | Cdca5         | -0.678 |
| Lrch2         | 0.001 | -1.639 | 1.795 | 0.156  | 1.779 | 1.757 | 1.849 | 0.310  | 0.002  | Csf2rb        | -0.678 |
| Aurkb         | 0.004 | -1.654 | 1.034 | -0.620 | 1.003 | 0.980 | 1.118 | -0.355 | -0.886 | 1700102P08Rik | -0.679 |
| Sult4a1       | 0.006 | -1.656 | 2.680 | 1.025  | 2.583 | 3.041 | 2.418 | 1.040  | 1.009  | Rpp25         | -0.679 |
| Clstn3        | 0.003 | -1.670 | 3.233 | 1.562  | 3.176 | 3.355 | 3.167 | 1.797  | 1.328  | Clstn3        | -0.682 |
| Csf2rb        | 0.009 | -1.674 | 3.948 | 2.274  | 3.958 | 4.062 | 3.824 | 1.922  | 2.626  | n-R5-8s1      | -0.687 |
| n-R5-8s1      | 0.004 | -1.682 | 7.885 | 6.203  | 7.703 | 8.093 | 7.859 | 6.400  | 6.006  | Sult4a1       | -0.688 |
| Sftpa1        | 0.002 | -1.692 | 1.046 | -0.646 | 1.114 | 0.875 | 1.150 | -0.498 | -0.794 | Sftpa1        | -0.690 |
| Sparcl1       | 0.001 | -1.711 | 4.784 | 3.072  | 4.961 | 4.571 | 4.819 | 3.036  | 3.109  | Trim67        | -0.696 |
| Gm12976       | 0.001 | -1.723 | 2.905 | 1.182  | 2.811 | 3.131 | 2.773 | 1.128  | 1.235  | Sparcl1       | -0.696 |
| Pimreg        | 0.007 | -1.729 | 1.527 | -0.202 | 1.556 | 1.228 | 1.797 | -0.009 | -0.395 | Mt3           | -0.697 |
| Trim67        | 0.002 | -1.736 | 0.999 | -0.737 | 0.976 | 0.931 | 1.089 | -0.969 | -0.506 | Gm12976       | -0.699 |
| Gm44109       | 0.009 | -1.746 | 2.534 | 0.788  | 2.560 | 2.176 | 2.867 | 0.619  | 0.957  | Pimreg        | -0.699 |
| Rad51         | 0.001 | -1.750 | 1.176 | -0.574 | 1.173 | 0.994 | 1.361 | -0.551 | -0.597 | Upp1          | -0.700 |
| Clu           | 0.001 | -1.750 | 7.110 | 5.361  | 7.023 | 7.203 | 7.105 | 5.490  | 5.231  | Clu           | -0.702 |
| Gm45804       | 0.006 | -1.751 | 0.472 | -1.279 | 0.190 | 0.457 | 0.770 | -1.451 | -1.108 | Rad51         | -0.704 |
| Mt3           | 0.007 | -1.763 | 2.969 | 1.206  | 2.998 | 2.873 | 3.035 | 1.559  | 0.852  | Pde8b         | -0.705 |
| Pde8b         | 0.006 | -1.782 | 1.615 | -0.168 | 1.466 | 1.806 | 1.571 | -0.465 | 0.129  | Gm45804       | -0.705 |
| Fam163a       | 0.001 | -1.790 | 3.726 | 1.935  | 3.673 | 3.706 | 3.798 | 1.765  | 2.106  | Gm44109       | -0.705 |
| Upp1          | 0.009 | -1.791 | 4.475 | 2.684  | 4.469 | 4.471 | 4.485 | 3.083  | 2.286  | Fam163a       | -0.709 |
| Sntg1         | 0.003 | -1.810 | 2.094 | 0.285  | 2.087 | 2.165 | 2.030 | 0.558  | 0.011  | Sntg1         | -0.710 |
| Rnu12         | 0.002 | -1.820 | 0.534 | -1.285 | 0.589 | 0.321 | 0.693 | -1.113 | -1.458 | Rnu12         | -0.716 |
| Gm44418       | 0.002 | -1.831 | 2.902 | 1.071  | 2.688 | 2.905 | 3.113 | 1.123  | 1.019  | Brca1         | -0.720 |
| Arhgap36      | 0.008 | -1.832 | 4.155 | 2.323  | 4.018 | 4.577 | 3.872 | 2.451  | 2.195  | Gm44418       | -0.721 |
| Gm3555        | 0.000 | -1.849 | 1.039 | -0.810 | 0.966 | 1.131 | 1.021 | -0.861 | -0.759 | Gm3555        | -0.723 |
| Nanos1        | 0.000 | -1.858 | 1.475 | -0.383 | 1.435 | 1.541 | 1.451 | -0.388 | -0.378 | Nanos1        | -0.724 |
| Brca1         | 0.004 | -1.858 | 1.059 | -0.799 | 0.997 | 0.950 | 1.230 | -1.075 | -0.523 | Arhgap36      | -0.724 |
| 1110002E22Rik | 0.001 | -1.866 | 0.592 | -1.274 | 0.573 | 0.481 | 0.722 | -1.381 | -1.167 | 1110002E22Rik | -0.726 |
| Cenpm         | 0.000 | -1.872 | 2.314 | 0.442  | 2.416 | 2.299 | 2.226 | 0.554  | 0.331  | Cenpm         | -0.726 |
| Trim9         | 0.000 | -1.880 | 2.837 | 0.958  | 2.865 | 2.853 | 2.794 | 0.881  | 1.034  | Trim9         | -0.728 |
| Neil3         | 0.001 | -1.880 | 0.957 | -0.923 | 1.053 | 0.723 | 1.094 | -0.888 | -0.959 | Reep2         | -0.728 |
| Hmmr          | 0.007 | -1.881 | 1.902 | 0.022  | 1.880 | 1.575 | 2.252 | 0.210  | -0.167 | Ipcef1        | -0.729 |
| Reep2         | 0.000 | -1.882 | 4.786 | 2.904  | 4.697 | 4.845 | 4.815 | 2.814  | 2.993  | Neil3         | -0.730 |
| Ipcef1        | 0.002 | -1.897 | 1.114 | -0.783 | 1.009 | 1.115 | 1.218 | -0.568 | -0.998 | Hmmr          | -0.731 |
| Gata6         | 0.000 | -1.908 | 2.651 | 0.742  | 2.695 | 2.522 | 2.735 | 0.841  | 0.644  | Gata6         | -0.734 |
| Cenpe         | 0.005 | -1.914 | 0.720 | -1.194 | 0.841 | 0.349 | 0.970 | -1.304 | -1.084 | Nap115        | -0.736 |
| Nap115        | 0.001 | -1.919 | 6.095 | 4.176  | 6.136 | 5.943 | 6.204 | 4.078  | 4.274  | Dlgap1        | -0.736 |
| Dlgap1        | 0.005 | -1.921 | 2.735 | 0.814  | 2.578 | 3.054 | 2.572 | 1.035  | 0.593  | Nova1         | -0.737 |
| Gnal          | 0.004 | -1.933 | 1.467 | -0.466 | 1.451 | 1.798 | 1.150 | -0.415 | -0.517 | Cenpe         | -0.738 |
| Ckap2         | 0.001 | -1.949 | 1.805 | -0.144 | 1.835 | 1.615 | 1.964 | -0.033 | -0.255 | Ckap2         | -0.742 |
| Nova1         | 0.004 | -1.959 | 2.102 | 0.143  | 2.048 | 2.176 | 2.082 | -0.175 | 0.461  | Gnal          | -0.742 |
| Cpne8         | 0.001 | -1.970 | 0.746 | -1.224 | 0.804 | 0.850 | 0.585 | -1.375 | -1.073 | Cpne8         | -0.744 |
| Meox1         | 0.002 | -1.983 | 3.141 | 1.158  | 2.991 | 2.980 | 3.450 | 1.213  | 1.102  | 1500009L16Rik | -0.746 |
| Figl1         | 0.000 | -1.989 | 0.996 | -0.993 | 1.005 | 0.986 | 0.998 | -0.986 | -1.001 | Fam83d        | -0.747 |
| Top2a         | 0.007 | -1.990 | 2.902 | 0.912  | 2.877 | 2.531 | 3.298 | 1.037  | 0.787  | Figl1         | -0.748 |
| Spic          | 0.003 | -1.994 | 2.481 | 0.487  | 2.459 | 2.712 | 2.272 | 0.306  | 0.668  | Spic          | -0.749 |
| 9430085M18Rik | 0.000 | -2.001 | 1.876 | -0.125 | 1.983 | 1.881 | 1.764 | -0.077 | -0.174 | Meox1         | -0.750 |
| Fam83d        | 0.004 | -2.004 | 0.967 | -1.037 | 0.909 | 0.822 | 1.170 | -0.750 | -1.324 | Slc35f1       | -0.750 |
| Slc35f1       | 0.000 | -2.006 | 3.491 | 1.485  | 3.427 | 3.515 | 3.532 | 1.363  | 1.608  | Adgrf1        | -0.750 |
| Adgrf1        | 0.001 | -2.011 | 1.182 | -0.830 | 1.085 | 1.262 | 1.197 | -0.657 | -1.002 | 9430085M18Rik | -0.751 |
| 1500009L16Rik | 0.004 | -2.016 | 1.722 | -0.295 | 1.727 | 1.634 | 1.805 | -0.633 | 0.044  | Tmem117       | -0.751 |
| Tmem117       | 0.001 | -2.017 | 4.040 | 2.023  | 3.979 | 4.077 | 4.065 | 2.227  | 1.819  | Rflna         | -0.751 |
| Rflna         | 0.002 | -2.023 | 3.281 | 1.258  | 3.177 | 3.296 | 3.370 | 1.507  | 1.008  | Top2a         | -0.753 |
| Rab37         | 0.000 | -2.041 | 4.716 | 2.675  | 4.879 | 4.594 | 4.676 | 2.685  | 2.665  | Rab37         | -0.758 |
| Tmem132b      | 0.000 | -2.048 | 4.501 | 2.453  | 4.359 | 4.611 | 4.533 | 2.481  | 2.425  | Tmem132b      | -0.759 |
| Nek2          | 0.002 | -2.063 | 1.846 | -0.217 | 1.930 | 1.552 | 2.057 | -0.183 | -0.252 | Mpp1          | -0.761 |
| Edn2          | 0.003 | -2.080 | 2.300 | 0.220  | 2.369 | 2.505 | 2.026 | 0.004  | 0.437  | Edn2          | -0.763 |
| Mpp1          | 0.004 | -2.097 | 2.400 | 0.303  | 2.488 | 2.469 | 2.242 | -0.029 | 0.635  | Nek2          | -0.763 |
| Sacs          | 0.000 | -2.100 | 1.523 | -0.577 | 1.588 | 1.469 | 1.512 | -0.645 | -0.509 | Hspa12a       | -0.763 |
| Gm49477       | 0.000 | -2.101 | 3.067 | 0.967  | 3.220 | 2.939 | 3.043 | 0.869  | 1.064  | AW551984      | -0.766 |
| Sema3e        | 0.000 | -2.103 | 0.550 | -1.553 | 0.428 | 0.584 | 0.638 | -1.563 | -1.542 | Elmod1        | -0.766 |

|               |       |        |       |        |       |       |       |        |        |               |        |
|---------------|-------|--------|-------|--------|-------|-------|-------|--------|--------|---------------|--------|
| Cftr          | 0.001 | -2.114 | 4.908 | 2.794  | 4.765 | 5.134 | 4.824 | 2.799  | 2.790  | Sacs          | -0.767 |
| AW551984      | 0.003 | -2.117 | 2.930 | 0.813  | 2.829 | 3.122 | 2.838 | 0.521  | 1.105  | Gm49477       | -0.767 |
| Hspa12a       | 0.005 | -2.120 | 4.413 | 2.293  | 4.354 | 4.563 | 4.322 | 2.654  | 1.932  | Sema3e        | -0.768 |
| Apod          | 0.000 | -2.122 | 1.189 | -0.933 | 1.050 | 1.357 | 1.160 | -0.958 | -0.907 | Cftr          | -0.770 |
| Ccdc184       | 0.001 | -2.142 | 2.094 | -0.048 | 1.974 | 2.024 | 2.284 | 0.140  | -0.236 | Apod          | -0.771 |
| Uhrf1         | 0.001 | -2.144 | 1.983 | -0.161 | 1.946 | 1.885 | 2.119 | 0.023  | -0.345 | Uhrf1         | -0.772 |
| Elmod1        | 0.008 | -2.145 | 1.525 | -0.620 | 1.350 | 1.727 | 1.500 | -1.035 | -0.205 | Ccdc184       | -0.772 |
| Lyrm7         | 0.002 | -2.150 | 1.519 | -0.631 | 1.613 | 1.743 | 1.202 | -0.717 | -0.544 | Cdk1          | -0.776 |
| Cdk1          | 0.001 | -2.153 | 1.802 | -0.351 | 1.981 | 1.576 | 1.848 | -0.443 | -0.259 | Gnai1         | -0.777 |
| Zfp365        | 0.001 | -2.168 | 2.700 | 0.532  | 2.644 | 2.895 | 2.560 | 0.675  | 0.389  | Lyrm7         | -0.777 |
| Cenpf         | 0.005 | -2.168 | 0.994 | -1.174 | 0.911 | 0.668 | 1.404 | -1.313 | -1.035 | Zfp365        | -0.777 |
| Mki67         | 0.007 | -2.170 | 3.178 | 1.008  | 3.284 | 2.704 | 3.546 | 1.072  | 0.943  | Ctnnd2        | -0.778 |
| Tpx2          | 0.005 | -2.176 | 2.320 | 0.144  | 2.522 | 1.901 | 2.537 | 0.256  | 0.032  | Krt222        | -0.780 |
| Gnai1         | 0.001 | -2.176 | 4.397 | 2.221  | 4.345 | 4.453 | 4.394 | 2.430  | 2.012  | Nusap1        | -0.781 |
| Ctnnd2        | 0.001 | -2.176 | 3.382 | 1.206  | 3.218 | 3.529 | 3.400 | 1.022  | 1.390  | Cenpf         | -0.782 |
| Nusap1        | 0.004 | -2.182 | 2.009 | -0.174 | 2.064 | 1.681 | 2.280 | -0.370 | 0.022  | Vopp1         | -0.782 |
| Krt222        | 0.000 | -2.184 | 2.444 | 0.260  | 2.428 | 2.583 | 2.321 | 0.196  | 0.325  | Tpx2          | -0.782 |
| Vopp1         | 0.000 | -2.196 | 2.410 | 0.214  | 2.383 | 2.528 | 2.319 | 0.265  | 0.163  | Glrbl         | -0.783 |
| Zik1          | 0.001 | -2.198 | 1.992 | -0.205 | 1.757 | 2.050 | 2.169 | -0.156 | -0.255 | Zik1          | -0.783 |
| Samd12        | 0.000 | -2.209 | 1.071 | -1.138 | 1.090 | 1.139 | 0.983 | -1.124 | -1.152 | Mki67         | -0.784 |
| Glrbl         | 0.001 | -2.216 | 4.617 | 2.401  | 4.598 | 4.637 | 4.615 | 2.212  | 2.590  | Samd12        | -0.784 |
| Stmn1         | 0.001 | -2.217 | 2.878 | 0.661  | 2.985 | 2.614 | 3.036 | 0.643  | 0.679  | Stmn1         | -0.787 |
| Gm8909        | 0.003 | -2.258 | 2.615 | 0.358  | 2.669 | 2.921 | 2.255 | 0.440  | 0.275  | Shank3        | -0.790 |
| Nostrin       | 0.001 | -2.268 | 4.430 | 2.161  | 4.289 | 4.438 | 4.562 | 2.024  | 2.299  | Gm4814        | -0.790 |
| Gm4814        | 0.003 | -2.269 | 1.332 | -0.938 | 1.124 | 1.474 | 1.397 | -1.203 | -0.673 | Clec12b       | -0.791 |
| Clec12b       | 0.002 | -2.270 | 4.317 | 2.047  | 4.497 | 4.118 | 4.336 | 1.804  | 2.289  | Nostrin       | -0.792 |
| Lgi1          | 0.002 | -2.277 | 1.862 | -0.414 | 1.683 | 2.146 | 1.758 | -0.564 | -0.264 | Cdkl1         | -0.793 |
| Cdkl1         | 0.000 | -2.279 | 4.263 | 1.984  | 4.242 | 4.338 | 4.210 | 1.817  | 2.152  | Gm8909        | -0.794 |
| T2            | 0.000 | -2.286 | 2.113 | -0.173 | 2.066 | 2.246 | 2.027 | -0.228 | -0.117 | Lgi1          | -0.795 |
| Stk32b        | 0.001 | -2.287 | 4.561 | 2.274  | 4.449 | 4.730 | 4.505 | 2.158  | 2.391  | Stk32b        | -0.795 |
| Shank3        | 0.004 | -2.288 | 1.782 | -0.506 | 1.786 | 1.908 | 1.653 | -0.858 | -0.154 | T2            | -0.795 |
| Gsdma         | 0.000 | -2.296 | 5.260 | 2.964  | 5.278 | 5.155 | 5.347 | 2.903  | 3.026  | Gsdma         | -0.796 |
| Gm25839       | 0.006 | -2.296 | 2.343 | 0.047  | 1.948 | 2.251 | 2.829 | 0.000  | 0.094  | Ckap2l        | -0.800 |
| Ckap2l        | 0.007 | -2.304 | 2.045 | -0.259 | 2.184 | 1.588 | 2.365 | -0.490 | -0.027 | Cdk15         | -0.800 |
| Pbk           | 0.006 | -2.306 | 4.161 | 1.855  | 4.308 | 3.672 | 4.503 | 1.904  | 1.807  | Elf4          | -0.800 |
| Cdk15         | 0.001 | -2.306 | 1.384 | -0.922 | 1.090 | 1.625 | 1.436 | -0.918 | -0.926 | 9530036O11Rik | -0.803 |
| Elf4          | 0.001 | -2.342 | 1.064 | -1.278 | 1.136 | 1.009 | 1.045 | -1.506 | -1.051 | Gm25839       | -0.803 |
| 9530036O11Rik | 0.001 | -2.355 | 0.678 | -1.678 | 0.688 | 0.755 | 0.590 | -1.466 | -1.889 | Pbk           | -0.803 |
| Rps6kl1       | 0.000 | -2.358 | 2.712 | 0.354  | 2.701 | 2.759 | 2.675 | 0.207  | 0.500  | Rps6kl1       | -0.804 |
| Adarb2        | 0.001 | -2.377 | 2.950 | 0.573  | 2.800 | 3.134 | 2.917 | 0.769  | 0.378  | Adgrg6        | -0.804 |
| Nuf2          | 0.001 | -2.379 | 0.925 | -1.455 | 0.945 | 0.651 | 1.178 | -1.551 | -1.358 | Adarb2        | -0.807 |
| Mxd3          | 0.000 | -2.380 | 0.896 | -1.484 | 0.921 | 0.769 | 0.999 | -1.625 | -1.342 | Mxd3          | -0.807 |
| Adgrg6        | 0.003 | -2.388 | 0.831 | -1.557 | 0.853 | 0.704 | 0.935 | -1.224 | -1.891 | Vsnl1         | -0.809 |
| Vsnl1         | 0.001 | -2.396 | 2.854 | 0.458  | 2.688 | 3.004 | 2.870 | 0.236  | 0.680  | Nuf2          | -0.809 |
| Gm13716       | 0.006 | -2.402 | 6.411 | 4.009  | 6.139 | 6.872 | 6.222 | 4.209  | 3.809  | Plppr4        | -0.810 |
| Plppr4        | 0.001 | -2.408 | 3.397 | 0.989  | 3.304 | 3.489 | 3.399 | 0.791  | 1.187  | Gm13716       | -0.814 |
| Clspn         | 0.004 | -2.431 | 0.602 | -1.829 | 0.548 | 0.259 | 0.998 | -1.985 | -1.673 | Asf1b         | -0.815 |
| Asf1b         | 0.000 | -2.435 | 2.249 | -0.185 | 2.316 | 2.102 | 2.331 | -0.208 | -0.163 | Clspn         | -0.818 |
| Lrrc55        | 0.006 | -2.442 | 6.515 | 4.073  | 6.216 | 7.004 | 6.325 | 4.236  | 3.910  | Catspere2     | -0.819 |
| Gm46603       | 0.003 | -2.479 | 3.479 | 1.000  | 3.498 | 3.814 | 3.124 | 1.120  | 0.880  | Lrrc55        | -0.820 |
| Cntnap2       | 0.001 | -2.502 | 4.552 | 2.050  | 4.399 | 4.848 | 4.409 | 2.017  | 2.083  | Gm46603       | -0.823 |
| Catspere2     | 0.005 | -2.521 | 2.312 | -0.210 | 2.358 | 2.141 | 2.436 | -0.621 | 0.201  | Cntnap2       | -0.825 |
| Rit2          | 0.000 | -2.529 | 0.594 | -1.936 | 0.551 | 0.452 | 0.778 | -1.839 | -2.032 | Rit2          | -0.827 |
| Insyn1        | 0.000 | -2.531 | 4.116 | 1.585  | 4.088 | 4.237 | 4.022 | 1.553  | 1.616  | Insyn1        | -0.827 |
| Gm38413       | 0.000 | -2.542 | 3.190 | 0.648  | 3.234 | 3.020 | 3.316 | 0.736  | 0.561  | Gm38413       | -0.829 |
| Cdc6          | 0.001 | -2.605 | 1.415 | -1.190 | 1.168 | 1.444 | 1.632 | -1.017 | -1.362 | Dok5          | -0.834 |
| Rab3c         | 0.002 | -2.618 | 3.271 | 0.654  | 3.128 | 3.611 | 3.075 | 0.529  | 0.778  | Cdc6          | -0.836 |
| lqcg          | 0.000 | -2.624 | 2.422 | -0.203 | 2.274 | 2.590 | 2.401 | -0.072 | -0.333 | S100a10       | -0.837 |
| Gm4598        | 0.001 | -2.625 | 2.316 | -0.309 | 2.258 | 2.237 | 2.451 | -0.492 | -0.126 | Gm4598        | -0.837 |
| Cth           | 0.000 | -2.650 | 1.153 | -1.496 | 1.188 | 1.076 | 1.196 | -1.414 | -1.579 | lqcg          | -0.838 |
| S100a10       | 0.002 | -2.652 | 6.439 | 3.788  | 6.366 | 6.499 | 6.453 | 4.125  | 3.450  | Rab3c         | -0.839 |
| Tmem255a      | 0.001 | -2.662 | 5.083 | 2.422  | 5.050 | 5.175 | 5.026 | 2.633  | 2.210  | Gm47541       | -0.840 |
| Gm47541       | 0.001 | -2.676 | 2.435 | -0.241 | 2.428 | 2.423 | 2.453 | 0.063  | -0.545 | Tmem255a      | -0.840 |
| Tmem47        | 0.004 | -2.681 | 3.596 | 0.914  | 3.289 | 4.084 | 3.414 | 0.823  | 1.005  | Cth           | -0.841 |
| Dok5          | 0.007 | -2.684 | 2.913 | 0.228  | 2.970 | 2.833 | 2.935 | 0.764  | -0.307 | Rtn1          | -0.841 |
| Rtn1          | 0.006 | -2.704 | 3.830 | 1.127  | 3.736 | 4.116 | 3.639 | 0.689  | 1.565  | Tmem47        | -0.848 |

|           |       |        |       |        |       |       |       |        |        |           |        |
|-----------|-------|--------|-------|--------|-------|-------|-------|--------|--------|-----------|--------|
| Lrrc55os  | 0.001 | -2.734 | 0.823 | -1.911 | 0.595 | 0.912 | 0.962 | -2.107 | -1.715 | Lrrc55os  | -0.849 |
| Reep1     | 0.000 | -2.753 | 1.427 | -1.325 | 1.596 | 1.282 | 1.404 | -1.180 | -1.470 | Sifn9     | -0.850 |
| Sifn9     | 0.008 | -2.823 | 1.509 | -1.314 | 1.245 | 1.486 | 1.795 | -0.773 | -1.855 | Reep1     | -0.851 |
| Col6a3    | 0.000 | -2.823 | 2.449 | -0.374 | 2.511 | 2.302 | 2.534 | -0.514 | -0.234 | Col6a3    | -0.858 |
| Panx1     | 0.004 | -2.833 | 0.700 | -2.132 | 0.600 | 1.155 | 0.346 | -2.345 | -1.920 | Panx1     | -0.862 |
| Gm36503   | 0.008 | -2.868 | 1.612 | -1.256 | 1.264 | 2.123 | 1.451 | -0.840 | -1.671 | Gm36503   | -0.862 |
| Gabra4    | 0.000 | -2.888 | 2.565 | -0.323 | 2.365 | 2.692 | 2.637 | -0.316 | -0.331 | Vat1l     | -0.864 |
| Ccnb1ip1  | 0.001 | -2.897 | 1.536 | -1.361 | 1.324 | 1.467 | 1.818 | -1.431 | -1.291 | Gabra4    | -0.866 |
| Cdh8      | 0.000 | -2.914 | 4.890 | 1.976  | 4.776 | 5.013 | 4.880 | 1.880  | 2.072  | Ccnb1ip1  | -0.867 |
| B3gnt9    | 0.002 | -2.921 | 3.781 | 0.860  | 3.649 | 4.166 | 3.526 | 0.636  | 1.083  | Cdh8      | -0.867 |
| Crhr1     | 0.000 | -2.967 | 4.359 | 1.392  | 4.313 | 4.270 | 4.494 | 1.337  | 1.447  | B3gnt9    | -0.869 |
| Ccm2l     | 0.000 | -2.981 | 1.092 | -1.889 | 1.021 | 1.164 | 1.090 | -1.786 | -1.993 | Thrsp     | -0.872 |
| Vat1l     | 0.006 | -2.987 | 4.578 | 1.591  | 4.601 | 4.590 | 4.544 | 1.023  | 2.160  | Crhr1     | -0.872 |
| Gng2      | 0.000 | -2.998 | 3.453 | 0.455  | 3.410 | 3.554 | 3.395 | 0.435  | 0.475  | Ccm2l     | -0.873 |
| Thrsp     | 0.003 | -3.032 | 1.513 | -1.519 | 1.614 | 1.445 | 1.479 | -1.971 | -1.068 | Gng2      | -0.875 |
| Map7d2    | 0.000 | -3.042 | 4.567 | 1.525  | 4.436 | 4.710 | 4.554 | 1.543  | 1.506  | Map7d2    | -0.879 |
| Sv2b      | 0.000 | -3.072 | 1.118 | -1.953 | 1.246 | 0.915 | 1.195 | -1.863 | -2.043 | Sv2b      | -0.881 |
| Gm9816    | 0.004 | -3.088 | 1.029 | -2.059 | 1.384 | 0.605 | 1.098 | -1.755 | -2.363 | Gm18227   | -0.882 |
| Nudt11    | 0.001 | -3.110 | 3.859 | 0.749  | 3.679 | 4.209 | 3.689 | 0.843  | 0.655  | Gm9816    | -0.883 |
| Cd96      | 0.001 | -3.116 | 0.722 | -2.394 | 0.689 | 0.831 | 0.646 | -2.645 | -2.142 | Cd96      | -0.883 |
| Hspe1-rs1 | 0.001 | -3.118 | 3.966 | 0.848  | 3.702 | 4.212 | 3.984 | 1.117  | 0.579  | Hspe1-rs1 | -0.884 |
| Tgfbf     | 0.000 | -3.175 | 2.444 | -0.732 | 2.474 | 2.354 | 2.503 | -0.948 | -0.515 | Nudt11    | -0.886 |
| Gm18227   | 0.005 | -3.178 | 0.904 | -2.274 | 0.893 | 1.058 | 0.762 | -2.809 | -1.739 | Tgfbf     | -0.888 |
| Nudt10    | 0.001 | -3.259 | 4.304 | 1.045  | 4.147 | 4.619 | 4.146 | 1.060  | 1.031  | Gm4737    | -0.892 |
| Gm4737    | 0.003 | -3.296 | 2.200 | -1.096 | 2.091 | 2.212 | 2.299 | -1.584 | -0.607 | Rgs7bp    | -0.894 |
| Rgs7bp    | 0.004 | -3.327 | 2.621 | -0.706 | 2.576 | 2.729 | 2.558 | -1.237 | -0.176 | Nudt10    | -0.897 |
| Negr1     | 0.000 | -3.352 | 3.396 | 0.044  | 3.286 | 3.570 | 3.332 | -0.178 | 0.267  | Gm7818    | -0.898 |
| Gm7818    | 0.008 | -3.389 | 0.941 | -2.448 | 1.278 | 1.014 | 0.531 | -3.068 | -1.828 | Negr1     | -0.901 |
| Dync1i1   | 0.001 | -3.414 | 2.664 | -0.750 | 2.643 | 2.827 | 2.521 | -1.033 | -0.467 | Dync1i1   | -0.905 |
| Nebl      | 0.002 | -3.535 | 2.256 | -1.280 | 2.132 | 2.579 | 2.056 | -0.937 | -1.623 | Col16a1   | -0.912 |
| Col16a1   | 0.001 | -3.564 | 0.819 | -2.746 | 0.841 | 0.887 | 0.728 | -3.136 | -2.355 | Nebl      | -0.912 |
| Nmnat2    | 0.002 | -3.565 | 2.429 | -1.136 | 2.038 | 2.900 | 2.350 | -1.014 | -1.257 | Fer1l6    | -0.916 |
| Fer1l6    | 0.000 | -3.574 | 3.128 | -0.445 | 3.063 | 3.155 | 3.167 | -0.311 | -0.580 | Nmnat2    | -0.918 |
| Fam111a   | 0.002 | -3.584 | 1.972 | -1.611 | 1.706 | 1.699 | 2.512 | -1.637 | -1.586 | Fam111a   | -0.920 |
| Gad2      | 0.003 | -3.667 | 2.329 | -1.338 | 2.165 | 2.717 | 2.105 | -0.936 | -1.740 | Gad2      | -0.920 |
| Snap91    | 0.000 | -3.683 | 3.448 | -0.234 | 3.330 | 3.715 | 3.300 | -0.302 | -0.166 | Snap91    | -0.923 |
| Rph3a     | 0.002 | -3.712 | 4.492 | 0.779  | 4.285 | 5.012 | 4.178 | 0.828  | 0.730  | Zcchc12   | -0.923 |
| Zcchc12   | 0.002 | -3.740 | 6.091 | 2.351  | 6.110 | 5.821 | 6.343 | 2.745  | 1.957  | Rph3a     | -0.926 |
| Fez1      | 0.001 | -3.832 | 2.675 | -1.158 | 2.528 | 2.675 | 2.821 | -1.485 | -0.830 | Fez1      | -0.928 |
| Prkcb     | 0.002 | -3.901 | 4.605 | 0.704  | 4.470 | 4.767 | 4.576 | 0.257  | 1.150  | Trpv1     | -0.929 |
| Spon1     | 0.000 | -3.904 | 2.902 | -1.002 | 2.874 | 2.818 | 3.015 | -1.129 | -0.875 | Prkcb     | -0.930 |
| Trpv1     | 0.003 | -3.943 | 0.795 | -3.147 | 0.789 | 0.835 | 0.763 | -2.551 | -3.744 | Spon1     | -0.933 |
| Sgca      | 0.002 | -4.047 | 0.900 | -3.147 | 0.739 | 0.903 | 1.058 | -3.635 | -2.658 | Sgca      | -0.936 |
| Gm14719   | 0.003 | -4.303 | 2.347 | -1.956 | 2.877 | 2.320 | 1.843 | -2.284 | -1.629 | Eef1a2    | -0.942 |
| Eef1a2    | 0.006 | -4.322 | 6.073 | 1.751  | 6.092 | 6.134 | 5.992 | 0.933  | 2.569  | Gm10637   | -0.947 |
| Lhfp      | 0.000 | -4.359 | 1.778 | -2.581 | 1.689 | 1.752 | 1.894 | -2.871 | -2.290 | Gm14719   | -0.950 |
| Gm10637   | 0.003 | -4.359 | 1.516 | -2.843 | 1.579 | 1.662 | 1.306 | -2.234 | -3.453 | Lhfp      | -0.950 |
| Gm47015   | 0.003 | -4.487 | 5.558 | 1.071  | 5.436 | 5.850 | 5.388 | 1.699  | 0.443  | Gm47015   | -0.952 |
| Rps24-ps3 | 0.001 | -4.504 | 5.051 | 0.548  | 5.047 | 5.122 | 4.986 | 0.059  | 1.036  | Rps24-ps3 | -0.953 |
| Cntn1     | 0.000 | -4.611 | 4.812 | 0.201  | 4.651 | 5.044 | 4.742 | -0.001 | 0.403  | Cntn1     | -0.959 |
| Adgrl3    | 0.001 | -4.853 | 1.953 | -2.899 | 1.826 | 2.188 | 1.847 | -3.346 | -2.452 | Adgrl3    | -0.964 |
| Gm13712   | 0.000 | -5.432 | 0.720 | -4.711 | 0.594 | 0.893 | 0.674 | -5.039 | -4.384 | Gm13712   | -0.976 |
| Syt10     | 0.000 | -5.664 | 5.548 | -0.115 | 5.376 | 5.843 | 5.427 | 0.083  | -0.314 | Syt10     | -0.980 |
| Prss22    | 0.002 | -5.804 | 2.678 | -3.125 | 2.185 | 3.514 | 2.336 | -3.245 | -3.005 | Gm19792   | -0.981 |
| Gm19792   | 0.001 | -5.858 | 1.330 | -4.528 | 1.416 | 1.245 | 1.329 | -3.855 | -5.200 | Ubb-ps    | -0.984 |
| Ubb-ps    | 0.000 | -5.958 | 6.485 | 0.527  | 6.383 | 6.453 | 6.619 | 0.199  | 0.854  | Prss22    | -0.984 |
| Npy       | 0.001 | -8.301 | 7.839 | -0.462 | 7.878 | 8.516 | 7.122 | -1.019 | 0.095  | Npy       | -0.997 |
| Gm15772   | 0.000 | -8.648 | 7.618 | -1.029 | 7.620 | 7.497 | 7.738 | -1.064 | -0.994 | Gm15772   | -0.998 |
| Rps2-ps13 | 0.000 | -9.488 | 6.156 | -3.332 | 6.095 | 6.320 | 6.053 | -2.659 | -4.004 | Rps2-ps13 | -0.998 |
